# Supplementary material for: Multiomics Profiling Supports Cathepsin B as a Protective Factor in Cerebral Small Vessel Disease
Source: Research Square preprint supplement (doi:10.21203/rs.3.rs-9013964/v1), 2026-04-19
Supplement: Supplementary file 1 [file 0219507a7599ef8d60e09994.xlsx]

## Sheet: Table of Contents
Table of Contents
STX1	Genetic variants used to derive the polygenic risk score of WMH volume
STX2	Demographics of the UKB-PPP cohort
STX3	Associations of the PRS of WMH volume with circulating protein levels
STX4	Demographics of the UKB-PPP cohort with neuroimaging data
STX5	Associations of selected circulating protein levels and WMH volume
STX6	Mendelian Randomization Results of CTSB on CSVD phenotypes
STX7	Inverse Mendelian Randomization Results of CTSB on CSVD phenotypes
STX8	Mendelian Randomization Results of ECHDC3 on CSVD phenotypes
STX9	Inverse Mendelian Randomization Results of ECHDC3 on CSVD phenotypes
STX10	Demographic and histopathological information of periventricular white matter samples
STX11	Quality Control metrics of sequenced snRNAseq samples
STX12	Total number of nuclei contributed by sample
STX13	Differential expression of CTSB and ECHDC3 in snRNA of periventricular WMH lesions
STX14	Associations of CTSB and ECHDC3 with cognitive outcomes in the UKB
STX15	Description of each of the five cognitive tests administered to UK Biobank participants.

## Sheet: STX1
Genetic variants used to derive the polygenic risk score of WMH volume
CHR	POS	SNP	GENE	EA	NEA	EAF	Funct	BETA	SE	P
1	89286673	rs786921	PKN2	A	G	0.6	Intronic	0.037	0.007	2.97e-08
1	215137222	rs6540873	KCNK2b	A	C	0.61	Intergenic	0.027	0.007	2.81e-08
2	43132224	rs73923006	HAAO	G	C	0.81	Intergenic	0.053	0.007	4.28e-13
2	56128091	rs7596872	EFEMP1	A	C	0.1	Intronic	0.097	0.01	2.45e-23
2	188028317	rs62172472	CALCRL	G	A	0.79	Intergenic	0.046	0.007	1.73e-10
2	203780515	rs7603972	CARF1	A	G	0.87	Intronic	0.069	0.01	1.55e-12
3	183363263	rs6797002	KLHL24	C	T	0.73	Intronic	0.046	0.007	3.26e-12
5	82859065	rs17205972	VCAN	T	G	0.2	Intronic	0.051	0.007	2.34e-12
5	121518378	rs2303655	LOC100505841	T	C	0.78	Downstream	0.049	0.007	3.58e-11
6	151018909	rs6940540	PLEKHG1	G	T	0.41	Intronic	0.043	0.006	1.32e-13
8	8179639	rs73184312	SGK223	G	A	0.72	Intronic	0.035	0.006	4.51e-08
8	9628753	rs11249945	TNKS	A	G	0.35	Intronic	0.032	0.006	3.84e-07
8	11031472	rs7004825	XKR6	T	C	0.47	Intronic	0.032	0.006	4.59e-08
10	11804452	rs11257311	ECHDC3c	G	T	0.7	Intronic	0.186	0.032	4.29e-09
10	105459116	rs4630220	SH3PXD2A	G	A	0.71	Intronic	0.048	0.007	2e-13
10	105507145	rs71471298	SH3PXD2A-AS1	T	C	0.11	Intronic	0.051	0.009	2.91e-08
10	105610326	rs10786772	SH3PXD2A	G	A	0.64	Intronic	0.042	0.006	2.26e-12
13	111043309	rs55940034	COL4A2	G	A	0.29	Intronic	0.037	0.006	4.63e-09
14	52604843	rs72680374	NID2d	T	A	0.63	Intergenic	0.032	0.006	1.43e-07
14	91884655	rs1285847	CCDC88C	T	C	0.55	Upstream	0.039	0.006	1.3e-11
14	100625902	rs7157599	DEGS2	C	T	0.29	Exonic	0.042	0.007	6.76e-09
15	65355468	rs12443113	RASL12	G	A	0.55	Intronic	0.029	0.006	3.43e-07
16	51442679	rs1948948	SALL1	C	T	0.56	Intergenic	0.037	0.006	2.06e-10
16	87227397	rs12921170	C16orf95	A	G	0.58	Intergenic	0.049	0.006	4.91e-17
17	43144218	rs6503417	NMT1¬ß	C	T	0.63	Intronic	0.054	0.006	4.85e-20
17	73888354	rs34974290	TRIM65	A	G	0.19	Exonic	0.104	0.007	1.27e-45
22	27887471	rs5762197	MN1	C	A	0.71	Intergenic	0.04	0.007	2.26e-08

## Sheet: STX2
UKB-PPP Demographics
Variable	Category	Overall
n		52560
age, mean (SD)		56.8 (8.2)
sex, n (%)	Female	28325 (53.9)
	Male	24235 (46.1)
ethnicity, n (%)	Asian	975 (1.9)
	Black	1209 (2.3)
	Mixed	346 (0.7)
	Other	613 (1.2)
	White	49013 (94.0)
smoking_status_0, n (%)	Prefer not to answer	194 (0.4)
	Never	28434 (54.2)
	Previous	18324 (34.9)
	Current	5549 (10.6)
townsend_index, mean (SD)		-1.2 (3.2)
BMI_0, mean (SD)		27.5 (4.8)
diabetes_sr, n (%)	0	49775 (94.7)
	1	2785 (5.3)
HTN_0, n (%)	0	27828 (52.9)
	1	24732 (47.1)
alcohol_0, n (%)	Prefer not to answer	63 (0.1)
	Daily or almost daily	10589 (20.2)
	Three or four times a week	11821 (22.5)
	Once or twice a week	13581 (25.9)
	One to three times a month	5728 (10.9)
	Special occasions only	6174 (11.8)
	Never	4545 (8.7)

## Sheet: STX3
Associations of the PRS of WMH volume with circulating protein levels
N_observations	Protein	Intercept_beta	Intercept_p_value	WMH_PRS_beta	WMH_PRS_p_value	age_beta	age_p_value	sex_beta	sex_p_value	PC_1_beta	PC_1_p_value	PC_2_beta	PC_2_p_value	PC_3_beta	PC_3_p_value	PC_4_beta	PC_4_p_value	PC_5_beta	PC_5_p_value	PC_6_beta	PC_6_p_value	PC_7_beta	PC_7_p_value	PC_8_beta	PC_8_p_value	PC_9_beta	PC_9_p_value	PC_10_beta	PC_10_p_value	p_bonferroni	p_FDR
44409	ECHDC3	0.157634	3.33455e-09	0.0862731	2.99925e-119	0.000813958	0.074971	-0.162743	2.77049e-106	0.0011989	7.28701e-97	-0.000481994	0.000266019	0.00144278	9.19228e-09	0.000909014	0.00719979	0.00236295	1.32257e-06	0.00222316	0.00190522	-4.63627e-05	0.945257	-0.000884199	0.236423	-0.000516133	0.535968	-9.58685e-05	0.905972	8.76682e-116	8.76682e-116
51134	CTSB	-0.372334	3.12649e-85	-0.0228302	6.81029e-18	0.00690539	2.69446e-99	0.0510796	5.87565e-22	-0.00156082	3.96963e-297	0.000852034	1.42701e-18	-0.000692916	0.000161583	-0.000522953	0.0354098	-0.000855889	0.0146326	0.000291425	0.581339	-0.000314393	0.524127	-7.44707e-06	0.989075	-0.00124523	0.0377303	-2.90564e-05	0.960686	1.99065e-14	9.95324e-15
44220	LRRC37A2	-0.127434	3.09884e-17	0.0125869	1.99375e-09	0.00222057	9.82217e-18	0.0192385	4.61657e-06	-0.00081981	1.46527e-140	0.000439593	4.47949e-09	0.0011781	1.18638e-16	-0.000758893	7.45383e-05	-0.000666109	0.0160391	-0.00103433	0.0101641	0.000248088	0.517104	-0.00193808	4.79521e-06	-0.00113014	0.0168963	-0.000413334	0.367816	5.82772e-06	1.94257e-06
50140	GYS1	0.11689	0.000425406	-0.0251437	5.29222e-08	-0.000932211	0.101272	-0.0575545	5.15475e-10	0.000386803	1.41403e-07	-0.000274722	0.103493	0.00228657	8.86804e-13	-0.000279677	0.517165	-0.00198498	0.00117907	0.000336507	0.710344	0.00163723	0.0567712	-0.000699688	0.458556	7.72893e-05	0.941142	0.00192417	0.0609617	0.000154692	3.86729e-05
51082	NID2	-0.220945	5.46006e-17	0.0178014	1.25804e-06	0.00402843	5.24894e-19	0.0868053	4.55213e-32	-0.00082748	1.27395e-45	-0.000560054	2.81618e-05	0.00247345	1.85009e-22	0.00244635	8.94395e-13	-0.00102145	0.0356299	0.000252577	0.728398	-0.00088876	0.19375	-0.00068517	0.363066	2.17645e-05	0.979184	0.000338303	0.678848	0.00367725	0.000735451
44329	S100A14	-0.122732	3.9094e-11	-0.0107635	3.05397e-05	0.0027358	9.0317e-18	0.0656424	6.19725e-37	0.000198525	6.28414e-07	6.61231e-05	0.471355	-0.00130605	7.82043e-14	-0.0015474	5.6834e-11	-0.000730357	0.0320054	0.000488801	0.322596	-0.00106539	0.0238229	-0.000250131	0.630541	-0.0021897	0.00016482	-0.000133133	0.813758	0.0892674	0.0148779
51038	ESM1	-0.415193	1.04191e-234	0.00706047	6.04241e-05	0.00686204	2.18839e-218	0.0553944	1.57362e-55	-0.00068131	5.03768e-130	0.000278177	1.54652e-05	-0.000989898	4.52393e-16	-0.00091005	3.13896e-08	-0.000912745	9.01484e-05	7.06508e-05	0.839552	-0.000639682	0.0514733	-0.000399283	0.268828	0.00116083	0.0036302	6.93353e-05	0.859429	0.17662	0.0252314
51082	BCAM	-0.337591	0	0.00458713	0.000119266	0.0061075	0	-0.00121227	0.611806	-9.06041e-05	1.69593e-06	1.1454e-05	0.791859	0.000392074	1.90625e-06	-8.54562e-05	0.441745	-0.000110363	0.484278	0.000428434	0.069562	0.000547301	0.0136806	0.00121928	6.16284e-07	-0.000106007	0.695401	0.000682673	0.0100521	0.348616	0.0435769
50708	TPP1	-0.0707068	2.04658e-05	0.00863127	0.000191476	0.00359773	1.39923e-36	-0.162581	1.80403e-266	0.000261706	1.21506e-12	-0.000173318	0.0406572	0.000705757	1.06406e-05	0.00105871	9.48518e-07	0.000424652	0.16568	0.00054349	0.235072	0.00107163	0.0129923	-0.000425825	0.369058	-0.000596054	0.255548	-0.000109365	0.831684	0.559684	0.0546475
51291	LAMA4	-0.152916	2.56689e-37	0.00622061	0.000193384	0.00235176	2.33945e-30	0.0698973	9.84097e-97	-3.76626e-05	0.15565	0.000310533	3.42165e-07	0.000926991	9.35401e-16	0.00048968	0.00171358	0.000388932	0.0784092	0.000166984	0.614394	-0.000505805	0.104698	-0.000345391	0.313605	0.000739475	0.0507559	0.000679204	0.0674816	0.56526	0.0546475
51076	COL4A1	-0.197243	6.40299e-42	0.00751446	0.000205653	0.00360252	2.73769e-47	0.00166518	0.681346	-0.000234851	3.36121e-13	0.00101382	1.27133e-42	-0.00077225	3.70224e-08	-0.000682764	0.00032863	-8.11477e-05	0.762106	0.000163255	0.683983	-0.00146732	0.000103604	0.00043554	0.294098	-4.50351e-05	0.921822	0.000480617	0.287058	0.601123	0.0546475
51266	SMPD1	-0.243584	2.79229e-43	0.00867156	0.000423373	0.0065806	2.25359e-104	-0.177475	1.05402e-280	0.000347317	5.69601e-19	-0.000231446	0.0100335	0.000648445	0.000141088	-0.000785723	0.0006472	-0.000426308	0.190709	-0.000374925	0.441002	0.000993216	0.0302779	0.00021252	0.673152	-0.00103721	0.062812	-0.000493501	0.36768	1	0.103127
50949	TFPI	-0.391913	2.91605e-259	-0.00549613	0.000499016	0.00760118	0	-0.0762504	8.23374e-128	-0.000178622	1.01609e-12	3.96519e-05	0.492733	0.000491594	7.03473e-06	0.000616543	3.15241e-05	-0.000212563	0.309497	1.58676e-05	0.959313	6.86921e-05	0.815673	0.000756945	0.0190439	-0.000505852	0.157074	0.000149678	0.669865	1	0.105536
44234	CD5L	-0.0661676	7.23007e-05	0.0080322	0.000536601	0.000572537	0.0452884	0.093539	4.88577e-90	-0.000663674	7.37334e-77	-0.000195058	0.0179646	0.000249855	0.11122	-0.00143266	1.6251e-11	-0.000372477	0.222783	-4.11993e-05	0.926023	-0.000547916	0.196312	0.000440378	0.346941	-0.00109268	0.0363531	-0.000367796	0.468912	1	0.105536
51195	EFEMP1	-1.12401	0	-0.00546477	0.000541581	0.0190428	0	0.102291	3.73987e-227	-1.83289e-05	0.4652	-0.00029268	4.29915e-07	0.00136839	1.01229e-35	0.00103261	3.47043e-12	-2.52114e-05	0.904059	0.000445167	0.153371	0.0013737	3.24862e-06	0.000730508	0.0239127	-4.62541e-05	0.897102	0.000283229	0.420263	1	0.105536
51631	AGRP	0.227907	1.35758e-33	-0.00877011	0.00085537	-0.00259932	9.32515e-16	-0.230533	0	-0.00130857	1.24253e-212	-0.000743905	9.08399e-15	-9.25978e-05	0.610608	-0.000585944	0.0169352	-0.00154866	8.55875e-06	-0.00120734	0.0202627	-0.000836159	0.0865319	-0.00106408	0.0475399	4.07597e-05	0.945481	0.000874049	0.133859	1	0.153737
51706	COL1A1	-0.123332	2.68921e-43	0.00413738	0.000894124	0.00179948	7.83447e-32	0.046273	1.15823e-76	-3.25613e-05	0.0997694	0.000285588	3.66095e-10	8.32035e-05	0.335191	-0.000162069	0.164569	-0.000174566	0.289506	0.00104769	2.14347e-05	-0.000568346	0.014267	0.00028564	0.262836	-0.000535276	0.0578911	-0.000670602	0.0154239	1	0.153737
44147	PF4	-0.141318	4.40983e-05	0.0155997	0.00119805	0.00193473	0.00111395	0.015822	0.100326	-0.000845906	3.8943e-30	-0.000105024	0.540563	0.00192863	3.40435e-09	0.00212512	1.41846e-06	-0.000413956	0.513952	0.000555503	0.546134	0.000283939	0.746838	-0.00135447	0.163173	0.00135559	0.210789	0.000620987	0.555932	1	0.194549
44147	PPBP	-0.186524	5.15594e-10	0.0128394	0.00210709	0.00210614	4.29589e-05	0.0540101	1.00105e-10	-0.000409639	1.84181e-10	-6.14302e-05	0.679864	0.00184361	7.38825e-11	0.0020231	1.25503e-07	-5.93542e-05	0.914079	0.00011282	0.887603	0.000631797	0.407808	-0.00131212	0.119411	0.00118816	0.205918	0.000602961	0.509931	1	0.310065
44220	COL24A1	-0.246392	7.34148e-35	0.00851861	0.00217723	0.00225262	5.08689e-11	0.123981	1.84017e-109	-0.00134328	3.75465e-213	-0.0003563	0.000331752	0.00102879	4.69944e-08	0.000523037	0.0392958	0.000208384	0.569573	0.000236009	0.657971	0.00141451	0.0053017	-0.000375811	0.503151	-4.14673e-05	0.947241	0.00106004	0.081256	1	0.310065
51005	APP	-0.203137	1.176e-17	0.0101091	0.00222763	0.00410775	6.20876e-24	0.00829579	0.210449	-0.000435651	1.01822e-16	-3.71278e-05	0.757616	0.00142225	4.63226e-10	0.00119601	0.000103141	0.000814326	0.062744	0.000818835	0.21249	-0.000197964	0.747776	-0.000964987	0.155112	0.000908386	0.226448	0.000353115	0.63139	1	0.310065
50698	PTGDS	-0.388409	8.53143e-284	-0.00453811	0.00238977	0.00899176	0	-0.183025	0	-0.000105763	8.34507e-06	-0.000259529	2.29077e-06	0.00124518	4.54787e-33	0.000512214	0.000256763	0.000953931	1.44415e-06	0.000180471	0.539185	0.000477485	0.0868151	-0.000138532	0.650102	-8.00334e-05	0.812928	0.000318165	0.338423	1	0.317513
51518	DKK1	-0.39436	7.74019e-77	0.00892199	0.0025636	0.00654274	4.97532e-72	0.0186703	0.00162551	-0.000323802	5.23053e-12	-0.000299201	0.00557403	0.0017791	3.71917e-18	0.00179538	8.33139e-11	-9.86146e-05	0.801222	0.000585299	0.31802	-0.000530635	0.335356	-0.000941488	0.120212	0.000244287	0.715599	0.000282742	0.667742	1	0.325801
51082	IL17RA	-0.122318	8.73477e-15	-0.00657612	0.00274829	0.00165891	8.46342e-10	-0.00468888	0.286594	0.000396949	5.3401e-30	-0.00100362	4.32042e-36	-5.90542e-05	0.696896	-0.000174217	0.394568	-0.000195554	0.501068	-0.00125805	0.00381801	0.000539826	0.186759	-0.000272064	0.545807	0.000141034	0.777339	-0.00141881	0.00368234	1	0.330788
51228	VEGFC	-0.300851	1.95076e-51	0.00826606	0.00293825	0.00479039	1.30722e-44	0.0461889	1.02394e-16	-0.000616541	2.06462e-44	-0.000301121	0.00305079	0.00138777	5.62894e-13	0.00148596	1.0191e-08	-0.000115192	0.75404	0.000558756	0.310598	-0.000769328	0.136337	-0.000836827	0.141018	0.000585115	0.352563	0.00109753	0.0752469	1	0.330788
42820	CPLX2	-0.0225838	0.0428383	-0.00461152	0.00294235	0.000312364	0.102469	0.0151081	1.12329e-06	-6.71891e-05	0.00476854	0.000176784	0.00123531	0.000212019	0.041903	7.70128e-05	0.586259	0.000485097	0.017653	9.65946e-05	0.742656	-0.000228371	0.419966	0.000171935	0.581498	0.000464836	0.182852	-0.000599943	0.0780141	1	0.330788
51291	LGMN	0.00461435	0.722055	0.00534354	0.00313095	0.000739935	0.00088042	-0.0507465	1.60327e-44	0.000388537	1.48622e-41	-0.000181845	0.00586534	0.0010744	8.49485e-18	0.000464871	0.00601524	0.000489413	0.0410004	0.000366015	0.308216	-3.23128e-05	0.923805	0.000233791	0.529099	-0.000251088	0.54049	3.54321e-05	0.929864	1	0.338955
51291	TIMP3	-0.615694	1.03809e-39	0.0190238	0.00344387	0.0121879	2.6434e-52	0.140902	3.01254e-27	-0.00285639	7.90662e-167	-0.001554	5.89447e-11	0.00373191	1.04135e-16	0.00503906	1.25584e-16	0.000511758	0.552364	-0.0021452	0.0967682	0.00360107	0.00303804	-0.00326802	0.0144287	-0.0028237	0.0556108	0.000332143	0.818532	1	0.359516
42978	CACNB1	0.0825361	9.71998e-05	-0.00842556	0.00425177	-0.000149055	0.681437	0.0246825	2.81514e-05	-0.000173254	0.000137239	0.000251579	0.016495	-2.80218e-05	0.888396	0.00047191	0.0791906	0.000213297	0.583165	0.000523008	0.349043	0.000170475	0.751853	-0.000284083	0.632165	0.000105939	0.872811	8.83341e-06	0.989105	1	0.428549
51076	MEP1B	-1.00409	1.00772e-125	0.0166288	0.00447787	0.0129111	1.13427e-71	0.050235	1.81903e-05	-0.000908916	1.9221e-22	-0.00331553	4.69708e-54	-0.000121084	0.765182	0.000900794	0.101065	-0.00197744	0.0106981	-8.14843e-05	0.943957	0.00245239	0.0247596	0.000661975	0.581101	0.00116061	0.3815	9.68261e-05	0.940841	1	0.436293
50665	DPP7	-0.0604005	0.00500163	0.00842906	0.00493376	0.00282182	2.10839e-14	-0.148353	7.34479e-134	-0.000257961	6.58864e-08	-0.00043196	8.33493e-05	0.00188374	1.27304e-19	0.00122806	1.2551e-05	-0.000339955	0.392102	0.000220065	0.716628	0.00144755	0.00969837	-0.000694738	0.260907	0.00167327	0.0137868	0.000159447	0.811481	1	0.464889
43434	COL5A1	-0.245169	3.66641e-66	0.00555079	0.00509059	0.00409306	9.07722e-63	0.0943947	1.35135e-124	-0.000206775	1.25525e-11	0.000359355	3.33171e-07	0.000219037	0.102219	-0.000122142	0.501479	-0.000112253	0.666677	0.000464485	0.22289	0.00035269	0.328893	-0.000182562	0.647047	-0.000752337	0.0927536	-0.00136928	0.00153796	1	0.464889
49867	ARHGAP1	0.177852	7.36274e-27	0.00644953	0.00524849	-0.00270179	1.93318e-21	-0.0736329	6.07328e-57	1.6354e-05	0.655257	3.56607e-05	0.67198	0.000526234	0.000979218	0.000270576	0.207588	-0.00202248	3.97876e-11	0.000449942	0.321828	-0.000454494	0.288991	-0.000192267	0.683844	0.000833065	0.112133	0.000561564	0.272672	1	0.464889
51505	WIF1	-0.0846782	8.12014e-12	0.00479042	0.00556476	0.000195708	0.356748	0.142261	0	-0.000452102	8.03676e-61	0.000451691	6.5193e-13	-0.000203454	0.0876183	-0.000367889	0.0224606	3.1402e-05	0.89072	0.000991643	0.00366948	0.0001627	0.612145	0.000503754	0.153727	-4.4402e-07	0.999096	0.000207886	0.587251	1	0.47442
43602	KIAA1549	0.0100067	0.68673	-0.00952656	0.00575715	-0.00045208	0.28826	-0.000935804	0.892174	-8.97561e-05	0.0911577	-2.17636e-05	0.859502	0.000103646	0.658113	0.000227087	0.472826	-0.000539884	0.235244	-0.000133436	0.83994	0.000994467	0.115404	-0.00108088	0.120714	0.000766125	0.324204	0.000678656	0.371652	1	0.47442
44414	CEACAM6	-0.209022	3.69382e-44	0.00574358	0.00584301	0.00424317	4.52978e-61	0.0103197	0.013297	-0.000672318	4.69827e-97	-0.000105184	0.15628	-0.000300141	0.0334339	-4.88463e-05	0.797382	0.00241787	1.4607e-18	0.000506715	0.2041	0.00196473	2.30098e-07	0.000316541	0.450768	0.00105239	0.024822	-0.0015891	0.000489042	1	0.47442
51518	VCAN	-0.477784	0	-0.00404796	0.00679743	0.00806791	0	0.0498977	3.68128e-62	-0.000407503	5.80303e-66	-0.000249867	4.67904e-06	-0.0011055	1.31997e-26	0.000423983	0.00241082	-0.000629623	0.00147488	-0.00130594	1.04907e-05	-0.00093283	0.000808271	-7.9449e-05	0.795335	0.0011755	0.000524549	0.00058457	0.0791719	1	0.511615
44201	ARG2	0.101719	3.70179e-11	0.00576775	0.00693325	-0.00136692	2.18249e-07	0.053865	2.56391e-36	0.00015399	2.91919e-06	0.000188965	0.0129605	0.000106577	0.460989	0.000419019	0.032132	-5.84174e-06	0.983466	0.000691462	0.0911012	-0.000432288	0.268799	-0.000220275	0.609892	-0.000261938	0.586584	-6.09545e-05	0.896363	1	0.511615
51291	PDGFB	-0.263368	1.03308e-17	0.0115592	0.00695641	0.0042697	5.37663e-16	-0.0352512	3.96243e-05	-0.00116731	1.01001e-65	-0.000354315	0.0233935	0.00184898	4.22605e-10	0.00127682	0.00144294	-0.0012051	0.0336025	0.000448105	0.598339	5.92146e-05	0.941002	-0.00107465	0.221843	0.000160157	0.869054	0.000941276	0.323473	1	0.511615
44409	NT5C	0.027477	0.295613	0.00983009	0.00711321	0.000521367	0.247299	-0.0790242	3.17905e-27	-9.12373e-05	0.106065	-0.000906729	3.48824e-12	0.00161727	6.49751e-11	4.94113e-06	0.988177	-0.00255054	1.19008e-07	0.0002872	0.684121	0.000111214	0.867313	0.000147252	0.841476	0.00017002	0.836162	0.000249064	0.75559	1	0.511615
51082	NRP2	-0.561674	0	0.00383945	0.00717626	0.00915499	0	0.0961283	9.47535e-245	0.000720167	2.73179e-219	-0.00012161	0.0193392	-1.13442e-05	0.908398	-0.000577624	1.42345e-05	-0.000123072	0.514964	0.000143535	0.61177	0.000536798	0.0435136	5.20327e-05	0.858999	0.000366109	0.25897	0.000492862	0.120813	1	0.511615
51706	MFAP5	-0.389409	1.00673e-140	-0.0057394	0.00741738	0.0084926	1.7205e-225	-0.172822	0	0.00014288	2.71417e-05	-0.000379882	1.26891e-06	0.00207852	2.22144e-44	0.000338459	0.0917079	-0.00119672	2.45764e-05	0.00042928	0.311664	0.000385084	0.334688	-0.00133521	0.00235793	-0.00131283	0.00688072	0.000810909	0.0887755	1	0.514369
43435	FGA	-0.626195	0	0.0041919	0.00756684	0.0103344	0	0.0929156	5.69312e-191	0.000264722	6.50378e-28	-6.78122e-05	0.224509	0.000615759	6.85578e-09	0.000502487	0.000477747	0.000629463	0.0022876	0.000461951	0.128631	0.000722195	0.0120549	-0.000165812	0.602336	-0.0012315	0.000493228	0.000263858	0.442432	1	0.514369
51518	FUT3_FUT5	-0.707059	0	0.00607144	0.00790625	0.0140948	0	-0.170794	1.11765e-300	-0.00160196	0	0.00139519	1.18379e-62	-0.000293028	0.0639626	8.56389e-05	0.688411	0.00221351	2.63281e-13	2.90151e-05	0.948918	0.00134725	0.00154827	0.00110803	0.0179432	-0.000662966	0.200647	-0.000135208	0.790499	1	0.525227
50883	ANGPT1	-0.423493	7.77696e-45	0.0110627	0.00837599	0.00659589	2.68892e-37	0.00540965	0.519998	-0.000700951	8.81096e-26	7.78469e-05	0.612109	0.0018142	4.36914e-10	0.00244428	4.80029e-10	-0.00121065	0.0295712	0.000496456	0.550496	-0.000212582	0.786035	-0.00179167	0.0374098	0.00106622	0.26268	0.000782572	0.402389	1	0.544067
43602	CEP290	0.0725652	0.000102683	-0.00680913	0.00875566	-0.000289145	0.366983	-0.00407466	0.433069	-8.39271e-05	0.0359003	-0.000122117	0.187106	-8.01665e-06	0.963739	3.83864e-05	0.871951	-0.000334121	0.329221	-0.000322219	0.517121	-3.41382e-05	0.942774	-0.000802389	0.126002	0.000143627	0.806083	-0.000651881	0.254374	1	0.556365
42820	GATA3	-0.0111366	0.237781	-0.00342604	0.00901516	7.71428e-05	0.633562	0.000508838	0.846289	-3.20152e-05	0.11191	1.1569e-05	0.802651	0.000133737	0.129279	0.000189377	0.11365	-4.84698e-05	0.779279	3.54496e-05	0.886736	4.88921e-05	0.83828	0.000581329	0.0276034	-7.90988e-05	0.788752	-0.000374135	0.193908	1	0.557744
50678	TNR	-0.113644	1.71444e-13	-0.00558941	0.00928007	-0.000144193	0.585573	0.229468	0	0.000694275	1.45562e-91	-6.89481e-05	0.377531	0.0001696	0.252426	-0.00107958	7.98622e-08	-0.00213121	6.65261e-14	0.000439389	0.298327	0.000493452	0.218136	-0.00145995	0.000887699	-0.00198006	4.87794e-05	-0.000572178	0.232102	1	0.557744
43232	PECR	0.0261448	0.0101254	0.00367417	0.0093498	0.000154058	0.376936	-0.00717862	0.0111662	-8.2684e-05	0.000153157	0.00013851	0.00618735	0.00011858	0.216229	-3.48515e-05	0.787793	-0.000449124	0.0158451	0.000176571	0.513743	0.000158242	0.539407	-1.96945e-05	0.944881	-4.04595e-05	0.899123	8.33998e-05	0.787373	1	0.557744
42791	DEFB103A_DEFB103B	0.0271058	0.066643	0.00532867	0.0096309	0.000549867	0.0301074	-0.0213215	2.20471e-07	-9.8259e-05	0.00192661	-0.000158139	0.0312652	0.000152213	0.274964	9.23846e-05	0.624258	0.000136534	0.614424	1.16266e-05	0.976239	-0.000142604	0.704394	-0.000624356	0.131585	0.000379142	0.411786	-5.50705e-05	0.902768	1	0.563022
50424	PIGR	-0.25345	2.485e-73	0.0050063	0.0100557	0.00524956	5.56484e-106	-0.00859431	0.0275099	-0.000531324	3.98836e-66	-0.000502614	1.50084e-12	0.00115297	1.12334e-17	0.000464318	0.0105524	0.00322386	6.13563e-36	-0.000318498	0.406811	0.000863961	0.0173639	0.00116526	0.00351226	0.00177875	5.84015e-05	-5.7432e-05	0.894508	1	0.566358
51038	EPCAM	-0.187944	5.38816e-08	-0.0123691	0.0102359	0.000963748	0.103864	0.365097	0	0.000775279	5.10943e-24	-0.000471852	0.00732424	-0.0031477	3.51609e-21	-0.00209966	3.10614e-06	-0.00135286	0.0340061	0.000485669	0.611136	-0.00374939	3.05821e-05	-0.000728421	0.461187	-0.00454708	3.20805e-05	-0.00254903	0.0173803	1	0.566358
43071	SCPEP1	-0.0913286	4.27035e-07	0.00644345	0.0102692	0.00360335	3.05392e-31	-0.13249	5.18702e-152	0.000600804	5.78769e-54	2.8975e-07	0.997424	0.000805276	2.20187e-06	0.000733912	0.00140576	-0.000387746	0.240905	0.000392497	0.413224	0.000767752	0.0934938	0.000635412	0.20909	0.00108689	0.0551444	0.000138704	0.8005	1	0.566358
51279	CCL5	-0.415588	6.0909e-30	0.0130349	0.0104987	0.00531977	2.10326e-17	0.144154	2.74722e-45	-2.97265e-05	0.713372	0.00106655	1.08172e-08	0.00233324	3.95616e-11	0.0027706	6.86613e-09	0.001498	0.0262989	0.000213848	0.831612	-6.57706e-05	0.944852	-0.000440682	0.672594	0.00338582	0.00333304	0.00515664	5.31411e-06	1	0.56797
51631	TNFSF12	-0.110815	2.62007e-27	0.00363687	0.010832	0.00152028	4.70299e-18	0.0572464	5.2879e-89	-0.000656854	1.72375e-182	9.55426e-05	0.0664866	-0.000125408	0.203778	0.000194318	0.144429	-0.000864754	4.654e-06	0.000767156	0.00656239	0.000317831	0.229903	-0.000442039	0.12929	0.000313553	0.332339	-0.000415012	0.189628	1	0.56797
49871	TDGF1	-0.0513215	0.317062	-0.0181948	0.0109318	0.00552971	3.29826e-10	-0.0705222	8.42361e-07	-0.00278273	1.56627e-132	-0.00146899	1.65303e-08	0.00378456	1.81629e-14	-0.00284325	1.93704e-05	-0.00973148	9.55559e-25	0.00204954	0.143876	-0.00202517	0.127948	0.00277628	0.057503	-0.00237768	0.142865	-0.000385557	0.808542	1	0.56797
51228	NELL1	0.253979	2.76168e-64	0.00531055	0.0110757	-0.00423354	7.38104e-61	-0.0270985	9.40086e-11	-0.000467306	4.56121e-45	-5.38484e-05	0.481205	-0.00019466	0.178715	0.000317734	0.103436	-0.00111144	5.85043e-05	0.000589658	0.154854	0.000358779	0.355722	-0.000501389	0.240977	-0.00020446	0.665833	-0.00117924	0.0110497	1	0.56797
44201	ZNF830	0.817931	2.61383e-182	0.00979967	0.0126267	-0.0107373	5.21036e-108	0.0947422	2.32012e-33	-0.000896812	1.68799e-49	0.000469036	0.000798909	-0.000559026	0.0355258	-5.9843e-05	0.867856	-0.00120454	0.0201702	-0.000290383	0.699659	-0.000506157	0.48146	0.00128414	0.105846	-0.00386407	1.29527e-05	-0.000537661	0.532193	1	0.636342
44414	BDNF	-0.391673	9.66167e-40	0.0102644	0.0128475	0.00462751	9.82621e-20	0.111463	1.74822e-41	-0.000132073	0.0375921	-0.000183119	0.212568	0.00194704	3.24978e-12	0.0025325	1.80518e-11	0.000138116	0.799665	0.000535836	0.497607	0.000158217	0.83333	-0.000607742	0.464618	0.000681156	0.463181	-0.000144379	0.872877	1	0.636495
50678	TNFSF14	-0.16403	4.13904e-15	0.00716247	0.013869	0.00313707	2.08502e-18	0.0153903	0.00830016	-0.000633492	1.28798e-42	-0.000326993	0.00200892	0.000791131	8.14308e-05	0.001142	2.77725e-05	0.000183784	0.633249	0.000885453	0.121878	0.000383355	0.480085	-0.000519218	0.382902	-0.000787632	0.233055	-0.00123077	0.0578027	1	0.663843
50116	JCHAIN	-0.349288	7.20088e-57	0.00749872	0.0141662	0.00428977	4.81376e-30	0.167421	2.54091e-163	0.000170074	0.000476728	-6.35337e-05	0.569829	0.000477444	0.0241468	-0.000839552	0.00322488	0.00112371	0.00551387	-0.000245395	0.682301	-0.00132966	0.0192291	-0.00034535	0.580726	-0.000559017	0.420669	-0.000437419	0.519054	1	0.663843
44300	CLSTN3	-0.213438	2.64746e-83	0.00375567	0.0142711	0.00400103	4.97652e-99	0.000886075	0.772505	-7.54928e-05	0.00141626	-6.22188e-05	0.253326	0.000917698	8.63288e-19	5.10851e-05	0.715098	2.09382e-05	0.917419	0.000198904	0.497494	-9.56156e-05	0.73221	0.000795864	0.00992694	0.000204024	0.554289	5.21759e-05	0.876268	1	0.663843
42978	PCARE	0.33744	1.06222e-28	0.0103425	0.0143079	-0.0028802	3.1035e-08	0.0403968	1.71898e-06	-0.000339788	1.79613e-07	0.000183637	0.221842	-0.000524086	0.0669659	-5.34558e-05	0.889615	-0.00046502	0.403687	0.000112163	0.888522	-0.000837059	0.278517	0.0010057	0.23689	0.00118458	0.211511	-0.000534582	0.56408	1	0.663843
43434	GHR	0.0497526	7.90122e-06	-0.00376632	0.0150256	-0.00135903	1.13686e-12	0.0293721	2.61164e-21	0.000140195	4.19994e-09	-0.000384675	2.77425e-12	0.000736904	2.03534e-12	0.00101497	9.07022e-13	2.88185e-05	0.887498	0.000888506	0.00285563	0.00144362	3.18514e-07	-0.000164567	0.597464	-0.000612579	0.079914	7.06251e-05	0.834427	1	0.686247
51430	FGF21	-0.781456	4.49101e-68	-0.0151116	0.0155079	0.0174986	1.7423e-114	-0.265895	5.30196e-100	-0.000701899	1.50846e-12	-0.00150508	3.32033e-11	0.00438048	2.4901e-24	0.00399992	6.44712e-12	0.00703054	1.77533e-17	0.00128683	0.296538	0.0030557	0.00837871	0.000287907	0.821418	0.000584328	0.679696	-0.000642136	0.642566	1	0.691711
51122	REG4	-1.12073	0	-0.00590394	0.0164097	0.0207538	0	-0.050949	4.95603e-25	0.000116894	0.00281627	0.000123494	0.169475	0.000255474	0.133236	9.38498e-05	0.683272	0.00121893	0.000184046	-0.0012476	0.010604	-0.00108038	0.0187085	-0.000307654	0.54247	0.000395207	0.478947	0.000438672	0.42283	1	0.691711
44480	LRG1	-0.330174	1.93592e-270	0.00311297	0.0165402	0.00468123	3.32781e-186	0.135895	0	-0.000354972	2.65778e-70	0.00032475	2.0779e-12	0.000832888	2.5866e-21	0.000280799	0.0181484	-2.64569e-05	0.877125	0.000140506	0.572364	0.000176331	0.457297	-0.000166651	0.525034	-0.000879095	0.00264142	0.000163478	0.565068	1	0.691711
50865	IGFBP6	-0.33065	8.08403e-205	-0.00359744	0.0166441	0.00940849	0	-0.337378	0	-5.82085e-05	0.014587	6.27408e-06	0.909122	0.00112777	2.40352e-27	-0.000140189	0.319639	-0.00103409	2.0377e-07	0.000556173	0.0601333	5.63221e-05	0.840739	-0.000321183	0.295472	-0.000302358	0.374215	0.00121138	0.000287879	1	0.691711
51076	ICAM5	-0.262958	2.08697e-57	0.00546709	0.0170514	0.00336966	7.52289e-33	0.0847333	8.10474e-76	-0.00175097	0	5.84645e-05	0.485384	0.00111199	2.54749e-12	0.000923152	1.79148e-05	0.00359574	2.41313e-32	0.00111729	0.0138723	0.000789622	0.0649794	-0.000623706	0.184465	0.00282948	5.16139e-08	-0.000341911	0.503504	1	0.691711
49784	BGN	-0.305395	6.70537e-13	-0.014132	0.0170956	0.00473509	8.11757e-11	0.344926	2.46533e-184	0.00275498	1.51936e-187	0.000698906	0.0012077	-0.000837308	0.0407622	-0.00201762	0.000247923	-0.00112643	0.151592	6.14797e-05	0.957886	-0.00111988	0.308201	0.000547363	0.651169	-0.00132145	0.325832	0.000817697	0.533339	1	0.691711
44201	ZNRF4	0.0837932	1.34047e-05	0.00635457	0.0175012	-0.00115083	0.000490874	0.0213521	6.6724e-05	-0.000108065	0.00875592	-7.26466e-05	0.445443	0.000709474	8.87416e-05	0.000788196	0.00128524	-0.000241834	0.493196	0.000408282	0.425534	0.000846359	0.0837617	7.49209e-05	0.889758	-0.000575942	0.339574	1.65322e-05	0.977489	1	0.691711
43434	ADD1	0.297455	2.55541e-31	0.00843247	0.017584	-0.00345694	3.03548e-15	-0.175999	1.36173e-134	0.000165241	0.00252184	-0.000231098	0.067041	0.00140153	5.44866e-09	0.000824472	0.0113642	-0.0011651	0.012628	0.00148972	0.029183	0.00116288	0.0724903	0.00157879	0.0271671	-0.00114603	0.153094	0.000469336	0.54468	1	0.691711
51228	CD27	-0.657241	0	-0.00486492	0.0182047	0.0124748	0	-0.0373483	1.35784e-19	0.000100205	0.00215476	-0.000485408	1.18177e-10	0.00237647	3.80275e-62	0.000357134	0.0632675	0.0021703	1.70413e-15	0.000336696	0.409784	0.00152911	6.50144e-05	0.00160872	0.000134895	0.000149114	0.749265	0.00162489	0.000380993	1	0.691711
49867	RASSF2	-0.205173	5.95779e-23	-0.00683568	0.0184033	0.00548175	2.98472e-53	-0.0834537	8.5945e-47	2.81161e-05	0.540789	-0.000388101	0.000240945	0.00101158	4.44481e-07	0.000411025	0.12716	0.000980503	0.010713	0.000842979	0.139147	0.000826274	0.124535	0.00104648	0.0773827	-0.00377551	9.68284e-09	-0.00104388	0.104219	1	0.691711
43232	LONP1	0.0989614	0.00146415	0.0101782	0.0185966	-1.55767e-06	0.99767	-0.0703828	4.3047e-16	0.00104289	8.68447e-55	-0.00079693	2.62683e-07	0.00232751	2.16371e-15	0.00130848	0.000955342	-2.0411e-05	0.97141	0.00120772	0.144276	0.00176733	0.0250577	0.000265517	0.760604	0.00151187	0.121511	0.00137379	0.146408	1	0.691711
51301	ACP5	-0.411214	2.38859e-265	0.00383671	0.0190523	0.00846962	0	-0.143626	0	0.000308881	1.44867e-32	-0.000766346	2.29547e-37	0.000497536	1.19801e-05	0.000659854	1.72469e-05	0.00103296	1.89732e-06	-0.000262651	0.41645	0.00109461	0.000333993	-0.000853114	0.0108868	-1.57756e-05	0.96605	-0.000392206	0.281759	1	0.691711
50116	CXCL12	-0.130772	8.3149e-20	0.00467132	0.0194144	0.00186613	3.44444e-14	0.0599613	1.36534e-50	-0.000572138	4.87082e-72	-0.000109883	0.132716	-0.00052118	0.000166675	-9.4998e-06	0.959339	-0.000172151	0.51543	0.000427227	0.275684	-0.000698157	0.0600702	0.000169659	0.678102	0.000754206	0.0965445	-8.48895e-05	0.8482	1	0.691711
50140	PTN	-1.24833	0	0.0058246	0.0194247	0.0198993	0	0.230419	0	-2.22263e-05	0.574914	0.000370599	4.66236e-05	0.000475245	0.00587418	0.000771157	0.000929131	0.000279348	0.3973	0.000181092	0.71096	0.0011967	0.00983142	-0.000598405	0.239855	0.000789308	0.162113	0.000293233	0.596498	1	0.691711
43120	HS6ST2	0.0754787	3.3044e-10	-0.00390179	0.0196662	0.00136873	3.0846e-11	-0.226145	0	-0.000177778	5.06506e-12	-0.000471976	2.63874e-15	0.000168395	0.137154	-0.000118447	0.438526	-0.000684288	0.00189433	-0.00066256	0.0372009	3.09999e-06	0.991895	-0.00150483	7.81974e-06	-0.000805037	0.032279	0.000630844	0.0854283	1	0.691711
44329	NARS1	-0.155502	1.791e-20	0.00543328	0.0196877	0.00227796	2.34127e-15	-0.042478	8.41157e-20	-0.000206059	1.00492e-08	-0.000112743	0.173578	0.000277477	0.0784373	0.000171445	0.421084	-0.00177882	7.20626e-09	8.85926e-05	0.842538	-8.55681e-05	0.840596	-0.000556124	0.236064	-0.000215238	0.68152	-0.000166721	0.743749	1	0.691711
51624	SPP1	-0.960543	0	0.00533412	0.0198298	0.0164579	0	0.0655598	2.51922e-46	-0.000366127	8.43189e-24	0.000123411	0.14039	-0.000396989	0.0123356	-7.15757e-05	0.738929	0.000967121	0.00141409	0.00063602	0.16035	-0.00070836	0.0968394	6.22513e-05	0.894435	0.000754324	0.145889	-0.000424157	0.404536	1	0.691711
49871	MMP13	-0.277871	9.26616e-126	0.0037671	0.0199769	0.00443145	4.44869e-109	0.0460166	1.22624e-45	-1.45117e-05	0.571492	2.26654e-05	0.700477	-2.50686e-05	0.822588	-0.000253308	0.0927924	-0.000245354	0.252578	0.000200705	0.52737	-0.000433485	0.150184	-0.000103254	0.755064	7.00394e-05	0.84884	0.000613878	0.0884451	1	0.691711
43195	PTH	-0.480366	4.28572e-60	-0.0094514	0.0204313	0.0111275	8.62439e-108	-0.205822	1.60878e-139	0.00101686	1.28298e-58	-0.00162298	4.95587e-29	0.00365459	6.23324e-40	-0.00215527	7.54937e-09	-0.003542	4.34721e-11	0.00339957	1.14794e-05	0.00148398	0.0462888	0.00326333	6.89253e-05	0.00177135	0.0531661	-0.000774243	0.386285	1	0.691711
44448	TREML1	0.0424738	0.0234169	0.00603273	0.0205751	-0.000139423	0.664456	0.0231196	9.16076e-06	-4.78837e-05	0.23416	-9.44158e-05	0.309691	0.00107254	1.25549e-09	0.000992412	3.19007e-05	-0.000831737	0.0154269	0.000361703	0.468599	0.000361684	0.44701	-0.000727794	0.165591	0.000588634	0.315202	0.000490318	0.390268	1	0.691711
50953	CTSC	-0.317996	1.20535e-92	0.00501151	0.0207246	0.0075012	5.84255e-173	-0.142295	2.29238e-233	-0.000393103	5.89427e-30	0.000517541	6.7076e-11	-0.000261427	0.0815144	0.000638426	0.0016284	-0.000642794	0.0250668	-0.000884012	0.0395233	0.000945412	0.0194382	-9.17878e-05	0.836361	-2.25094e-05	0.963451	0.000643404	0.182722	1	0.691711
44414	CTHRC1	-0.581005	0	0.00333073	0.0213328	0.0123964	0	-0.218453	0	8.63343e-05	0.000106449	0.000471168	6.17003e-20	0.000784398	1.22419e-15	0.000567298	1.75806e-05	-0.000625396	0.00105118	0.000574247	0.0382093	-0.000360579	0.171478	0.000303982	0.296971	-0.000342994	0.292184	-7.09613e-05	0.822571	1	0.691711
42948	DENND2B	0.0790586	7.6362e-06	0.00565898	0.0214938	-0.000224676	0.458476	0.0282131	9.71992e-09	-7.02224e-05	0.0628983	0.000143944	0.0982692	0.000222906	0.178747	-1.60217e-05	0.943058	-0.000446792	0.168516	-2.74709e-05	0.952954	0.00026741	0.550978	-0.000766044	0.121264	-0.00119559	0.0304338	-0.000518152	0.33618	1	0.691711
51076	SDC1	-0.0612798	1.49293e-05	0.0045245	0.0217734	0.00354451	3.37464e-48	-0.20562	0	-0.000147862	2.53848e-06	9.77603e-05	0.175204	0.000202271	0.138832	1.91751e-05	0.917529	0.00181302	3.89673e-12	0.000640655	0.10109	0.00136969	0.000199446	-0.00011961	0.767411	0.000308584	0.490027	-0.000337366	0.443031	1	0.691711
51518	CDH3	0.244122	1.90132e-81	-0.00407188	0.0219637	-0.00334329	1.16778e-52	-0.0714949	2.09328e-89	-0.00087298	1.20494e-208	0.000659506	2.83752e-24	0.000654887	1.01565e-07	-0.00107494	9.64921e-11	0.000176533	0.453141	-0.000882476	0.0122133	0.000104054	0.753179	-0.00131309	0.000309536	-0.000789274	0.0500648	0.00110459	0.00525091	1	0.691711
50999	CCL7	-0.949077	0	0.00679705	0.0220384	0.0174547	0	0.0326444	4.07423e-08	0.00202934	0	0.00057673	1.02229e-07	0.00189403	2.8615e-20	0.00122164	1.11333e-05	0.000714069	0.0695464	0.000723214	0.216529	0.000126847	0.818286	3.91008e-05	0.948628	0.000878548	0.191706	0.00108091	0.101447	1	0.691711
51076	CGREF1	-0.409942	1.29164e-157	-0.0048616	0.0223478	0.00753563	1.49093e-180	0.000491934	0.908137	-5.54365e-05	0.102098	0.000330929	2.11749e-05	0.000658629	7.98006e-06	0.00109929	3.79711e-08	0.000603488	0.0322459	0.00159947	0.000148862	-0.000800671	0.043904	0.000684131	0.116984	-0.000805845	0.0948526	0.000355865	0.453379	1	0.691711
51143	SIAE	-0.220245	3.29841e-39	0.00534657	0.0225222	0.00532816	3.81531e-76	-0.101511	2.18608e-103	-0.000144134	0.000104422	-0.000261866	0.0022351	0.00146715	1.5336e-19	0.000975261	8.33915e-06	-0.000226571	0.465206	0.000791306	0.0884281	0.0010058	0.0209314	-0.000263699	0.582148	0.000884358	0.0956216	0.000170835	0.742566	1	0.691711
43120	CASP9	0.0846412	0.000137376	0.00704113	0.0227628	-0.000761326	0.0455694	-0.020441	0.000941981	8.51699e-06	0.857948	-0.000344127	0.00180887	0.000909522	1.40444e-05	0.000415745	0.141276	-0.002139	1.49905e-07	2.09854e-05	0.971518	-0.00110529	0.0500666	0.000206786	0.739619	0.000583198	0.401404	0.000617178	0.362607	1	0.691711
50140	ACE2	-0.345127	1.49279e-74	0.00598195	0.0227965	0.0123768	0	-0.463959	0	0.00058385	2.73389e-44	4.8157e-05	0.615724	-0.000849485	3.01025e-06	0.00149999	1.00791e-09	0.0018813	6.43523e-08	0.000615323	0.232364	0.00119237	0.0146906	0.000311571	0.561603	0.00227935	0.000128662	-0.000912554	0.118099	1	0.691711
51082	PLA2G7	0.246996	1.56108e-104	0.00359401	0.023002	-0.00290872	2.06761e-50	-0.185857	0	-0.00106837	0	0.000480574	7.01881e-17	-0.000617345	1.55574e-08	-0.000569851	0.000109761	0.000105312	0.614752	-3.35801e-05	0.914581	0.000252284	0.391412	0.000286482	0.376945	0.000304155	0.396915	2.86184e-05	0.935145	1	0.691711
51631	CD40LG	-0.133526	1.64149e-06	0.00882274	0.0231772	0.00134534	0.00486429	0.0669818	7.31048e-18	-0.00046444	5.92204e-14	-0.000338622	0.0168955	0.00102085	0.000144926	0.00126247	0.000496302	-0.000462013	0.368737	0.00122724	0.110205	6.51569e-05	0.927964	-0.000176735	0.823714	0.00120795	0.170139	0.000516405	0.548837	1	0.691711
51518	GOLM2	-0.145438	8.49466e-68	0.00264212	0.0231784	0.00228419	3.60645e-57	0.0407917	2.07919e-68	0.000191986	2.57271e-25	-0.000570535	4.25157e-41	0.000890414	2.1725e-28	0.000234329	0.0311337	-0.000157682	0.306099	-0.000191454	0.406323	0.000428197	0.0481136	0.000277883	0.243617	-0.000486104	0.0653056	0.00025732	0.320635	1	0.691711
44480	SAA4	-0.025942	0.0192289	0.00350128	0.0231911	0.000959774	4.45681e-07	0.0200612	7.80634e-11	0.000187965	2.45595e-15	-0.000123697	0.0241092	3.10651e-05	0.7658	0.00012597	0.372061	-3.57637e-05	0.860281	-0.000173393	0.557371	0.000565905	0.0445412	9.75638e-05	0.753994	1.0506e-06	0.997585	-0.000361868	0.283488	1	0.691711
44300	PRND	-0.0414642	0.0237525	0.00574837	0.0242703	0.00146212	3.35816e-06	-0.00807518	0.113521	-0.000418553	2.3585e-26	-0.000119774	0.186545	0.00147513	1.26667e-17	0.00106589	4.77969e-06	0.000841705	0.012295	0.000852964	0.0805432	0.00113974	0.014286	3.52017e-05	0.945384	-0.000413892	0.471166	0.00146864	0.00847731	1	0.708787
44480	GC	0.0435297	2.01196e-06	-0.00287165	0.0242705	-0.000765439	1.10916e-06	0.0521075	1.76808e-92	-0.000362974	3.92085e-76	9.58169e-05	0.0345394	-0.000286189	0.000900446	0.00012577	0.280921	6.37899e-05	0.704061	-0.000355743	0.145266	-0.000115662	0.619339	-0.000482627	0.0607192	-0.00116409	4.98025e-05	-0.000355354	0.202573	1	0.708787
49871	SSB	0.138395	2.68995e-11	-0.00651086	0.0244911	-0.000983481	0.00576224	-0.00577688	0.318933	-9.32987e-06	0.838756	-1.56035e-05	0.882246	7.62801e-05	0.702752	-0.000208008	0.440099	-0.000175126	0.647839	-0.000146067	0.796968	-4.82451e-05	0.928627	4.72657e-05	0.936336	-0.000873545	0.183646	0.000202201	0.753616	1	0.708787
44409	SERPINE2	0.108633	2.25995e-06	0.00716644	0.024821	-0.00129311	0.00103208	0.0130425	0.0412224	-0.000237144	1.55735e-06	-5.39385e-06	0.962241	0.00138407	1.62338e-10	0.00184111	2.72816e-10	0.000622022	0.139643	0.000556701	0.367087	0.000120165	0.836432	-0.00112174	0.0814172	0.0010912	0.129017	0.000297844	0.670304	1	0.711292
51076	KITLG	-0.343979	1.24079e-143	-0.00416792	0.0260164	0.00527679	1.92695e-115	0.0317893	2.41084e-17	0.000622263	3.34144e-96	-6.9857e-05	0.307592	-0.00062152	1.67063e-06	7.07135e-05	0.68755	-0.00103077	3.22719e-05	-0.000334753	0.366888	-0.000730755	0.0365951	-0.000142567	0.710421	-0.000984245	0.0204081	0.00194155	3.33458e-06	1	0.718962
51350	CHGB	-0.709314	0	-0.00458936	0.0260244	0.0124012	0	0.00878235	0.0334376	-0.000659698	3.94598e-90	-1.24266e-05	0.869066	0.000258086	0.0709891	-0.000191158	0.321998	0.000631363	0.0207792	-0.00201932	7.55936e-07	-0.000988797	0.010115	-0.00103194	0.0146273	0.000113438	0.808094	0.000314803	0.493345	1	0.718962
42948	MANSC4	-0.74506	1.68179e-218	-0.00727473	0.0261584	0.0153778	0	-0.0564994	5.62163e-18	-0.000537281	1.01678e-26	-3.67258e-05	0.75095	0.000683131	0.00193283	0.00181294	1.20319e-09	-3.23174e-05	0.940262	-0.00133942	0.0304411	-0.000567973	0.340625	0.000361685	0.582008	0.00288757	8.39284e-05	-0.00042909	0.549013	1	0.718962
48920	GKN1	-0.272271	1.46611e-163	0.00307834	0.0265112	0.00418717	4.23994e-132	0.0342162	7.8632e-35	-0.000258029	5.71722e-32	-7.61389e-05	0.13003	-1.2537e-06	0.989521	-0.000221753	0.0860694	0.000697764	0.000145131	-0.000151026	0.576272	-0.000185256	0.472938	0.000520224	0.0663887	0.000370786	0.238541	-0.000312648	0.310683	1	0.718962
43602	ZNF75D	0.0963056	1.04711e-05	0.00673769	0.0265693	-0.0010202	0.00650179	0.0173062	0.0044182	-1.1213e-05	0.810592	3.56797e-05	0.741747	-0.000153569	0.456528	-0.000544825	0.0504823	1.06214e-06	0.997884	0.000546495	0.347558	-0.000685025	0.218123	-0.000222364	0.716953	-0.000833881	0.223018	-0.000433486	0.516973	1	0.718962
51207	FST	-0.799282	0	0.00557418	0.0267513	0.0135633	0	0.131142	2.80662e-148	-0.000355887	6.34725e-19	0.000252241	0.0060566	0.000971339	2.37218e-08	0.000414313	0.0783459	-0.00035582	0.285797	0.00177218	0.000389343	0.00108101	0.0214086	0.000409396	0.428098	0.000289209	0.61248	-0.0002777	0.619949	1	0.718962
44234	HRG	-0.295084	1.76174e-148	0.00349066	0.0268104	0.00456549	2.49586e-121	0.0571152	3.85589e-73	-7.19943e-05	0.00299659	-2.83702e-06	0.9596	0.000356961	0.000811546	0.000182798	0.205761	-0.000591332	0.00439257	-0.000283748	0.346626	0.000530004	0.0658375	-0.00012509	0.694172	-0.000752631	0.0338617	-0.000614068	0.0751358	1	0.718962
50925	NCR1	-0.333632	3.13633e-141	-0.00403082	0.0278788	0.00582711	2.41978e-146	0.0292987	1.53329e-15	-0.00127207	0	0.000491972	1.89488e-13	0.000506927	6.3062e-05	-0.000115165	0.502129	-0.000893245	0.00023629	-0.000773903	0.0321504	-0.000651293	0.056028	-0.000521455	0.164075	-0.000122929	0.767359	-5.55449e-05	0.891542	1	0.738542
42948	PMM2	0.191586	5.3958e-19	0.00658286	0.0280459	-0.00296588	9.38097e-16	0.0450742	5.27773e-14	0.000183131	6.79421e-05	-0.000300218	0.00462616	0.00115943	9.29429e-09	0.000919839	0.00075786	8.11284e-05	0.837294	0.00133792	0.0182824	0.000746038	0.171844	-0.000667266	0.267638	0.00042751	0.525004	0.00121149	0.0647754	1	0.738542
50999	MLN	-2.47723	0	-0.00969621	0.0286035	0.0448728	0	-0.104281	7.83246e-32	-0.00193554	1.50752e-164	-0.000704448	1.31807e-05	0.00136414	8.44929e-06	-0.000171551	0.679217	0.00248484	2.31732e-05	-0.00458674	1.5071e-07	0.000927166	0.260432	-0.00164245	0.0697307	0.00155389	0.121757	0.0025886	0.00857551	1	0.7465
44220	DUT	0.239727	7.708e-11	0.0111453	0.0295702	-0.00182951	0.00379097	-0.198429	3.9491e-83	0.000852881	3.9847e-27	-0.000938695	2.89437e-07	0.00322819	1.44593e-20	0.00209877	7.22432e-06	0.000921022	0.172645	0.00151745	0.122483	0.00342674	0.000247658	0.000313653	0.761741	0.00258821	0.0250343	0.0026981	0.0160532	1	0.748616
42948	ATP1B3	0.0799918	1.32251e-08	0.00426413	0.0296575	-0.000714217	0.00309643	0.020742	1.20303e-07	-8.93654e-05	0.00296929	0.000121823	0.0790323	0.000140521	0.287334	0.000113235	0.526311	-0.000156885	0.54391	7.19489e-05	0.84621	-0.000720922	0.0436115	-8.61961e-05	0.826767	0.000606888	0.167872	-0.000614402	0.152311	1	0.748616
49867	LYAR	-0.0379811	0.048251	-0.00582286	0.0299223	0.00183837	2.46965e-08	-0.0208383	0.000103703	2.66393e-05	0.530967	-1.11979e-05	0.908804	0.00032699	0.0776171	2.12977e-05	0.931898	-0.000669881	0.0594274	0.000896593	0.0889974	-0.000574303	0.24839	0.000359554	0.511786	-0.00220038	0.000300614	-0.00112571	0.0581836	1	0.748616
51631	ADA	-0.0301029	0.0175961	0.00383142	0.0303117	0.00205371	3.7601e-21	-0.0905738	1.77485e-143	0.000205137	3.17738e-13	-4.71916e-05	0.46454	0.000775423	2.30832e-10	0.000713967	1.51454e-05	-9.08168e-06	0.96904	0.00113434	0.00118258	0.00133654	4.63157e-05	0.000920862	0.0107806	5.18503e-05	0.897082	-0.000172309	0.660351	1	0.748616
43827	HPSE	0.0442319	0.186795	0.0100953	0.0303946	-0.00184014	0.00136814	0.0456942	9.68e-07	-0.000159362	0.0264265	-0.000762529	4.36567e-06	0.00246191	6.57183e-15	0.00232488	4.75752e-08	-0.00109105	0.0757959	0.000663709	0.461993	0.00163271	0.054535	-0.000465242	0.620988	0.00184168	0.0788178	0.00166674	0.102222	1	0.748616
50417	CREG1	-0.19503	1.9989e-44	0.00420341	0.0305528	0.0048502	2.99747e-91	-0.085606	9.65261e-107	-0.000349467	1.25631e-29	-0.000172637	0.0160556	0.000800436	3.49288e-09	0.000340688	0.0611224	-4.75569e-05	0.853338	0.000642449	0.0945982	0.00244224	1.49002e-11	-6.54891e-06	0.986852	-0.000229031	0.603198	0.000548674	0.204133	1	0.748616
49867	FES	-0.23191	2.10329e-42	-0.00510393	0.0311283	0.00482457	1.5462e-61	-0.026041	3.93391e-08	-0.000157952	2.58616e-05	-0.000196671	0.0226947	3.27817e-05	0.841184	0.000150319	0.494522	-0.00127746	4.67766e-05	-0.000196215	0.673349	-0.000399123	0.36358	-0.000311025	0.520373	1.67261e-05	0.975171	-0.000258052	0.622835	1	0.748616
51706	PDGFA	-0.172839	1.80422e-11	0.0077134	0.031442	0.00266779	1.45018e-09	0.00777978	0.278319	-0.00104512	5.41952e-75	-0.00036882	0.00491836	0.00140433	1.60823e-08	0.000860593	0.0103554	-9.33004e-05	0.844094	0.000129294	0.855434	0.000302867	0.650089	-0.00118023	0.108019	0.000597106	0.462381	0.000374711	0.638217	1	0.748616
43232	OXCT1	-0.1312	1.31417e-07	0.0074342	0.0315014	0.00296489	3.5927e-12	0.0279806	5.24003e-05	0.000445486	7.46844e-17	-6.68699e-05	0.588811	0.00160132	8.62336e-12	0.0014316	6.14128e-06	-0.000261922	0.565019	0.000565437	0.392425	0.000851482	0.176845	-0.000104211	0.881069	0.000740484	0.342695	0.00155184	0.040122	1	0.748616
51271	SCG2	-0.403337	9.45815e-262	-0.0034788	0.0315788	0.00708696	1.74003e-274	0.0120786	0.000193528	-0.000519225	2.23409e-90	-0.000357747	1.17238e-09	0.000468855	2.6259e-05	0.000178847	0.235993	0.000820777	0.00012729	-0.00113646	0.000371802	8.59172e-05	0.775084	-0.00138676	2.75312e-05	0.000299854	0.413603	-7.56717e-05	0.833043	1	0.748616
42978	ART5	0.196156	2.66154e-18	0.00672316	0.0315886	-0.00158236	4.02703e-05	0.0358622	9.86353e-09	-5.3387e-05	0.268192	3.24259e-05	0.770885	-0.000390171	0.065598	-0.000373517	0.190463	0.000362962	0.378905	-0.000482707	0.415416	3.85629e-05	0.946265	-0.000402239	0.52305	-0.00168194	0.0166269	0.000116552	0.865191	1	0.748616
50594	MASP1	-0.17334	1.52616e-92	0.00253133	0.032135	0.00314751	2.01008e-103	-0.0255075	4.58302e-27	7.61279e-06	0.685116	0.000339652	3.19578e-15	-0.000275622	0.000738629	-5.37873e-05	0.627431	0.000301928	0.0535156	0.00122552	1.30762e-07	0.000154381	0.483784	0.000235178	0.330138	-0.000607539	0.023377	-3.40665e-05	0.897125	1	0.748616
51421	WFDC12	-0.0753368	0.00107182	-0.00688507	0.0321686	0.0077351	4.16201e-85	-0.658068	0	-0.000213703	2.80811e-05	0.00082204	1.92599e-12	0.00187125	2.95139e-17	0.00175259	5.06873e-09	0.00161151	0.000150039	-0.00158539	0.0124538	-0.00285859	1.66545e-06	0.00040354	0.538796	-0.000683594	0.348232	0.00167845	0.0184296	1	0.748616
51082	CD164	-0.122273	1.51071e-37	0.00284518	0.0322702	0.00269128	1.14573e-60	-0.0205933	1.06082e-14	-0.00012217	7.0443e-09	0.000120533	0.0127304	0.000493705	7.42953e-08	0.000320811	0.00958047	-0.000153435	0.383017	0.000283326	0.281645	0.000173449	0.483309	2.6521e-05	0.922484	0.000133333	0.658639	0.000246761	0.403884	1	0.748616
51038	CD276	-0.703005	0	0.0037886	0.033041	0.0113968	0	0.0608862	2.00368e-65	-0.000438715	3.61574e-54	-9.38562e-05	0.148687	0.000881245	7.93343e-13	5.98124e-05	0.71869	-0.000174705	0.457927	-0.000119826	0.733813	0.00121006	0.00026418	0.000587159	0.107338	-0.000354758	0.378696	0.000151296	0.701943	1	0.753352
50509	SFRP1	-1.09583	0	0.00470508	0.0332	0.0188754	0	0.0658825	4.91017e-50	0.000716983	1.93631e-92	0.000589316	2.09611e-13	0.000752658	7.64586e-07	0.00114183	3.30552e-08	0.00142627	1.06916e-06	0.00138888	0.00136879	0.00144388	0.000457298	0.000491539	0.276062	-3.03503e-05	0.951713	-0.00069594	0.157378	1	0.753352
51228	PODXL2	0.219231	5.16879e-104	-0.00300039	0.0332475	-0.00388308	8.11757e-111	0.00772999	0.0061265	-7.10088e-05	0.00148136	-0.00054157	8.36724e-26	0.000435743	8.00968e-06	0.000345066	0.00870616	0.000150485	0.419535	-0.000584612	0.0364184	0.000199837	0.445411	-0.000547439	0.057548	0.00101322	0.00150007	3.45766e-05	0.911988	1	0.753352
50836	GPA33	-0.297347	6.20865e-10	-0.0141466	0.0346811	0.000844099	0.305834	0.500146	5.31588e-300	5.11407e-05	0.630312	-0.000846378	0.00052856	-0.00350983	3.64618e-14	-0.00275342	1.03502e-05	-0.0035418	6.56679e-05	0.000660673	0.624867	-0.00463902	0.000190409	-0.00223639	0.103994	-0.0060986	6.05868e-05	-0.00370709	0.0127937	1	0.779791
51082	CNTN4	-0.299561	4.07229e-264	0.00251319	0.0354187	0.00455825	5.51666e-209	0.0744586	2.0396e-210	-0.000176404	1.45492e-20	-2.90896e-05	0.503653	0.000261093	0.00154997	-8.34912e-05	0.453303	-0.000707919	7.59561e-06	4.36761e-05	0.853542	-0.000133861	0.547353	-0.000268587	0.273048	-4.35098e-05	0.872603	8.50499e-05	0.748975	1	0.780762
42948	NOS2	-0.0386615	0.00643162	0.00415705	0.0354772	0.00146274	1.87716e-09	-0.0470176	1.28456e-32	4.15888e-05	0.170232	-5.92738e-05	0.396635	0.000211551	0.112098	0.000603598	0.00080786	0.00116579	7.71761e-06	1.17944e-05	0.974841	0.000278472	0.439446	4.13205e-05	0.91712	-7.48645e-05	0.865997	0.000177321	0.681969	1	0.780762
43195	SCT	-0.135802	1.37332e-16	-0.00479331	0.0356984	0.00278446	5.03791e-23	-0.00810694	0.0757811	-0.000849766	7.64829e-128	0.000110142	0.174889	-0.000482834	0.00178162	-0.0009046	1.47277e-05	-0.00202822	1.55448e-11	-0.00132861	0.00219046	-0.000589037	0.157653	-0.00188434	4.03708e-05	-0.0014411	0.00495332	0.00038742	0.438675	1	0.780762
50116	PNPT1	1.40682	5.66939e-240	0.0123538	0.0359554	-0.0195107	3.07115e-158	0.119594	4.10325e-24	-0.00137906	7.80261e-49	0.000569052	0.00824928	-0.000518173	0.204054	8.90176e-05	0.871232	-0.00363068	3.26123e-06	-0.000552242	0.632593	0.000558643	0.609709	0.00146546	0.223835	-0.00536995	5.96064e-05	-0.000169995	0.896521	1	0.780762
51505	CLMP	-0.607687	0	-0.00236947	0.0368245	0.00931826	0	0.15202	0	-0.000536786	3.25931e-193	5.08981e-05	0.217352	0.000955918	2.77316e-34	0.000800905	3.93874e-14	0.000313938	0.0365207	-0.000111016	0.620473	0.000374778	0.0754035	-0.000415863	0.0730065	-0.00060963	0.0178222	0.000297073	0.237629	1	0.780762
50678	RSPO1	-0.552463	0	0.00364091	0.0368566	0.00940549	0	0.0493242	3.59672e-45	-0.000666947	3.28638e-127	0.000357654	1.72644e-08	0.000179952	0.13473	0.000933033	1.10595e-08	0.000616329	0.00757979	0.000484009	0.158214	-0.000222259	0.494466	0.0002993	0.401266	0.000400026	0.312151	-0.000104932	0.787216	1	0.780762
44409	SRPX	-1.04611	0	0.00365489	0.0368621	0.0169009	0	0.140136	0	7.66575e-05	0.00462412	8.97135e-05	0.151008	-0.000131098	0.269324	-0.000550324	0.000577123	-0.000950634	3.84478e-05	-0.000286474	0.39731	-0.000482785	0.130352	0.00100117	0.00456585	-0.000428502	0.276987	0.000253721	0.508365	1	0.780762
44414	KLK3	0.961297	7.49218e-204	0.00911075	0.0369177	0.0190107	2.61071e-269	-2.59346	0	8.01142e-05	0.233343	-4.35793e-05	0.779238	-0.000878336	0.00297635	-0.00114242	0.00416482	-0.000490894	0.394055	2.66996e-05	0.974524	-0.00107364	0.177251	-0.000775007	0.37824	-0.00176719	0.0721136	-0.00151225	0.113297	1	0.780762
49787	GFAP	-1.54792	0	-0.00478679	0.0378254	0.0262156	0	0.154445	5.33031e-243	0.000158045	1.53846e-05	-0.000155875	0.0636895	0.000294565	0.0644435	0.00069653	0.00115146	0.000130874	0.668286	5.20643e-05	0.908464	0.000132301	0.757014	0.000501186	0.287189	-0.000531261	0.309733	1.33472e-05	0.97915	1	0.780762
51228	ERBB2	-0.115825	2.24023e-36	0.00265695	0.0382417	0.00351138	1.68043e-109	-0.153694	0	0.000176456	4.02272e-18	-9.51284e-05	0.0424791	0.000843373	2.20036e-21	0.00124075	3.66329e-25	0.000386546	0.0226684	0.000611519	0.0161537	0.000655537	0.00593742	0.000301714	0.249964	0.00021509	0.458837	2.41568e-05	0.93236	1	0.780762
50999	PROK1	1.88241	0	-0.00636456	0.0383725	-0.0224819	0	-1.20574	0	0.00108744	7.48195e-109	0.000663191	3.38783e-09	0.0012043	1.45911e-08	0.000758928	0.0083725	-0.00151172	0.000206577	0.000184608	0.760602	-0.00119457	0.0366392	-0.000262269	0.676373	-0.000309832	0.65653	0.000122058	0.858219	1	0.780762
42948	SLC51B	-0.112737	2.86397e-05	-0.00777391	0.0383753	0.00313883	1.13128e-11	0.167749	3.83015e-110	7.72602e-05	0.179709	0.000285703	0.0314397	-0.00176818	2.72634e-12	-0.00190143	2.74963e-08	-0.0027425	3.01309e-08	0.000747619	0.292479	-0.00209403	0.00220369	-0.000740728	0.325933	-0.00329838	9.0535e-05	-2.79159e-05	0.9729	1	0.780762
51082	ITGA5	-0.400402	0	0.00269911	0.0387973	0.00701027	0	0.018311	2.66497e-12	-0.000118188	1.21061e-08	-9.76249e-05	0.0400974	0.000579163	1.35573e-10	0.000204927	0.0922719	0.00119098	5.69567e-12	6.5378e-05	0.800469	0.000907899	0.00018952	8.17474e-05	0.760268	7.53944e-05	0.799383	-0.000117887	0.684976	1	0.780762
50678	ADAM22	-0.329164	5.6788e-149	-0.00363249	0.0388858	0.00599565	1.37486e-167	-0.0228512	8.85111e-11	-0.000820323	8.64135e-188	-0.000656008	1.16729e-24	0.00135244	7.84568e-29	0.000199865	0.224734	-0.00110692	1.97554e-06	-0.00015652	0.650854	0.000988062	0.00259373	-0.00017379	0.628831	-0.000586522	0.141635	0.000309552	0.429681	1	0.780762
44329	RTN4IP1	0.189566	6.02341e-09	0.00935326	0.0389379	-0.00243541	1.31994e-05	-0.0591115	7.04584e-11	0.000548465	4.42487e-15	-0.000555968	0.000558639	0.00262636	1.09843e-17	0.00152124	0.000241477	4.78695e-06	0.99361	0.00142342	0.100708	0.00210862	0.010805	-0.000403663	0.658259	0.00223556	0.0283725	0.00146131	0.140606	1	0.780762
43195	LYSMD3	0.361182	5.64345e-23	0.010493	0.038998	-0.00458761	2.65991e-13	0.0871228	1.09166e-17	-0.000751744	9.684e-22	-0.000135242	0.454535	0.000412428	0.23083	7.62928e-05	0.869675	-0.00269621	5.70187e-05	-0.00171196	0.0763862	-0.00134476	0.147544	-0.00011091	0.913604	-0.0020721	0.0696749	-0.000186296	0.867222	1	0.780762
44409	TOMM20	-0.238674	5.92456e-18	0.00789203	0.0399285	0.00652355	5.18669e-43	-0.0728309	2.76378e-21	0.000326226	3.94679e-08	-0.000678558	7.41082e-07	0.00177643	9.02762e-12	0.00139605	6.88524e-05	-0.0002142	0.6724	0.000304567	0.681656	0.00128055	0.0674052	0.000266418	0.730812	0.00205892	0.0172661	0.00122513	0.145464	1	0.793596
51279	AOC3	-0.614388	0	0.00307429	0.0404332	0.00968799	0	0.113482	3.22249e-308	-0.000444022	3.28165e-77	-0.000402756	2.29796e-13	9.78253e-05	0.346914	-0.000368073	0.00894843	0.00110114	2.94504e-08	0.000708584	0.0167451	9.50305e-05	0.734337	0.00088141	0.00410694	0.000480485	0.157245	-0.000394431	0.237066	1	0.793596
50116	GBP2	-0.240934	1.43315e-29	0.00608339	0.0404901	0.00374575	1.34044e-24	0.0517246	3.59382e-18	0.000222994	2.41318e-06	-9.59614e-05	0.376875	0.000768086	0.00018836	0.0010032	0.000290907	-0.000435193	0.268479	0.000111184	0.848584	-0.00050599	0.359062	-1.56226e-05	0.979479	-0.000543528	0.420226	7.88e-05	0.904812	1	0.793596
50038	IL17A	-0.0868013	1.61747e-08	0.00437782	0.0407251	0.00244968	1.49574e-20	-0.00271423	0.526636	0.000143884	2.38237e-05	4.29953e-05	0.582384	0.000349378	0.0183135	0.000156403	0.43275	0.00150946	1.00482e-07	8.59987e-05	0.83753	0.000609566	0.125079	0.00123817	0.00466587	0.00075228	0.121639	-0.000110494	0.815881	1	0.793596
49871	DCTN6	0.171158	2.24879e-11	0.00726065	0.0417269	-0.00112243	0.0105277	-0.0172019	0.015993	-0.000150774	0.00760043	-0.000203877	0.116166	0.00078834	0.00136791	4.45585e-06	0.989289	-0.00179853	0.000140266	3.28096e-05	0.962584	0.00145689	0.0281138	-0.000398724	0.584388	0.000671513	0.406698	0.00112115	0.157727	1	0.801887
50949	CCL14	-0.513028	1.79079e-279	0.00403684	0.0423917	0.00834181	9.07787e-252	0.0891552	1.90537e-110	0.000455941	3.28831e-47	0.00156094	1.79958e-101	0.000391509	0.00450909	0.000207286	0.266648	-6.57735e-05	0.802891	0.000299462	0.444739	0.000427085	0.249974	0.000615077	0.130461	0.000641708	0.154224	0.000487907	0.269991	1	0.801887
49867	MAP3K5	0.177778	7.51731e-07	-0.0101546	0.0427214	-0.000717798	0.243908	-0.0416622	3.27318e-05	0.000294223	0.000212828	-0.000911437	6.0611e-07	0.00157456	5.42911e-06	-0.000493393	0.289349	-0.00522382	3.69163e-15	0.000994577	0.312635	0.000441529	0.634824	-0.00111314	0.277019	0.000689766	0.544182	-0.00069252	0.532819	1	0.801887
50836	PSMD9	0.105241	1.9699e-07	0.00571151	0.0427363	0.000638269	0.0657792	-0.152079	1.25634e-158	0.00021048	2.52037e-06	-0.000289913	0.00478617	0.000434334	0.0259152	0.000265627	0.312023	0.000522902	0.161393	0.000972462	0.087225	0.000679251	0.194161	0.00128176	0.0268162	-0.00314	9.26879e-07	4.55573e-05	0.942044	1	0.801887
51706	DKK3	-0.716271	0	-0.00299638	0.0427889	0.0127323	0	0.00516883	0.0808412	0.000360597	4.73366e-53	-0.000553863	1.42508e-24	-0.00033364	0.00113899	-0.000688107	6.7564e-07	0.000501247	0.0104424	0.000449762	0.124504	-0.000135881	0.621787	-0.000432119	0.153783	0.000245885	0.463215	-0.000112398	0.732457	1	0.801887
43581	QSOX1	-0.181874	5.13431e-35	0.00413938	0.0433382	0.00408206	1.21499e-58	-0.0381472	1.3058e-20	1.67595e-05	0.595149	0.000125492	0.084504	0.000410594	0.0030248	0.000704908	0.000172676	0.00013644	0.612839	-7.83241e-05	0.840842	0.000581588	0.120537	0.000286454	0.487991	-6.37485e-05	0.889813	-0.000786636	0.0793836	1	0.801887
50997	GGT1	-0.102785	2.71256e-08	0.00518388	0.0441093	0.00699345	2.2614e-107	-0.410204	0	0.000806975	2.31961e-86	0.00046538	7.22446e-07	-0.000137358	0.440179	0.00166848	3.5069e-12	0.00248767	2.97784e-13	0.000882247	0.0835738	-0.000232512	0.627808	-6.49649e-05	0.902157	0.000643627	0.271005	-0.00062333	0.276408	1	0.801887
50678	MDGA1	-0.66678	3.64416e-157	0.00697523	0.0442094	0.00740338	3.06484e-67	0.34699	0	-0.0011856	2.80936e-102	0.000462307	0.00024558	-0.000568638	0.0174039	-0.00334798	6.21666e-25	-0.000424435	0.354827	-4.5799e-05	0.946435	-6.38096e-05	0.92138	0.000325406	0.646111	-0.00240627	0.00222103	-0.00057825	0.454194	1	0.801887
51706	DPT	-0.939804	0	-0.00279432	0.0446844	0.0161152	0	-0.000901329	0.746297	0.000287069	1.70784e-38	0.000353472	3.88385e-12	0.000865547	3.04077e-19	0.00054719	2.68508e-05	-2.87548e-05	0.875937	-0.000549203	0.046221	4.75049e-05	0.854578	0.000159593	0.575616	-0.000437819	0.165119	0.000555185	0.0727416	1	0.801887
42820	DCLRE1C	0.0219857	0.0481787	0.00310389	0.0448806	-0.000291226	0.127088	0.00586599	0.0581518	-3.83532e-05	0.10643	8.6784e-06	0.873721	7.59278e-05	0.465311	-0.000102557	0.467648	-6.37207e-05	0.754775	0.000141207	0.630526	0.000100801	0.721301	6.72262e-05	0.829011	-0.000277673	0.425237	0.000348997	0.304261	1	0.801887
44448	LCAT	-0.155186	2.01499e-78	-0.00228671	0.0464762	0.00235013	1.36881e-61	0.0206982	2.1488e-19	0.000300126	5.56694e-64	-0.000261255	1.83286e-10	0.000443416	1.23215e-08	0.000354474	0.000751379	-0.000171801	0.256412	-7.15046e-05	0.745184	0.000140361	0.50326	-0.000306333	0.185582	-0.000790598	0.00221537	-1.25389e-05	0.960253	1	0.801887
51622	PLA2G1B	-0.1787	2.34395e-30	-0.00432697	0.046578	0.00148754	2.68285e-08	0.168405	0	0.000318047	3.53609e-20	-0.000365225	4.58355e-06	0.000866256	9.66093e-09	-0.000787086	0.000111305	-0.00114338	7.09631e-05	-0.000673503	0.11747	-0.00192938	1.92014e-06	-0.00100303	0.0243311	-0.000323452	0.51172	0.000219463	0.650025	1	0.801887
43232	LIPF	-0.780996	7.27085e-277	-0.00602932	0.0467591	0.0131241	4.74217e-266	0.112907	5.55903e-77	0.000152189	0.00115847	0.000144998	0.181477	-0.00135641	4.29832e-11	-0.000327573	0.238174	0.0020954	1.5464e-07	4.27804e-05	0.941197	6.56353e-05	0.905528	0.000376314	0.537957	-0.00114275	0.0950537	-0.00056257	0.396294	1	0.801887
51190	F3	-0.693058	0	-0.00269735	0.0468007	0.01223	0	0.0115348	2.174e-05	0.000188232	2.77041e-18	0.000303896	6.81539e-10	-0.000446923	1.69695e-06	-0.000210452	0.0958027	-0.000754116	2.67929e-05	0.000330538	0.216471	-0.000520798	0.0384292	0.000626129	0.0237765	-0.0009067	0.00320485	-0.000109637	0.715088	1	0.801887
42978	DEFB104A_DEFB104B	0.525624	3.03136e-153	0.00549304	0.0468037	-0.00438737	6.16597e-38	-0.338985	0	-0.000688636	1.27804e-58	9.61028e-05	0.328566	-0.000388769	0.0378341	0.000364928	0.147641	-0.000132638	0.715866	-0.000366192	0.484327	-0.000470707	0.35173	-0.000985279	0.0765939	-0.00029125	0.63875	0.00022126	0.715244	1	0.801887
43120	CD3G	0.328149	9.90852e-25	0.00878056	0.0484258	-0.00180238	0.00100469	0.0284142	0.00139906	-6.7089e-05	0.3272	9.64516e-05	0.543375	0.000135568	0.652767	2.83602e-05	0.944404	-4.05714e-05	0.944793	-0.00146805	0.082618	0.000265989	0.743148	-0.00103698	0.246773	-0.000859997	0.389848	0.0001346	0.890257	1	0.801887
43037	CD7	0.0211743	0.1712	-0.00424756	0.0487132	-0.00127611	1.53492e-06	0.124498	6.85799e-182	-0.00016581	5.87549e-07	0.000241343	0.00172874	0.000727344	6.51359e-07	-0.000395934	0.0443248	5.64923e-05	0.842221	-0.000815144	0.0464968	-0.000843843	0.0317954	-0.0011299	0.00914751	0.000647655	0.181192	-5.27538e-05	0.911115	1	0.801887
42948	PYY	-0.757815	4.52411e-102	-0.00966885	0.048901	0.0171935	2.61277e-176	-0.190538	1.12459e-83	-0.00161838	6.64737e-102	6.93607e-05	0.689598	0.00200114	1.44323e-09	0.000854949	0.056033	0.00162373	0.0121161	-0.00257925	0.00548726	-0.00180951	0.043088	-0.00307932	0.00179325	0.00157511	0.152842	0.000713641	0.506649	1	0.801887
50594	LAYN	-0.898092	0	-0.00332189	0.0499221	0.0153292	0	0.0901956	1.4123e-154	-0.000828168	7.76618e-206	-0.00037129	1.86403e-09	0.0006405	4.55822e-08	5.20361e-06	0.973883	0.000464743	0.0382508	-0.000641276	0.0541259	-0.000407945	0.197003	-0.000251641	0.467504	-0.000237076	0.537307	0.000916359	0.0153125	1	0.801887
44201	EDDM3B	1.08209	0	0.00497807	0.0500648	-0.00161424	2.65485e-07	-1.42584	0	-5.89499e-05	0.132226	0.000465519	2.65583e-07	0.000580704	0.000732325	0.000141052	0.544191	6.23684e-05	0.85242	-0.000762696	0.117118	0.00105727	0.0229671	-0.000684746	0.182343	0.000552123	0.335173	0.000359718	0.51807	1	0.801887
50510	PTPRN2	-0.208052	1.15178e-68	-0.00321992	0.0513977	0.00319366	2.18295e-55	0.051844	3.78801e-55	-0.000222049	2.80696e-17	-0.000234209	0.000100758	0.00074698	6.13765e-11	0.000689818	8.54399e-06	0.00194274	6.90167e-19	-0.000704048	0.0300929	9.61902e-05	0.755114	-0.000807309	0.0168366	-0.000225556	0.547482	-0.00022818	0.535681	1	0.801887
43232	MECR	0.112745	0.000567042	0.00885969	0.0514016	-0.000532399	0.342549	-0.0788712	4.61307e-18	0.000524187	8.72779e-14	-0.000850853	1.72304e-07	0.00239959	7.48527e-15	0.00201909	1.25466e-06	0.000119744	0.841526	0.00143048	0.10008	0.0014545	0.0795251	-0.000143949	0.875184	0.002534	0.0135907	0.002465	0.013213	1	0.801887
51621	TNFSF13B	-0.314469	3.25487e-212	0.00273397	0.0514382	0.00435901	8.16988e-140	0.155676	0	-0.000137211	7.59641e-10	4.57162e-05	0.373617	0.000258292	0.00799048	3.28371e-05	0.80289	0.000556037	0.00276716	-9.4667e-05	0.733234	0.000164633	0.529264	-0.00013168	0.646979	0.000118274	0.709979	-0.000305244	0.328497	1	0.801887
51122	SPON1	-0.887404	0	0.00317584	0.0514529	0.0149356	0	0.0897044	6.89825e-165	0.000294393	7.9136e-30	0.000270368	5.67851e-06	0.000817136	4.34444e-13	0.000369225	0.0154404	0.000205347	0.341751	-0.000130984	0.685602	6.6843e-05	0.826258	0.000390994	0.242826	-0.000541472	0.143301	0.000885755	0.0146116	1	0.801887
43232	ANP32C	0.0941356	7.8945e-11	-0.00391749	0.0515812	-0.000677655	0.00633358	0.0163735	4.79727e-05	-9.29683e-05	0.00278708	4.49783e-05	0.532289	-4.16276e-05	0.760404	-0.000127232	0.490011	2.93986e-05	0.911671	-0.000298501	0.438055	-0.000277575	0.449525	-0.000300592	0.458547	-0.000791925	0.0813391	0.000359132	0.41457	1	0.801887
50999	PSPN	1.45823	0	0.00942848	0.0518202	-0.00657418	3.13244e-28	-2.10672	0	-0.000561671	3.52562e-13	-0.00152968	5.54285e-18	0.00264794	2.87357e-15	-0.000738245	0.103985	-0.00131762	0.0403332	0.00112462	0.239363	0.00197697	0.0283595	0.00233463	0.0185091	-0.00184101	0.093936	-0.00355737	0.000966296	1	0.801887
42820	CEP152	0.00763915	0.61428	-0.00409773	0.0519086	0.000287575	0.268741	0.00169847	0.687167	-8.62905e-05	0.00766652	-4.98221e-05	0.50298	0.000475892	0.000781727	-4.52426e-05	0.814045	-1.91807e-05	0.944973	-0.00030677	0.443031	0.000317035	0.410159	0.00059137	0.163124	-0.000559382	0.238321	0.000181886	0.694284	1	0.801887
42948	ECI2	0.0834903	0.000160508	0.00598994	0.0519562	0.000373869	0.324541	-0.0179552	0.00355251	7.49636e-05	0.112835	-0.000262549	0.0160337	0.00153122	1.65601e-13	0.000312921	0.265262	-0.000789806	0.0519149	0.00117027	0.0447448	0.000472182	0.400439	0.000427962	0.489379	-0.000260932	0.705997	0.000167342	0.804101	1	0.801887
51518	CD74	-0.784101	0	-0.00341677	0.0520311	0.0146885	0	-0.0527011	1.59701e-50	-0.000308413	2.18105e-28	-0.000405949	2.52396e-10	0.00156059	1.38118e-37	1.12519e-05	0.9454	0.00157077	1.53393e-11	-6.97578e-05	0.841323	0.000897665	0.00611569	0.00153079	2.13895e-05	0.000356794	0.370683	0.000640928	0.101661	1	0.801887
44448	SHBG	-0.543169	1.47892e-168	0.00527508	0.0521993	0.00528118	9.12111e-56	0.456227	0	-0.000267502	1.87586e-10	0.000906001	9.44085e-21	-0.00128127	3.51042e-12	-0.000624445	0.0120876	-0.00033368	0.351463	-0.000603092	0.246592	-0.000904085	0.0683871	-0.000427849	0.434493	0.000756326	0.21596	-0.00114557	0.054284	1	0.801887
44329	HNRNPUL1	-0.113979	1.56452e-10	0.00480539	0.0522256	0.00413258	1.26008e-41	-0.127788	1.12373e-145	0.000272398	1.0199e-12	-0.000299835	0.000660028	0.00117186	2.69574e-12	0.000736643	0.00114156	-0.000408515	0.211021	0.000631795	0.182462	0.000501729	0.267052	0.000550526	0.269644	-0.00124795	0.0251401	-0.000711154	0.189437	1	0.801887
50999	PTH1R	-0.188988	1.06645e-44	0.00364015	0.0524659	0.0040478	1.26748e-68	0.0198345	1.34185e-07	-0.000263952	1.07569e-18	-0.000169252	0.0134887	0.000289408	0.0257572	-0.000595142	0.000710812	-0.000541424	0.0295409	-0.000744349	0.0442738	-7.8941e-05	0.821108	-0.000681414	0.0757824	0.000218359	0.607831	0.000414067	0.321069	1	0.801887
43602	NEK7	0.179124	1.40966e-11	0.00714605	0.0524756	-0.00124104	0.00634964	-0.00277736	0.706437	-0.000167385	0.00318468	-0.000213196	0.104516	0.000646154	0.00980318	-0.000617245	0.0677327	-0.00286473	3.73963e-09	0.000133196	0.850293	-0.000673526	0.318154	-0.00144236	0.052545	0.00182419	0.0279786	0.000522794	0.519378	1	0.801887
51082	PIK3IP1	-0.674527	0	-0.00262182	0.0529069	0.0125929	0	-0.0420807	4.25698e-54	-0.000720646	1.39493e-243	-2.54922e-05	0.605198	0.000965928	5.4945e-25	0.000234641	0.0630289	-5.14452e-05	0.774141	-0.000589411	0.0279944	6.25034e-05	0.804265	-0.000210909	0.447736	0.000219327	0.475851	0.000410288	0.17332	1	0.801887
44245	SOX2	-0.0105747	0.205034	-0.00223335	0.0540834	0.000143418	0.316283	0.00121662	0.600081	-1.23056e-05	0.491629	-7.99676e-06	0.846181	-4.32789e-05	0.581137	-0.000126897	0.231281	0.000240716	0.115653	0.000270341	0.223054	-2.12853e-05	0.919906	0.000198029	0.396581	0.000128702	0.621939	-9.49592e-05	0.708444	1	0.801887
44329	GOLGA3	-0.0330253	0.235316	0.0074506	0.0540869	0.0022662	2.06069e-06	-0.0329833	2.03808e-05	9.76927e-06	0.870018	-0.000385777	0.00504462	0.00115997	9.41288e-06	0.000730031	0.0390958	-0.00171347	0.000787757	-2.05295e-05	0.977883	0.000623087	0.377748	-0.000733209	0.34679	-5.94813e-05	0.945545	0.000192663	0.82003	1	0.801887
50836	CES2	-0.28435	1.2045e-45	-0.0053713	0.0543289	0.00791176	9.1777e-117	-0.183266	4.21004e-233	0.000599275	1.18402e-41	-0.000875937	7.69531e-18	0.00151857	3.78417e-15	0.000520103	0.0456253	0.000476459	0.197575	-9.17583e-05	0.870558	-0.00048456	0.349646	-0.000239965	0.675516	-0.000125736	0.842718	-0.000492113	0.427785	1	0.801887
51039	CCN2	-0.373077	4.38272e-74	0.00548001	0.0545743	0.00672776	1.05242e-81	0.00677475	0.235552	-0.00046501	1.21569e-24	0.000497423	1.80944e-06	0.00144124	2.80399e-13	0.00163575	8.57257e-10	-0.000780673	0.0387279	0.000736284	0.192881	-0.000830084	0.118891	-0.00111139	0.0574801	0.000872	0.177335	0.000727824	0.251614	1	0.801887
50831	THOP1	0.0971558	3.06487e-17	0.00307216	0.0553061	0.000293524	0.136769	-0.16925	0	0.000187777	2.01378e-13	-0.000535782	6.12437e-20	0.000576933	2.01086e-07	0.000176838	0.239922	0.000161587	0.446614	0.000721711	0.0228318	0.000464256	0.121057	0.000993398	0.00248947	-4.73725e-05	0.896376	0.000350812	0.326933	1	0.801887
44409	SCRG1	-0.772076	0	-0.00260341	0.0553402	0.0152912	0	-0.153984	0	-1.65228e-06	0.93729	4.05949e-05	0.402346	0.00046909	3.51873e-07	-5.26579e-05	0.671193	-0.00100821	1.84023e-08	0.000138381	0.598223	-0.000698006	0.00482311	0.000235033	0.390813	-0.000186785	0.541374	0.00106011	0.000369055	1	0.801887
44409	TCTN3	0.0700839	7.54709e-11	0.00286552	0.0555007	5.82257e-05	0.752499	-0.129732	0	-0.000264226	3.52111e-30	-5.55995e-05	0.297704	0.000209649	0.0387331	0.00146734	7.1089e-27	0.000135065	0.493684	0.000880619	0.00233061	0.000807389	0.00307504	-0.00022092	0.463953	0.00131297	9.72055e-05	-0.000253414	0.439532	1	0.801887
43120	UNC5D	-0.0941605	7.25946e-23	-0.00254332	0.0561219	0.00133067	5.0097e-16	0.0516606	1.46058e-83	-4.32932e-05	0.034644	-0.000217316	4.77331e-06	0.00025654	0.00444606	0.00021096	0.0830568	-0.000173677	0.321953	-0.000527468	0.0371867	0.00043821	0.0712661	-0.000551853	0.0394514	-0.000136326	0.648787	-9.07331e-05	0.755971	1	0.801887
42948	NAA10	0.00469878	0.79596	0.00482964	0.0564593	-5.6895e-05	0.855195	-0.000537035	0.915465	-1.22501e-05	0.752456	-0.00011925	0.183042	0.000607417	0.000368675	0.000155129	0.501413	-0.0019985	2.149e-09	0.000434449	0.364414	0.000196048	0.670865	-8.16652e-06	0.987188	0.000800131	0.159109	0.000688387	0.214225	1	0.801887
51072	MDK	-0.625309	8.13397e-252	0.0048769	0.0566703	0.0116446	4.74412e-296	0.0194744	0.000143602	-0.000533349	1.77892e-39	-0.000481154	2.67528e-07	0.00201478	5.97204e-30	0.00123782	2.17551e-07	0.000631622	0.0621278	-9.42181e-05	0.852564	-0.000312285	0.511488	-0.00115924	0.0268205	0.00165455	0.00428998	0.000765013	0.177854	1	0.801887
43195	CASC3	0.0607954	5.7404e-05	0.00399875	0.0568853	3.35729e-05	0.896927	-0.035501	2.98401e-17	7.4866e-05	0.0208512	-0.000360407	1.40881e-06	0.000918567	1.05768e-10	0.000665312	0.000533829	-0.00101348	0.000250022	0.000605441	0.129267	6.03286e-07	0.998745	0.00025631	0.543908	-0.000114024	0.809061	0.000378909	0.410437	1	0.801887
51000	SOST	-0.738705	0	0.0037078	0.0574804	0.0151022	0	-0.225988	0	-0.000358739	9.15335e-31	-0.00101078	1.67291e-45	0.000956475	1.49406e-12	0.00154184	4.00321e-17	-0.00146101	1.58611e-08	-0.000941215	0.0148798	0.00012732	0.726682	0.000109023	0.78523	0.000706625	0.110417	0.00220245	4.15695e-07	1	0.801887
44201	MTSS2	0.211152	2.74091e-09	0.00934863	0.058101	-0.00272954	7.41124e-06	-0.0873392	9.63476e-19	0.000167163	0.0279305	-0.000680839	0.000106056	0.00163293	1.00784e-06	0.000603103	0.181743	-0.00252331	0.000106372	-0.000298556	0.75209	3.14786e-05	0.972186	-0.00245442	0.0138338	4.22915e-05	0.969675	0.000610638	0.57207	1	0.801887
42978	LELP1	0.126532	1.14731e-06	-0.00685036	0.058422	-0.00130175	0.00351437	0.00913904	0.206726	-6.31992e-05	0.2574	-6.44572e-05	0.616937	-0.00034703	0.157074	0.000298608	0.365798	0.000367932	0.440879	-0.000438678	0.522494	0.000626459	0.344129	3.41809e-05	0.962599	-0.000446202	0.583018	0.00038619	0.626927	1	0.801887
51228	SPARC	-0.184403	3.21176e-13	0.0066763	0.0586551	0.00218987	4.5088e-07	-0.0431309	1.04213e-09	-0.000679546	7.23293e-34	-0.000113367	0.379979	0.00133888	4.37301e-08	0.0018631	1.5828e-08	-0.000668369	0.152465	0.000989162	0.157697	0.000336453	0.608123	-0.00146325	0.0427734	0.00126308	0.114216	9.13768e-05	0.907193	1	0.801887
42948	THRAP3	0.599181	4.86418e-50	0.0105936	0.0587907	-0.00515947	7.87629e-14	0.121229	2.91265e-27	-0.000869737	5.07975e-24	0.000136591	0.490934	-0.000527637	0.162281	8.31898e-05	0.87065	0.000835635	0.258163	-0.000164923	0.876417	0.000271119	0.790671	-0.000819604	0.466682	0.000274054	0.827559	0.000875103	0.475752	1	0.801887
44409	ACADSB	-0.00796401	0.800874	0.00829134	0.0589145	0.0018299	0.000729525	-0.0302866	0.000564433	0.000497124	2.40098e-13	-0.000546588	0.000483617	0.00158914	9.27531e-08	0.000502287	0.210106	-0.000158314	0.784474	0.000848755	0.317144	0.000438665	0.583501	0.000401086	0.650366	6.31077e-05	0.949077	0.00122689	0.202049	1	0.801887
51082	WARS	-0.388237	5.7985e-179	0.0035661	0.0589542	0.00691228	1.08449e-192	-0.0198336	1.59494e-07	8.2304e-05	0.00604526	-0.000147256	0.0322026	0.000645236	7.47015e-07	0.000449036	0.0107166	-7.28466e-05	0.770694	0.000912563	0.0146745	0.000382649	0.276459	0.000575503	0.137293	0.000998488	0.0198998	0.000426037	0.310496	1	0.801887
42948	TMED10	0.136163	6.86278e-15	0.00459414	0.0592591	-0.00147156	9.28494e-07	0.0329549	1.29072e-11	-0.000134442	0.00032043	8.23956e-05	0.338886	-1.0874e-05	0.947149	2.98088e-05	0.893171	-0.000289662	0.366981	5.34925e-05	0.907577	-0.00014659	0.741152	0.000957723	0.0502746	1.17326e-05	0.982875	0.000295767	0.579056	1	0.801887
44329	CDK5RAP3	0.289822	2.26422e-43	0.00549476	0.0593753	-0.0036886	1.16922e-24	0.0218234	0.000182742	-0.000181234	5.60672e-05	-9.95085e-05	0.337018	0.000614936	0.00182446	0.000470361	0.0776714	-0.00145583	0.000153283	-0.000118152	0.832286	0.000433873	0.414955	0.000304972	0.603479	-0.000554691	0.397885	0.00106686	0.0945094	1	0.801887
44220	PCYT2	0.0508491	0.0606409	0.00710414	0.0594304	-0.000502603	0.279692	-0.0426715	1.54418e-08	-6.60028e-05	0.256254	-0.000450798	0.000811456	0.00172936	1.28176e-11	0.000513239	0.135834	-0.00133793	0.00709217	0.000622276	0.389338	0.00141006	0.0403982	-0.000908112	0.232829	0.000425681	0.616416	0.000291031	0.724093	1	0.801887
44409	DTYMK	-0.0527374	0.0331455	0.00647167	0.0600366	0.00261517	7.3978e-10	-0.155609	1.89913e-112	-5.59589e-06	0.91622	-0.000670223	4.82818e-08	0.00117662	4.56642e-07	0.0012149	0.000110501	-0.000510027	0.261073	0.00134016	0.0439355	0.000941879	0.133202	0.000703311	0.310688	0.000243401	0.753373	0.000552096	0.46401	1	0.801887
43195	CHM	0.0736542	0.000724819	0.00569155	0.0601883	-0.000737688	0.0484076	0.0138386	0.0223594	-3.03959e-05	0.515333	-0.000206891	0.05481	0.000861635	2.6512e-05	0.000241017	0.384287	-0.00230837	7.31729e-09	-0.000159705	0.781407	-0.000120386	0.827718	-0.000554292	0.362754	0.000217756	0.748973	0.00055039	0.407049	1	0.801887
42820	NMRK2	0.126434	6.26454e-18	0.00381995	0.0607692	-0.00141439	1.82519e-08	0.0229149	1.89783e-08	-9.18287e-05	0.00332204	5.74137e-05	0.42445	-0.000195173	0.153961	-7.72993e-05	0.677517	0.000380031	0.157044	0.000364893	0.345084	-0.000177478	0.633286	-0.000559313	0.172274	-0.000189417	0.679466	-0.000418978	0.348814	1	0.801887
51356	HAGH	0.0172182	0.512657	0.00687391	0.060951	0.0039146	4.07926e-18	-0.365719	0	0.00030882	1.1658e-07	-0.000647519	1.18405e-06	0.000735427	0.00360811	-0.00031171	0.362067	0.000848625	0.0805085	0.00195378	0.006964	0.000640478	0.346825	0.00201351	0.00720413	-0.00524831	2.78716e-10	5.55559e-05	0.945503	1	0.801887
51706	SERPINE1	-0.134431	3.02129e-08	0.00632951	0.0613562	0.00264949	1.92569e-10	-0.104432	1.53002e-53	-0.00106533	3.78672e-87	-0.000387569	0.00173715	0.00145604	5.38755e-10	0.00178697	1.6926e-08	0.000681214	0.128099	0.000632458	0.344946	0.001049	0.095902	-0.000860309	0.214415	0.000105738	0.890303	0.000305363	0.684693	1	0.801887
51228	CTSF	-0.696093	0	0.00375162	0.0614713	0.0110677	0	0.121223	1.4867e-198	0.000289716	8.5445e-20	-5.01945e-05	0.493858	0.000764188	3.79093e-08	-0.00190858	2.24204e-24	-0.00188158	1.35672e-12	-0.000240215	0.545899	-0.000386936	0.299308	-0.000928926	0.0235914	-0.00128872	0.00456095	-0.000155692	0.726624	1	0.801887
41658	AMY1A_AMY1B_AMY1C	-0.289687	1.23533e-57	-0.00469709	0.0615182	0.00517118	2.80334e-62	0.0158456	0.00163491	0.00147925	0	-0.000931474	2.3696e-25	0.00139272	2.6078e-16	-0.00226661	1.04029e-22	-0.000763985	0.0212232	0.000428343	0.374917	-0.000904215	0.0483135	-0.00116835	0.0209321	-0.00216015	0.000132975	0.000475651	0.383894	1	0.801887
51279	IL18BP	-0.580856	0	-0.00286661	0.0617884	0.0112604	0	-0.0666701	6.05715e-104	-0.000631765	4.50546e-147	-2.30955e-05	0.681088	0.00100397	4.03666e-21	-0.000115964	0.4208	0.000860604	2.27432e-05	0.000116778	0.699954	0.000728319	0.0110152	0.000590625	0.0601401	0.000583701	0.0930513	0.000533918	0.11772	1	0.801887
43232	BOLA2_BOLA2B	-0.118918	1.9516e-09	0.00514331	0.0618689	0.00327773	5.28204e-22	-0.148265	4.69226e-158	0.000420767	4.94186e-23	-0.000301655	0.00221386	0.0010686	1.07611e-08	0.000493081	0.050646	0.000667899	0.0655841	0.00148674	0.00477561	0.000365356	0.467096	0.00107311	0.053197	-0.00126146	0.0425158	-0.000378296	0.530073	1	0.801887
51076	NPDC1	-0.686249	0	-0.0029415	0.0619571	0.0127296	0	-0.0194026	7.99722e-10	-0.000521663	1.80986e-95	0.000154593	0.00730341	0.00109103	1.75032e-23	0.000802991	5.77537e-08	0.000320118	0.125035	-0.000214877	0.491334	0.000126296	0.667746	-0.000211776	0.512263	-3.16513e-05	0.9294	0.0008941	0.0109594	1	0.801887
49867	LHB	-0.78859	2.66041e-140	-0.00811214	0.0620731	0.0119885	6.95071e-111	0.523749	0	-0.00045867	2.87743e-11	3.6316e-05	0.818753	-0.00022566	0.452522	-0.000403462	0.317993	-0.000593021	0.30331	0.000460086	0.590345	-0.0024492	0.00239484	-0.000223412	0.801462	-0.00136922	0.165269	-0.000464871	0.629419	1	0.801887
43434	TBCA	0.0471049	0.125097	0.00795973	0.0624313	0.000750653	0.154237	-0.102399	4.82094e-33	-3.54403e-05	0.590136	-0.000568794	0.000178858	0.00170889	3.36813e-09	0.00106095	0.00676926	-0.00156418	0.00537492	0.00116549	0.15602	0.000919412	0.237788	0.00104439	0.224395	0.000299712	0.756085	0.000649802	0.485657	1	0.801887
50910	CXCL5	-0.816594	2.169e-88	0.010591	0.0631067	0.00982478	1.6605e-44	0.469776	0	0.00307802	1.38413e-249	0.0021274	1.80507e-24	0.00124833	0.00155661	0.00212262	7.23737e-05	7.31462e-05	0.922742	0.000171704	0.87897	0.000739233	0.48695	-0.00124492	0.286378	0.00549309	2.08935e-05	0.0049735	9.00219e-05	1	0.801887
44480	C1S	-0.138286	9.73229e-74	0.00196358	0.0633496	0.00216604	8.05873e-62	0.0177752	4.35281e-17	-0.000133437	2.51249e-16	-4.34885e-05	0.247538	0.000334402	2.93386e-06	8.98871e-05	0.352971	3.68255e-05	0.791545	0.000149301	0.461264	0.000640133	0.000920369	0.000452775	0.0339406	-6.0333e-05	0.799932	-0.000191625	0.407538	1	0.801887
44480	APOE	-0.23503	9.81929e-21	0.00649954	0.063405	0.00371809	7.18531e-18	0.140514	3.23655e-89	0.000100812	0.0613922	-0.000294732	0.017931	-3.25971e-05	0.890497	-0.00118131	0.000227075	-0.000573527	0.213752	0.000257682	0.700916	-0.000366258	0.566833	0.000676971	0.338174	-0.00197795	0.0120905	-0.000111351	0.88442	1	0.801887
42820	MAPK13	-0.115552	9.33891e-14	-0.0040016	0.0634917	0.00213134	1.1463e-15	-0.0100471	0.0198772	-7.45245e-05	0.0243705	-2.82149e-05	0.710774	0.000120038	0.407464	5.72065e-05	0.771248	0.000422795	0.136943	-0.000257985	0.52828	0.000424521	0.28098	-0.000253463	0.558984	-0.000789269	0.103846	0.000830659	0.0793024	1	0.801887
44448	PGA4	-0.588293	1.7155e-118	-0.00653617	0.0635813	0.0125355	3.52117e-181	-0.164251	2.04751e-119	-0.000191151	0.000445804	-8.62363e-05	0.492679	-4.26084e-05	0.858392	-0.000801068	0.0130411	0.0011223	0.015666	-0.00174827	0.00959587	0.000427366	0.506471	-0.0016937	0.0170467	0.000234991	0.766875	0.000742309	0.3362	1	0.801887
50594	EPHB6	-0.202909	3.23327e-73	-0.00288982	0.06391	0.0028258	6.18188e-49	0.0933887	1.18251e-194	-0.000508699	3.22257e-93	-0.000273765	1.48322e-06	0.000970402	2.3277e-19	-6.56214e-05	0.653796	9.96797e-05	0.629232	-0.000203233	0.507321	0.000227542	0.434384	-0.000440027	0.167559	-0.000664556	0.060323	0.000601098	0.0839988	1	0.801887
42978	BOLA1	-0.162643	9.77032e-17	0.00504498	0.0639901	0.00415487	3.79079e-35	-0.0665134	3.04232e-34	-0.000294454	2.37223e-12	-0.000169099	0.0811809	0.00056498	0.00220353	0.000321401	0.1958	-0.000581065	0.105761	0.000620866	0.22904	-0.00079429	0.110923	0.00036213	0.509101	-0.000778915	0.202812	-0.000636475	0.287067	1	0.801887
44300	SYT1	-0.30342	7.03282e-104	-0.00360136	0.0641607	0.00549488	1.73643e-115	0.050906	4.77959e-39	-9.89244e-05	0.000986488	-0.000317138	4.51094e-06	0.000145767	0.267828	0.000554351	0.00180717	0.00115143	7.08034e-06	-0.00051805	0.163923	-0.000439163	0.215674	-0.00104336	0.00774896	0.000154365	0.724491	-0.000372079	0.381735	1	0.801887
42820	PFDN4	0.168284	1.45609e-18	-0.00491983	0.0644139	-0.0020386	5.267e-10	0.002801	0.598735	-0.000114824	0.00493253	7.53454e-05	0.422191	5.30911e-05	0.766494	0.000453614	0.061678	-0.000742544	0.0342465	0.000702147	0.164171	-0.000934829	0.0543186	0.000407675	0.446171	0.000338062	0.572289	0.000696184	0.233239	1	0.801887
50140	DUOX2	0.255428	3.54749e-23	0.00663023	0.0645001	-0.00221491	5.2895e-07	0.0389346	6.09066e-08	-0.000174209	0.0022562	-7.17497e-05	0.583811	0.000316993	0.201682	-2.00122e-05	0.952387	0.000734318	0.122087	-0.000222403	0.75183	0.000454527	0.495635	-0.000451717	0.537566	-0.00050291	0.535959	-0.00134443	0.0916657	1	0.801887
43232	FSTL1	-0.171349	5.66791e-96	0.00211114	0.0648194	0.00300756	2.06664e-100	0.00731585	0.00138694	-0.000140006	2.29802e-15	6.91924e-05	0.0908309	0.000485011	4.03714e-10	0.000587988	1.97526e-08	0.000350544	0.0199026	-0.000149046	0.495515	6.71421e-05	0.747475	0.000127297	0.580583	-0.000325912	0.20673	-0.000256635	0.304783	1	0.801887
51076	APLP1	-0.00930835	0.620093	-0.00483	0.0649051	-0.00120756	0.000177425	0.176061	1.17256e-244	0.000934445	1.02404e-110	-0.000770039	8.59184e-16	-0.000796247	1.12821e-05	-0.00129236	1.44826e-07	0.000564397	0.103351	-0.00071128	0.170083	0.000429781	0.379014	-0.000511724	0.34026	-0.000466462	0.431638	-0.00176078	0.00255087	1	0.801887
43195	PPT1	0.262589	8.47372e-22	0.00701045	0.0651948	-0.000761588	0.104563	-0.0314054	3.64686e-05	6.11445e-05	0.29723	0.000125296	0.354241	-9.84117e-05	0.702255	-2.23119e-05	0.948847	0.000111427	0.823992	0.00101248	0.161144	-0.000852701	0.21951	0.00122716	0.108502	-0.000336859	0.69336	2.87892e-05	0.972443	1	0.801887
42948	COPB2	0.0528753	0.000542609	0.00392365	0.0654523	-0.000450102	0.0861235	-0.030433	8.77097e-13	5.52959e-05	0.0905686	0.000119328	0.113242	0.000317496	0.0268905	0.000303335	0.118137	-0.000742626	0.00817632	-0.00013017	0.746658	-4.84256e-05	0.900696	-0.000398853	0.351192	-2.08964e-05	0.965131	0.000434665	0.351189	1	0.801887
50960	CCL17	-0.776593	1.40329e-122	0.008442	0.0654897	0.0144815	1.87008e-144	-0.0717587	5.62525e-15	0.000542181	1.03706e-13	0.000618043	0.000227633	0.00187129	3.70757e-09	0.0021162	7.98916e-07	0.00211105	0.000511104	0.000936853	0.302594	-0.000216009	0.800867	0.00085419	0.363972	0.00173297	0.0956205	0.00262938	0.00992009	1	0.801887
51356	LRIG1	-0.324735	2.91593e-151	0.00317217	0.0656576	0.00459613	6.99353e-104	0.108989	6.60541e-217	0.000400178	2.69086e-48	0.00149878	5.7483e-126	0.00150965	5.30574e-37	0.00053857	0.000802317	-0.000572787	0.0120372	0.000787595	0.0205777	0.000720661	0.0242441	-0.000697545	0.0475102	-0.001791	4.55663e-06	0.000311492	0.414607	1	0.801887
43232	LAMB1	-0.285502	9.10051e-153	-0.0027623	0.0658655	0.00427229	5.3152e-117	0.0664256	1.17492e-107	5.21614e-05	0.0245566	0.000394165	2.27326e-13	-0.000241438	0.0177858	-0.00041335	0.00265553	-0.00072671	0.000238513	-0.00040705	0.156466	-0.000196996	0.472031	-0.00114973	0.00014533	-6.61667e-05	0.845275	-0.000337004	0.304918	1	0.801887
43232	PAGR1	0.0428275	0.00628882	0.0040075	0.0659436	0.000258408	0.336394	-0.027998	1.3798e-10	-3.98723e-05	0.236296	-0.000294469	0.000159907	0.000509946	0.000562026	0.000537126	0.00712775	-0.000250015	0.383683	0.000560603	0.178679	0.000283742	0.475353	0.000402354	0.359573	-0.000406952	0.408194	-0.000152907	0.748387	1	0.801887
44409	GRHPR	0.251913	2.474e-28	0.00582708	0.0660531	-0.00327502	5.81008e-17	-0.103649	7.57199e-60	-0.000314481	1.39834e-10	-0.00109724	3.15337e-22	0.00118073	3.92777e-08	0.000970013	0.000804889	-0.000121794	0.770795	0.00207649	0.00070266	0.000976314	0.0910991	0.00089752	0.160206	0.000944709	0.185574	0.000124794	0.857406	1	0.801887
44117	THTPA	0.121566	0.000101384	0.0079835	0.0662115	-0.00164341	0.00218574	-0.0443839	3.38234e-07	-0.000148695	0.026381	0.00022634	0.143632	0.00133206	5.97844e-06	0.000857865	0.0309932	-0.00208766	0.000272457	0.000124754	0.880829	0.000734418	0.355902	0.000925247	0.292182	0.00012968	0.894722	0.00142651	0.133898	1	0.801887
42978	BHLHE40	0.132492	1.48763e-07	0.0064449	0.0662656	-0.00119405	0.00575074	0.0244277	0.000499526	-9.69753e-05	0.0730379	-3.92244e-05	0.753536	0.000295549	0.213847	-2.59481e-05	0.935391	-6.36027e-05	0.890692	-0.000590194	0.374809	-0.000739942	0.249062	-0.000958667	0.174896	-0.000737961	0.348985	0.000155829	0.839677	1	0.801887
42978	TMPRSS11B	0.276601	2.00518e-24	-0.00691545	0.066773	-0.00230284	7.27033e-07	0.0384647	3.42517e-07	-0.000294229	4.22234e-07	-9.29629e-05	0.488803	0.000269614	0.291494	-0.000450999	0.189982	-0.000331863	0.504754	-0.000617724	0.387544	-0.000641889	0.352309	-0.00067403	0.374925	-4.20269e-06	0.996041	-0.000452019	0.585142	1	0.801887
49221	MMP1	-0.834337	2.74452e-141	0.00839739	0.0667935	0.013989	3.99998e-135	-0.00707906	0.440101	-0.000675791	2.32012e-20	0.000691583	3.17079e-05	-0.000663859	0.0352024	0.00182677	2.25985e-05	-0.000117576	0.846351	0.000176104	0.844599	-0.00174735	0.0413836	0.00136039	0.146282	-0.000766551	0.460895	0.00179818	0.0768245	1	0.801887
44300	CRYGD	0.0169847	0.620975	0.00875557	0.0669731	-0.00161071	0.00626682	0.120565	2.03773e-36	-0.000846278	2.00014e-30	0.000454386	0.00747217	0.00182707	1.58083e-08	-0.00188789	1.52381e-05	-0.00106179	0.091789	-0.00027544	0.763211	-0.00168854	0.0526566	-0.00180126	0.0613011	-0.000890202	0.408021	0.000412761	0.692855	1	0.801887
44409	RAB10	0.0438609	0.0219933	0.00486968	0.0673519	0.000153946	0.639296	-0.00829672	0.119302	0.000241694	4.28815e-09	-0.000272098	0.00417402	0.00102595	1.30643e-08	0.00097024	6.56002e-05	-0.00104959	0.00279128	0.000519022	0.313106	0.000571131	0.239148	-0.000141211	0.79244	0.00108152	0.071106	0.00111995	0.0548207	1	0.801887
43120	DDX39A	0.00662959	0.41334	-0.00206385	0.0674975	3.28967e-05	0.812947	-0.000964341	0.669106	-6.8353e-05	8.35499e-05	5.40541e-05	0.179492	5.64621e-05	0.460184	-1.2071e-05	0.906871	-1.69226e-05	0.909367	-0.000186529	0.384734	-0.000232148	0.259662	-0.000220438	0.33185	-4.73964e-05	0.851832	0.000107508	0.664027	1	0.801887
51076	FBP1	-0.834482	2.49445e-211	0.00680521	0.0681143	0.0165165	7.5633e-280	-0.113851	2.70792e-52	0.000725459	3.27779e-34	-0.000580912	2.06073e-05	-0.000472434	0.0676155	-0.000416084	0.234918	0.00059577	0.227816	0.0012377	0.0940307	0.000333522	0.632045	0.00070388	0.357524	0.000494091	0.559042	-0.000225151	0.786675	1	0.801887
44300	BLOC1S3	0.0920529	2.83669e-10	0.00370105	0.0683173	-0.000225265	0.36812	-0.0200323	8.0846e-07	4.69609e-05	0.133955	-0.000267639	0.000207981	0.000728793	1.10803e-07	0.000220892	0.233465	-0.00198477	1.19594e-13	0.000262877	0.498485	8.81574e-05	0.811751	-0.000243394	0.551657	0.000683854	0.134584	0.000166083	0.708296	1	0.801887
44480	ADIPOQ	-1.14237	0	0.00638535	0.0684973	0.0125522	7.21886e-184	0.79594	0	-0.00190643	8.59628e-270	0.00153829	6.20393e-35	-0.00207651	2.00837e-18	-0.000547664	0.0877371	-0.000954291	0.0387869	2.08776e-05	0.975202	-0.00102944	0.107845	-0.000812913	0.250621	-0.0014747	0.0616266	0.000162165	0.832519	1	0.801887
44329	NRN1	0.0672072	1.35924e-07	0.00322668	0.068647	-0.000827707	0.000153817	0.0068387	0.053811	-7.62838e-05	0.00528999	0.000191953	0.00232326	-8.54986e-05	0.475956	-0.00013254	0.413584	-7.93786e-05	0.734252	7.98423e-05	0.813946	-0.000318255	0.325429	0.000228976	0.52132	-0.000257334	0.518941	0.000376955	0.331262	1	0.801887
50998	CLC	-0.628248	9.43477e-148	0.0061305	0.0689889	0.0135876	8.14613e-233	-0.122886	9.41159e-74	-7.41349e-05	0.167256	-0.000938106	2.66572e-14	0.00184842	2.45433e-15	0.000695262	0.0280162	0.00153032	0.000608832	0.00104323	0.118113	0.00044027	0.484132	0.00104384	0.130882	-0.00169903	0.0261877	-0.00169882	0.0237692	1	0.801887
43518	FUT1	0.00171416	0.938671	-0.0056292	0.0691882	0.00141011	0.000225418	-0.0176097	0.00450527	-0.000182475	0.000130542	0.000340199	0.0020446	-0.000185828	0.37654	-0.000684835	0.0159216	-0.00122322	0.00274835	0.000837343	0.157882	0.000169051	0.765679	-0.000281506	0.652747	-0.00104044	0.135857	-0.00107645	0.11436	1	0.801887
51122	TNFRSF13B	-0.368893	1.85003e-200	-0.00307411	0.0696994	0.00691171	1.56966e-238	-0.00115118	0.734513	0.000830029	2.57538e-206	-0.000175699	0.00454729	0.00129675	2.02683e-28	-0.00126381	1.54329e-15	-0.000684173	0.00230816	0.00131033	9.77562e-05	0.000411367	0.193712	0.00124703	0.000338766	0.00015129	0.693988	0.000787075	0.0368321	1	0.801887
44300	BCL2L1	0.0314708	0.372596	0.00888384	0.0704757	-0.000909652	0.132998	0.00789068	0.421734	-4.74919e-05	0.530952	-0.000325475	0.0622142	0.00178041	8.29694e-08	0.000771434	0.0854085	-0.00204024	0.00161765	0.00106132	0.258604	0.000864339	0.33439	0.000165737	0.866923	0.00158171	0.152531	0.000784362	0.465116	1	0.801887
51076	SFTPD	-0.816692	5.20694e-252	0.00602551	0.0710094	0.0150222	4.92606e-289	-0.0444064	3.12892e-11	-0.00158145	1.10997e-192	0.00251431	6.31244e-94	-0.00118293	3.15011e-07	0.00108634	0.00052803	0.00157817	0.000356153	0.00153009	0.0206794	0.0012506	0.0447593	0.00073369	0.283729	0.000980913	0.194804	0.000283351	0.703435	1	0.801887
51076	CDH2	-0.879876	0	0.00330145	0.071177	0.0172517	0	-0.170799	0	-0.000456801	3.37272e-55	-0.000644027	6.50031e-22	0.00156785	4.50453e-35	0.000126875	0.460257	0.000868416	0.00033861	0.000613638	0.090531	0.0013186	0.000113629	0.00100928	0.00715149	-0.000319083	0.441734	-0.00104289	0.0105991	1	0.801887
51706	DLK1	-1.01361	0	-0.00502394	0.0712414	0.0181654	0	-0.0455262	3.23281e-16	-0.000935712	6.8029e-99	-0.000166501	0.102163	0.00188562	1.63081e-22	6.08423e-05	0.815499	7.49932e-05	0.838751	0.000266651	0.628597	0.000867652	0.0943314	-0.000491881	0.388531	0.000553818	0.380207	-0.000266387	0.666967	1	0.801887
44480	SELENOP	-0.155017	2.40693e-83	0.00200639	0.07147	0.00269467	1.61448e-85	-0.0114535	2.66975e-07	-6.73466e-05	8.47582e-05	-0.000143306	0.000294654	-0.000186622	0.0131693	-0.000465902	4.79742e-06	-0.000985248	1.86082e-11	0.000390338	0.0672471	-0.000663039	0.00111021	-0.000843728	0.000173725	-0.000260475	0.298565	-0.000595793	0.0144271	1	0.801887
44409	BCAT1	-0.308155	3.0292e-174	0.00272674	0.0719798	0.00611037	1.87478e-231	-0.0224446	1.36373e-13	-0.000159416	1.02128e-11	-6.86765e-05	0.20405	0.000379919	0.000216956	0.00058108	2.67834e-05	-0.00043802	0.0283989	0.000510351	0.0814652	-0.000377252	0.172015	-0.000350972	0.250631	0.000201472	0.554804	0.000517289	0.119236	1	0.801887
50432	TMPRSS5	-0.490246	3.96978e-270	0.00347204	0.0724805	0.00729018	3.44872e-204	0.107551	1.35781e-168	0.000726124	9.15512e-123	0.000165946	0.0183965	0.000577959	1.47674e-05	-0.000937688	2.1491e-07	-0.000576934	0.0240238	0.000136566	0.718915	-0.000150692	0.675952	0.000144961	0.713481	-0.00112654	0.0102353	-7.28547e-06	0.9865	1	0.801887
50140	HK2	-0.0234782	0.0171063	-0.00246308	0.0725205	0.000379399	0.0246582	-0.00433142	0.115081	3.21768e-05	0.140166	4.4972e-05	0.369254	0.000117547	0.215711	-9.9879e-06	0.937888	6.26943e-05	0.72997	8.95712e-05	0.739116	-0.000285326	0.263377	-0.000117153	0.675882	-0.000149381	0.63071	-0.000125672	0.680138	1	0.801887
51542	IL1RL1	-0.0584396	0.00043044	-0.00415074	0.0727785	0.0049103	1.69433e-66	-0.414054	0	-0.000487227	4.55182e-40	0.000415069	9.64791e-07	0.000471936	0.00328461	9.89629e-05	0.64797	0.00108738	0.000385676	0.00125373	0.00614779	-0.000496019	0.249991	-0.000692956	0.143609	-0.00097108	0.0639877	-0.000864865	0.0928999	1	0.801887
51542	FAS	-0.668644	0	-0.00294564	0.0743202	0.0132764	0	-0.115597	6.19884e-265	-0.000350445	1.08359e-40	-7.16034e-05	0.236187	0.00072238	2.86441e-10	-0.000202029	0.191413	0.000138317	0.526805	-0.00014574	0.655305	0.000983993	0.00138187	0.000315436	0.350778	-9.97291e-05	0.789759	-0.000404248	0.270983	1	0.801887
44363	DBH	-0.128701	0.000929995	-0.0096358	0.0745484	-0.00355707	9.59454e-08	0.192831	6.18599e-71	-0.00208833	3.48683e-137	0.00147688	1.84936e-14	-0.00102051	0.00533815	0.000423579	0.392124	-0.0069259	2.46883e-22	-0.00425684	3.88683e-05	-0.00337564	0.000624497	-0.00277307	0.0108596	-0.00174765	0.150344	-0.000492372	0.677476	1	0.801887
43602	CINP	0.0864224	3.71336e-08	0.00388891	0.0748176	-0.00076258	0.00463988	0.012459	0.00434177	-7.37098e-05	0.028337	-7.58038e-05	0.329852	4.94557e-05	0.738588	-0.000208743	0.296972	-0.000397199	0.167537	-0.000329739	0.430224	-0.000887554	0.026371	-0.000435041	0.323577	6.70953e-05	0.89146	-0.000451092	0.347979	1	0.801887
44220	NDUFB7	0.241209	2.83401e-14	0.0078467	0.0750946	-0.00361432	3.05182e-11	0.00927381	0.293199	0.00025002	0.000236765	-0.000898336	1.1679e-08	0.00190374	1.8663e-10	0.0013869	0.000570446	-0.00151602	0.0091035	0.00177038	0.0362965	0.00268587	0.000845451	-0.000732553	0.410632	0.00132829	0.181462	0.00208136	0.0309211	1	0.801887
42948	LAMA1	0.205788	3.22405e-27	0.00471549	0.0753553	-0.00189702	6.28871e-09	0.0360895	9.80536e-12	-0.000237234	5.50707e-09	0.000163131	0.0820139	-6.64398e-05	0.709892	-1.77166e-05	0.941559	0.000180359	0.605895	-0.000179388	0.720647	-5.03039e-05	0.917077	-0.000184299	0.72933	-0.000449472	0.450087	-0.000970641	0.0944851	1	0.801887
43434	PTRHD1	0.0338073	0.116118	0.00532062	0.075432	1.29533e-05	0.972004	-0.0520239	3.70035e-18	0.000214773	3.17838e-06	-0.000375033	0.000420614	0.000963853	1.9298e-06	0.000450986	0.100345	-0.00102708	0.00907688	0.000956736	0.0964614	0.00100073	0.0666266	0.000412265	0.493606	0.00017427	0.796546	0.000326435	0.617086	1	0.801887
44220	CEACAM19	-0.130407	2.78964e-20	-0.00349101	0.0755416	0.00378111	9.73775e-55	-0.168304	0	-3.55825e-05	0.2403	6.39761e-05	0.361837	0.000822781	6.38888e-10	0.000715672	6.61171e-05	0.00112637	1.37018e-05	0.000100036	0.790625	-0.000308775	0.389166	-0.000376291	0.342874	-0.00121594	0.00604841	0.000655471	0.127188	1	0.801887
50836	IGSF3	-0.392987	1.4913e-189	0.00329838	0.0756891	0.00808718	5.16445e-271	-0.0321432	5.76961e-18	0.000779931	2.03524e-153	-0.000265304	8.90566e-05	0.00136806	1.8514e-26	0.00138589	1.20103e-15	0.000543816	0.0270548	0.000929095	0.0131301	0.00121163	0.000439127	0.000643092	0.0917325	-0.000189557	0.652947	-0.00096005	0.0200445	1	0.801887
50963	RETN	-0.212148	1.20466e-43	-0.0037849	0.075796	0.00389862	7.87327e-50	0.0138313	0.00119716	-0.000462464	2.74465e-42	0.00129588	2.33225e-61	-0.000929545	3.6049e-10	-5.45327e-06	0.978284	0.000260012	0.357309	-4.91313e-05	0.90853	-0.000909719	0.0222986	-0.000951778	0.0301563	-0.000233169	0.629073	0.000104471	0.825888	1	0.801887
44220	MTIF3	0.106375	0.00063781	0.00767662	0.0763235	-0.000932903	0.0808163	-0.0410266	2.21611e-06	0.000380022	1.29369e-08	-0.000295654	0.0559734	0.0027697	3.96683e-21	0.0013534	0.00062122	-0.000303124	0.595536	0.000750292	0.366449	0.00161892	0.0405882	0.000172002	0.844108	0.00186366	0.0563481	0.00190327	0.0445676	1	0.801887
50836	PDCD1LG2	-0.304839	4.59848e-162	-0.00276479	0.0763831	0.00536924	9.00426e-171	-0.000142457	0.963649	0.000286383	6.36102e-31	7.15059e-05	0.208716	0.000898432	8.67923e-17	0.000908481	4.22101e-10	0.000217613	0.292387	0.000539573	0.0864655	-9.22812e-05	0.74997	0.00047639	0.137075	0.000394995	0.264762	-0.000683336	0.0488343	1	0.801887
50999	CD200	-0.346804	2.66793e-289	-0.00234004	0.0766844	0.00514097	2.39825e-217	0.102461	0	-0.000340552	1.01057e-58	-0.000140569	0.00357196	0.000405071	9.35682e-06	-0.000259014	0.0364169	-0.000343849	0.0497005	-0.000720152	0.00572014	0.000160342	0.514282	-2.39436e-05	0.929398	-0.000558049	0.0625635	-0.00012334	0.674696	1	0.801887
50279	VASN	-0.190447	4.84615e-84	-0.002414	0.076789	0.00370845	1.17177e-107	-0.0425344	1.42587e-54	-0.000238252	5.28031e-28	3.54699e-05	0.478508	0.000976947	6.1667e-25	0.000351245	0.00594803	-0.00134403	1.01557e-13	-0.000202407	0.454832	0.000567809	0.0255663	-0.000545018	0.0513428	-0.00074962	0.01527	4.79577e-05	0.874219	1	0.801887
44329	CSNK2A1	0.130313	5.62898e-16	0.00395353	0.0770759	-0.00211996	1.58876e-14	0.0271447	1.32296e-09	0.00010954	0.00150613	0.000110769	0.16369	0.000288247	0.056855	0.000383774	0.0606456	-0.000520679	0.0776283	0.000557008	0.193233	-0.000112213	0.783494	0.000300421	0.504902	-9.84551e-05	0.844957	7.97e-05	0.870683	1	0.801887
51076	CTSL	-0.367923	0	0.0021404	0.0770908	0.00731504	0	-0.0776787	7.70579e-223	9.36246e-05	1.22029e-06	-1.25144e-05	0.777437	0.00039137	3.098e-06	-0.000597554	1.47972e-07	0.000710099	9.4922e-06	0.000407788	0.0891634	6.63665e-05	0.76908	-0.000169631	0.494489	-9.95636e-05	0.716794	0.000563843	0.0367892	1	0.801887
44201	CAPN3	0.0169458	0.205578	0.00328852	0.0771053	0.000933025	4.85224e-05	-0.0615102	4.2594e-61	0.000112792	8.37751e-05	0.000207401	0.00173863	7.01288e-05	0.577511	-0.000373191	0.0284254	-0.000740871	0.00254608	-0.000118751	0.738982	-0.000256353	0.451444	-5.23217e-06	0.988897	-0.000676072	0.107042	-0.000109277	0.788589	1	0.801887
51194	CST3	-0.690569	0	-0.00259877	0.0771972	0.0136966	0	-0.132614	0	-0.000114563	9.37846e-07	-9.78664e-05	0.0690363	0.00115484	9.75901e-30	0.000144205	0.296822	-9.3324e-05	0.631627	-6.19093e-05	0.831374	1.02765e-05	0.970173	0.000254252	0.398852	0.000453286	0.173543	0.000632869	0.0529437	1	0.801887
44201	DYNC1H1	0.0724509	1.60868e-05	0.00412107	0.0774447	-0.000547039	0.0576038	0.00744212	0.111214	5.98178e-05	0.096356	-9.96146e-05	0.230558	0.000250531	0.112721	7.89912e-05	0.711595	-7.77715e-07	0.997985	0.00019997	0.654712	0.000570408	0.18172	-9.89073e-05	0.833915	-0.000345051	0.512067	0.00152223	0.00291013	1	0.801887
43232	AIF1L	-0.10414	2.32245e-07	0.00492898	0.078308	0.00415349	2.84235e-33	-0.0029168	0.602628	-0.000103812	0.0163822	-0.000145585	0.146211	0.000232771	0.220295	0.000111724	0.663038	-0.000256373	0.486813	-0.000695794	0.193819	5.826e-05	0.909164	-0.000402068	0.476029	-8.66959e-05	0.890902	-0.000340589	0.578075	1	0.801887
44036	NMI	0.079213	0.00201807	0.00626551	0.0788725	-0.000280743	0.523463	-0.00254385	0.721513	0.000857991	9.3964e-55	-0.000570951	6.82704e-06	0.00196019	4.52335e-16	0.000483849	0.137848	-0.000695345	0.139383	-0.00038045	0.577007	-0.000367985	0.572594	0.00130686	0.0695483	0.00182595	0.0230842	0.000947354	0.224766	1	0.801887
42948	IFNW1	0.0814718	1.6851e-10	0.00311948	0.0791386	-0.000868906	7.14832e-05	0.0129546	0.000263705	-7.55918e-05	0.00554816	7.76843e-05	0.216455	0.000241763	0.0433656	-0.000169754	0.294491	-0.000362918	0.12129	-0.000191682	0.568505	-0.000809305	0.012426	1.98743e-05	0.955591	-4.45365e-05	0.91107	-0.000649751	0.0948042	1	0.801887
51631	IL18R1	-0.248775	3.34623e-89	0.0030354	0.0792878	0.00522089	2.51674e-132	-0.0579183	1.14531e-62	0.000187952	8.63864e-12	-0.00114858	8.1612e-74	0.00162747	4.1935e-42	0.000688439	1.98741e-05	1.62547e-05	0.943365	0.000733105	0.0320782	0.00112637	0.000446972	-0.000316122	0.370717	-0.00108208	0.00577304	0.000630255	0.100247	1	0.801887
51356	HBEGF	0.0854125	0.00109514	0.00639793	0.079534	-0.000950288	0.0341554	-0.0688642	4.42836e-21	-0.00124197	2.10556e-101	-0.000723351	4.86959e-08	0.00200983	1.30235e-15	0.000387338	0.254869	-0.00126528	0.00880094	0.000908681	0.207023	8.63434e-05	0.898543	-0.00211928	0.00446239	0.000415053	0.615819	3.3052e-05	0.967389	1	0.801887
51082	IGF2R	-0.296622	2.08864e-264	0.00207203	0.0796946	0.00568244	0	-0.0370325	5.97152e-55	-0.000104075	2.9635e-08	0.000342293	1.8786e-15	0.00076721	5.74943e-21	0.000260728	0.0179654	0.000180564	0.248584	-1.5042e-05	0.948777	0.000446776	0.0424236	0.000196532	0.417697	-5.52769e-05	0.836905	0.000346447	0.1878	1	0.801887
50678	ULBP2	-0.559289	0	0.00329123	0.0797468	0.0095669	0	0.0535709	6.48911e-46	-0.00154339	0	-0.000794805	2.99147e-31	0.00121473	7.14293e-21	0.00131147	8.86787e-14	0.000504877	0.0422331	-0.00018576	0.61503	0.000795309	0.0231979	-0.000289543	0.450836	8.34309e-05	0.844807	0.00100249	0.016639	1	0.801887
51505	PRTG	-0.11915	2.33835e-41	0.00216055	0.079752	0.00250361	3.79252e-61	-0.0337324	1.89433e-42	-0.00050535	6.93672e-146	0.000184747	3.77324e-05	-9.07817e-05	0.285533	-0.000527516	4.52472e-06	-0.000958102	4.28116e-09	-0.000364487	0.13456	-0.000417352	0.0683963	1.1787e-05	0.962697	-0.000179281	0.521312	-0.000772034	0.00473323	1	0.801887
49297	CD55	-0.304345	4.45841e-235	-0.00225154	0.0803301	0.00628722	0	-0.0773591	1.31293e-195	-0.00039783	8.87283e-84	0.000350229	1.21665e-13	7.47272e-05	0.403027	0.000959185	2.09036e-15	-0.000229964	0.177869	-0.00032675	0.207761	0.000535104	0.0260839	-0.000536565	0.0430269	-0.000405189	0.166062	0.000604297	0.0350636	1	0.801887
51228	NECTIN4	-0.179289	1.13537e-57	-0.00272812	0.0805002	0.00454656	1.56542e-123	-0.100897	1.26446e-226	0.000198637	1.01627e-15	-0.00012118	0.0337654	0.00146774	6.26202e-42	0.000137414	0.345568	0.00160971	6.51728e-15	0.000590677	0.0563215	0.000304264	0.294199	-4.7431e-05	0.881902	-3.28244e-05	0.926016	0.00119862	0.000541939	1	0.801887
50116	IFNG	-0.975155	1.79193e-124	0.00994487	0.081393	0.0152444	7.43198e-104	0.17258	2.30205e-51	-0.000297423	0.00106559	-0.00139976	2.00817e-11	0.0013003	0.0010043	0.000250121	0.638303	0.00184616	0.0145863	-0.00169486	0.129939	0.00244661	0.0210306	0.00157019	0.17857	0.00359655	0.00551878	-0.00217856	0.0853899	1	0.801887
43232	GRP	-0.512934	5.43025e-157	-0.00463544	0.0814856	0.00904837	6.70944e-166	0.0179159	0.000766836	0.000282976	5.87918e-12	-0.000827987	3.57895e-18	0.00110961	7.91252e-10	0.000379123	0.119779	0.00136906	9.35003e-05	0.000186337	0.714263	0.000247659	0.609836	-0.000207398	0.698892	4.08996e-05	0.945718	0.000507822	0.382899	1	0.801887
51144	KLK6	-0.147416	3.28557e-41	-0.00266087	0.0817308	0.00342586	4.37553e-74	-0.0933832	6.8008e-203	-0.000259655	8.33295e-27	-0.000562683	7.48761e-24	0.000436326	3.69828e-05	4.83087e-05	0.734867	0.00196478	2.66164e-22	0.000193956	0.521864	9.01603e-05	0.750828	-5.61515e-05	0.85738	-0.000323347	0.350687	-0.000164615	0.627351	1	0.801887
50140	CRX	0.542845	1.15577e-45	0.00926033	0.0820789	-0.00389148	2.96273e-09	0.0159392	0.135359	0.000369277	1.30357e-05	-0.00120067	6.73699e-10	-0.000183453	0.618781	0.00114435	0.0214959	-0.000719267	0.30783	-0.00134313	0.198442	0.00227186	0.0218287	-0.00302812	0.00538815	-7.89259e-05	0.947847	0.000450377	0.70358	1	0.801887
50140	ENTPD5	-0.116814	6.74319e-53	0.00184501	0.0822485	0.0011459	1.90106e-18	0.0702811	1.04457e-236	-7.88096e-05	3.05514e-06	0.000368765	1.96575e-21	-0.00084502	1.48727e-30	0.00022148	0.0256018	0.000329924	0.0189533	6.06198e-05	0.77093	0.000107601	0.585838	0.000294157	0.175061	0.00015615	0.516233	-0.000171234	0.468034	1	0.801887
44409	LILRA6	-0.362004	1.84862e-43	0.00631799	0.0823393	0.00503945	3.16628e-29	0.0358094	8.62577e-07	-0.000510276	1.15655e-19	-0.0002488	0.0551861	0.00465811	2.44268e-79	-0.000493176	0.137465	-0.00134214	0.00513414	0.000874665	0.213388	-0.00031334	0.636415	0.000933331	0.202991	0.00200591	0.0142783	0.000425874	0.592988	1	0.801887
51279	ART3	0.27104	4.94009e-106	-0.00299415	0.0823777	-0.00136605	1.17927e-10	-0.341586	0	-0.000391155	3.38677e-46	0.000173207	0.00606594	-0.000226478	0.0580694	-0.00111366	5.89831e-12	-0.00142865	3.8345e-10	-0.000895027	0.00854265	-0.00115306	0.000339064	-0.00128646	0.000267022	-0.000249992	0.521867	0.000175562	0.646936	1	0.801887
51112	NID1	-0.14972	3.54751e-28	0.00328803	0.0827975	0.00452642	1.12885e-83	-0.172058	0	0.000285019	2.77372e-21	0.000140502	0.042674	8.4598e-05	0.51916	0.00110994	4.29242e-10	0.00119653	1.86965e-06	0.000359016	0.336732	-0.00103414	0.00345144	-0.000737704	0.0570306	-7.95579e-05	0.852952	0.000650274	0.122884	1	0.801887
44329	CACNB3	0.0477967	0.11328	0.00727635	0.0828496	-0.000720949	0.163723	0.00102461	0.902863	-1.05087e-05	0.871075	-0.000104309	0.484484	0.00153538	6.43022e-08	0.00140059	0.000262879	-0.00191495	0.000541823	0.00121764	0.129504	0.000649999	0.396223	0.000648995	0.442592	0.00155388	0.0999423	0.000830027	0.366159	1	0.801887
44409	ADGRF5	-0.0878318	3.72651e-18	0.00243631	0.0829136	0.00258063	5.38166e-50	-0.1223	0	0.000178337	2.23982e-16	7.33191e-05	0.143583	-2.39705e-05	0.801262	0.00088326	5.83093e-12	0.000716043	0.00011136	0.000214859	0.428839	-0.000885246	0.000546934	-0.000594034	0.0359681	-0.00019641	0.534592	0.00024437	0.427264	1	0.801887
44220	FAM3D	-0.565786	6.44821e-80	-0.00718552	0.0831962	0.0122002	7.228e-125	-0.010253	0.216753	-0.000693361	2.48893e-27	-0.000396145	0.00749306	0.00203608	4.38629e-13	-0.0025757	1.04878e-11	-0.00757934	1.36136e-43	0.00166501	0.0363639	-0.00222363	0.00331473	0.00165155	0.0486536	-0.00407702	1.30626e-05	0.00184894	0.041581	1	0.801887
44025	HGFAC	-0.28331	2.16261e-174	0.00241071	0.0832219	0.00413715	2.81818e-127	0.0592343	6.52853e-100	5.80681e-05	0.00694467	0.000545441	3.83726e-28	-0.000364844	0.000107894	0.000651735	3.29434e-07	0.00021073	0.250407	-0.000180102	0.499038	3.42884e-05	0.892746	5.84934e-05	0.834834	-0.000376781	0.228332	-0.000859841	0.00476348	1	0.801887
44220	ACOT13	0.0982888	0.0149158	0.00972329	0.0832813	-0.00206298	0.00289617	-0.00405731	0.718006	0.000262805	0.0024096	-0.000693248	0.000545816	0.00291381	1.89258e-14	0.00107211	0.0364838	-0.00101498	0.170298	0.00131589	0.22171	0.00213863	0.0368963	0.000375767	0.740324	0.00211782	0.0943207	0.00252673	0.0396564	1	0.801887
43912	PGLYRP2	-0.159042	5.44531e-49	0.00259965	0.0835861	0.00229792	2.69011e-35	-0.00466235	0.120566	2.49317e-05	0.280599	0.00012708	0.0172453	0.000312091	0.00212395	0.000345051	0.0122021	-0.000634572	0.00132414	0.000389485	0.174037	-0.000747674	0.00647045	-0.000767422	0.0112601	-6.35495e-06	0.985018	-0.000130527	0.69126	1	0.801887
51505	IDUA	-0.300328	1.89779e-72	0.00402077	0.0836357	0.00424211	8.71378e-50	0.0589199	1.04311e-36	7.761e-05	0.0355175	-0.000897401	2.52867e-26	0.00241139	4.37558e-51	0.000245126	0.258201	-0.000854792	0.00543106	0.000535292	0.24364	0.00198404	4.30684e-06	-0.000620305	0.191601	-0.000388934	0.46042	-0.000718903	0.162855	1	0.801887
49871	VSTM1	-0.0066235	0.706558	-0.00423804	0.0839317	0.000668474	0.0267403	-0.0305975	4.66258e-10	-0.000766475	2.40119e-86	-0.000425312	1.88532e-06	0.000758963	7.41301e-06	3.94691e-05	0.862714	0.00144716	8.3862e-06	-0.00093566	0.0517363	0.000607804	0.182845	-0.00125703	0.0121589	8.07453e-06	0.988425	-0.00203983	0.000185907	1	0.801887
43555	TCN1	0.0288309	0.0166472	-0.00288963	0.0840632	-0.000762132	0.000224723	0.0421273	3.12184e-36	0.0005273	7.23193e-92	-0.000133592	0.0250072	-7.51108e-05	0.507717	0.00104349	9.60168e-12	0.00204122	2.28632e-20	-0.000676304	0.0339167	0.00012669	0.678008	-0.000261692	0.436649	-0.000667236	0.0767092	-0.00161683	9.94007e-06	1	0.801887
42978	DGCR6	-0.0304282	0.0530063	-0.00377505	0.0845658	0.00147321	4.70289e-08	-0.0129446	0.00310133	2.53938e-05	0.451693	0.000119903	0.123857	0.000222197	0.134048	0.000239021	0.231232	-0.00018817	0.514487	0.00119326	0.00401834	0.000186596	0.641201	0.000412035	0.349868	-0.00124801	0.0111076	-0.000503	0.295112	1	0.801887
43434	SNX15	-0.0222142	0.260682	0.00473645	0.0846828	0.00179314	1.21201e-07	-0.118237	3.49447e-102	-0.000179476	2.22069e-05	-0.000150804	0.122335	0.000707498	0.000140619	-0.000285251	0.257526	-0.000933888	0.00975142	0.00202305	0.000128718	0.000579383	0.247324	0.00126351	0.0222755	-0.000106261	0.864019	0.000465193	0.437622	1	0.801887
51291	TNFSF13	-0.704931	0	0.00229739	0.0848232	0.0124079	0	0.0158573	2.8729e-09	-0.000163249	1.34088e-14	0.000141307	0.00367789	0.000591338	1.38983e-10	0.000191989	0.123779	-0.000528211	0.00277133	-0.000585237	0.0270848	-0.000565848	0.0230807	-0.000882645	0.00126678	-0.000100111	0.740591	-0.000356455	0.229661	1	0.801887
44220	DNAJC9	-0.16179	5.02573e-09	0.00662376	0.0851393	0.00470162	4.15232e-23	-0.182019	8.69084e-123	0.000200381	0.000735385	-0.000844827	7.90702e-10	0.00180742	4.16222e-12	0.000584112	0.0963632	-0.000848128	0.0945336	0.000524884	0.476928	0.00072874	0.299428	0.00114611	0.140211	-0.000603167	0.486874	0.00113352	0.178065	1	0.801887
50140	PON2	0.0339703	0.00719715	-0.0030308	0.085168	-0.000357015	0.0995584	-0.03711	7.64512e-26	-0.000210892	5.07602e-14	-0.000109638	0.0881542	6.3175e-05	0.604224	-0.0004018	0.0146059	0.00143585	7.40963e-10	-3.00653e-05	0.930607	0.000696173	0.0335158	-0.00033746	0.348153	0.000302904	0.447626	-0.000569369	0.145647	1	0.801887
51228	ERBB4	-0.33734	0	0.00208074	0.0852631	0.00530608	6.50819e-276	0.070704	3.48414e-186	0.000469517	9.49317e-132	0.000537521	5.88481e-34	0.000168982	0.0435607	0.000180308	0.110097	0.000169339	0.289721	0.000219993	0.358793	0.000456804	0.0420479	-0.000261713	0.289956	0.000762748	0.00534412	-0.000539761	0.0443207	1	0.801887
51000	SORT1	-0.353579	7.84364e-154	0.00319798	0.0853188	0.006438	6.11336e-173	0.00662881	0.0750194	-0.000499546	1.03842e-63	0.000330101	1.1752e-06	0.000567373	1.04321e-05	0.000495854	0.00448141	3.2935e-05	0.893544	0.000269019	0.464786	-2.23262e-05	0.948677	-0.000604159	0.112769	0.000517123	0.219889	0.000734667	0.0761822	1	0.801887
44220	FKBPL	-0.0439097	0.0372357	0.0050348	0.0858307	0.00216308	2.21521e-09	-0.0713743	5.19343e-34	0.000237692	1.46914e-07	-0.000447479	1.91759e-05	0.00129152	7.92313e-11	0.000471325	0.0782027	-0.00117671	0.00232726	0.000494775	0.378809	0.000484883	0.364765	0.000289571	0.624698	0.000624701	0.344516	-0.000468937	0.464557	1	0.802091
50116	MILR1	-0.478677	1.94283e-153	0.00432376	0.0858893	0.00754429	4.86871e-130	0.14812	5.90101e-188	2.56305e-06	0.949024	-0.00061969	1.70562e-11	0.000640732	0.000238678	0.00177153	4.52252e-14	-0.00106684	0.00137702	0.00142085	0.00400572	-0.000283212	0.544853	0.000234386	0.648983	0.00118061	0.0389219	0.00135721	0.0151288	1	0.802091
44220	EGFLAM	-0.215085	1.16634e-85	0.00260843	0.0864593	0.00346628	7.32343e-76	0.0682782	9.62024e-111	-0.00018354	5.39745e-15	6.51672e-05	0.230447	0.000145461	0.158245	-0.000375769	0.00683447	-0.00124099	6.21027e-10	0.000374656	0.199223	-0.0014922	7.78537e-08	0.000565316	0.0658095	0.000654304	0.0564949	-0.00012713	0.702501	1	0.804842
43863	CFHR5	-0.169524	8.05339e-30	0.00355318	0.0868205	0.00286116	6.27394e-29	-0.0268912	9.52428e-11	0.00017451	5.13762e-08	0.000806429	1.13436e-27	0.000878739	4.08331e-10	0.0012543	4.17263e-11	0.000260206	0.341011	-0.000737506	0.0638001	0.000745189	0.0493375	8.99789e-05	0.829776	-0.00107934	0.0206725	0.000954537	0.0357573	1	0.805639
50999	ITGA6	0.23645	1.48554e-36	0.0044599	0.0873888	-0.00321334	1.39981e-23	0.0218103	3.02492e-05	-0.000335264	7.24349e-16	-0.000142934	0.133348	0.000681863	0.000157223	0.00089696	0.000242026	-0.0011905	0.000576729	0.000286288	0.577813	0.000600511	0.215917	-0.000388511	0.466396	-0.000920496	0.119643	0.000521477	0.368643	1	0.806189
51076	IGFBPL1	-0.90817	0	-0.00289856	0.088031	0.0159563	0	0.0519607	1.70741e-52	-0.000304192	2.96372e-29	-1.23541e-05	0.842393	0.000516872	1.13682e-05	0.000826448	2.23154e-07	0.000231042	0.304517	2.91839e-05	0.930922	-0.000161171	0.611438	6.73173e-05	0.846811	-0.000536013	0.164061	-0.000159206	0.67439	1	0.806189
49867	CHAC2	0.07837	0.000282	0.00513184	0.0881954	3.2238e-05	0.930567	-0.0726796	1.80897e-33	-0.000192008	5.73393e-05	-0.000343846	0.00172494	0.000659078	0.00152844	-0.000138243	0.621123	-0.000586727	0.141251	0.000533403	0.367291	-0.000531693	0.340996	-0.000298328	0.627652	-0.0014693	0.0314872	0.000616919	0.354948	1	0.806189
50832	SPON2	-0.517457	0	-0.00300599	0.088198	0.00918308	0	0.0354346	1.15058e-23	0.000462563	8.50551e-61	6.16552e-05	0.338508	0.00119297	1.52726e-22	0.000913025	3.52572e-08	0.00108553	3.35494e-06	-3.5131e-05	0.919737	0.000399202	0.225197	0.00024959	0.489496	-6.11872e-05	0.878311	0.000593698	0.130728	1	0.806189
51082	PEBP1	-0.0406129	0.0544164	0.00501242	0.0883129	0.00258772	8.90848e-13	-0.151434	1.02995e-144	0.000427343	5.75169e-20	-0.000624005	5.64886e-09	0.00148267	2.87157e-13	0.000447723	0.102326	-0.000270719	0.486759	0.00135292	0.0201819	0.000755806	0.167524	0.000636744	0.291143	-0.000670194	0.315666	0.00120762	0.064927	1	0.806189
43195	DTX2	0.247923	6.22281e-28	0.00534825	0.088807	-0.00324535	6.07222e-17	0.106519	3.54421e-64	-0.000490988	4.51674e-24	0.000273007	0.0146168	-0.000221268	0.298456	4.99775e-06	0.98613	-0.000823121	0.0468673	0.000318677	0.593667	-0.00103493	0.0714326	0.000176968	0.779484	-0.000918439	0.193437	-0.000769525	0.264008	1	0.806189
44480	LYVE1	-0.0777604	5.05437e-29	-0.00164429	0.0891388	0.000732336	8.18345e-10	0.0754812	0	0.000193547	1.42641e-38	-7.66365e-05	0.0258862	0.000618097	3.55583e-21	4.67907e-05	0.597052	-0.000671263	1.38895e-07	0.000687648	0.000207368	0.000336691	0.0566837	0.000375512	0.0544705	0.000160713	0.460448	0.000497792	0.0186575	1	0.806189
44300	CASP7	-0.00250148	0.93313	0.0070473	0.089349	0.000196934	0.700171	-0.0173632	0.0363462	0.000302879	2.24255e-06	0.000140239	0.341461	0.00136789	1.08142e-06	0.00105175	0.00549542	-0.00118831	0.0296991	0.00111095	0.161503	0.000582231	0.441387	-8.09102e-05	0.922845	0.000736302	0.430411	0.000780024	0.389776	1	0.806189
51279	TNC	-0.314805	1.82877e-76	0.00401812	0.0896609	0.00551566	9.7871e-80	0.0395033	7.94683e-17	-0.000829659	2.54606e-107	0.000137419	0.112928	-0.000472616	0.00398546	0.00106128	1.79295e-06	-0.000474651	0.129862	-0.000104059	0.823835	0.0013928	0.00162449	0.00156627	0.00123207	0.000136536	0.798973	-0.00139627	0.00800094	1	0.806189
44220	NFU1	0.0708193	0.0524283	0.00860136	0.0902345	-0.00101993	0.103439	-0.0239999	0.018177	0.000831236	2.77166e-26	-0.000579444	0.0013967	0.00269259	5.08929e-15	0.00141193	0.00232157	-0.000401612	0.548524	0.0013294	0.172217	0.00239413	0.00978631	0.000295212	0.773413	0.00278478	0.0149929	0.00203159	0.0673807	1	0.806189
50510	FRZB	-0.13674	2.35974e-49	0.002181	0.0905441	0.00284369	1.28232e-71	-0.0966789	6.54588e-303	-0.00117157	0	-0.000349577	8.33322e-14	-0.000416289	2.78358e-06	-0.000320684	0.00782518	0.000316776	0.0632154	0.000494312	0.0508077	0.000687389	0.00422035	-0.000111208	0.672678	0.000133226	0.648464	-0.000468152	0.103159	1	0.806189
51518	STC1	-0.411312	8.63073e-145	-0.00377422	0.0906768	0.00986877	1.14592e-279	-0.186559	0	0.000926531	3.71639e-150	5.26634e-05	0.517619	0.00127728	1.32741e-16	0.0011043	1.17229e-07	0.00210484	1.04429e-12	0.000935242	0.0343553	3.99786e-05	0.923318	-8.24116e-05	0.856855	0.00132773	0.00863875	-0.000676523	0.173189	1	0.806189
43526	HRAS	0.436176	1.18066e-35	0.00821592	0.091024	-0.0027999	3.06341e-06	0.00149923	0.877529	-0.0001221	0.102921	-0.000167582	0.333137	-2.42356e-05	0.941436	-0.000720963	0.10585	-0.000289895	0.651184	-4.51227e-05	0.961319	0.000251734	0.777235	-0.000190055	0.846396	-0.000424223	0.698418	-0.000572527	0.59262	1	0.806189
42820	MUCL3	0.117651	4.94627e-14	0.00366754	0.0911826	-0.00114049	2.06201e-05	0.0347701	1.23405e-15	5.51155e-06	0.868661	0.000128937	0.0923837	0.000210985	0.148171	-0.000265903	0.179544	-0.000238386	0.404931	0.00016528	0.688229	-0.000124561	0.753388	0.00058189	0.182746	-0.000998777	0.0409391	0.000535226	0.261464	1	0.806189
51291	B4GALT1	-0.254586	7.17852e-147	-0.00231036	0.0919098	0.00538252	1.88441e-221	-0.0796462	1.39959e-183	-0.00032041	7.54066e-49	-3.41309e-05	0.495062	0.000673382	1.1952e-12	5.19815e-05	0.68529	-0.000738113	4.78647e-05	-0.000544977	0.045326	4.47599e-05	0.861247	0.000115572	0.68146	-0.00032236	0.299866	0.00105119	0.000571516	1	0.806189
44480	FN1	-0.147418	4.67497e-52	0.00227211	0.0922895	0.00326419	2.33558e-85	-0.0602402	8.94877e-110	9.27542e-05	8.02684e-06	8.69829e-05	0.0699531	-0.000169948	0.0626056	0.000307979	0.0126471	0.000832096	2.88438e-06	0.000113114	0.661841	0.000966568	8.83569e-05	-0.000725558	0.00774852	-0.000649917	0.0324297	0.000680914	0.0211144	1	0.806189
50371	S100A12	-0.342163	2.07735e-36	0.00635473	0.092772	0.00775811	2.94419e-62	-0.163428	9.23376e-103	-0.000325176	5.70435e-08	0.000350505	0.0109421	0.00087073	0.000869797	-0.000193522	0.582406	0.00167754	0.000815473	0.0010844	0.155841	-0.000152951	0.82753	0.00133368	0.0859211	-0.00549343	1.57373e-10	-0.00345363	4.04592e-05	1	0.806189
49871	EPHA10	0.0580833	0.0122131	-0.00542315	0.0932026	0.000481806	0.225517	0.0203845	0.00162739	-0.000150273	0.00331946	-2.74833e-05	0.815168	-0.000355314	0.111236	0.00021349	0.477724	-0.000168731	0.693346	-0.0001826	0.773214	-1.15663e-05	0.984649	0.000445727	0.49973	-0.000177561	0.808656	-0.00016382	0.819762	1	0.806189
42198	C3	-0.135042	2.39248e-15	0.00398562	0.0932175	0.00313413	9.06469e-27	-0.00792222	0.0947455	0.000470025	5.77393e-38	-5.92283e-05	0.482812	0.00165888	4.61416e-25	0.00151011	4.00479e-12	-2.25835e-05	0.942326	0.000685733	0.132228	0.00153	0.000431777	-0.000132259	0.78249	0.000228688	0.669201	-9.18073e-05	0.859412	1	0.806189
51336	DSG3	0.47091	0	-0.00284283	0.0932503	-0.00586598	1.77754e-173	-0.252902	0	-0.000445148	2.10585e-61	0.00058345	2.9636e-21	-0.00014384	0.218257	-9.0268e-05	0.567982	0.00270325	1.66636e-33	0.00062539	0.0612447	0.000744493	0.0179172	-0.00118595	0.000606021	-0.000933944	0.0150266	0.00144161	0.000121272	1	0.806189
51129	CCL4	-0.604442	2.93082e-143	0.0055268	0.0934357	0.0124492	3.57605e-205	-0.068038	6.78967e-25	0.000546421	1.82002e-25	0.000363545	0.00252763	-0.000151525	0.506174	0.000296216	0.33684	0.00270071	6.19047e-10	-0.000200371	0.75927	-0.00180062	0.00345606	-0.00159643	0.0183119	0.000483452	0.517687	0.000116958	0.8733	1	0.806189
43195	MDM1	0.00377302	0.733855	0.00257982	0.09438	-0.00010844	0.568864	0.00964733	0.00176797	-5.25611e-05	0.0271849	-0.000223417	4.66745e-05	0.000230641	0.0272102	4.48635e-05	0.750488	-0.000604497	0.00293664	0.000279742	0.33989	-0.000196953	0.484482	0.00032564	0.293767	-0.000260614	0.452056	-0.000278463	0.410134	1	0.806189
43195	TTF2	0.118221	1.93436e-11	0.00409331	0.0944618	-0.00132883	1.08991e-05	-0.00221044	0.651683	9.28262e-05	0.0139724	-0.000621354	9.76798e-13	0.00122604	1.41288e-13	0.000285425	0.202399	-0.00211237	5.84824e-11	0.000199635	0.667813	0.000507667	0.256188	-0.000107045	0.827849	0.000684162	0.213544	0.000452777	0.398748	1	0.806189
51205	TNFRSF10C	-0.257521	5.16768e-48	-0.0041164	0.0945947	0.00337642	8.41265e-29	0.00392875	0.425562	0.000529597	1.12187e-41	0.000655607	4.14842e-13	0.00016463	0.336591	-0.000733315	0.00154528	0.00182583	2.17326e-08	-0.000128173	0.794404	0.00105002	0.0223108	-0.000883139	0.0808796	-0.0008626	0.122245	-0.00216318	8.14631e-05	1	0.806189
44414	LCP1	-0.11393	2.52689e-11	0.0039673	0.0947877	0.00271931	1.68284e-20	0.0798494	3.30545e-63	0.000696086	1.6918e-80	0.000868978	9.54606e-25	-0.000271387	0.0915292	-3.48898e-05	0.872169	-0.000500506	0.110112	0.000383063	0.399572	0.00109932	0.0110832	0.000938145	0.0498706	0.00198435	0.000205091	0.0007067	0.173635	1	0.806189
44448	TGOLN2	-0.306446	1.37259e-238	-0.00213711	0.0959576	0.00553499	5.69389e-264	-0.00895146	0.000490883	-0.000441615	3.07529e-109	0.000678105	1.74701e-49	0.000638121	2.27239e-13	0.000687329	5.04986e-09	-0.000383669	0.0233627	-0.000661442	0.00715576	7.98772e-05	0.733256	-0.000451269	0.0810497	2.54072e-05	0.929896	0.000294049	0.295756	1	0.806189
50830	CCL28	-0.594828	3.88161e-174	0.00488159	0.0965164	0.0108529	1.47779e-196	0.105225	2.81522e-71	0.000754475	2.01431e-58	-0.00177876	1.86821e-61	0.00209006	8.71971e-25	0.00173526	2.73491e-10	0.00169534	1.35234e-05	0.000751124	0.19412	-0.00194105	0.000378158	-0.000785364	0.190636	0.00139481	0.0363185	0.000890565	0.172241	1	0.806189
44220	DNM1	-0.0362965	0.36954	0.00932988	0.0971622	-0.00171904	0.0132357	0.101875	1.47858e-19	0.00108012	1.62734e-35	-0.000749672	0.000190311	0.00323983	1.93001e-17	0.00208429	4.94531e-05	-0.00212132	0.00423047	0.00125395	0.245118	0.00191658	0.061939	-0.00201816	0.0756282	0.00160817	0.204781	0.00213787	0.082309	1	0.806189
51133	QPCT	-0.110132	6.49088e-30	-0.00223663	0.0973181	0.00215294	2.33177e-38	-0.0408381	1.77892e-51	-0.000602378	1.31809e-172	0.00139578	1.09014e-173	0.00206034	1.89617e-106	-1.17192e-05	0.926296	0.000324018	0.0698601	-0.00165468	5.16199e-10	0.000690255	0.00611362	0.000340613	0.217556	-0.000743498	0.0150099	0.000636791	0.034092	1	0.806189
42978	HTR1B	0.0684971	7.60067e-06	0.0035304	0.0973566	-0.000271003	0.301666	0.0129173	0.00241941	-0.000134644	4.1155e-05	0.000120866	0.110885	-9.53483e-05	0.508729	7.86803e-05	0.685451	-0.000293178	0.296558	0.000469974	0.24421	-0.00113506	0.00357538	-0.000267274	0.533121	-0.000920584	0.0542115	-0.000139737	0.764989	1	0.806189
51291	FGF19	-0.566403	5.12852e-92	0.00642051	0.0974046	0.00929397	1.91876e-84	0.106064	1.74674e-42	0.000176801	0.00408623	0.000814725	8.27335e-09	-0.00133487	6.17325e-07	-0.00107209	0.0030985	-0.00117526	0.0219528	-4.74109e-05	0.95086	-0.00192361	0.00785412	-0.00100344	0.207221	0.000526129	0.549298	0.000828693	0.336494	1	0.806189
44480	C1R	-0.0607162	3.84488e-19	0.00156372	0.0978552	0.00104759	2.40503e-19	0.0166598	1.18082e-18	-0.000110799	2.57721e-14	2.18637e-05	0.515159	0.00024952	9.39633e-05	3.82707e-05	0.657962	3.59762e-05	0.772531	0.000186247	0.303518	0.000284606	0.0990502	-2.02918e-06	0.99151	-0.000139809	0.510883	-9.56012e-05	0.643663	1	0.806189
42948	CPTP	0.134276	5.27578e-21	0.00329056	0.0979822	-0.0016712	8.89837e-12	0.0371695	8.81661e-21	-0.000134149	1.09678e-05	0.000220628	0.0017112	0.000169993	0.204381	9.33239e-05	0.606599	-0.000836891	0.00141221	0.000295512	0.432161	-0.00031475	0.385024	0.000349273	0.381896	-0.000650606	0.144903	0.000292944	0.500966	1	0.806189
44448	NRGN	0.0658069	0.0426279	0.00746313	0.0981558	-0.00133158	0.0167765	0.0079187	0.380349	-3.43593e-05	0.622126	-0.000381032	0.0179459	0.00135038	1.01193e-05	0.000864289	0.036491	-0.00170106	0.00423843	0.000217761	0.801118	0.00173487	0.0352368	-0.000948412	0.29691	0.00167362	0.0992384	0.000766106	0.438367	1	0.806189
44409	UBE2L6	-0.306551	8.06712e-44	0.00506956	0.0982779	0.00680383	4.827e-72	-0.0780149	5.6009e-37	-0.000230774	1.12653e-06	-0.000307012	0.00501577	0.0014594	2.2198e-12	0.00101707	0.000280573	-0.00115794	0.00419017	0.00069711	0.239529	0.000157381	0.778257	0.000218968	0.723167	0.000497913	0.470705	0.000112132	0.867439	1	0.806189
50678	NMNAT1	-0.350233	4.10009e-39	-0.00616066	0.0983601	0.00924759	5.28853e-90	-0.188106	3.22668e-139	-4.5659e-05	0.440792	-2.85072e-05	0.833427	0.00107752	2.77909e-05	0.000115821	0.739916	0.00188898	0.000128287	0.00155792	0.0335433	0.000843308	0.225081	0.00173893	0.0224839	-0.00480246	1.36662e-08	-0.00378083	5.3411e-06	1	0.806189
44300	DXO	0.024826	0.126879	0.00373767	0.0985963	0.000437071	0.117185	-0.0458753	3.99537e-24	9.08761e-05	0.00926933	-0.000315475	8.76136e-05	0.000953082	4.73507e-10	0.000162694	0.431075	-0.000521379	0.0803528	0.000788585	0.0684946	0.000187439	0.649591	0.000533558	0.241684	-0.000751989	0.139889	0.000900719	0.0686874	1	0.806189
50116	RABGAP1L	0.158095	4.95946e-13	0.00502627	0.0988979	-0.000929713	0.0131925	-0.107004	1.25381e-68	-7.15272e-05	0.140305	-0.000476821	1.86701e-05	0.00120023	1.28496e-08	0.000122025	0.667428	-0.00122222	0.00244857	0.000918159	0.124278	0.000557585	0.324478	0.000510191	0.412833	-0.000347122	0.615777	0.000272469	0.686869	1	0.806189
44135	NAP1L4	0.047548	0.00135773	0.00340119	0.0992392	-0.000883404	0.000521248	-0.0619808	8.50633e-51	6.278e-05	0.0485173	-0.000271846	0.000224084	0.000536848	0.000122188	0.000241875	0.19891	-0.000967244	0.000377594	0.000358198	0.365174	0.000516634	0.169992	0.00119971	0.00398654	-0.000716888	0.123287	0.000126656	0.779081	1	0.806189
50836	PPME1	0.132059	1.87842e-09	0.00504421	0.0995311	-0.00107356	0.00439441	-0.155191	2.71647e-140	8.87441e-05	0.0677564	-0.000570177	3.28613e-07	0.000900669	2.12636e-05	-1.42297e-05	0.960243	0.00018761	0.643752	0.00119142	0.0537899	0.000867741	0.126847	0.00101313	0.107206	-0.000917153	0.187093	-0.000134345	0.843572	1	0.806189
43602	PTTG1	0.0311263	0.033309	0.00334843	0.0996163	-0.000438394	0.0806085	0.00563184	0.166333	2.28415e-05	0.465756	6.89192e-05	0.341593	0.000158141	0.251984	-2.26905e-05	0.903135	0.000250203	0.350671	0.00017672	0.649956	0.00015754	0.672184	0.00022973	0.575763	-0.000206203	0.652572	0.000293149	0.512639	1	0.806189
44409	PDAP1	0.0228167	0.510834	0.00794029	0.0997597	-0.000394232	0.507764	-0.0216409	0.0249542	-0.000215577	0.00384054	-0.000531321	0.00202283	0.00144923	9.33725e-06	0.00144969	0.000997019	-0.0018144	0.00434289	0.00126445	0.175065	0.00147386	0.0936846	-0.000442026	0.649434	0.00163613	0.13189	0.00102463	0.332293	1	0.806189
49867	SORCS2	-0.891154	0	-0.00289325	0.0998578	0.0160211	0	-0.0124037	0.000424317	-0.000649823	1.44708e-119	-0.000318175	6.90653e-07	0.00138862	3.18028e-30	-4.91376e-05	0.763609	0.000569357	0.0145327	-0.000376009	0.276617	0.000438479	0.178861	0.000403718	0.261165	-0.000705864	0.0769136	-2.17821e-05	0.955412	1	0.806189
43434	GLRX5	0.0852241	0.00705424	0.00723453	0.100109	-0.000200163	0.712215	-0.0391031	8.86217e-06	0.000742356	6.81493e-28	-0.000255228	0.102528	0.00180937	1.2134e-09	0.00172482	1.91646e-05	0.0005887	0.309009	0.00109943	0.193826	0.00223626	0.00530436	-0.000266319	0.763554	0.00170377	0.0864298	0.000689814	0.472335	1	0.806189
51291	SPINT2	-0.356701	6.57197e-132	0.003327	0.101047	0.00727887	1.65111e-185	-0.0903728	4.43951e-109	-0.000491405	2.60502e-52	-0.000157396	0.0335242	0.00133695	1.57008e-21	0.000462718	0.0148004	0.000175324	0.514049	0.000174271	0.665405	-0.000308482	0.415713	-0.000729407	0.0800693	0.00110397	0.0164519	0.000716688	0.11254	1	0.806189
44409	FCAMR	-1.2491	0	0.0062222	0.101312	0.0205166	0	0.238068	3.47927e-213	0.00135943	5.82017e-118	-0.00052328	0.000112549	0.00194785	3.86574e-14	-0.000969616	0.00516571	-0.00151255	0.00252503	0.00125927	0.0862315	0.00313621	5.87998e-06	0.0017543	0.0219299	-0.00123603	0.148198	0.00148592	0.0740964	1	0.806189
51082	SUSD2	-0.497881	0	0.00242304	0.101555	0.00915867	0	-0.013055	1.07121e-05	-0.000490049	3.23033e-96	4.83197e-07	0.992844	5.65471e-05	0.579947	0.000797713	7.30706e-09	0.000745403	0.000141616	-1.43318e-05	0.960996	-0.000893252	0.0011887	0.000832676	0.00608266	0.00127781	0.000143685	0.000141579	0.667159	1	0.806189
43195	GBA	-0.129559	2.77923e-11	-0.00442323	0.10186	0.00233033	2.91853e-12	-0.0249879	3.85426e-06	-0.000260049	4.59419e-10	4.06236e-05	0.67278	0.000260136	0.15536	0.000225682	0.361538	6.83198e-05	0.847937	-0.00081929	0.110861	-0.000239402	0.627873	0.00021462	0.693068	-0.00120117	0.048048	0.000695432	0.240671	1	0.806189
43434	SPINK2	0.0326951	0.01354	-0.00301229	0.101927	0.00296545	6.99122e-39	-0.339786	0	0.00158483	0	0.000994606	4.81925e-52	0.000597217	1.64079e-06	0.000500349	0.00305357	-0.000652602	0.00706127	0.000550028	0.120452	0.00076409	0.0228653	-0.000756513	0.0412223	-0.00110388	0.00796254	0.00183197	5.13915e-06	1	0.806189
44300	SH3GLB2	-0.107577	8.90877e-06	0.00550817	0.102101	0.00337776	4.33882e-16	-0.150378	9.93961e-110	0.000587327	1.53425e-29	-0.000604248	4.52141e-07	0.0009623	2.40555e-05	0.000613103	0.0462965	0.000163955	0.711895	0.00105059	0.103103	-0.000223145	0.716412	0.00165545	0.0147039	-0.000796271	0.293802	0.0010455	0.155849	1	0.806189
50140	DCN	-0.607593	0	-0.00183484	0.102597	0.0113175	0	-0.0487891	1.51629e-103	0.00033224	7.52018e-77	0.000306499	8.34322e-14	-4.2201e-05	0.587582	-7.96293e-05	0.448411	-0.00101828	7.96549e-12	4.78881e-05	0.828009	-0.000666099	0.00144319	0.000351658	0.125691	-0.000153125	0.547645	0.000459885	0.0656392	1	0.806189
44201	ENOPH1	0.105196	5.2186e-08	0.00438218	0.102649	-0.000502325	0.12962	0.0133211	0.0132031	-0.000193502	2.93633e-06	0.00022709	0.0175095	-0.000363765	0.0452963	-0.000133535	0.586922	-0.00133422	0.000166256	-0.000537997	0.295597	-0.00058732	0.231961	-0.000567347	0.295773	-0.000293706	0.627596	-0.000335524	0.568377	1	0.806189
42948	ATP1B1	0.144384	6.44811e-17	-0.00392707	0.102696	-0.00147005	7.02916e-07	-0.0143124	0.00291704	-0.000254017	6.00809e-12	0.000292877	0.000580879	-0.000218808	0.177022	-0.000223858	0.307389	-0.000984433	0.00191588	-0.000316433	0.48701	-0.000733349	0.0944191	-0.000744218	0.123646	0.000279294	0.605053	0.000460979	0.381508	1	0.806189
44201	ENSA	0.103283	2.66684e-08	0.00420407	0.103207	-0.00101511	0.00143659	4.16338e-05	0.993568	-0.000157043	7.85394e-05	-0.000240005	0.00897355	0.000543979	0.00183743	0.000374682	0.112643	-0.000694375	0.0414007	0.000308028	0.533154	2.55524e-05	0.956839	-0.00033138	0.525084	0.000664087	0.253671	0.000180259	0.749776	1	0.806189
44329	HJV	-0.0208738	0.190808	0.00360988	0.103616	0.00106729	9.63984e-05	-0.0253847	1.07566e-08	-7.53669e-05	0.0276958	-2.7606e-05	0.726355	0.00115886	1.18828e-14	0.00127875	2.94777e-10	0.00077219	0.00832593	8.29494e-05	0.845113	0.000999018	0.0136497	-0.00105678	0.0180363	-0.0010073	0.0436723	0.00040296	0.406618	1	0.806189
51472	CDSN	-0.244918	7.02854e-58	-0.00346133	0.103752	0.00542522	3.83498e-95	-0.103904	9.73361e-131	-0.000734479	5.7663e-104	-0.000249843	0.00127455	0.00247147	3.03791e-63	0.000825589	3.25204e-05	0.00149501	1.10349e-07	-0.00169115	5.7439e-05	-0.00079215	0.0448719	-0.00021539	0.620232	-0.000189215	0.694607	0.000965425	0.0405935	1	0.806189
42948	ARL2BP	-0.0430872	0.00289312	0.00327065	0.104606	0.00129954	1.63949e-07	-0.00262978	0.513726	3.69059e-05	0.232553	-0.000174982	0.0141079	0.000575957	2.20821e-05	0.000521279	0.00453923	-0.00088684	0.000844327	0.000832956	0.0289111	0.000241906	0.510029	-0.000115526	0.775344	-0.000145592	0.747528	3.87466e-05	0.93001	1	0.806189
44220	DDX1	0.276939	3.88205e-54	0.00401761	0.105548	-0.00375062	1.95788e-34	0.02284	4.28264e-06	-0.000327323	1.28864e-17	0.000176215	0.0468574	1.5747e-05	0.925404	-0.000274527	0.225793	-0.000594198	0.0694362	0.000209158	0.660448	7.53233e-05	0.867968	0.000622725	0.214169	-0.00256056	4.77585e-06	-0.000124593	0.818526	1	0.806189
49867	ADCYAP1R1	0.0698518	1.57913e-08	-0.00278848	0.105623	-0.000781676	0.000224326	0.000248209	0.942629	-0.000110806	4.99973e-05	-1.99931e-05	0.750259	-0.000191123	0.108429	-5.17764e-05	0.746441	-0.000451366	0.0480682	-0.000341425	0.313472	0.000220142	0.491062	1.98817e-05	0.954975	-0.0005746	0.141777	0.000249186	0.513998	1	0.806189
43805	CTBS	-0.0660906	1.25536e-11	0.002194	0.105667	0.00196945	6.24091e-32	-0.0873474	8.0966e-225	-0.000209435	1.54706e-23	-0.000245077	4.0228e-07	0.000312052	0.000686638	0.000163314	0.189828	-7.13191e-05	0.689931	0.000203828	0.430328	0.000401644	0.104986	-0.000996707	0.000257386	-0.000756949	0.0130213	0.000595188	0.0450814	1	0.806189
41828	OLFM4	-0.640708	9.39901e-48	-0.00991184	0.106059	0.011659	1.81271e-53	-0.19582	3.42902e-57	-0.000596172	2.706e-10	-0.000237509	0.276189	-0.00225411	5.84749e-08	0.00241323	1.81465e-05	0.00178176	0.0273499	0.000158431	0.894919	-0.00197357	0.077567	-0.000111076	0.92854	-0.00358754	0.00939749	-0.00275467	0.0394265	1	0.806189
44329	GRIK2	-0.0913593	6.48067e-10	0.00331896	0.106301	0.00241626	1.66788e-21	0.0420352	1.68639e-24	-7.05384e-06	0.824007	0.000213356	0.00351	-0.000318095	0.0221987	0.000629585	0.000811045	0.00081983	0.00249957	-0.000165669	0.673679	-0.000391371	0.297023	-0.000341808	0.409052	-1.78195e-05	0.969277	0.000252327	0.574904	1	0.806189
41890	PSTPIP2	-0.197597	3.19034e-07	0.00867184	0.106656	0.00195529	0.0031827	-0.010355	0.335606	-0.00039351	2.05324e-06	-0.000661697	0.00055683	0.00252128	4.6958e-12	0.000844091	0.0868072	-0.00453561	1.43283e-10	0.00105616	0.303638	0.00152263	0.120317	0.000120253	0.911262	0.0027376	0.0240132	0.00138986	0.236209	1	0.806189
51000	SSC4D	0.788494	1.29274e-69	-0.0100307	0.106879	-0.00129463	0.0908802	-0.980234	0	0.00109031	3.96353e-28	-0.000905439	6.8159e-05	0.00266117	6.56026e-10	-3.84126e-05	0.947552	0.000305526	0.710722	0.00152258	0.216447	0.00614022	1.23529e-07	-0.000134499	0.915996	-0.00384293	0.00645521	-0.00201254	0.146695	1	0.806189
51228	TXNDC15	-0.0499347	2.91101e-07	0.00218847	0.10713	0.00103702	5.24288e-10	0.0187184	5.78208e-12	-0.000441361	5.37701e-93	-0.000355401	8.47916e-13	-8.65415e-05	0.35751	0.00174649	4.21426e-43	0.00102903	1.0275e-08	0.000614503	0.0225069	0.00129403	2.9583e-07	-0.000295358	0.287744	0.000180461	0.557425	0.000407273	0.176771	1	0.806189
43120	GLI2	0.0944585	2.02705e-15	-0.00266616	0.107496	-0.00133097	6.91926e-11	0.0044231	0.181617	-0.000161494	2.40543e-10	0.000174932	0.00307468	-8.56351e-05	0.445271	-3.16875e-05	0.834235	-0.00063049	0.00385114	5.69772e-05	0.856421	-0.00085075	0.00488004	-0.00053057	0.111472	0.000245038	0.510507	-0.000903474	0.0128682	1	0.806189
44220	JPT2	0.0450365	0.146753	0.00693969	0.107828	-0.00107372	0.0437251	-0.0162592	0.0597656	-0.000383256	8.62033e-09	-0.000306769	0.0465682	0.0014826	3.98641e-07	0.00078767	0.0456176	-0.00204082	0.000335192	0.000931774	0.260326	0.00174835	0.026463	-0.000223834	0.797321	0.00105227	0.279532	0.000251233	0.790156	1	0.806189
43434	GP5	-0.00566618	0.660367	0.0028824	0.108059	-0.000588045	0.00785739	-0.000104606	0.976738	-0.000406379	7.25278e-49	-0.00010527	0.0985677	0.00073456	1.42125e-09	0.000344617	0.0361714	-0.000612728	0.00940131	-4.72424e-05	0.891068	0.00072515	0.0265847	-0.000863669	0.0167189	-4.02603e-05	0.920836	-0.000316092	0.419211	1	0.806189
44201	UBE2B	0.0498588	1.32223e-06	0.00230139	0.108124	-0.000429899	0.0150471	-0.0268089	9.23493e-21	-4.34776e-05	0.0489265	-5.68159e-07	0.99111	0.00014231	0.142101	0.000126825	0.33344	-0.000630604	0.000849992	0.00034417	0.209774	-0.00032609	0.213502	6.0935e-06	0.983207	-0.000521128	0.10666	9.35113e-05	0.765699	1	0.806189
50915	PTPRM	-0.207738	7.5112e-124	0.00195869	0.108466	0.0043973	4.6756e-187	-0.068029	4.66416e-169	5.78281e-05	0.00295498	-0.000433244	2.55299e-22	0.000699042	1.24107e-16	-5.82862e-05	0.609851	0.00114186	1.67365e-12	0.000914541	0.000142972	0.00027268	0.22946	0.00119712	1.59594e-06	0.000119418	0.666041	-0.000143336	0.597169	1	0.806189
43434	TPD52L2	-0.137803	0.000349555	0.00859397	0.108893	0.00161434	0.0146166	-0.0439122	4.21498e-05	-7.91829e-05	0.337521	-0.000744674	9.24513e-05	0.0020181	2.62656e-08	0.00120817	0.0139884	-0.00348641	7.64864e-07	0.000833505	0.418802	0.00225226	0.0211876	0.000185604	0.863384	0.00222746	0.0658055	0.00161687	0.166792	1	0.806189
49871	METAP1	0.0574207	6.22888e-08	-0.00236824	0.109217	-0.000888844	1.03612e-06	-0.00317499	0.283565	-7.15156e-05	0.00226299	-4.44193e-05	0.409095	-1.24132e-05	0.903238	-0.000120869	0.37982	-0.000767236	8.95694e-05	0.000131339	0.650639	-0.000189275	0.491485	-0.000497598	0.0997209	0.000175644	0.60071	-4.83577e-05	0.883169	1	0.806189
51076	TSHB	0.0446361	0.104866	-0.00614284	0.109237	0.000315543	0.503871	-0.109349	7.09837e-46	-0.000524414	9.6688e-18	-0.000153099	0.274996	0.000267473	0.314229	0.000243402	0.499153	-0.00163622	0.00127575	0.000745234	0.326762	-0.00130354	0.0687132	-0.00322053	4.23484e-05	-0.000352581	0.685096	0.000453869	0.595684	1	0.806189
51631	ADAM23	-0.259087	1.32438e-95	-0.00278384	0.10932	0.00446306	2.04685e-96	-0.0515775	1.3041e-49	-3.97893e-05	0.150327	-0.000444652	2.38318e-12	0.000724543	1.67206e-09	-0.000177032	0.275004	6.77958e-05	0.768148	8.03662e-05	0.81515	0.000710932	0.027475	-0.000588303	0.0974411	-5.16522e-05	0.895694	0.00102935	0.007567	1	0.806189
42494	GAPDH	-0.0589997	5.59337e-07	0.00262316	0.109581	0.000390616	0.0534368	-0.0513617	4.0433e-55	0.000193818	1.65587e-14	-0.000165711	0.00427793	0.000664717	1.89003e-09	0.000710266	2.42596e-06	-0.000372017	0.0840939	0.000152812	0.632501	0.000799064	0.00745105	0.000167586	0.611708	-0.000280529	0.448276	6.86626e-05	0.847741	1	0.806189
50678	BCAN	0.269721	8.60383e-99	-0.002843	0.109777	-0.0064262	5.44816e-188	0.15805	0	0.000227178	9.07152e-16	0.000107433	0.0965749	-0.000514232	2.74981e-05	-0.0004144	0.0127686	-0.00133546	1.37791e-08	8.25469e-05	0.813334	-8.97895e-06	0.978395	-0.00115617	0.00146708	-0.00100582	0.0126536	-0.000760295	0.0549994	1	0.806189
44201	GLYR1	0.300952	3.17178e-45	0.00473356	0.109783	-0.00300385	2.07251e-16	-0.0200596	0.000711955	-0.000193322	2.26654e-05	0.000111283	0.290935	8.95163e-05	0.654979	0.000104718	0.699156	-0.000518268	0.18457	0.000461302	0.415947	0.000875639	0.10599	0.00153419	0.010334	-0.00209064	0.00173619	-0.000334717	0.605726	1	0.806189
50836	ARSB	0.0794055	6.2946e-05	0.00441295	0.11049	6.52434e-05	0.847953	-0.0902799	1.45732e-59	0.000836115	1.01426e-80	-0.000798648	2.37093e-15	0.00226905	2.0318e-32	0.00119182	3.7692e-06	-0.000998069	0.00643445	0.000520183	0.351032	0.00110517	0.0312812	-0.00052984	0.350788	0.000916746	0.14416	-0.000143363	0.81559	1	0.806189
51505	NPY	-0.636287	1.06512e-157	-0.00527437	0.110699	0.0121077	2.1635e-193	-0.175422	9.33902e-154	-0.000148466	0.00470159	-0.00142551	2.13909e-32	0.00113353	6.61949e-07	0.000371935	0.227887	-0.000673081	0.123851	-0.00138381	0.0341317	-0.000147803	0.809806	-0.0014916	0.0273107	0.00160949	0.0317954	0.000615121	0.40131	1	0.806189
43355	SERPINI1	-0.100421	1.45562e-20	0.00239314	0.111003	0.000877981	2.13946e-06	0.135004	0	0.000254379	4.432e-28	0.000320914	1.78122e-09	0.000289357	0.00437621	0.000159469	0.247125	-0.000718355	0.000276722	-8.31867e-05	0.773197	4.81155e-05	0.860548	-0.00047678	0.11463	-0.00104411	0.00207696	0.000130781	0.689663	1	0.806189
43602	TNPO1	0.0547818	1.32341e-05	0.00278504	0.11117	-0.000894299	3.39986e-05	-0.00189837	0.587396	-2.84296e-05	0.291033	4.95116e-05	0.426842	2.50114e-05	0.833107	-0.000287335	0.0730734	-3.37089e-05	0.883732	-0.00010988	0.742775	-0.000971737	0.00240151	-0.000953083	0.00693512	0.000514393	0.191505	-0.00011129	0.772516	1	0.806189
51505	RSPO3	-0.863075	0	0.0022137	0.111262	0.0149017	0	0.0526716	1.17887e-79	-0.00035321	1.79358e-57	0.000283164	2.10994e-08	0.000568118	3.06848e-09	0.000699579	6.86651e-08	-0.000460069	0.0123471	-1.74853e-05	0.949225	-0.000879316	0.000659351	4.88538e-05	0.863466	0.000973137	0.00201545	0.000934598	0.00241854	1	0.806189
50967	CXCL1	-0.159504	2.3685e-06	0.00749251	0.111421	0.00369755	1.78528e-10	0.099865	3.59574e-26	0.00285154	0	-8.29692e-05	0.629239	0.00126853	9.74741e-05	-0.000362945	0.410184	-6.41371e-05	0.918106	0.000515629	0.580716	0.00127005	0.149009	-0.00137949	0.15374	-0.000967326	0.364944	0.000304762	0.771124	1	0.806189
50999	HSD11B1	0.20316	5.36244e-43	0.00327636	0.111568	-0.00347461	9.17254e-43	-0.0314143	2.69603e-14	-0.000230027	2.32629e-12	0.000660775	1.49946e-18	-0.00144655	3.13901e-24	8.77662e-05	0.649012	0.000331264	0.224828	-0.000862675	0.033574	-0.00122658	0.00136157	-0.000104842	0.803315	-0.000447517	0.337688	-0.00069451	0.129223	1	0.806189
44220	CD101	-0.165875	4.74369e-27	0.00340412	0.111697	0.00249503	3.53795e-21	-0.0283851	3.45456e-11	-2.30894e-05	0.484311	-0.0003837	5.19014e-07	0.00165067	5.55596e-30	-0.000805589	3.75179e-05	0.000302193	0.284182	0.000414841	0.312222	0.00120095	0.0021116	-0.000946039	0.0286147	-0.000165331	0.731886	-0.000336892	0.471788	1	0.806189
49867	TP53	0.0364876	0.0186693	0.00343879	0.111971	-0.000225501	0.396507	-0.037283	7.53603e-18	8.54412e-05	0.0127434	-0.000330483	2.78756e-05	0.000714336	1.76842e-06	8.06835e-05	0.688197	-0.00180999	2.74854e-10	0.000933396	0.0281863	0.000551437	0.169491	-0.000674292	0.127235	0.000334337	0.495947	0.000592805	0.21625	1	0.806189
50957	EGF	-0.103491	0.00503407	0.00815633	0.112798	0.000832793	0.188078	0.000869577	0.932733	4.78362e-05	0.559101	-8.25721e-05	0.660296	0.00224356	2.85211e-10	0.0020704	1.64626e-05	-0.000916675	0.178493	0.00165529	0.108164	-2.66436e-05	0.977852	-0.00174626	0.0989832	0.00117763	0.312969	0.00107945	0.345603	1	0.806189
51291	IL10RB	-0.379216	9.68055e-281	-0.00232671	0.11283	0.00758432	0	-0.0660976	1.71284e-111	-0.000525126	1.06436e-111	-0.00010607	0.0476217	0.0015458	2.41554e-52	-3.6781e-05	0.788797	0.000707249	0.000273272	-0.000142501	0.624886	0.000471302	0.085568	0.000488146	0.105322	-0.0003622	0.276522	0.0011433	0.000465265	1	0.806189
50999	RAB6A	-0.0524668	0.00184077	-0.00372262	0.112997	-0.000512525	0.0760515	0.183423	0	-2.94182e-05	0.431592	0.000554814	9.74846e-11	-0.000449212	0.00567758	-0.000709192	0.00126499	-0.00262219	3.77297e-17	0.000646934	0.162389	-0.00112722	0.00987506	0.000294974	0.539032	-0.00241522	5.74766e-06	-2.64505e-05	0.959602	1	0.806189
44329	ELAC1	-0.0486848	0.107905	0.0066683	0.113155	0.000989044	0.0568884	-0.0659023	5.23702e-15	-0.000310416	1.77596e-06	-0.000557929	0.000194035	0.00172898	1.29839e-09	0.000970727	0.0117019	-0.00209523	0.000161815	0.000698598	0.385985	0.000593809	0.439838	-0.000462543	0.585469	0.00115368	0.223461	0.000389958	0.672181	1	0.806189
42948	ITPA	0.244153	5.9748e-24	0.00532794	0.113753	-0.00259231	4.15794e-10	-0.131782	5.72087e-85	7.70969e-05	0.135731	-0.000102109	0.391527	0.00144791	1.77434e-10	0.000930982	0.00242846	-0.000318424	0.473381	0.0019668	0.00202962	0.00157145	0.010466	0.000249921	0.711878	0.000813036	0.282215	3.34547e-05	0.963815	1	0.806189
51112	THBS4	-0.640033	0	0.00369969	0.115132	0.0103969	2.80892e-280	0.0921705	2.77416e-85	0.00037069	2.72294e-23	0.000541507	2.89035e-10	0.00031958	0.0493376	0.00179527	3.64676e-16	-0.000469726	0.130852	0.00195988	2.30877e-05	0.000272643	0.533704	0.000317923	0.507947	0.00100547	0.0586443	-0.00128494	0.013866	1	0.806189
43232	TMEM132A	0.104627	3.00191e-06	0.004904	0.115344	-0.00239284	4.72841e-10	0.0404279	8.86555e-11	-0.000778082	1.17046e-58	-0.000812255	3.20818e-13	8.68742e-05	0.680901	0.000610827	0.0322435	-0.000658893	0.108159	-0.000431054	0.469301	0.000930517	0.101409	0.000174236	0.781294	9.04912e-05	0.897597	0.000727409	0.285601	1	0.806189
51228	PLA2G15	-0.181611	2.10373e-77	0.00213889	0.115371	0.00373629	2.03119e-110	-0.0266382	1.19126e-22	-0.000374575	1.45036e-67	-6.38882e-05	0.198438	0.000672788	8.65081e-13	0.000450616	0.000379743	0.000906463	4.56916e-07	0.000156208	0.56195	0.0013779	4.83031e-08	0.000360455	0.19456	-0.000552561	0.0724819	-0.000469811	0.119243	1	0.806189
43434	JAM3	-0.154409	8.56888e-18	0.00393253	0.115539	0.00418175	7.40793e-42	-0.0210472	2.54295e-05	0.000167154	1.40653e-05	-0.000222835	0.0120773	0.000821408	1.17942e-06	0.00127762	2.48415e-08	-0.00105258	0.00136262	-0.000178036	0.711027	0.00145022	0.00145592	-0.000639949	0.203116	0.000461596	0.413418	0.000936572	0.0857882	1	0.806189
44329	DDHD2	-0.0102322	0.667384	0.00520596	0.115733	0.00123383	0.00251915	-0.0904716	2.14068e-42	9.92771e-05	0.0519658	-0.000401296	0.00065185	0.00126408	1.68004e-08	7.39346e-05	0.807068	-0.00238618	4.67472e-08	0.000683207	0.280913	0.000553724	0.359605	0.000120245	0.856894	0.00075869	0.308586	-3.77359e-05	0.958466	1	0.806189
50836	VMO1	-0.846012	1.17325e-264	-0.00530294	0.115795	0.0142561	1.06429e-255	-0.0373745	3.17218e-08	-0.000289646	6.16776e-08	-0.00140288	3.96945e-30	0.00275232	4.31368e-32	-0.00240983	1.79019e-14	-0.00283483	2.22102e-10	-0.00135858	0.0457981	-0.000582599	0.351899	-0.000739868	0.285335	-0.00321677	2.64632e-05	0.000679362	0.364804	1	0.806189
44201	VSIG2	-1.13958	0	-0.00466167	0.115958	0.0212488	0	0.0386756	7.36371e-11	0.000546768	6.30789e-33	-0.000100768	0.339823	0.00151394	4.66199e-14	-0.000802042	0.00313378	0.00289522	1.40235e-13	-0.000659881	0.245441	0.00137389	0.0113565	-0.000303248	0.612878	7.50461e-05	0.910645	0.000674323	0.299281	1	0.806189
44329	MRPL58	0.188197	1.68469e-13	0.0055724	0.116243	-0.000547141	0.211343	-0.0233595	0.00100097	-9.47743e-05	0.0834779	-0.000142875	0.257461	0.00107631	7.39203e-06	0.000900314	0.00553321	-0.000143974	0.758402	0.000629425	0.354046	0.000633574	0.328112	-0.000256779	0.719401	0.000490761	0.538916	0.000972312	0.210617	1	0.806189
49867	STX16	0.134736	8.42088e-11	-0.00454344	0.116379	-0.000786211	0.0270868	-0.00912331	0.115197	0.000132549	0.00386153	-0.000419175	7.07196e-05	0.000496349	0.0130403	0.000571582	0.0335345	-0.00168286	1.14017e-05	-0.000362937	0.52342	-6.45475e-06	0.990406	-0.000753229	0.202726	0.000116092	0.859686	-3.43971e-05	0.957215	1	0.806189
50831	CD200R1	0.114817	3.07391e-20	0.0027253	0.116579	-0.00191753	2.8329e-19	0.037052	1.89822e-26	0.000431133	1.01911e-54	-0.000815798	7.51631e-38	0.000393699	0.00104467	0.000449925	0.00563467	0.000371836	0.106236	-0.000689582	0.0437639	0.000208162	0.519314	0.00140234	7.77291e-05	0.000112701	0.774603	-2.50106e-05	0.948334	1	0.806189
44300	IMPACT	-0.14445	8.72472e-13	0.00439529	0.117862	0.00345975	1.87471e-23	-0.091731	1.04932e-59	0.000178139	4.02005e-05	-0.000589481	3.62225e-09	0.00117001	7.4914e-10	0.000473769	0.0648971	-0.0010122	0.00627243	0.00109857	0.041024	0.00054749	0.285318	0.00110468	0.0509829	-0.000616525	0.329838	0.00113598	0.0645231	1	0.806189
42820	EVI2B	-0.0287637	0.0413171	-0.00306406	0.118074	0.00100178	3.44037e-05	0.0098006	0.0124744	-6.06358e-06	0.840329	2.67436e-05	0.699058	7.89212e-05	0.549151	-3.98818e-05	0.823581	-1.95916e-05	0.939576	9.83924e-05	0.791361	-3.31367e-05	0.926252	-5.31129e-05	0.892863	-0.00018962	0.66734	0.000366822	0.394034	1	0.806189
43120	PRR4	0.195856	3.059e-15	0.00539562	0.118154	-0.00203287	1.81196e-06	0.00123201	0.858422	0.00214508	0	0.00105377	7.8011e-18	-9.59523e-05	0.680697	0.00361672	3.5024e-30	0.00360117	2.2521e-15	-0.00207002	0.00177626	0.000685163	0.276262	-0.000725904	0.295553	0.00045202	0.562664	-0.000176016	0.815264	1	0.806189
49867	GCG	-0.574229	2.81946e-36	-0.00993221	0.118527	0.0139346	8.82255e-71	-0.30435	1.60925e-125	-0.000866558	8.90001e-18	-0.000677314	0.00349772	0.00234444	9.69549e-08	0.00141358	0.0168171	-0.00139445	0.0981371	-0.0021468	0.086082	-0.0016199	0.169964	-0.00328737	0.0114641	0.00292022	0.0431572	0.00142602	0.311789	1	0.806189
43195	CCDC28A	-0.00366039	0.727036	0.00227328	0.118794	-0.000155267	0.387987	0.00273717	0.347813	-4.15593e-05	0.0645624	-6.34303e-06	0.902625	0.000113095	0.251775	8.61394e-05	0.518193	-0.000150365	0.433639	0.000228679	0.409015	-0.000112622	0.672253	0.000731994	0.0125095	-0.000263508	0.421027	4.46364e-05	0.88888	1	0.806189
51706	TGFBR3	-0.316457	6.02922e-171	-0.00245978	0.1189	0.00545257	1.51761e-172	-0.00172275	0.585315	-0.000286917	2.50666e-30	5.00056e-05	0.386112	0.000894547	2.88206e-16	-0.000215695	0.144152	-0.00121186	6.44274e-09	-3.68912e-05	0.905947	-0.000437573	0.136318	-0.00104517	0.00121748	-0.000180784	0.613033	0.00028169	0.421748	1	0.806189
49871	TBC1D17	0.0443181	0.00639448	0.00353234	0.118901	0.00113978	4.33952e-05	-0.0965282	4.79518e-100	0.000677399	3.21726e-79	-0.000448944	5.17964e-08	0.00112564	6.29485e-13	0.000239672	0.255668	0.000383798	0.200849	0.000960961	0.0305575	0.000939835	0.0257706	0.000856707	0.0643145	-0.00206145	6.09312e-05	0.000833373	0.0983246	1	0.806189
44220	ZFYVE19	0.0365278	0.25456	0.00695111	0.118944	7.16625e-06	0.989604	-0.0456173	3.18332e-07	-0.000326826	2.01588e-06	-0.000545641	0.000611038	0.00110541	0.000252886	0.000903548	0.0264383	-0.00229177	9.66956e-05	0.000271177	0.751146	0.00188465	0.0205628	-0.000458207	0.610804	0.00109852	0.274466	0.000317643	0.744651	1	0.806189
51631	CCL11	-0.787447	0	0.00297145	0.119264	0.0148122	0	-0.106032	1.46269e-168	-0.000233896	1.31213e-14	-0.000616343	8.34638e-19	0.00154376	1.29409e-31	0.000415924	0.019409	0.00223444	8.54836e-19	0.000869689	0.0211144	0.000214873	0.5436	0.000972974	0.0124756	0.000191182	0.658273	-0.000111529	0.791956	1	0.806189
44300	CAPS	-0.82326	1.22323e-133	-0.00722675	0.119395	0.0177438	5.63526e-209	0.0555207	2.20778e-09	-0.000763749	1.61355e-26	0.000369464	0.0250711	-0.000169089	0.589957	0.00137496	0.00117597	-0.00114532	0.0610439	-0.000830155	0.349683	-0.000733816	0.385742	-0.000264551	0.777113	-0.00129969	0.213437	0.000433239	0.669375	1	0.806189
51122	MATN2	-0.35038	3.84314e-236	0.00230531	0.119504	0.00492254	9.39484e-160	0.134638	0	-0.000156592	2.98163e-11	0.000452359	6.33315e-17	0.000178861	0.0807127	0.000366298	0.00815069	-0.000498291	0.0110751	0.000180108	0.539892	0.000733598	0.00798554	0.0011523	0.000150594	-0.000936122	0.00533157	0.000512772	0.119549	1	0.806189
51228	FGFR2	-0.32297	0	-0.00175596	0.119895	0.00703388	0	-0.118321	0	-0.000100926	1.7238e-08	-2.58287e-05	0.531621	0.000429883	3.85129e-08	0.000409206	0.000103278	0.000497287	0.000870825	-0.000352572	0.115282	0.000820345	9.24912e-05	-0.000467407	0.0429905	-1.84481e-05	0.942484	2.64821e-05	0.915852	1	0.806189
43602	SERPINH1	0.0190907	0.679662	0.00999401	0.12002	-0.00129641	0.10219	0.127764	3.18525e-23	9.10349e-05	0.357809	-0.000747892	0.00109733	0.00136923	0.00170553	-0.000137008	0.816191	-0.0050824	2.02772e-09	0.00151909	0.217212	0.000792655	0.500651	-0.00101181	0.435628	0.00492392	0.000673223	0.00221329	0.117903	1	0.806189
44300	TXNDC9	0.135935	5.81799e-13	0.00407733	0.120302	-0.00103962	0.00131411	0.014307	0.00641462	-1.78635e-05	0.659212	-0.000425696	5.03064e-06	0.00117462	3.65587e-11	0.000561867	0.0190593	-0.00110759	0.0013614	0.000423495	0.398934	8.67227e-05	0.85618	0.000108066	0.837999	0.000566394	0.337731	0.000578079	0.313751	1	0.806189
43434	UBXN1	0.013073	0.599139	0.00537102	0.120526	0.00182704	1.85398e-05	-0.126458	2.40414e-74	0.000111734	0.0359931	-0.000536965	1.25261e-05	0.00124918	9.42787e-08	0.000578865	0.0680637	-0.00212307	3.08055e-06	0.00101128	0.128511	0.000758736	0.228956	0.000939644	0.177074	0.00064442	0.409509	0.000138401	0.854496	1	0.806189
44329	SPACA5_SPACA5B	-0.10231	1.22776e-22	0.00225222	0.120792	0.00276835	9.67404e-54	-0.0917097	2.40315e-216	-0.000207175	2.41628e-20	-0.000123483	0.0167694	0.000266568	0.00666779	-0.000150718	0.256375	-8.81696e-05	0.645288	2.10008e-05	0.939763	-0.000318328	0.229853	-3.18839e-05	0.91319	-0.000348879	0.285757	9.89883e-05	0.755448	1	0.806189
43120	IGFL4	0.259408	1.0592e-22	-0.00571087	0.120948	-0.00173697	0.000128419	0.0315284	1.84714e-05	-0.000305553	7.0396e-08	0.000103938	0.428834	-0.000266718	0.284887	0.000132253	0.694402	0.000290603	0.54902	0.000368167	0.598963	-0.000491716	0.464259	-0.000661855	0.371805	0.000869322	0.293662	-0.000340078	0.673629	1	0.806189
43195	COL28A1	-0.360791	5.50014e-40	0.00586521	0.121219	0.00944776	1.49407e-90	-0.11867	3.26952e-55	0.000917295	1.87236e-55	0.000788635	4.73844e-09	0.000125738	0.623685	-0.000179797	0.603541	-0.00146734	0.0032612	-0.00108664	0.130875	-0.00147682	0.0326711	-0.000688501	0.365704	-0.0014627	0.0854631	-0.00173534	0.0364767	1	0.806189
51706	ST6GAL1	-0.457821	0	0.00229715	0.121295	0.00784177	0	0.0417354	7.71689e-45	0.000182422	9.63311e-15	-1.82703e-05	0.736197	0.00114812	6.1168e-29	0.000220795	0.111708	-0.000100851	0.607231	4.65105e-05	0.87408	0.00038577	0.162351	-2.87266e-05	0.924638	-0.000859728	0.010506	0.000429977	0.192007	1	0.806189
42820	UNC79	0.192848	1.21442e-21	0.00434491	0.121357	-0.0021837	2.78388e-10	-0.0164254	0.00342495	-5.40168e-05	0.209656	-0.000297095	0.00268463	0.000327451	0.0823449	0.000100162	0.695528	-0.00243194	4.85109e-11	0.000502973	0.344537	0.000619453	0.226487	-0.000852258	0.130899	-0.000857514	0.174281	-0.000534147	0.385664	1	0.806189
42978	CSPG5	0.0884127	4.5196e-07	-0.0037766	0.121427	-0.0012469	3.32464e-05	0.0566645	3.57379e-31	-0.000206742	3.82286e-08	-5.74465e-05	0.508126	0.000198509	0.229548	0.000152954	0.491666	0.00055138	0.0864377	-0.000779629	0.091579	8.91007e-05	0.841683	-0.000648496	0.186611	-0.000755486	0.167648	-0.000737589	0.16819	1	0.806189
43195	RPGR	0.0394005	0.00713092	0.00315155	0.121473	-0.000482182	0.05488	0.0152534	0.000179392	2.16706e-05	0.490077	-2.07881e-06	0.977093	0.000252762	0.0666169	-0.00020281	0.275968	8.22602e-05	0.759034	0.00101571	0.00863822	-0.000583413	0.116552	-8.57772e-05	0.83399	7.64149e-05	0.867291	0.000599831	0.17876	1	0.806189
42978	SMS	0.276553	1.12943e-33	0.0049192	0.121852	-0.00279369	1.01184e-12	0.00300417	0.636587	-0.000117603	0.0164389	-0.00014705	0.193945	0.00026877	0.212209	5.43613e-05	0.851331	-0.00193024	4.18124e-06	0.00017624	0.769927	-0.000276306	0.634791	-0.000996283	0.119733	0.000307009	0.667204	0.000705891	0.311851	1	0.806189
49871	NOS1	-0.67749	2.11179e-266	-0.00416323	0.12191	0.0158865	0	-0.351586	0	0.000454897	1.50636e-26	0.000598044	1.03269e-09	0.00109895	3.39163e-09	0.000322772	0.19763	-0.00114117	0.00137062	-2.886e-05	0.956404	-0.00226727	5.99631e-06	-0.000276952	0.614728	-5.22464e-05	0.931846	0.000577837	0.334731	1	0.806189
50836	AARSD1	-0.3118	2.46379e-53	0.00436558	0.121991	0.00752631	1.32632e-103	-0.180015	3.69153e-220	0.000491056	6.04216e-28	-0.000119619	0.245122	0.000612236	0.00171816	8.98349e-05	0.7328	-0.000168219	0.652825	0.000841645	0.139423	-1.72536e-05	0.97373	0.0012686	0.0286582	-0.0027731	1.51256e-05	-3.69206e-05	0.953088	1	0.806189
50116	RGS8	0.225794	4.14188e-22	0.00502586	0.122116	-0.001304	0.00112643	-0.00585186	0.368969	0.000229415	9.38378e-06	-1.34351e-05	0.91003	2.02262e-06	0.992834	-0.000917985	0.00245918	-0.00157088	0.000264238	-0.000295162	0.643406	0.000617834	0.306372	-2.09859e-05	0.974824	0.000353059	0.632497	0.000332349	0.645037	1	0.806189
49871	GGA1	0.546381	3.02243e-109	0.00528563	0.122334	-0.00770567	1.34053e-74	0.055288	7.14533e-16	-0.000603989	8.1195e-29	0.000215525	0.0834391	-0.000231041	0.328097	-0.000306778	0.335354	-0.00196476	1.45455e-05	-0.000742728	0.268351	0.000628814	0.323254	0.00109931	0.115985	-0.00218226	0.00494908	0.000890564	0.242137	1	0.806189
51228	ITGB5	-0.56319	0	0.00290181	0.122539	0.00972783	0	0.0680908	4.76253e-73	-9.5541e-05	0.00134158	-0.000189055	0.00594247	0.000565683	1.38103e-05	0.00127856	3.14926e-13	-0.00102914	3.47899e-05	-2.05035e-05	0.956115	0.000413516	0.236356	-0.000675786	0.0787301	0.000662617	0.11947	2.01036e-05	0.961562	1	0.806189
43195	MYL6B	0.27531	5.48363e-17	0.00703513	0.123406	-0.000508673	0.366729	0.00280205	0.759044	-0.000167703	0.0172991	0.000715784	1.0541e-05	-0.000605499	0.0502024	0.000822465	0.0489637	-0.0014578	0.0154091	-0.000883928	0.308429	-0.00254713	0.00226168	-0.00179186	0.051037	-0.00100564	0.327063	-0.00239303	0.0168216	1	0.806189
50116	IL4	-0.150748	3.0151e-06	-0.00691983	0.123692	0.000197322	0.721497	-0.00254409	0.777569	-0.000339668	2.08843e-06	-8.87314e-05	0.589359	0.000273459	0.37979	-0.000195917	0.64017	0.000157117	0.791849	0.00160971	0.0678542	-1.01506e-05	0.990303	-0.000579233	0.528697	-0.00096391	0.345029	-0.000456087	0.647511	1	0.806189
42948	ELOB	-0.0186168	0.184862	0.00301125	0.123746	0.00106225	1.03722e-05	-0.0125556	0.00131954	0.000124008	3.59838e-05	4.9949e-05	0.470427	0.000292341	0.0265155	0.000562401	0.00160956	-0.000958509	0.000202198	8.43318e-05	0.819755	8.58857e-05	0.809597	-0.000391364	0.319278	-0.000387774	0.377129	0.0005566	0.19369	1	0.806189
51505	ITGAV	-0.361995	0	0.00128985	0.123756	0.00568503	0	0.0538572	5.45603e-224	-4.02374e-05	0.00250252	0.000122699	5.64162e-05	-0.000342545	3.05322e-09	0.000253387	0.00118955	-0.00102611	2.18234e-20	0.000174415	0.292046	-0.000269455	0.0833942	-0.000170476	0.319562	-0.000483506	0.0109284	-0.000160779	0.3867	1	0.806189
43232	FSHB	-2.69693	0	-0.00493908	0.123838	0.0417376	0	1.48343	0	-8.09327e-05	0.102619	-0.000523672	5.15096e-06	0.00046083	0.0342871	-0.000140496	0.632689	0.000384771	0.362641	0.000633919	0.301786	-0.000655099	0.263125	0.00121083	0.0611894	-0.000226995	0.754082	0.00102869	0.142835	1	0.806189
44220	SSNA1	-0.0644503	0.000457344	0.00392649	0.124649	0.00261964	1.03103e-16	-0.0510594	2.02035e-23	-0.000113376	0.00405137	-0.000470738	2.55488e-07	0.00120442	3.65622e-12	0.000323915	0.165332	-0.00046496	0.167853	0.000103947	0.832158	0.000999452	0.0322557	0.00101222	0.0499899	0.000243636	0.67261	-0.000354413	0.526361	1	0.809603
44329	IGBP1	0.106471	1.21624e-06	0.00467893	0.124917	-0.000241396	0.521148	-0.120989	4.04958e-87	0.000158751	0.000743644	-0.00061703	1.27904e-08	0.00120002	6.11442e-09	0.000502562	0.0715838	-0.000730524	0.0694149	0.00177016	0.00242733	0.00084785	0.127872	0.0010191	0.0971473	-0.000265348	0.699105	0.000346365	0.603869	1	0.809603
43434	CELSR2	0.166837	4.83478e-59	-0.00218865	0.125916	-0.00197498	4.59532e-29	-0.096533	1.70191e-246	-2.32978e-05	0.290179	-6.76737e-05	0.182907	0.000789376	3.43498e-16	0.000374318	0.00431753	0.000189477	0.313783	-0.000152761	0.578605	-0.000127066	0.625993	-0.000654302	0.022989	-0.000527235	0.102622	0.000434587	0.163638	1	0.814277
51518	THY1	-0.413156	0	-0.00224099	0.127015	0.00638154	4.88311e-270	0.110058	1.89533e-302	0.000463964	5.98117e-88	-9.15726e-05	0.0874498	0.00101677	1.52128e-23	0.000338504	0.0136201	0.000211824	0.275973	0.000613249	0.0350699	0.00153573	1.956e-08	-9.26813e-05	0.757967	-0.000318031	0.339309	-3.32459e-05	0.919014	1	0.817413
49871	IFNL1	-0.095185	3.4802e-09	0.00342645	0.127028	0.00241485	2.41597e-18	-0.0586795	7.36339e-39	-0.000287851	5.96687e-16	-0.000303335	0.000205976	0.0004652	0.00270152	-0.00023958	0.251704	0.00111262	0.000183678	0.000804908	0.0676291	0.000450402	0.281069	0.00161482	0.000435611	0.000148238	0.771166	-0.000589167	0.238439	1	0.817413
44414	CSPG4	-0.823703	0	0.00252795	0.12724	0.0139429	0	0.0707903	1.29558e-100	0.000517346	5.87598e-91	-0.000150734	0.0106576	-0.000291983	0.00930149	-0.000572884	0.000153909	-0.0016702	2.24707e-14	0.000111773	0.724739	-0.000234132	0.438316	-0.000222564	0.505077	0.000254154	0.495695	0.00075935	0.0362224	1	0.817413
50140	ZBTB17	-0.20587	1.90296e-41	0.00323681	0.127628	0.00535269	1.09398e-92	-0.0942018	6.09514e-108	7.49535e-05	0.0265324	-0.000149245	0.0544091	0.000889569	1.4734e-09	8.4685e-05	0.669724	0.000236034	0.401523	0.000174483	0.675366	0.00100423	0.0110478	0.00144846	0.000847327	-0.00114124	0.0177453	0.000115689	0.80645	1	0.818108
51076	DCTPP1	-0.596305	0	0.00240362	0.128275	0.0103426	0	0.0147513	3.17852e-06	2.54245e-06	0.91958	2.46698e-05	0.669455	0.000541809	7.54005e-07	-0.00042097	0.0045598	-0.000870674	3.18237e-05	0.000470235	0.13317	-0.000584063	0.0477733	0.000334187	0.302467	0.000224341	0.531183	0.000495338	0.159901	1	0.820456
51228	DCXR	-0.00662523	0.736225	0.00416871	0.128756	0.00505372	1.1745e-50	-0.416809	0	0.00033728	9.17432e-15	-0.000472207	2.54367e-06	0.000536492	0.00475714	0.000455258	0.0755135	4.16958e-05	0.908562	0.00134113	0.0137153	0.000443079	0.384953	0.00083439	0.137175	-0.000118739	0.848484	-0.000830202	0.172952	1	0.820808
44329	ARFIP1	0.0346659	0.157581	0.00517722	0.128907	8.2246e-05	0.84501	0.0141575	0.0379936	-6.65425e-05	0.206063	-0.00059096	1.09986e-06	0.00135041	4.8949e-09	0.000515613	0.0982942	-0.00274464	1.06326e-09	0.00129524	0.0472228	-0.000779448	0.210649	-7.45029e-05	0.913633	0.000616458	0.421931	0.000659278	0.377128	1	0.820808
51706	BLMH	0.00333936	0.770915	0.00242511	0.12941	0.000998027	3.89317e-07	-0.101803	7.79498e-220	9.86258e-05	0.000103429	0.000105497	0.0713144	0.000136807	0.21719	0.000447138	0.00282481	-0.000771265	0.000268132	0.00105793	0.000832358	0.000625761	0.0356251	-0.000360069	0.271668	1.30592e-05	0.971255	0.000668116	0.0601837	1	0.820808
50836	TAFA5	-0.603854	0	-0.00273109	0.129654	0.0107857	0	0.0178895	7.25944e-07	-0.000230731	7.15443e-16	-0.000126062	0.0550255	0.00193729	2.47361e-54	0.000791838	2.43768e-06	6.00336e-05	0.801449	-0.000521409	0.151507	8.77989e-06	0.979058	-0.0006208	0.0934753	-0.000439105	0.283134	0.00120039	0.00273557	1	0.820808
44220	CETN3	0.233219	3.03336e-17	0.00581472	0.129807	-0.00335107	1.49688e-12	-0.0170574	0.0263891	-0.000781592	1.0434e-39	-0.000575201	2.72525e-05	0.00116092	8.07011e-06	0.00101472	0.00378935	-0.0022659	7.57483e-06	0.000336144	0.647987	0.0012941	0.0647522	0.000377706	0.626092	7.35565e-05	0.93227	-0.000292792	0.727328	1	0.820808
50342	ANGPTL1	-0.286381	1.7084e-166	0.0021887	0.130083	0.00409796	9.07277e-117	0.114796	0	-0.000235648	1.38041e-24	0.000570741	5.59099e-27	-0.000231431	0.0211862	-2.82999e-05	0.83483	-0.00106443	2.6947e-08	-5.71004e-05	0.841258	-0.000195287	0.469409	8.83921e-07	0.997618	-0.000997073	0.00232135	-0.00109967	0.000645694	1	0.820808
43602	EVPL	0.00789774	0.503649	0.00248364	0.130392	0.000316343	0.118464	0.00200305	0.542122	-6.98648e-05	0.00573341	-0.00014364	0.0141098	0.000116077	0.297759	-0.000275617	0.0671599	9.9155e-05	0.646939	0.000407692	0.194803	-0.000557399	0.0637402	0.000503917	0.128511	0.000454436	0.219215	0.000164766	0.648599	1	0.820808
44414	TNFSF8	-0.242649	1.98033e-79	-0.00269859	0.130577	0.00406751	6.07124e-76	0.0427728	5.17994e-33	-0.000206771	5.41335e-14	-0.000154644	0.0149746	6.17338e-05	0.609594	0.000318865	0.0504288	0.0010589	6.9108e-06	0.000556677	0.103402	0.000820194	0.0116954	9.52197e-05	0.791157	0.000150593	0.70776	-0.000147618	0.705352	1	0.820808
44220	SERPINI2	0.164761	2.40169e-16	0.00421729	0.131037	-0.00222647	1.04288e-10	0.0814394	5.57413e-48	0.0010139	1.03165e-121	-0.000477952	1.66018e-06	0.00112826	2.50448e-09	0.000736736	0.00386482	0.00226581	7.65079e-10	-8.31997e-05	0.876577	-0.00312708	8.64155e-10	0.00157998	0.00509344	-0.00115246	0.0672409	0.00227395	0.000198005	1	0.821398
44201	ACRBP	0.022274	0.105605	0.00288671	0.131233	0.000592196	0.0121376	-0.0434588	8.16948e-30	-0.000400673	5.49341e-42	-0.000342615	4.87582e-07	0.00066308	3.02638e-07	0.000531971	0.00238065	-0.00118491	2.67886e-06	9.39249e-06	0.97955	0.000379779	0.277917	-0.000577103	0.13546	9.43593e-05	0.826822	0.000195848	0.640205	1	0.821398
43434	EPHA4	-0.0627133	7.18873e-10	-0.00213444	0.131545	0.000866194	6.99633e-07	0.0282594	1.92174e-23	-1.92367e-05	0.377535	-0.000189934	0.000158946	0.00104818	7.35536e-28	3.24789e-05	0.802413	0.00113704	1.01826e-09	0.000594214	0.0290399	0.000702173	0.00650488	3.75309e-05	0.895161	0.000154839	0.628125	-1.11448e-05	0.971208	1	0.821592
50999	SLC39A5	-0.558041	2.13542e-181	-0.00406088	0.132375	0.0119714	2.5128e-281	-0.247604	0	-0.00178239	0	-0.000307678	0.001785	0.000782529	2.74739e-05	0.00106779	2.39324e-05	0.000798393	0.0256101	0.000393708	0.459275	0.00039261	0.434086	-0.00136252	0.0135259	-0.000953836	0.118956	-0.000534214	0.373229	1	0.824699
42820	REST	0.0358896	0.00440612	0.00263591	0.132606	-0.000416618	0.0539812	0.00627743	0.0734514	-4.96553e-05	0.0649764	-3.24339e-05	0.599982	9.86874e-05	0.402111	-0.000192166	0.22954	0.000235134	0.308861	0.000571682	0.0855721	0.000294353	0.357735	0.000200543	0.569483	0.000203835	0.605303	-0.000115628	0.763784	1	0.824699
44066	EIF2AK2	0.19444	7.24552e-07	0.00817134	0.134178	-0.00196646	0.00348762	-0.0543275	6.52557e-07	0.000169435	0.0442657	-0.00119298	9.08638e-10	0.00164121	9.04319e-06	0.00107298	0.0311426	-0.00310965	1.53652e-05	0.000511013	0.624836	0.0016382	0.0996603	-0.000977197	0.374716	-0.000293626	0.811206	-0.000241213	0.839794	1	0.830598
42820	CYTH3	0.289707	1.34451e-28	0.00543519	0.134217	-0.00354513	2.44094e-15	0.0330714	5.26254e-06	-0.000544681	1.49484e-22	0.000409092	0.00140101	-0.000456588	0.0611866	-4.25895e-05	0.897664	-0.00101243	0.0343362	-0.000317023	0.645185	-0.000954064	0.149962	0.000869799	0.233458	-0.00136187	0.0954051	-0.000472952	0.552743	1	0.830598
44329	RGS10	0.166673	4.13772e-15	0.0044149	0.134512	-0.00211604	6.17563e-09	0.00846262	0.151716	-0.000163661	0.000325463	-6.36538e-05	0.544046	0.000824109	3.67431e-05	0.000369688	0.170703	-0.00123186	0.00155312	0.0006098	0.280257	0.000145792	0.786689	-1.32468e-06	0.998222	0.000458235	0.490231	0.000704571	0.275317	1	0.830598
51082	ARSA	-0.183275	8.33182e-30	0.00336462	0.134779	0.00527977	9.44059e-81	-0.102423	1.03804e-113	0.00166787	0	0.000252991	0.00201201	-0.000402388	0.00958435	0.00120628	8.77823e-09	-0.000337406	0.257189	0.00174515	8.97761e-05	0.00163635	9.3886e-05	-0.00128981	0.00518902	-0.00131579	0.0100219	0.00114143	0.0225778	1	0.830598
44329	GPR158	-0.174193	1.56143e-42	-0.00264292	0.1353	0.0028011	1.32776e-37	0.0953877	1.53462e-158	-0.000433126	1.75939e-56	-0.00027846	9.68207e-06	8.33183e-05	0.486641	0.000135457	0.402692	0.000747237	0.00137349	-0.000254627	0.45228	-0.000873838	0.0068533	-0.000413202	0.246466	-0.0014965	0.000172642	-0.00119548	0.00203131	1	0.830598
44414	GOT1	-0.0723498	1.33093e-06	0.00310454	0.135759	0.00348683	5.91413e-42	-0.179487	0	0.000195192	1.12425e-09	-0.000187229	0.0115207	9.94039e-05	0.480653	0.000395834	0.0372547	0.000293247	0.285454	0.00129791	0.00112738	0.000316209	0.404441	0.000761404	0.0693484	0.00033612	0.472982	0.000298321	0.512219	1	0.830598
44329	GNAS	0.991938	1.84465e-218	0.0064819	0.135831	-0.0123226	3.59554e-116	-0.0963848	1.6523e-28	0.000267519	6.66461e-05	-0.000482871	0.00178394	0.0018235	5.71376e-10	-0.000127943	0.747574	-0.00077796	0.174876	0.00301678	0.000288105	0.00176884	0.0258364	-9.81228e-06	0.991059	0.00218299	0.0256751	0.000711838	0.454362	1	0.830598
51364	OSMR	-0.352673	0	0.00149509	0.136197	0.00532579	0	0.0944315	0	-8.49928e-05	9.81175e-08	0.000163579	8.40041e-06	8.15921e-05	0.24056	0.000424854	6.25072e-06	8.93419e-05	0.501027	0.000841714	2.15839e-05	0.00116588	4.63133e-10	0.000394179	0.0548279	-0.00049954	0.0278814	0.000177513	0.426371	1	0.830598
51291	GAL	0.928493	0	-0.00487655	0.13642	-0.0126129	2.901e-213	-0.347209	0	-0.000929932	3.54247e-71	-0.000305279	0.01063	-0.000449594	0.0469678	-0.000831224	0.0066724	0.00261545	1.63365e-09	0.002187	0.000772331	0.000109	0.858576	0.00159349	0.0178271	-0.00108578	0.143793	0.00299161	4.06085e-05	1	0.830598
43602	ARHGAP30	0.131134	8.17707e-21	0.00289537	0.137103	-0.000926239	0.000116274	-0.00550634	0.157691	-0.000177431	3.32946e-09	0.000193658	0.00527122	-0.000178975	0.175865	-1.64604e-05	0.926557	-0.000604706	0.0185237	0.000462245	0.215209	-0.000442281	0.214858	-0.000352996	0.369328	-0.000704082	0.108513	0.000201391	0.638624	1	0.830598
51076	LEPR	-0.318414	7.35887e-169	0.00237246	0.137122	0.00496333	5.30716e-140	0.1006	2.87633e-215	-0.000382045	6.60713e-51	6.85109e-05	0.240403	-0.000524241	2.13812e-06	-0.000374899	0.0123649	-0.000533233	0.0116342	-0.000495294	0.11727	-0.000459216	0.123288	0.000351036	0.283455	2.77228e-05	0.938919	-0.000796711	0.0251938	1	0.830598
50836	CDKN1A	-0.0495771	0.194246	-0.0079098	0.137205	0.00249622	0.000138408	-0.187328	6.72139e-69	1.74075e-06	0.98355	-0.000862307	8.83268e-06	0.00415863	1.48447e-29	-0.000618724	0.212307	-0.00661152	6.97217e-21	0.00124217	0.247257	0.000657237	0.505802	0.000231089	0.832547	0.00450071	0.000195269	-0.000415928	0.725179	1	0.830598
44414	PDIA4	0.0280943	0.196742	0.00449475	0.1376	0.000400744	0.283091	0.0107494	0.0758977	-0.000108485	0.0199347	-0.000452412	2.70871e-05	0.00129999	2.30892e-10	0.000660564	0.016865	-0.002229	2.39597e-08	0.000388846	0.50236	0.000751862	0.172945	-0.000240634	0.693141	0.00137331	0.0438335	0.000843768	0.202542	1	0.830598
51505	MOG	-0.72245	0	-0.00249245	0.137806	0.0121373	0	0.058725	3.90394e-68	-0.00039349	3.81416e-49	-0.000248887	4.58195e-05	-8.92344e-05	0.440866	0.000160482	0.305671	0.00123123	3.00504e-08	-0.00112306	0.000712009	-0.000646999	0.0380619	-0.000264617	0.440774	-0.000939523	0.0136082	-0.000945196	0.0111171	1	0.830598
42593	GRSF1	0.238056	2.058e-16	0.00597012	0.138292	-0.00210785	2.19764e-05	-0.0627892	6.67983e-15	2.78115e-05	0.652918	-0.000401153	0.00474318	0.00172758	1.72734e-10	0.000581898	0.113854	-0.00158661	0.00283078	0.00035799	0.640279	0.00129989	0.0772677	3.81119e-05	0.96248	0.000985349	0.276684	0.000420949	0.633942	1	0.830598
51518	BST2	-0.149374	2.64267e-15	0.00389411	0.139146	0.00511434	5.06858e-56	-0.0742379	6.13236e-45	0.000947353	2.26534e-113	-0.00147506	4.31694e-53	0.00107339	3.85814e-09	0.00238273	3.59788e-22	0.00506185	1.11921e-47	0.00242487	3.35638e-06	0.00143814	0.00335088	0.00334494	5.57787e-10	0.00383803	1.27173e-10	0.000506212	0.387867	1	0.830598
42948	RIPK4	0.174563	7.01725e-13	0.00500427	0.139543	-0.000183522	0.659902	0.0205999	0.00233759	-9.63716e-05	0.0636199	0.00032456	0.00675188	0.00011546	0.612771	9.05355e-05	0.769295	0.000162831	0.715354	0.00133887	0.0366686	-0.00044236	0.473496	0.000794914	0.242638	-0.000329355	0.664809	-0.00120427	0.104318	1	0.830598
50116	ARTN	0.0804508	4.09891e-07	0.00326716	0.139662	-0.000643931	0.0180878	0.00738324	0.0957244	-6.30788e-05	0.0733372	-6.07307e-05	0.452812	4.62453e-05	0.762781	-0.000259025	0.209143	0.000562606	0.0548124	2.31208e-05	0.957495	-0.000511217	0.213533	-0.000965119	0.0329176	0.000518585	0.3019	-0.000701372	0.153056	1	0.830598
43816	BRAP	-0.0655381	0.0935057	0.00802648	0.139799	-0.000103667	0.877074	-0.0231657	0.0331777	1.99265e-05	0.812098	-0.00044297	0.0224132	0.00238619	9.17106e-11	4.329e-05	0.930614	-0.00545343	2.9714e-14	0.000663625	0.524964	0.00168644	0.089466	-0.000377666	0.730794	0.000480774	0.694754	0.000151417	0.898614	1	0.830598
43904	IST1	0.0494849	0.15974	0.00722051	0.140264	-0.000558862	0.354624	-0.0542668	3.05059e-08	0.000108398	0.151238	-0.000762283	1.27338e-05	0.0022385	1.43422e-11	0.00120055	0.00723974	-0.0020346	0.00163714	0.000894779	0.339318	0.00154552	0.0837273	0.000344275	0.727265	0.000937335	0.395527	0.00144332	0.177519	1	0.830598
43434	C1QTNF5	-0.0201346	0.133073	0.00274821	0.140488	0.000582047	0.0113705	0.000218028	0.953377	0.000592509	3.90317e-94	0.00037826	1.13628e-08	0.000151817	0.228684	0.000174752	0.306772	-0.000456653	0.0625916	0.000753264	0.0356694	0.000260218	0.443938	-8.7967e-06	0.981294	-0.000641664	0.127577	0.000252628	0.534544	1	0.830598
50836	CDNF	-0.256492	4.88658e-109	-0.00236887	0.140516	0.00585936	3.26824e-191	-0.129663	0	2.8111e-05	0.27025	1.13927e-05	0.845841	0.000791606	1.09383e-12	2.94282e-05	0.844275	-0.0012672	2.66892e-09	5.96175e-05	0.854111	-0.00188787	2.49353e-10	-0.000490533	0.137254	0.000432245	0.236155	0.000725492	0.0423217	1	0.830598
43232	CRYZL1	0.115091	0.000453091	0.00672303	0.140631	-0.00156275	0.00549078	-0.0536157	4.33925e-09	-0.000211228	0.00273037	-0.000702286	1.70547e-05	0.00171652	2.93707e-08	0.000407372	0.329657	-0.00330095	3.95885e-08	0.000956528	0.273074	0.000981471	0.238274	0.000513612	0.576426	0.00094693	0.357978	0.000364456	0.714975	1	0.830598
50379	CCL18	-1.07835	0	0.00530419	0.140737	0.0212059	0	-0.14892	2.42852e-94	0.000487747	1.51663e-17	0.000385321	0.00347411	0.00221366	6.78162e-19	0.000748042	0.0267162	-0.000365937	0.4432	0.00130273	0.0716742	-0.000368829	0.583352	0.000493741	0.504488	0.000685106	0.401028	0.0018525	0.0207781	1	0.830598
43048	NDUFA5	-0.0723505	1.25121e-08	0.00260567	0.14082	0.00196604	1.94965e-19	-0.048367	1.7975e-42	-1.76729e-05	0.516718	-0.000198681	0.00165619	0.000457969	0.000134079	0.00045533	0.00486358	-0.000740794	0.00147774	-3.84232e-06	0.990881	-0.000126179	0.695777	-0.000211002	0.553306	0.000207012	0.602628	0.000623814	0.108298	1	0.830598
51122	CDON	0.219896	3.84388e-115	0.00197379	0.140943	-0.00336591	3.04244e-92	-0.0595691	1.58268e-108	7.62298e-05	0.000350501	-0.000184658	0.000163353	0.0011261	6.72572e-34	0.000442103	0.00042036	-0.000414058	0.0197253	0.000433501	0.103196	0.000728376	0.00362522	-0.000428523	0.119497	-0.000110001	0.71762	-9.26112e-05	0.756153	1	0.830598
43434	RABEP1	0.130915	3.452e-06	0.00575497	0.142325	-0.00104423	0.030889	-0.0639658	3.62554e-16	0.000571312	3.32378e-21	-0.000797751	1.04528e-08	0.00178996	1.53519e-11	0.000738731	0.0400133	-0.00256296	6.79573e-07	0.000400566	0.595415	0.00156723	0.0284065	0.000929382	0.239003	0.000844719	0.340341	-1.78895e-05	0.983321	1	0.836548
44195	GSR	-0.193307	1.569e-124	0.00165461	0.142606	0.00369802	3.66665e-154	-0.020319	2.35715e-19	0.000292664	4.51069e-63	2.45586e-05	0.541306	0.000350943	4.41891e-06	0.000249749	0.0156019	-0.000711516	1.733e-06	0.000636644	0.00321576	-0.000140256	0.496036	0.000365243	0.108142	-0.00047157	0.063318	0.000366738	0.13777	1	0.836548
50678	CCS	0.0677625	7.63719e-05	0.00349593	0.143057	0.000877386	0.00282706	-0.165968	6.2987e-261	-0.000561788	1.61522e-49	-0.000367272	2.33393e-05	0.000937777	1.23684e-08	-0.000156721	0.483071	-0.000436551	0.16696	0.00138267	0.00322532	0.000537005	0.227744	0.00048638	0.318922	-1.4761e-05	0.978259	0.000111411	0.834126	1	0.836548
42948	TSNAX	0.0733378	3.09184e-07	0.00292303	0.14315	-0.000279186	0.256069	-0.0594991	3.50301e-50	-0.000113886	0.000200377	-7.42409e-05	0.29313	0.000495081	0.000231785	0.000379802	0.0368517	-0.000856989	0.0011298	0.000837907	0.0265215	-5.39043e-05	0.882193	3.39818e-05	0.932466	-0.000704617	0.115806	-0.000649936	0.136954	1	0.836548
44480	LGALS3BP	-0.091746	5.06081e-16	0.00230305	0.143384	0.00192052	4.39705e-23	0.0454032	4.40431e-47	0.000329135	5.80306e-42	-0.000338264	1.51807e-09	0.0013396	2.88492e-36	0.000840592	5.36335e-09	0.000844766	4.62882e-05	0.000128476	0.670102	0.00100586	0.000467364	5.56651e-05	0.860922	-0.000571458	0.106757	0.000541724	0.115657	1	0.836548
43271	ACYP1	0.0641939	0.00701754	0.00483793	0.143995	0.00030283	0.458431	-0.113487	1.39211e-65	0.000572378	3.57855e-29	-0.000345784	0.00326975	0.00186012	1.01361e-16	0.000971611	0.00138984	4.23427e-05	0.922555	0.00078886	0.214961	0.000692286	0.251782	0.000950729	0.153619	-0.00138193	0.0644568	0.000579529	0.422336	1	0.83827
51082	CCN5	-0.866975	0	-0.00293542	0.1443	0.0182439	0	-0.284454	0	0.000193825	1.27147e-09	0.000682559	1.16066e-20	0.00083481	1.82366e-09	0.000270768	0.148418	-0.000702859	0.0082656	-0.000329364	0.408126	-0.000157551	0.673876	-0.000687114	0.0956779	-0.000759619	0.0962125	0.00106116	0.0176755	1	0.83827
43120	STAT2	-0.0236926	0.394288	0.00565228	0.144539	0.00151142	0.0015364	-0.0210746	0.00650017	3.55144e-05	0.551406	-0.000561018	4.92333e-05	0.00173749	3.57343e-11	0.000812976	0.0216888	-0.00284174	2.55739e-08	-0.000245175	0.7392	0.000744875	0.291936	9.11311e-05	0.906941	0.0014858	0.0879802	0.000296591	0.726958	1	0.83827
51228	DLL1	-0.43744	0	-0.00218592	0.14527	0.008773	0	-0.0814261	1.01168e-160	-0.000186935	4.02147e-15	-0.000138636	0.0115445	0.00117035	2.21031e-29	-0.000433707	0.00196207	-9.30147e-06	0.962634	-0.000379051	0.202753	0.000413953	0.137763	0.000307252	0.316913	2.27854e-05	0.946553	0.000412494	0.215679	1	0.840841
49871	NOS3	-0.276518	1.50412e-46	0.00390945	0.145757	0.00758871	6.36653e-116	-0.196887	3.4332e-289	0.00073729	5.30442e-67	-0.000326007	0.000859245	0.00134004	5.26088e-13	0.00012654	0.612971	-0.000971713	0.00634163	0.00108751	0.0391142	0.00112843	0.0240461	0.000333652	0.543661	6.63375e-05	0.9134	0.00122488	0.04058	1	0.841651
51291	DAG1	-0.14835	4.27633e-18	0.00346534	0.146109	0.00372009	8.12079e-37	-0.0855277	1.57011e-71	-4.62984e-05	0.221854	-0.000314122	0.000306237	0.00113145	6.66504e-12	0.000672871	0.00256264	-0.00101717	0.00127551	0.0008712	0.0658176	0.000750338	0.0920723	-0.000199841	0.683222	0.000661589	0.221226	0.000305575	0.564778	1	0.841651
51228	TGFBR2	-0.763587	0	-0.00242884	0.146422	0.0141315	0	-0.0100738	0.00261389	-0.000319527	2.10807e-33	0.000179326	0.00336891	0.00157816	3.26266e-42	0.000720417	3.93606e-06	0.000287117	0.19437	-5.22876e-05	0.874707	0.000591956	0.056826	-0.000302203	0.377022	1.40623e-05	0.970383	0.00111679	0.00262915	1	0.841651
44201	SMAD2	0.133835	6.56848e-08	0.00499683	0.146562	-0.00032204	0.448469	-0.0847923	9.59363e-35	-6.72249e-05	0.205096	-0.000554466	6.04743e-06	0.00140761	1.52505e-09	0.000102577	0.744757	-0.00348821	1.62264e-14	0.000750208	0.255235	0.000900915	0.152628	0.000269146	0.698817	0.00121106	0.118673	0.000823741	0.274621	1	0.841651
43232	SNED1	-0.324496	1.07734e-169	0.00234234	0.147633	0.00567375	3.06983e-176	0.0293762	1.19022e-19	7.92821e-05	0.00151228	0.000165319	0.00429803	0.000499439	5.34029e-06	7.8604e-05	0.595749	0.000148562	0.485576	0.000561056	0.0697984	-0.000361439	0.220594	-0.000293811	0.367423	-0.000280442	0.442573	-0.00035049	0.321912	1	0.846143
50597	SERPINA9	-0.854405	6.24147e-238	0.00519895	0.148426	0.0148315	1.17743e-243	0.0907753	2.34749e-36	0.000289523	3.90974e-07	-0.00254132	4.1359e-83	-6.01929e-05	0.808996	0.000657237	0.0499226	0.00200983	2.45867e-05	0.00168607	0.0198882	-0.000562217	0.399943	0.00262796	0.00037079	0.000626476	0.442867	0.000303719	0.704704	1	0.848752
42978	BRD2	0.00199156	0.87084	0.0024584	0.149284	0.000220797	0.293166	0.00352098	0.301671	-7.62235e-05	0.00372967	0.000138367	0.0226209	0.000139524	0.227081	-2.05699e-05	0.894766	-0.000620349	0.00579863	2.19406e-05	0.945855	-0.000261378	0.401982	-0.000143496	0.675954	8.31629e-05	0.828013	-4.45514e-05	0.905231	1	0.848752
44480	SERPINA7	-0.0586783	1.47417e-18	-0.00133817	0.149525	0.00040236	0.000438969	0.0676636	1.31119e-286	0.00014712	7.95737e-25	-5.41266e-05	0.10117	0.000644335	1.1142e-24	-0.00030929	0.000272717	4.7531e-05	0.69761	0.000501309	0.00483964	0.000885844	1.76431e-07	3.11983e-05	0.867808	-0.000151788	0.467712	0.000407562	0.0448235	1	0.848752
43434	PHYKPL	-0.173812	6.26781e-31	0.00300674	0.150073	0.00367475	4.7459e-46	-0.063512	4.76696e-52	0.000548408	6.24779e-65	-0.000204152	0.00595249	0.000522426	0.000218387	0.000104485	0.58549	-0.00103615	0.000162827	0.000310946	0.43896	0.000566031	0.13722	-0.000322074	0.443578	0.00105763	0.0249959	-0.000577288	0.205273	1	0.848752
49638	PTS	-0.334679	4.60318e-59	0.00413633	0.150187	0.00861755	2.68134e-130	-0.156212	5.61733e-161	0.000438157	6.66495e-22	-0.00078608	6.51812e-14	0.000957194	1.50709e-06	0.000117053	0.662378	0.000707739	0.0631856	0.00204589	0.000279718	0.000963925	0.0718189	0.00101354	0.084684	-0.000473999	0.467668	0.000652329	0.308423	1	0.848752
43434	VTI1A	-0.00732935	0.728218	0.0042141	0.150892	0.00192296	1.07455e-07	-0.0466272	1.96744e-15	0.00031755	2.13048e-12	-0.000610399	4.77797e-09	0.00130755	4.48404e-11	0.000762812	0.00458156	-0.0018173	2.49084e-06	0.00041656	0.46034	0.00109808	0.0400711	0.000175142	0.766716	9.20839e-05	0.889476	-1.25056e-05	0.984411	1	0.848752
43434	ST13	0.116898	9.07712e-09	0.00406302	0.150908	-0.000984546	0.00477328	-0.107558	2.92008e-80	0.00031964	2.22711e-13	-0.000548439	4.87073e-08	0.00136477	1.00003e-12	0.000521035	0.0445943	-0.000647186	0.081958	0.00107328	0.0485146	0.000672488	0.192222	0.00137246	0.015905	-0.0010041	0.116042	0.000280032	0.649989	1	0.848752
44201	USP25	0.0151956	0.558938	0.00518697	0.151123	0.000245149	0.582567	-0.0243266	0.000771259	0.00031385	1.75554e-08	-0.000519125	5.44715e-05	0.00140402	9.43042e-09	0.000603399	0.0681134	-0.00263893	3.13502e-08	0.000447222	0.518228	0.00145702	0.027561	0.000240678	0.74171	0.000895145	0.271917	0.00044245	0.576176	1	0.848752
49871	ECE1	-0.150369	1.79177e-32	0.00253231	0.151385	0.00239521	3.03857e-28	0.00345719	0.328025	8.43504e-05	0.00255546	0.000316583	8.32128e-07	-0.000217363	0.0745579	0.00013365	0.415963	0.000471705	0.0436434	-0.000625382	0.0708707	0.000321581	0.327539	-3.0659e-05	0.932289	0.000775211	0.0529996	-0.000458848	0.242801	1	0.848752
51631	HGF	-0.460628	6.66101e-251	0.00270883	0.151535	0.00985132	0	-0.126041	3.47548e-241	-0.000208218	4.31301e-12	-0.000571186	1.15674e-16	0.00180226	3.00044e-43	0.00132687	5.12585e-14	0.000668213	0.00748826	0.00105261	0.00482767	0.00136355	9.94703e-05	-2.43057e-05	0.949745	1.8683e-05	0.965185	-0.000612776	0.143341	1	0.848752
44414	PPIF	0.119171	9.0734e-08	0.00444675	0.151599	-0.000180188	0.637546	-0.00960167	0.121697	0.000118612	0.0129859	-0.000227099	0.0397301	0.00113374	6.77496e-08	0.000869251	0.0021439	-0.00071171	0.0819166	0.000606191	0.30736	0.00084608	0.134391	-0.000832455	0.182691	0.00121793	0.0809831	0.00167323	0.0136338	1	0.848752
51430	VWA1	-0.329296	4.04664e-99	0.00310775	0.151944	0.00673352	7.70205e-140	-0.0549919	1.0561e-36	1.06934e-05	0.756359	4.79894e-05	0.542691	0.00154978	3.60669e-25	0.0018624	3.43044e-20	1.32145e-06	0.996326	-0.000251545	0.556973	0.00087759	0.0293007	0.000210706	0.634439	-0.000819637	0.0955238	-0.000443156	0.356568	1	0.848752
43195	SCN2B	0.0125093	0.219595	0.00202754	0.152238	-0.000240536	0.168754	0.011641	3.98246e-05	-5.03227e-05	0.0212769	9.45893e-05	0.0604571	0.000151077	0.115156	8.45307e-05	0.514082	0.000153966	0.409355	0.000104819	0.69695	-0.000357815	0.166615	9.87664e-06	0.972337	-0.000925852	0.00362368	-0.000444633	0.152079	1	0.848752
49539	LCN2	-0.29518	3.41417e-99	-0.0027769	0.152427	0.00684616	4.2207e-179	-0.128023	3.9768e-235	-0.00105327	2.00244e-252	0.000462345	8.17934e-11	5.69085e-05	0.672678	-0.000545436	0.00271561	0.000944632	0.000238217	-0.000256283	0.512232	0.000780827	0.031221	-0.000126139	0.752176	-0.000971613	0.0271677	-0.000772184	0.0744389	1	0.848752
51631	CTSO	-0.236447	3.31734e-100	0.0022134	0.152991	0.00504188	1.94121e-153	-0.0697373	1.52616e-111	-0.000282338	2.37618e-30	-0.000403076	9.84804e-13	0.000811886	3.46736e-14	-0.000284198	0.0491852	-0.000690704	0.000748939	-0.000340344	0.266438	0.000791656	0.00585792	6.84899e-05	0.828534	-0.000501024	0.153464	0.000751725	0.0285723	1	0.848752
43232	GADD45GIP1	0.0160362	0.396449	0.00375505	0.153282	0.00102987	0.00149723	-0.017177	0.00109825	8.1175e-05	0.0456841	-0.000165089	0.0793822	0.00117808	4.0219e-11	0.00113917	2.25089e-06	-0.000274215	0.428424	0.000366556	0.466119	0.000576576	0.229302	0.00032161	0.543878	0.00197476	0.000880444	0.000587377	0.307134	1	0.848752
51631	CXCL6	-0.248038	1.33204e-19	0.00545301	0.153295	0.00467692	2.35771e-23	0.00602547	0.430456	0.000175143	0.0039464	0.00100341	5.94269e-13	0.00021262	0.420627	0.000241693	0.49745	0.000314505	0.533535	0.000895437	0.235657	0.000386242	0.585525	0.000511252	0.511989	0.000320654	0.710983	0.000469797	0.578909	1	0.848752
51505	HS6ST1	-0.10276	4.32181e-17	0.00243344	0.153639	0.000825396	8.23829e-05	0.11306	5.11935e-238	-0.000319331	4.91703e-32	0.000392954	2.35016e-10	-1.82349e-05	0.876745	-0.000103853	0.513895	-0.000754805	0.000821246	-0.000518691	0.123665	-0.000494126	0.118768	0.000289739	0.405858	0.000558808	0.148391	-8.73787e-05	0.817201	1	0.848752
50063	MMP7	-1.1479	0	-0.00350229	0.154057	0.0188554	0	0.102365	1.38556e-95	0.000520474	1.95934e-40	-7.08192e-05	0.429748	0.00125348	1.69663e-13	0.000636291	0.00555947	0.00070995	0.0291175	-4.89667e-05	0.918998	0.00115988	0.0110986	0.000977238	0.0514358	0.000186325	0.737882	0.000787151	0.149392	1	0.848752
47602	AMY2B	-0.199732	2.29102e-29	-0.00352472	0.154103	0.00346492	5.31509e-30	0.00718906	0.146714	0.00117643	6.33084e-192	-0.000919211	9.15304e-24	0.00153243	8.77593e-19	-0.00236945	1.6918e-24	-0.00133009	4.96987e-05	0.000848898	0.0863216	-0.000646332	0.159493	-0.000938899	0.0638491	-0.00195906	0.000498351	0.000125862	0.820061	1	0.848752
51206	SMPDL3A	0.000363789	0.987524	0.00461753	0.154537	0.000683848	0.0864776	-0.144186	1.18261e-108	-0.000189746	0.000242311	0.000887046	7.64985e-14	-0.00120325	8.34923e-08	0.000327862	0.27984	-0.000374402	0.383293	0.000277336	0.666639	0.000591351	0.328979	-0.00080359	0.227463	-0.00104479	0.155512	0.000960197	0.18359	1	0.848752
51430	LEFTY2	-1.09316	0	-0.00368841	0.15554	0.0157806	0	0.357904	0	0.000629786	1.77189e-52	-2.85714e-05	0.762106	0.000126967	0.47797	0.000595561	0.0139158	-0.00213977	4.78441e-10	-0.00143768	0.00505168	-0.00162666	0.000740894	0.000290367	0.584175	-0.00131763	0.0252073	-0.000679049	0.238035	1	0.848752
43120	PRSS22	0.0689705	4.18853e-08	0.00248566	0.155932	0.000127816	0.55358	-0.0852976	3.62639e-130	-0.00013249	8.96313e-07	-3.51489e-05	0.573825	2.60821e-05	0.826004	0.000410309	0.0104023	0.00133537	7.16198e-09	0.000671846	0.0436686	0.000272137	0.394534	-8.84481e-05	0.801902	0.000467228	0.235457	-9.48902e-05	0.804884	1	0.848752
51518	RGMB	-0.138997	6.98545e-49	-0.00186698	0.156408	0.00389437	6.91098e-127	-0.134279	0	-9.67029e-05	3.69557e-06	-4.83027e-05	0.31491	0.000734829	7.73359e-16	0.00035959	0.00348166	-0.00045931	0.00845444	-0.000442064	0.0903275	-0.000183478	0.454408	-0.00066529	0.0136679	0.000156943	0.599111	0.000155537	0.59591	1	0.848752
50441	PSME2	-0.0269762	0.0433197	0.00263544	0.156561	0.00211785	2.37478e-20	-0.151489	0	0.000231908	4.0565e-15	-0.000427804	2.7103e-10	0.00075715	3.7721e-09	8.25743e-05	0.635826	0.000129382	0.59942	0.00094146	0.00993307	1.80762e-05	0.958452	0.000831169	0.0287617	-0.000553272	0.190043	0.00050315	0.225019	1	0.848752
44300	CRYBB2	-0.674816	1.17354e-170	-0.00475294	0.156849	0.0140181	2.70062e-248	0.0571678	1.71222e-17	7.11498e-05	0.169694	-0.00107347	2.39501e-19	0.00155213	8.1499e-12	0.000153636	0.616253	0.00134061	0.00244066	0.000434876	0.498293	0.000606782	0.321505	-1.25194e-05	0.985226	0.00133474	0.0773744	0.000122436	0.867524	1	0.848752
44409	CMC1	-0.0329525	0.308222	0.00636326	0.156949	0.00120987	0.0291857	-0.00842752	0.348811	0.000371527	9.0191e-08	-0.000550764	0.000596124	0.00185711	1.10585e-09	0.00107469	0.00884096	-0.00306886	2.27074e-07	0.00147682	0.0892262	0.00156922	0.05549	-0.000577529	0.523965	0.00202665	0.045226	0.00131044	0.183369	1	0.848752
44480	CLU	-0.0579399	1.10351e-07	0.00214727	0.157399	0.000934644	5.96985e-07	0.0589345	1.46468e-83	5.06154e-05	0.0303682	0.000146204	0.00679055	-0.000135629	0.186635	0.000342148	0.0138213	-0.000379321	0.0579974	0.000140561	0.629091	-0.000186993	0.500246	-0.000599268	0.0506321	-0.000550447	0.107386	-0.000559396	0.0922634	1	0.848752
51228	XPNPEP2	-0.355791	3.46238e-24	-0.0069094	0.157727	0.000829791	0.167392	0.354599	7.798e-284	0.000904046	2.23152e-31	-0.00126487	1.54599e-12	-0.00108218	0.00139696	-0.00149281	0.00107504	-0.000328494	0.611638	0.000375984	0.698218	0.00135806	0.135114	0.00239589	0.0166254	0.000794945	0.472927	-0.00196393	0.0704586	1	0.848752
50836	OPTC	-0.639498	0	-0.00323047	0.157787	0.00930129	5.58454e-237	0.241429	0	0.000364601	9.72668e-24	-0.000562731	1.50216e-11	0.000285725	0.0709106	3.38416e-05	0.873866	-0.000230146	0.447451	-0.000611802	0.184803	0.000498921	0.239833	-0.000982166	0.0365167	-0.000199796	0.700362	-8.27165e-05	0.870763	1	0.848752
50593	EFNA4	-0.552361	0	-0.00216647	0.158051	0.0105553	0	-0.0370913	1.75022e-33	-0.000173418	1.15812e-12	3.94405e-05	0.479496	0.00147025	8.01149e-44	0.000170747	0.234547	0.000858325	2.37535e-05	8.51481e-05	0.777683	0.000418912	0.143332	0.000199157	0.525394	0.000633781	0.0686596	0.000876896	0.0103736	1	0.848752
44409	IGSF9	-0.89128	6.96139e-159	-0.00648101	0.15838	0.0185947	3.83598e-233	-0.169356	1.67084e-75	-0.000125801	0.0765189	-0.00174486	2.01052e-26	0.00279846	2.66037e-19	0.00374621	4.40989e-19	0.00395439	6.80546e-11	0.00148372	0.0947908	0.0037677	6.84448e-06	0.000688296	0.45742	-0.00029745	0.773664	-0.000655313	0.515051	1	0.848752
51076	CDH6	-0.48759	2.64428e-279	-0.00266431	0.158792	0.00812238	9.03021e-264	0.0640423	5.86048e-64	-0.000519704	1.72363e-66	0.000130991	0.0581472	0.00154754	3.7453e-32	-0.000691212	9.90839e-05	-0.00143448	1.01463e-08	-0.000488806	0.19197	0.000782958	0.0265661	-0.0004212	0.277351	0.000255099	0.551733	-0.000460035	0.275282	1	0.848752
43602	ARAF	0.149323	4.8037e-10	0.0046971	0.158923	-0.00136142	0.000937398	-0.00648824	0.330844	-4.84539e-06	0.924824	-0.000366415	0.00204733	0.00066404	0.00335403	0.000199349	0.514372	-0.00219915	5.67865e-07	0.00056347	0.377544	0.000398469	0.513952	0.000369624	0.582966	-0.000386328	0.606998	0.000199453	0.785882	1	0.848752
42948	NEB	-0.0780826	8.09488e-09	-0.00265362	0.159502	0.00272114	1.18712e-31	-0.0599528	8.41759e-57	8.32051e-05	0.00403623	0.000266396	6.55277e-05	0.000216223	0.0887917	0.000357898	0.0373645	-0.000868957	0.000475746	-0.000224845	0.528661	-0.000133778	0.69711	-8.73137e-05	0.817751	-0.000362693	0.391601	0.000566186	0.170324	1	0.848752
51291	BTN2A1	-0.444451	0	-0.00183252	0.159631	0.00822978	0	-0.0170083	7.20941e-11	-0.000396523	2.09343e-81	0.00011419	0.0163392	0.00121213	3.19015e-41	0.000368847	0.00248702	8.71623e-06	0.959714	-0.000362371	0.161476	0.000401461	0.0991136	-0.000611366	0.0223613	-5.71113e-05	0.846787	0.00131661	5.66118e-06	1	0.848752
43195	CGN	0.0143513	0.310456	0.0027592	0.160583	0.00035647	0.141884	0.00383599	0.329515	-9.03338e-05	0.00290858	3.62616e-05	0.60422	0.000274206	0.0394705	-0.00020577	0.252676	0.000325056	0.209696	-0.000245864	0.51063	-0.000815227	0.023241	-0.00011384	0.773458	-8.33097e-05	0.85046	-0.000152654	0.723244	1	0.848752
44326	GGCT	0.154738	2.52629e-19	0.00335654	0.160628	-0.00185604	3.25267e-10	-0.043819	5.73747e-20	0.000250924	1.17454e-11	-0.000290852	0.000653296	0.000933482	8.51542e-09	0.000770311	0.000423697	-0.000886558	0.00494638	0.00164951	0.000358378	0.000637791	0.143732	-1.86459e-05	0.969151	0.000213466	0.691747	0.00134229	0.0105099	1	0.848752
49787	FKBP7	0.0339521	0.0452915	0.00330362	0.162209	0.000331635	0.254239	0.00389737	0.410264	0.000139012	0.000205353	-0.00025551	0.00305315	0.000253437	0.121355	0.000403766	0.0670818	-0.000746157	0.0172048	0.000131566	0.776453	0.000444582	0.312434	3.38472e-05	0.944154	0.00129787	0.0155211	-0.000103855	0.843611	1	0.848752
43602	CD82	0.103817	2.21489e-12	0.00287293	0.162231	-0.000992671	9.11046e-05	0.0174627	2.18741e-05	-0.000121367	0.000126362	-3.46223e-05	0.636503	3.16673e-05	0.820491	3.95158e-05	0.833938	-0.000277948	0.305093	0.000211411	0.591239	-0.000174291	0.643303	-0.000478188	0.249245	0.00041535	0.369715	-0.000673755	0.136614	1	0.848752
44144	NUDT16	-0.181002	7.17331e-09	0.00606413	0.163152	0.0033486	4.36133e-10	0.0512103	4.03109e-09	0.000354153	1.27524e-07	-0.000467905	0.00257547	0.00240772	2.9922e-16	0.0017867	6.72659e-06	-0.000162246	0.777159	0.00102386	0.219323	0.00152479	0.0546173	-0.000500977	0.568227	0.00017724	0.856544	0.00138735	0.144793	1	0.848752
44220	MAP2K1	-0.219977	1.24202e-21	0.00445979	0.163388	0.00496234	3.51521e-36	-0.0432036	1.53134e-11	0.000258501	1.63923e-07	-0.000356631	0.00180608	0.00114262	1.36838e-07	0.0003477	0.234012	-0.00166123	8.23898e-05	0.000427326	0.486277	0.000681568	0.243251	-0.000120848	0.851656	0.000310934	0.666496	-0.000115399	0.869058	1	0.848752
42948	MMUT	0.119053	1.4906e-11	0.00342345	0.163569	-0.00115106	0.000142439	-0.0107915	0.0279702	9.25924e-07	0.980403	4.55848e-05	0.599986	0.000613507	0.000210165	8.58471e-05	0.701478	-0.000867719	0.00739622	0.000371206	0.424586	-0.000117182	0.793536	-0.000884516	0.0731364	0.000748749	0.174569	-0.000162155	0.763065	1	0.848752
44300	PTPRR	0.0755187	1.40951e-08	-0.00258004	0.163637	-0.00207414	1.09288e-19	0.0807826	6.6906e-105	-0.00028966	4.19355e-24	-0.000437256	3.11152e-11	0.000506614	5.23596e-05	0.000470142	0.00544237	0.00130427	9.11608e-08	-0.000690145	0.0514345	1.00185e-05	0.976332	-0.000821311	0.0276818	-0.000919197	0.0274885	-0.000634914	0.116931	1	0.848752
43232	ECHS1	0.0337963	0.330648	0.00672688	0.163755	0.00156743	0.00852225	-0.143045	2.0076e-49	0.0015881	5.50093e-100	-0.000397168	0.0215997	0.00240054	2.40862e-13	0.00211323	1.78995e-06	0.00227836	0.000341889	0.00273315	0.00309699	0.00180224	0.0408125	9.40343e-05	0.923042	0.00276775	0.0111573	0.00174077	0.0994528	1	0.848752
42978	KLRC1	0.147542	9.50499e-12	0.00419245	0.164067	-0.00104483	0.0048845	0.0152908	0.0111507	-8.75183e-05	0.0595341	0.000118262	0.270216	-0.000151464	0.458102	-0.000298279	0.277778	-0.000754547	0.0575822	0.000774605	0.174894	-0.00104428	0.0581453	-0.000258326	0.670269	-0.000257097	0.703925	-0.000371271	0.574529	1	0.848752
43434	FUOM	-0.459112	2.93865e-84	0.00455572	0.164372	0.0114688	1.30689e-175	-0.236609	2.48586e-281	0.000710195	6.84583e-45	-0.000506581	1.35248e-05	0.000461425	0.0373382	0.00073959	0.0138368	0.00202386	2.65351e-06	0.000978976	0.120255	0.00135471	0.0233258	0.000573036	0.384737	0.000974349	0.187932	-0.000232835	0.744607	1	0.848752
50997	AHSP	0.115274	0.00018362	0.00596808	0.164381	0.00329913	4.29752e-10	-0.533367	0	-0.00125966	4.11807e-76	-0.00059572	0.000137286	-0.000584097	0.0487336	-0.000150158	0.707523	0.00388345	8.22848e-12	0.00311134	0.000249696	0.00148843	0.062667	0.00350606	6.7808e-05	-0.00508737	1.80732e-07	-0.00178909	0.0611224	1	0.848752
51518	DDR1	-0.152047	2.29104e-76	0.00159019	0.164606	0.00361117	3.22488e-144	-0.0756841	9.17802e-237	-1.14317e-05	0.528763	0.000217478	1.90299e-07	0.000169719	0.0320845	0.000280078	0.008796	0.000309835	0.0408432	4.99098e-05	0.825757	0.00047268	0.0265061	-0.000138	0.555942	0.000583248	0.0245097	-0.000361073	0.156407	1	0.848752
50997	EFNA1	-0.400748	0	-0.00194727	0.16481	0.00700863	0	0.0413588	5.71034e-49	-0.000669414	6.23091e-197	6.56716e-05	0.198924	0.00109911	8.4307e-30	-0.000253857	0.0518398	0.000350021	0.05929	-0.000126371	0.648904	0.000100753	0.699566	0.000230356	0.423277	-0.000241669	0.447718	0.000921843	0.00310894	1	0.848752
51076	GHRL	-0.439859	3.26057e-50	-0.00570718	0.164843	0.00211577	2.87648e-05	0.517801	0	-0.0028913	0	0.00124194	1.42166e-16	-0.00314647	2.344e-28	-0.00190901	7.53684e-07	-0.00551975	3.70616e-24	-0.009092	6.3413e-29	-0.00389802	3.76858e-07	-0.00444993	1.29019e-07	-0.00346847	0.000196585	0.00171843	0.0607639	1	0.848752
51542	PLAT	-1.14743	0	-0.00373529	0.164963	0.0225383	0	-0.266105	0	8.92674e-05	0.0366774	-0.000675473	7.12823e-12	0.00180106	5.19505e-22	0.00186947	1.21098e-13	0.00413861	3.59179e-31	2.42904e-05	0.963588	0.00275104	4.10742e-08	-0.00019283	0.726346	0.000783996	0.198425	-0.000889266	0.13733	1	0.848752
51631	CXCL17	-1.72118	0	0.00342687	0.165252	0.0313226	0	-0.031584	1.67008e-10	-0.000369879	5.01257e-21	0.000186908	0.0380048	0.000122236	0.47405	0.000765671	0.00088897	0.00356488	1.07629e-27	0.000996072	0.0413703	0.00157646	0.00057851	0.00143615	0.00439704	0.00236763	2.33531e-05	-0.000926638	0.0905298	1	0.848752
50140	VSTM2L	-0.0117294	0.569575	0.00398643	0.165282	0.000428047	0.226247	0.0364146	2.56674e-10	6.33473e-07	0.988938	-6.91432e-05	0.509895	0.000134221	0.499776	8.22376e-05	0.759383	-0.000286131	0.45204	0.000333924	0.553397	0.000305969	0.566947	-0.000241823	0.680354	9.48469e-05	0.88415	0.000664143	0.298297	1	0.848752
42978	RAB3GAP1	0.181576	6.51716e-19	-0.00394472	0.165381	-0.00187941	8.17058e-08	0.0086581	0.12786	-0.000147178	0.000787752	0.000169371	0.0943289	0.000268054	0.164156	-0.000149259	0.565012	-0.000353866	0.345412	1.25871e-06	0.998136	-0.00070812	0.173459	9.48117e-05	0.868496	-0.000781036	0.221265	7.24463e-07	0.999074	1	0.848752
44201	PCSK7	0.0526658	0.00100004	0.00308484	0.16542	-0.000516562	0.0598973	0.0108303	0.0149973	-0.000670665	7.07145e-85	0.000363525	4.41093e-06	-0.00012064	0.422832	-0.000139554	0.493053	-2.16272e-05	0.941256	0.000212081	0.618654	0.00093035	0.0222642	-0.00042239	0.347357	-0.000981492	0.0503405	0.000856715	0.0786815	1	0.848752
42820	PDE1C	0.153947	4.71797e-15	-0.00378592	0.165788	-0.00130441	0.000108538	0.0124005	0.0232893	-7.36866e-05	0.0789125	0.000127146	0.18717	4.38732e-05	0.811118	0.000357978	0.150979	-0.000224795	0.532505	0.000530502	0.306022	7.98075e-05	0.872893	-0.000785957	0.15264	-0.0009122	0.137857	-4.64129e-05	0.938311	1	0.848752
42820	PDXDC1	0.105546	3.82634e-07	0.00400464	0.165909	-0.000583436	0.101762	0.0300302	2.08287e-07	0.000294137	3.42453e-11	-0.000297148	0.00357667	0.000861235	9.28079e-06	-0.000582441	0.0272259	0.0013094	0.000590326	0.000921038	0.0930381	0.00115966	0.028018	0.00266492	4.58603e-06	0.000978528	0.132492	0.0013147	0.0382779	1	0.848752
44220	HDDC2	0.0912008	6.32273e-09	0.00302384	0.166013	-0.000464674	0.0844644	-0.0690307	4.4062e-56	-0.00063533	4.45507e-79	-0.000874841	3.5532e-29	0.000386493	0.00897939	0.000226023	0.256828	9.75363e-05	0.734708	0.000563632	0.178298	-0.000274446	0.491004	0.00113686	0.00992449	-0.00184097	0.000184238	0.00017204	0.718672	1	0.848752
44409	L3HYPDH	-0.00574458	0.85712	0.00614341	0.166049	0.00115533	0.0347844	-0.0174847	0.0488282	0.000486435	1.3157e-12	-0.000547696	0.000539204	0.00184773	8.01484e-10	0.00150366	0.000205084	-0.000147635	0.800733	0.000937276	0.274298	0.0010605	0.189608	-0.000140756	0.874918	0.00107771	0.280442	0.0012599	0.194813	1	0.848752
43120	FGF20	0.106096	7.47321e-12	0.00298645	0.166239	-0.000585532	0.0275397	0.0114194	0.00809609	-0.000173532	1.735e-07	2.75908e-05	0.719953	-0.00016896	0.247505	0.000238063	0.227336	-0.00067199	0.0180151	0.000578912	0.158074	-0.000602529	0.125811	-0.000414306	0.339912	0.000210665	0.663991	-0.000117514	0.803795	1	0.848752
44409	ELN	-2.21853	0	-0.00238566	0.166264	0.0373348	0	0.181052	0	-0.000943457	5.67912e-271	0.000428793	3.13236e-12	-0.000266397	0.0225728	0.000303138	0.0540348	-0.000509138	0.0250726	-0.00010326	0.756565	0.000313867	0.317686	0.000292315	0.40012	-0.000242762	0.531466	0.000655857	0.0823785	1	0.848752
51431	AMBP	-0.483304	0	-0.00141613	0.166735	0.00895094	0	-0.0448122	2.03614e-105	-0.000213055	3.75882e-39	1.59438e-05	0.66836	0.000928248	1.91098e-39	0.000378532	7.41756e-05	0.000218144	0.107479	-0.000434067	0.0318388	0.00013514	0.477293	-0.000278453	0.183329	-0.000629652	0.00669355	0.000194037	0.392578	1	0.848752
49871	ATF2	0.312808	2.16579e-37	-0.00471223	0.166899	-0.00291651	3.64233e-12	0.00249142	0.715149	-0.000228612	2.30583e-05	0.000189818	0.126041	-0.000519718	0.0272806	1.20859e-06	0.996961	0.000633677	0.160537	-0.000531306	0.426876	0.000484185	0.445316	-8.71748e-05	0.900459	0.000171957	0.824138	0.000244794	0.746974	1	0.848752
42948	ABCA2	-0.305349	2.4482e-123	0.00248036	0.167141	0.00583978	1.54508e-152	-0.0240247	2.16233e-11	-0.000258796	5.91712e-21	0.000111383	0.0794836	0.000456912	0.000158145	0.000320462	0.0501891	-0.000376969	0.111253	-0.000337892	0.319861	0.000106742	0.74421	0.000190312	0.597714	-0.00101024	0.0121765	0.000438635	0.264409	1	0.848752
43232	DNAJC6	-0.0472769	0.118575	0.00581429	0.167435	0.00262661	4.29269e-07	-0.103664	1.04369e-34	-0.000900865	1.66602e-43	-0.00106185	1.88492e-12	0.0023856	7.00086e-17	0.000933412	0.0155348	-0.00235796	2.12915e-05	0.00134818	0.0942278	0.000922109	0.230011	0.000979431	0.24849	0.000977972	0.303722	0.000448574	0.626308	1	0.848752
51082	ALDH1A1	0.0566577	0.00437707	0.00382206	0.167544	0.00309204	1.22496e-19	-0.308478	0	0.000242961	3.29069e-08	-0.00110718	5.06713e-28	0.00112786	3.68152e-09	-0.000106853	0.678833	0.00104396	0.00439968	0.00258956	2.34308e-06	0.00111544	0.0305321	0.00258641	5.28661e-06	-0.000874242	0.164531	0.000120311	0.845171	1	0.848752
43232	RANBP1	0.00342663	0.856787	0.00364053	0.167929	0.00129098	7.36839e-05	-0.118694	3.93311e-111	0.000279748	7.02839e-12	-0.000499185	1.27589e-07	0.000793796	9.33797e-06	0.000191691	0.427935	-0.000462245	0.183686	0.000992434	0.0493903	-6.54418e-05	0.891904	0.00111454	0.0361828	-0.00113161	0.0576432	0.000623849	0.280015	1	0.849231
44329	SAFB2	-0.0249525	0.0107859	-0.00187027	0.169187	0.000685022	4.49341e-05	-0.0129031	2.14528e-06	-3.48687e-05	0.0967788	6.48086e-05	0.180393	0.000295272	0.00134231	9.24577e-05	0.457482	-5.86375e-05	0.743907	0.000246359	0.344166	-0.000480898	0.0529071	-0.000257564	0.347347	-0.000658279	0.0316107	-0.000335379	0.260131	1	0.852867
51006	CD177	-0.618915	1.49278e-42	-0.00865876	0.169311	0.00622413	1.02534e-15	0.11036	2.35265e-18	0.00168552	1.33776e-63	-0.00161875	1.81302e-12	-0.000555777	0.201953	-0.00137999	0.0189039	-0.00307299	0.000228913	0.000691092	0.579469	0.00285161	0.0151106	0.00124562	0.334965	0.000388512	0.78606	-0.000619068	0.658751	1	0.852867
49867	FMR1	0.0178094	0.15683	-0.00240856	0.169792	-0.000265709	0.217927	-0.0123496	0.000436829	-9.86252e-07	0.971714	-7.38299e-05	0.248296	0.000240184	0.0475353	-9.68349e-05	0.552534	-0.0011484	7.83232e-07	0.000278936	0.418606	0.000331437	0.308523	-0.000103506	0.772802	0.000148152	0.709831	0.000421729	0.277974	1	0.852867
44201	LARP1	0.162545	7.39921e-13	0.00431878	0.170166	-0.00133767	0.000578525	-0.0088174	0.161855	-4.36437e-05	0.368489	-0.000550323	9.14637e-07	0.000484627	0.0229494	-3.33528e-05	0.907877	-0.00199769	1.52882e-06	0.00138834	0.0213599	3.28608e-05	0.954521	-2.16517e-05	0.972857	-0.000724719	0.307376	-9.95162e-05	0.88528	1	0.852867
44409	PGD	-0.299773	3.12466e-54	0.00367939	0.170391	0.00627619	8.73643e-80	-0.0682615	5.87665e-37	0.000303773	2.47504e-13	-0.000329695	0.000575728	0.00091974	4.29528e-07	-7.18953e-05	0.769211	-0.00102478	0.00378655	0.000351932	0.497503	0.000480287	0.32618	0.00106678	0.0486426	-0.000517966	0.391254	0.000756987	0.197953	1	0.852867
43979	PALM	-0.57263	0	-0.0021869	0.170412	0.00970605	0	0.0707113	4.01686e-108	-9.39104e-05	0.000136338	0.0001257	0.027148	0.00135587	3.92277e-36	0.000969487	2.80776e-11	-0.00106262	4.45086e-07	-0.000294425	0.334929	0.000560778	0.0540827	-0.000285784	0.374431	-0.000419314	0.243478	0.000798204	0.0222523	1	0.852867
49867	SFTPA2	-0.348867	6.49047e-75	0.00363387	0.17069	0.00725338	4.2199e-109	0.0137896	0.00939475	-0.000725574	1.62031e-66	-0.000692047	8.31334e-13	0.000457353	0.0125752	-8.65922e-06	0.971976	0.0015017	1.93462e-05	0.000297414	0.568391	-0.00021764	0.658284	-3.45339e-05	0.9492	0.00252959	2.64995e-05	-0.000418507	0.476416	1	0.852867
49233	CD59	-0.394719	0	-0.00158246	0.172651	0.00863779	0	-0.147981	0	3.80144e-05	0.0394807	7.60037e-05	0.0744221	0.000926781	1.95954e-30	1.61942e-05	0.88238	-0.000481977	0.00172508	0.000558268	0.0157874	-6.94444e-05	0.749322	-0.000170415	0.474796	-3.30031e-05	0.899968	0.000894037	0.000580748	1	0.857189
50116	IL2	-0.0369923	0.000918216	0.00211909	0.172725	0.000354545	0.0639717	0.00107373	0.730228	-3.01296e-05	0.223463	-8.85472e-05	0.119266	8.53748e-05	0.427745	0.000146664	0.311489	5.7671e-05	0.779347	0.000273621	0.369342	0.000204976	0.477796	0.00043321	0.172966	-0.00046606	0.186673	1.21663e-05	0.97186	1	0.857189
51706	LTBP2	-1.57003	0	0.00215498	0.173056	0.0269106	0	0.0928165	2.1642e-187	0.000185971	1.35767e-13	0.000252825	1.24496e-05	-0.000738514	1.65131e-11	-3.27443e-05	0.825005	-0.000288553	0.168013	0.000117967	0.706334	0.000114721	0.696918	0.000105753	0.744105	-0.000196264	0.583998	-0.000100012	0.776058	1	0.857189
44329	GART	0.0229708	0.014386	-0.0017768	0.173205	0.000214823	0.18204	-0.036365	5.16626e-44	-0.000260327	3.6163e-38	0.000179265	0.000111789	-8.66942e-05	0.32617	0.000185025	0.12103	2.72629e-05	0.874153	-0.000495695	0.0471735	6.60124e-05	0.781719	-0.000375673	0.152918	-6.22022e-05	0.832275	0.000499583	0.0802648	1	0.857189
43120	MKI67	0.0837409	3.79608e-09	-0.00269415	0.173377	-0.00036227	0.137181	-0.0218296	3.43963e-08	-0.000118704	9.73897e-05	-6.29827e-05	0.372308	0.000274687	0.0404175	0.000368046	0.0418951	-0.000383184	0.141475	-0.000285202	0.448398	-0.000553677	0.125159	-0.000345119	0.386157	-0.000839391	0.0591824	-0.00117286	0.00687405	1	0.857189
50678	FUT8	-0.0933447	6.1884e-06	0.00391484	0.173698	0.00266181	5.79145e-14	0.0257884	7.69305e-06	0.000992825	4.86693e-104	0.00103199	6.43167e-23	6.65297e-05	0.73749	-0.000703046	0.00905719	-0.000603603	0.112936	0.0006594	0.243913	0.000552152	0.303576	-0.00058162	0.322827	0.000424656	0.515465	0.00178054	0.005501	1	0.857189
42948	ATP2B4	0.221619	9.25121e-23	0.00427296	0.173959	-0.00162329	2.73713e-05	0.0345299	3.8536e-08	-0.000307271	1.86569e-10	0.000382423	0.000582462	-0.00043577	0.0395368	0.000205581	0.47292	-0.00074865	0.0707782	-0.00113198	0.0569339	-0.00124372	0.0298667	-0.00105619	0.0943159	-0.00102586	0.145834	-0.000173868	0.800478	1	0.857189
51518	ROBO2	-0.373427	0	0.00155555	0.175138	0.0051797	4.68032e-291	0.15543	0	-0.00017688	2.57656e-22	0.000216967	2.18781e-07	0.000241012	0.00240066	0.000137535	0.199438	0.0002	0.187953	0.000554301	0.0147509	0.00115823	5.90566e-08	-0.000210373	0.370605	0.000200758	0.440051	0.000592936	0.0202777	1	0.857189
44220	ATRAID	-0.336485	2.1999e-224	-0.00197197	0.175235	0.0067692	1.76592e-306	-0.0393784	1.32581e-41	0.000147805	4.55053e-11	0.000190803	0.000240572	0.000985234	1.68259e-23	0.00026633	0.0449527	0.00015647	0.414609	0.000161727	0.562182	-4.82548e-05	0.855798	-0.000167307	0.569033	9.49515e-06	0.976906	0.000550315	0.0837686	1	0.857189
44300	AK2	0.0362656	0.33728	0.00712145	0.175681	-0.000709871	0.273542	-0.0279624	0.00784157	8.40252e-05	0.300548	-0.00032801	0.0792452	0.0017855	5.14914e-07	0.00118288	0.0137708	-0.00286646	3.52637e-05	0.000263288	0.79353	0.000135503	0.887608	-0.00048174	0.649203	0.000927243	0.433474	0.000305577	0.79042	1	0.857189
43434	MENT	0.110775	7.15517e-42	-0.00153695	0.175814	-0.00355611	2.92886e-141	0.153735	0	7.4039e-06	0.671989	0.000168511	2.9523e-05	-1.86292e-05	0.808331	0.000588132	1.62573e-08	-0.000448747	0.00265609	-0.000527777	0.015644	-0.000444598	0.0317123	-0.000668857	0.00341581	0.000310219	0.226361	-0.000105194	0.671043	1	0.857189
51207	CCL24	-0.410968	3.34851e-44	-0.00555491	0.175858	0.0101701	6.68199e-90	-0.204289	1.5203e-135	-0.00212543	4.25643e-230	0.000954448	1.92359e-10	0.00126142	8.76523e-06	-0.00027983	0.465959	0.00162593	0.00278338	-0.00082198	0.31301	0.0013019	0.0893075	0.00169146	0.0446859	-0.00080116	0.389557	-0.00148225	0.104565	1	0.857189
44220	OTUD6B	0.0797451	0.000139285	0.00393526	0.176365	-0.000779757	0.0298908	-0.0184831	0.00150926	8.98494e-06	0.841393	-0.000376072	0.000297633	0.0010713	5.59329e-08	0.00061634	0.0203886	-0.00164669	1.78221e-05	0.000556591	0.318788	0.000628985	0.236468	-2.67886e-05	0.963651	0.000233845	0.721603	0.000468192	0.462161	1	0.857189
51706	PCSK9	-0.564509	0	-0.00268529	0.176468	0.00886062	1.88963e-284	0.126965	1.48767e-221	-8.02374e-05	0.0109984	-0.000770912	2.87595e-26	0.00112984	2.373e-16	0.000239473	0.197922	0.000213795	0.416066	-0.000402942	0.305515	0.000571142	0.122628	-0.000445495	0.273594	-0.000217813	0.628514	-0.000788215	0.0742724	1	0.857189
42948	EXTL1	0.00888659	0.601537	-0.0032045	0.176558	0.00107142	0.0002432	-0.0222599	2.63424e-06	0.000373205	1.13539e-24	0.000115816	0.167352	0.000204827	0.199673	-0.000820733	0.000146137	-0.00127224	4.71079e-05	-0.00025077	0.57615	6.84401e-05	0.874134	0.000142511	0.764779	-0.00028179	0.596447	-0.000426853	0.410867	1	0.857189
42978	KLF4	-0.226735	7.81064e-54	-0.00275596	0.176696	0.0050555	1.42513e-89	-0.0655112	7.17642e-58	5.84989e-05	0.062868	-9.25347e-05	0.202609	0.000407284	0.00321328	0.000596151	0.00135755	0.000782519	0.00363316	-0.000256562	0.506913	-0.000396003	0.288635	0.00119197	0.00371394	-0.000669824	0.143661	-0.000503558	0.260774	1	0.857189
51121	LHPP	0.105501	9.22015e-07	0.00404619	0.177058	0.00120056	0.00112595	-0.23408	0	0.000243964	3.26759e-07	0.000482404	1.07678e-05	-0.000379302	0.0674575	0.000108671	0.69843	0.00135073	0.000666776	0.00205761	0.000541002	-0.000377323	0.500649	0.0016113	0.00884129	-0.00193785	0.00436506	0.000621507	0.352112	1	0.857189
51076	EIF4EBP1	-0.0371549	0.11625	0.00444565	0.177425	0.00338128	7.99657e-17	-0.195109	2.84904e-190	0.000146904	0.00516042	-0.000675635	2.08762e-08	0.00107814	2.36259e-06	0.000649605	0.0358464	0.000544578	0.21218	0.00193664	0.00302518	0.00118291	0.0546013	0.00244304	0.00030159	-0.00048319	0.517865	0.000791559	0.28158	1	0.857189
50836	GALNT10	-0.375352	3.11406e-302	0.00188476	0.177609	0.00719201	0	-0.0571846	2.78705e-92	-0.000410722	2.59823e-76	-0.000169788	0.00086527	-0.000111054	0.250839	6.94664e-05	0.593989	-0.00040588	0.0284114	-4.88114e-05	0.862592	4.55199e-05	0.860742	-0.000523284	0.0683725	6.07384e-05	0.84823	-0.000159506	0.607811	1	0.857189
50751	FLT1	-0.123972	2.92446e-55	-0.00148397	0.178149	0.00286861	7.19387e-99	-0.0487486	1.64516e-107	0.00016623	2.067e-21	0.000188791	2.62888e-06	-0.000131056	0.0857111	0.00026742	0.00921489	8.85573e-05	0.544115	5.15118e-05	0.816657	0.000282503	0.167009	-2.16528e-05	0.923755	0.000516666	0.039009	-0.000391318	0.110217	1	0.857189
50836	VAT1	-0.183076	1.87764e-146	0.00132832	0.178225	0.00324397	3.83977e-156	0.00825812	2.95107e-05	-2.45001e-05	0.117543	2.36387e-05	0.511095	-9.68924e-05	0.155738	-0.000180919	0.049177	-0.000603285	3.92953e-06	9.66038e-05	0.627436	-0.000242024	0.18631	-3.088e-05	0.878878	-0.000474866	0.0340101	0.00035661	0.104019	1	0.857189
49867	PRKRA	-0.0790665	0.0011119	-0.00454584	0.178897	0.00392857	3.53125e-21	-0.179134	2.87326e-153	0.000305017	1.28564e-08	-0.000680806	3.35459e-08	0.00142646	1.03579e-09	0.000235186	0.454249	-0.0017343	0.000108881	0.000424879	0.522739	3.39851e-05	0.956802	-0.000165425	0.810821	0.000101259	0.895043	-0.000489717	0.513422	1	0.857189
44139	LMNB1	-0.495255	1.59097e-113	0.00407116	0.179428	0.00915742	1.83243e-131	-0.0419192	4.97783e-12	-6.47743e-05	0.166504	0.000180534	0.0953237	0.000173956	0.396872	0.00022429	0.417646	0.000735057	0.0659683	-0.000270894	0.641119	0.000697468	0.207342	0.000279378	0.64801	-0.00222082	0.00115752	-0.000163672	0.805029	1	0.857189
43434	DIPK2B	-0.323661	7.81463e-228	0.00186334	0.179666	0.00420848	2.01828e-132	0.179804	0	-0.000218497	1.79674e-24	0.000251481	3.4664e-07	-0.000178429	0.0575064	0.000540183	2.22356e-05	-0.000586452	0.0013249	0.000471634	0.0774107	2.38079e-06	0.992497	-0.000214615	0.442479	1.66474e-05	0.957671	-0.000355198	0.241026	1	0.857189
44220	SNX18	0.312714	5.8883e-86	0.00295839	0.180331	-0.00442873	2.94221e-59	0.0410674	1.5659e-20	-0.000303583	5.18469e-19	0.000105401	0.18141	0.000248025	0.0973748	-0.000102374	0.611624	-0.000774021	0.0078492	-0.00022551	0.594434	-0.000241997	0.548255	0.00035472	0.42638	-0.00128831	0.00967044	5.08502e-06	0.991601	1	0.857189
44300	LMNB2	-0.51523	0	0.00193799	0.180755	0.00983429	0	-0.0488117	1.45732e-63	6.10922e-05	0.00626303	0.000282688	3.95712e-08	0.000452112	3.88611e-06	0.000405354	0.00217192	0.000328505	0.0850906	0.000311063	0.261411	-0.0004685	0.0759451	-4.4717e-05	0.878122	-0.00023784	0.465582	-0.000403982	0.201931	1	0.857189
43602	OFD1	0.251528	7.01218e-27	-0.00435744	0.180783	-0.00197597	8.75954e-07	0.0243068	0.000191094	-0.00017886	0.000361333	-4.74075e-05	0.682862	1.73928e-05	0.937283	5.16109e-06	0.986207	0.0002614	0.542551	0.000937168	0.132829	0.000533036	0.371232	8.49618e-05	0.89716	-0.000348335	0.634815	0.000202497	0.777592	1	0.857189
42820	MANEAL	-0.0596822	0.000940639	0.00335666	0.180965	0.00091956	0.00296857	-0.00749345	0.135536	-0.000129443	0.000778564	-0.000322794	0.000266778	0.000152599	0.365465	0.000539865	0.0183777	0.000679643	0.0399162	0.000305323	0.521255	-0.000414712	0.365398	-2.53579e-05	0.95993	0.000168262	0.765705	-0.000377733	0.492858	1	0.857189
44401	IGLC2	-0.144961	1.15239e-59	0.0016545	0.18101	0.00344135	3.04663e-112	-0.034269	1.35324e-43	0.000228749	3.0864e-33	-0.00033867	1.3153e-14	0.000646328	1.06533e-14	0.000251717	0.0261386	0.00103796	1.86521e-10	0.000365406	0.122845	0.00112684	6.08019e-07	0.000150224	0.547426	4.80998e-06	0.986215	0.000128936	0.633554	1	0.857189
44402	CFHR4	-0.423669	5.45048e-61	0.00477729	0.181277	0.00463436	7.33081e-26	0.0996544	4.05579e-44	-3.43733e-05	0.532226	0.0016435	3.05649e-38	0.00149688	5.71183e-10	0.00194634	2.59693e-09	-0.000447246	0.342093	-0.00101713	0.137182	0.00168219	0.00993406	0.00198042	0.0060345	-0.00260402	0.00120622	0.000102522	0.895615	1	0.857189
49867	UXS1	0.343491	1.13282e-74	0.00349632	0.181374	-0.00431157	6.39343e-41	-0.167274	9.99338e-222	-0.00046526	3.58573e-29	0.000233062	0.0145211	0.000392421	0.0299168	-4.10954e-06	0.986512	-0.000798871	0.0211855	0.000545703	0.288583	0.000133739	0.782873	-0.00160477	0.00268341	0.000424668	0.474435	-0.000608847	0.293535	1	0.857189
50059	BMP6	-0.177026	2.52896e-33	0.00273472	0.18185	0.00394835	4.21435e-55	-0.0674403	1.8204e-60	0.000194445	2.40615e-09	-0.000517513	4.81807e-12	0.000994337	2.46994e-12	0.000963453	4.98402e-07	-9.64964e-05	0.722137	0.0011067	0.00585407	0.00055316	0.147023	-0.000170722	0.683354	0.00170736	0.000233953	0.000309221	0.497531	1	0.857189
51082	PARK7	0.0731721	0.00010972	0.00351697	0.181933	1.646e-05	0.959524	-0.121575	9.62157e-117	0.000375602	2.8175e-19	-9.97493e-05	0.298419	0.00102986	1.50889e-08	0.000753254	0.00215665	-0.00106616	0.00223521	0.0010115	0.0525579	0.000763939	0.119437	0.000415877	0.441558	-2.09047e-05	0.972132	0.00114106	0.051576	1	0.857189
42948	CASQ2	0.0775141	7.38736e-06	0.00320691	0.183178	-0.000441242	0.136935	0.0164795	0.000619909	-0.000129849	0.000442954	0.000117475	0.168091	-0.00010197	0.529769	0.000274876	0.21064	0.000331985	0.29593	-0.000404409	0.374955	9.51455e-07	0.998271	1.99344e-05	0.967144	-0.000143823	0.790254	0.00016339	0.756712	1	0.857189
51706	FAP	-0.230007	4.44912e-121	0.00181939	0.183251	0.00451875	4.93643e-158	-0.0533903	1.79484e-84	0.000615019	4.01335e-175	-0.000281782	1.76057e-08	-0.000104712	0.269214	0.0006742	1.39049e-07	-0.00122867	1.12095e-11	0.00186368	5.77042e-12	-0.000632156	0.0130288	-0.000549359	0.0497875	0.000404343	0.191856	-0.000524491	0.084366	1	0.857189
44414	ISM2	0.00962522	0.532335	0.00285157	0.183517	-0.000143516	0.587294	0.00450299	0.293783	4.05558e-05	0.219228	-0.000172541	0.023823	0.000284685	0.0499411	-2.29186e-05	0.906808	-0.000609431	0.03119	-0.000243627	0.552922	-7.91713e-06	0.983835	-4.12028e-05	0.924	0.000152556	0.751885	0.000386565	0.409756	1	0.857189
50999	SCRN1	-0.194146	3.02712e-22	0.00370817	0.183807	0.00443889	3.2379e-38	-0.0234032	2.83718e-05	-0.000169447	0.000136965	-0.000138811	0.172798	6.00007e-05	0.755773	-0.00027893	0.285731	-0.0024965	1.48185e-11	-0.000125077	0.820107	-0.000721729	0.164267	-0.000190708	0.738109	0.000958043	0.129827	0.000321225	0.604528	1	0.857189
50510	SETMAR	-0.271123	9.68503e-129	0.00207379	0.183961	0.0061474	1.85302e-222	-0.131589	0	0.000561237	6.61648e-113	4.09701e-05	0.470196	0.000715207	3.10645e-11	0.000311367	0.033265	-0.000533766	0.00975717	0.000533562	0.0817414	-0.000208496	0.474106	-0.000498957	0.117746	-0.00130045	0.000237506	-0.000282048	0.417782	1	0.857189
43232	MYBPC2	0.308993	1.37417e-24	-0.0055574	0.185253	0.00259659	5.23133e-07	-0.429391	0	0.000629548	2.75708e-22	0.000489886	0.00110303	0.000691712	0.0150666	9.71156e-05	0.800452	-0.000538995	0.329235	-0.000949334	0.236761	-0.00252194	0.000981563	0.000126086	0.881431	-0.00146125	0.122873	0.000903382	0.324857	1	0.857189
44247	TALDO1	0.0121128	0.456693	0.0029984	0.1853	0.00163687	4.56894e-09	-0.150002	1.17664e-237	0.000116865	0.000798335	-0.000388289	1.43596e-06	0.0010262	2.1772e-11	0.000574259	0.00549757	-0.000193667	0.516497	0.00067661	0.11813	0.000793705	0.0545008	0.000698135	0.125627	-0.000118228	0.816345	0.000442694	0.371688	1	0.857189
49867	MAGED1	0.0680105	7.46952e-05	-0.00316863	0.185768	-0.000626252	0.0333864	0.00856828	0.0738299	-0.000154572	4.6783e-05	-0.000111138	0.202937	0.000340089	0.0398277	0.000173289	0.436144	-0.00124198	9.08295e-05	-4.84972e-05	0.91794	-0.000404917	0.362057	-0.000517716	0.290073	1.39567e-05	0.979513	0.000309555	0.559621	1	0.857189
44414	FGFBP2	-0.362817	4.43239e-92	-0.00327261	0.185878	0.0063672	2.9411e-96	0.0550621	1.02227e-28	0.0010069	8.04181e-153	0.000523771	2.76898e-09	-0.00022489	0.179523	0.00153567	1.07251e-11	-0.00197306	1.49778e-09	0.000633305	0.181277	-0.000749392	0.0964871	0.000720643	0.148171	-0.00133343	0.0166256	0.00167498	0.00196542	1	0.857189
50836	AMIGO2	-0.0391284	1.7965e-06	0.00150777	0.186636	0.000279267	0.0468728	0.0345662	1.75637e-51	8.64426e-05	1.82477e-06	-5.52506e-05	0.1844	0.000346747	1.13412e-05	-7.364e-05	0.488975	0.000485354	0.00133253	-0.000338416	0.141749	4.3477e-06	0.983631	0.000197973	0.398494	6.70362e-05	0.795916	0.000180854	0.476152	1	0.857189
49867	EGFL7	-0.554223	0	0.0026433	0.186684	0.0113212	0	-0.113846	3.4064e-176	-0.00037845	9.72917e-33	-0.000650162	5.25766e-19	0.00151833	5.2374e-28	0.00017502	0.346781	0.000351538	0.185068	-0.000215275	0.584318	-0.000254404	0.49332	-0.000788798	0.0538255	-8.00794e-05	0.860089	-0.000163596	0.712254	1	0.857189
51631	FLT3LG	-0.831239	0	-0.00222681	0.186759	0.0138794	0	0.0841693	2.03729e-136	4.85321e-05	0.0705527	-4.78719e-05	0.436517	0.000208865	0.0732839	0.00128488	3.24691e-16	8.31039e-05	0.709542	0.000524591	0.115732	-0.00139151	8.6829e-06	-0.000179158	0.602889	0.000230725	0.546094	-0.00115759	0.00196261	1	0.857189
43844	MBL2	0.22974	2.56343e-09	0.00706849	0.187672	-0.00330249	5.94146e-07	-0.210454	2.21144e-85	-0.000905414	5.92268e-28	-0.00125734	4.12409e-11	-3.64083e-05	0.920023	-0.00132109	0.0071997	0.000343535	0.626464	8.65383e-05	0.932794	-0.000395858	0.68676	0.00199854	0.0648467	-0.000143018	0.905915	0.00178245	0.129316	1	0.857189
50999	IL5RA	-0.494811	9.55917e-137	0.00364061	0.187764	0.00968833	2.84782e-177	-0.0661223	8.09168e-33	0.00172695	0	-0.00195856	1.11643e-83	0.00268282	1.09386e-44	-0.00163348	2.79835e-10	9.03949e-05	0.805095	0.000156533	0.773894	-0.000626089	0.223246	0.00202072	0.000348845	0.000656244	0.294915	0.0010944	0.0748968	1	0.857189
51206	DNPH1	0.0613156	0.00109265	0.00344792	0.187777	0.00053106	0.0990467	-0.141914	2.97686e-160	0.000476844	3.25217e-30	-0.000464702	1.2125e-06	0.000927276	3.09595e-07	0.000101632	0.67809	9.79699e-05	0.77743	0.00108245	0.0372389	0.000657285	0.17883	0.0014952	0.00539659	-0.00181344	0.00225472	0.000679937	0.243316	1	0.857189
42948	NPR1	0.19708	1.07376e-41	0.00266824	0.188224	-0.00215539	6.20348e-18	-0.0142209	0.000449015	-0.000278611	3.46733e-19	0.000197592	0.0058771	-0.000360219	0.00835572	2.64993e-05	0.885982	-0.000779826	0.00353374	-0.000631313	0.0998361	-0.00119697	0.00119741	-0.00108393	0.00778847	0.000431723	0.342798	-0.00088034	0.0473387	1	0.857189
44220	GIPC3	0.0512986	0.142171	0.00638684	0.188781	-0.00242404	5.28224e-05	0.00463922	0.633369	0.000143737	0.055206	-0.000557368	0.00132313	0.00173375	1.40653e-07	0.000501568	0.25834	-0.00396336	6.24442e-10	0.000721168	0.439147	0.00149953	0.0909635	-6.4465e-05	0.947632	0.00112936	0.302717	0.000252162	0.812518	1	0.857189
50699	HSPG2	-0.503529	0	-0.0017818	0.188959	0.00983924	0	-0.0689626	2.53795e-141	-0.000124147	8.29087e-09	0.000157753	0.00149163	0.000707196	5.41715e-14	0.0005827	4.55348e-06	-0.0001766	0.325732	0.00022697	0.402413	0.000142843	0.572188	7.53721e-05	0.786428	0.000168215	0.583948	0.000197433	0.512918	1	0.857189
42391	NHLRC3	-0.47898	0	0.00217588	0.189157	0.00795406	0	0.0505857	1.81999e-52	-0.000174636	7.66779e-12	-0.00028645	1.07706e-06	0.000940426	4.23464e-17	0.00085113	2.21085e-08	0.000685124	0.0016742	9.74042e-05	0.764165	0.000579238	0.0548544	-0.000334782	0.316388	0.000550394	0.141423	-0.000269123	0.45549	1	0.857189
51381	PRCP	-0.365304	1.18994e-210	0.00214698	0.189305	0.0077698	0	-0.131092	0	-9.62529e-05	0.000211333	-0.000230714	0.000119332	0.000336415	0.00307977	0.000605586	7.90053e-05	0.000964603	8.46931e-06	0.000249667	0.439807	0.0018216	2.32011e-09	-0.000177625	0.595887	-0.000977869	0.00833227	-0.000984517	0.00686251	1	0.857189
44199	MDH1	0.0817343	2.19691e-08	0.00266394	0.189378	-0.000266945	0.286589	-0.0661151	2.07486e-59	0.000464248	2.05422e-49	-0.000333321	4.2024e-06	0.000897657	7.23263e-11	0.00060066	0.00127255	-0.000675755	0.0115747	0.000869336	0.0251226	0.000826869	0.0257821	0.000576484	0.158377	-2.37381e-05	0.958498	0.00074151	0.0953822	1	0.857189
44300	GSTT2B	-0.522699	6.32869e-10	0.0154357	0.189423	0.000148996	0.918161	0.0303124	0.197512	0.00263904	9.04961e-48	0.00297836	1.05576e-12	-0.00405303	3.48088e-07	-0.00317633	0.00310506	0.00149395	0.335068	0.00475045	0.0347508	0.00561771	0.00880479	0.00177123	0.454624	0.000272979	0.917887	-0.000133532	0.95859	1	0.857189
50999	COL9A1	-0.498076	1.95866e-197	0.00302654	0.189519	0.00993263	2.37962e-265	-0.0311431	1.62389e-11	-0.000753528	3.98319e-93	0.000897144	1.73679e-26	-0.000922169	7.44117e-09	-0.000871388	5.50245e-05	-0.000818811	0.00740786	0.000527762	0.245844	-0.00209812	1.01023e-06	-7.74084e-05	0.869621	0.000706946	0.176416	0.000910515	0.075829	1	0.857189
43232	OPLAH	0.120713	9.47842e-07	0.00449057	0.189622	-0.000379911	0.368271	-0.115456	1.60184e-63	-0.000375316	1.29734e-12	0.000443591	0.000294246	0.000710948	0.0022032	0.000564026	0.0720506	-0.00211067	2.85321e-06	-9.04737e-05	0.890108	-0.00067763	0.277836	-0.000388358	0.573468	-8.55558e-05	0.91186	-0.000417992	0.576703	1	0.857189
51454	XG	-1.05459	0	-0.00212817	0.190155	0.0133666	0	0.566054	0	0.000134664	1.83946e-07	-9.99255e-05	0.0933988	0.00113355	1.04105e-23	0.000553439	0.000280315	-0.00155651	4.55154e-13	0.000524413	0.102528	3.66719e-06	0.990346	-0.000626273	0.0598823	-0.000456305	0.215178	0.00141848	8.80179e-05	1	0.857189
43153	NAGK	-0.0653548	0.00148354	0.00374543	0.190291	0.00302938	9.00332e-18	-0.154201	1.19822e-158	4.06371e-05	0.357194	0.000199947	0.0505545	0.000183801	0.343016	0.000675472	0.0098549	0.000214997	0.567938	0.000979286	0.0731541	0.000330996	0.52534	0.000196775	0.732587	-0.000293713	0.649172	0.000269769	0.666077	1	0.857189
43120	TLR1	-0.146041	1.53005e-54	0.00171003	0.190434	0.00248772	8.2721e-54	0.0267572	1.27882e-24	0.000608735	2.40008e-199	-0.000660232	1.7683e-45	0.00100641	5.9701e-30	-0.000531512	8.52925e-06	-0.00113766	3.77641e-11	0.000721676	0.00365659	0.000596738	0.0122758	-0.000190736	0.468034	-0.000725569	0.0134674	-0.00050205	0.0795917	1	0.857189
44409	TPK1	-0.1475	4.80537e-50	0.00179867	0.191408	0.0028724	6.2099e-64	-0.0210472	2.20723e-14	-0.000117191	3.67692e-08	0.00030557	4.99921e-10	0.000284232	0.00232132	-9.46988e-05	0.451236	-0.000399441	0.0278053	0.000268503	0.312992	0.000251799	0.315662	-7.17834e-05	0.795917	0.000640487	0.0387784	0.0010074	0.000839069	1	0.857189
51207	CRELD2	-0.2142	2.38037e-30	-0.00340351	0.191565	0.00476733	6.61709e-50	-0.0753906	3.46418e-47	-0.000318123	1.71899e-14	-0.000322937	0.000691632	0.002097	2.87574e-31	0.00164558	1.48203e-11	-0.00134743	9.51918e-05	0.000787065	0.128207	0.00124564	0.0104743	3.41556e-05	0.9491	0.000702756	0.234658	0.00169141	0.00354098	1	0.857189
51228	CPXM1	-0.324044	1.40927e-39	0.00447776	0.191963	0.00563127	1.33237e-40	0.0581035	2.72963e-17	-0.000336788	6.04337e-10	0.000516564	3.86048e-05	0.000660735	0.00543036	0.00183603	9.97297e-09	0.00100008	0.0276031	0.000554215	0.415363	0.000642249	0.3139	-0.00201124	0.00416948	0.00181626	0.019444	0.000405465	0.594553	1	0.857189
44329	LDLRAP1	0.131252	0.000165405	0.00631881	0.192001	-0.00126301	0.0345699	-0.132983	9.26372e-43	-0.000126157	0.0914741	-0.000433226	0.0119001	0.00163684	5.95177e-07	0.000846806	0.055955	-0.00262094	4.11295e-05	0.00138261	0.135914	0.000695024	0.431982	-0.000209782	0.829773	0.00108645	0.319059	0.00174084	0.100635	1	0.857189
50861	GP1BA	0.0982497	3.34116e-17	-0.00211781	0.192066	-0.00139874	2.51106e-12	-0.0176138	6.03295e-08	-0.000409496	1.13396e-56	0.000550985	2.32459e-20	0.000674488	2.1668e-09	0.000104862	0.490847	-0.00103188	1.59689e-06	-0.000661801	0.0384764	0.000296739	0.327527	-0.00102658	0.00200313	-2.66551e-05	0.942204	0.000834565	0.0207422	1	0.857189
43120	EDNRB	0.0606287	0.000164924	-0.00292112	0.192463	-8.31034e-05	0.763371	0.00992647	0.0267218	-0.000218388	2.46099e-10	8.29468e-05	0.299545	-2.79518e-05	0.853903	8.8946e-05	0.664183	-0.00065748	0.0259163	0.000133821	0.75347	-0.000827869	0.0429232	-0.000125491	0.780839	0.000351347	0.48559	-0.00085065	0.0834693	1	0.857189
43232	SEC31A	-0.049424	0.0715742	0.00496114	0.193337	0.000290631	0.536701	-0.0406521	1.00776e-07	-0.000140225	0.0173187	-0.000323314	0.0178551	0.00125536	1.22381e-06	0.000571707	0.101713	-0.00294197	4.73362e-09	0.000653596	0.370288	0.000943907	0.174832	-0.000124078	0.871744	0.00125694	0.144373	0.000865279	0.299637	1	0.857189
49867	FCRLB	-0.335416	5.70945e-54	0.00392906	0.193368	0.00937211	1.12221e-139	-0.200438	2.09479e-238	-0.000358646	7.06036e-14	-0.000809405	1.99863e-13	0.000512099	0.0141424	0.00176684	3.11588e-10	-0.000515236	0.198013	0.000495028	0.404462	-0.00020949	0.70854	0.000267305	0.664995	0.00152385	0.0262394	0.000414424	0.535809	1	0.857189
42972	LRIG3	-0.230838	7.40979e-117	-0.00181381	0.193485	0.00471132	3.57506e-164	-0.031461	1.73583e-29	-0.000159854	1.02761e-13	5.48535e-05	0.270387	0.000137367	0.145941	0.000204342	0.108911	-0.000770752	2.72546e-05	-0.000780865	0.00319663	0.000204947	0.420348	-0.000681595	0.0150885	2.56222e-05	0.934901	-0.000143076	0.639734	1	0.857189
50836	SEMA4C	-0.375167	0	0.00178933	0.193767	0.00635691	7.97398e-304	0.0469271	1.02211e-64	6.65176e-05	0.00232679	0.000117871	0.0188745	9.79672e-05	0.303701	-0.000227896	0.0758008	-0.000721324	7.67555e-05	0.000494708	0.0749111	-0.000245186	0.337355	0.000266891	0.345265	0.000322805	0.301744	-0.000187303	0.540623	1	0.857189
51082	INHBC	-0.566181	6.22001e-271	-0.00289619	0.193819	0.00987928	2.12169e-280	-0.0643572	5.54973e-47	0.000465176	2.09434e-39	-0.00129389	4.29873e-57	0.00248244	2.13488e-58	0.000288718	0.164525	0.00173314	4.2627e-09	-0.00060072	0.173539	0.00196176	2.28643e-06	0.00121497	0.00787126	-0.001988	8.60536e-05	0.000513403	0.300496	1	0.857189
51076	SDC4	0.0732956	9.68257e-06	0.0029969	0.19419	-0.00161999	1.19291e-08	-0.00597288	0.196493	0.000382248	2.85162e-25	-7.84711e-05	0.352559	0.000685505	1.82666e-05	0.000279515	0.197233	-0.000189566	0.535171	6.40697e-05	0.888596	0.000311905	0.469262	-0.000768722	0.104405	-0.000423511	0.418334	0.000133612	0.795222	1	0.857189
50593	CD63	-0.176586	7.64727e-22	0.00332472	0.194195	0.00366238	3.64516e-31	-0.0864019	1.68033e-63	0.000456926	3.14445e-29	-0.000439461	2.3445e-06	0.00198881	2.1124e-29	0.0005055	0.0349445	-0.000635225	0.0608511	-2.03027e-05	0.967818	0.00102794	0.0313888	-0.000539863	0.30224	0.000277936	0.632301	0.000159069	0.780516	1	0.857189
51076	LEP	-1.77122	0	-0.00632642	0.194595	0.0166557	3.63691e-168	1.37469	0	0.00099694	1.30975e-37	0.000423051	0.0176941	0.00500547	1.5992e-49	0.00482805	5.90732e-26	0.0026964	2.98801e-05	0.00073902	0.444437	0.00495776	5.22751e-08	-0.000623942	0.532755	-0.00190042	0.0856563	-0.000238106	0.826729	1	0.857189
50053	SOD1	0.128063	4.09565e-13	0.00319101	0.194776	-0.000316289	0.296097	-0.149317	8.4116e-200	0.0005201	3.45834e-40	-0.000503255	2.42491e-08	0.00100531	3.84525e-09	0.000439196	0.0567041	-0.000367956	0.258495	0.00116159	0.0173044	0.000962724	0.0356524	0.000929587	0.0648785	-0.000823092	0.139544	0.000846956	0.122454	1	0.857189
51076	NPTXR	-0.028349	0.0229951	-0.00225208	0.19492	7.73373e-05	0.717635	0.0896094	3.15269e-145	-0.000263233	2.02848e-21	-0.000787645	3.04969e-35	0.000287256	0.0170446	-0.00041551	0.0108785	0.000315211	0.170707	-0.00020067	0.559967	0.000647259	0.0460274	-0.000840774	0.0182966	-0.00147043	0.000189289	-0.000208012	0.591401	1	0.857189
49871	SLIT2	-0.106485	1.00044e-08	-0.00335628	0.194929	0.00208955	5.52219e-11	0.00942102	0.0692442	-3.39799e-05	0.407439	-0.000133762	0.155791	0.000296191	0.0976599	-0.000281725	0.24248	-5.4036e-05	0.874818	0.000489939	0.334739	0.000570487	0.236432	-0.000346646	0.512581	0.000291723	0.619652	3.80215e-05	0.947399	1	0.857189
51198	CHL1	-0.180976	2.42326e-60	0.00199194	0.195147	0.00332234	7.27091e-69	0.0369701	3.47804e-33	1.24426e-05	0.610256	0.000444208	2.94257e-15	-6.80033e-06	0.949097	-0.000362101	0.0120658	0.000113486	0.577095	0.00023241	0.44367	0.00105412	0.000239214	0.000280914	0.372035	-0.00027436	0.431187	0.000419714	0.219403	1	0.857189
50836	SIRT2	0.194691	7.82156e-10	0.00570957	0.195591	-0.00331621	1.0162e-09	-0.0184731	0.0366131	0.000354912	3.96804e-07	-0.000788111	9.60812e-07	0.0019885	7.29031e-11	0.00112954	0.00601993	-0.00215038	0.000233811	0.00174931	0.0493444	0.000885243	0.279635	0.000986935	0.276014	0.00130169	0.193692	0.000802402	0.413285	1	0.857189
51196	PROC	-0.228133	4.70715e-135	-0.00165866	0.195777	0.00337258	5.02427e-101	0.060673	7.22431e-123	-0.000168589	1.26239e-16	-0.000206397	1.08743e-05	0.000174069	0.0500357	-0.000145113	0.227745	-0.000453692	0.00750826	-0.000109586	0.664882	-0.000504131	0.0350978	-0.000151323	0.564082	-0.000876694	0.00254323	-7.46251e-05	0.793423	1	0.857189
51082	SPINK5	0.316056	1.43415e-152	-0.00215248	0.196765	-0.00395057	2.96603e-82	-0.134342	0	-0.000608096	3.6528e-116	0.000134695	0.0265186	0.00030076	0.00899353	0.000487974	0.00168874	0.00157145	1.09397e-12	0.00138175	2.86584e-05	0.000114101	0.713261	0.000169358	0.620478	-0.000581479	0.124692	0.000730297	0.0490013	1	0.857189
43195	CIT	-0.00247579	0.881806	0.00298721	0.196781	0.00173611	1.22249e-09	-0.0866134	8.61949e-78	2.5166e-05	0.480926	-0.000145036	0.0781326	0.00041081	0.0087557	0.000397805	0.0602394	0.000184213	0.545806	0.000909341	0.0386942	0.000118944	0.778428	2.07064e-05	0.964514	-0.00119819	0.0212245	-3.02078e-05	0.952518	1	0.857189
44220	KIR2DS4	0.810728	1.51996e-40	-0.0109004	0.196937	0.00245525	0.0184806	-0.00097398	0.954059	0.00147824	8.77505e-30	0.000292944	0.331592	-0.00773615	1.52607e-41	0.000758834	0.325215	-0.000884719	0.427007	0.00228678	0.158169	0.00396111	0.0102086	-0.00775814	5.44732e-06	-0.00357835	0.0603032	0.000210598	0.909273	1	0.857189
43120	PER3	0.64869	2.2893e-52	0.0076395	0.197279	-0.00558058	2.09399e-14	-0.382593	3.24422e-226	-0.000213847	0.0190327	0.000268427	0.204115	0.00172592	1.70449e-05	0.000300604	0.578887	-0.00170198	0.0291742	-0.0022881	0.0422302	0.000260131	0.809843	0.00024579	0.836687	0.00160221	0.229021	-0.00184138	0.156391	1	0.857189
44329	AKT2	0.0785291	0.0804648	0.00803852	0.198001	-0.00195186	0.0113088	-0.0166018	0.184004	-0.000324938	0.000748544	-0.000218323	0.325582	0.00227428	7.44214e-08	0.000866056	0.129486	-0.00488621	3.04589e-09	0.00102731	0.39016	0.000661661	0.561783	-0.00100124	0.426138	0.00165925	0.237919	0.000979143	0.47387	1	0.857189
50999	VASH1	0.164075	1.82879e-08	0.0052325	0.198043	-0.00173965	0.000503001	0.0028929	0.722469	-7.08603e-05	0.273706	-0.000585694	7.90013e-05	0.00125267	8.34401e-06	0.00161599	2.19321e-05	-0.001469	0.0064057	0.000830496	0.300072	0.000708002	0.349069	-0.000455094	0.583972	0.00166166	0.0713735	-4.41496e-05	0.961038	1	0.857189
43120	ESR1	0.183217	7.72237e-19	-0.00370255	0.198216	-0.0016938	1.76608e-06	0.00988513	0.0857194	-0.00024041	5.72777e-08	0.000140722	0.170446	1.53225e-05	0.937336	8.82837e-05	0.737159	-0.000874953	0.0209606	-0.000630629	0.249025	-0.00123207	0.0189473	-0.000811355	0.161206	0.00065541	0.310988	-0.00155241	0.0138854	1	0.857189
50116	JUN	-0.0697884	0.000106548	-0.00322464	0.198482	0.00255297	1.411e-16	-0.0163023	0.00117676	-0.000274088	6.80164e-12	0.00022801	0.0129158	0.000168435	0.332213	0.000329346	0.158971	-0.000282553	0.394931	-0.000543491	0.269127	-0.00100882	0.030377	-1.24364e-05	0.980657	0.00056838	0.31826	-0.000476953	0.391421	1	0.857189
51082	TREML2	0.0408501	0.0007415	-0.00216547	0.19913	-0.00141817	8.4959e-12	0.0757069	1.24092e-110	-0.000919595	1.34073e-255	0.000497462	5.53027e-16	0.000733138	3.06753e-10	-0.000166136	0.290448	-0.000558513	0.0123486	-0.000108099	0.746185	0.000910427	0.00374171	-0.000827123	0.0167952	0.00024873	0.516081	0.000133886	0.721198	1	0.857189
51228	C4BPB	-0.526596	1.76273e-292	0.00256372	0.199267	0.0078367	1.56359e-221	0.183962	0	0.000381685	2.02725e-33	-0.000221525	0.00242276	0.00010117	0.464459	-0.000455702	0.0145042	-0.00191857	3.87689e-13	-0.00125122	0.00158054	0.000857498	0.0208701	-0.000997587	0.014613	-0.000180049	0.69058	0.00045875	0.300795	1	0.857189
50836	IL12A_IL12B	-0.778741	1.81326e-163	-0.00508799	0.199773	0.0118081	1.96232e-128	0.290607	8.60801e-289	-0.00140309	1.61035e-109	-0.000431492	0.00285941	0.000810845	0.00313924	0.000894942	0.0155447	0.00184983	0.000433473	0.000758714	0.34323	0.00275997	0.000178848	0.00175426	0.0313526	0.000159807	0.859195	1.22119e-05	0.988956	1	0.857189
50836	RTBDN	-0.421323	0	-0.00190311	0.200068	0.00696308	0	0.052045	2.67108e-68	-0.000201447	1.26824e-17	-0.000645105	1.10915e-32	0.000314746	0.00218892	0.000367349	0.00797015	0.000767933	9.5077e-05	9.7983e-05	0.743645	-0.000114938	0.676712	-0.000673688	0.0272022	-3.23242e-05	0.923625	-0.00025793	0.434716	1	0.857189
43120	BLNK	0.0325243	0.0210107	-0.00251513	0.200076	0.000109581	0.650349	-0.0258191	4.75072e-11	0.000405937	4.45905e-41	0.000500881	8.6263e-13	0.000587666	9.87144e-06	0.0013638	3.00247e-14	0.000597267	0.0208644	-0.000549698	0.14074	6.64695e-05	0.852759	-0.000605169	0.125527	8.38035e-05	0.849373	0.000527252	0.220571	1	0.857189
51027	TFF3	-0.511927	3.96761e-213	-0.00291819	0.200582	0.00933099	3.38402e-240	0.12226	5.76214e-157	-0.000202474	2.29301e-08	2.0492e-05	0.805999	0.00112984	8.49371e-13	0.000182958	0.392515	0.000558175	0.0642394	-0.000911278	0.0429256	-0.00051064	0.2301	-0.000322588	0.489388	0.000418907	0.418073	0.000202982	0.688933	1	0.857189
44409	CRYBB1	-0.0666318	0.00434056	0.00415388	0.200849	0.00225761	1.76919e-08	-0.0435963	1.97267e-11	8.30575e-06	0.868579	0.000490585	2.29929e-05	0.000840108	0.000135343	0.00153457	2.27928e-07	-0.00211405	7.9753e-07	0.000922818	0.141513	0.000724308	0.221063	0.000764407	0.242945	0.00109232	0.135116	0.00106858	0.133116	1	0.857189
42978	CRYM	0.241834	2.44829e-19	0.0047854	0.20092	-0.00214619	3.24252e-06	-0.0084913	0.25643	9.31414e-05	0.10638	-0.00104738	3.84546e-15	0.000358371	0.15749	0.000839117	0.0139556	0.000174398	0.72379	0.000152466	0.829755	0.000661514	0.333848	0.00068133	0.365874	0.000662743	0.430226	-0.000594056	0.469504	1	0.857189
44300	MORC3	0.0311142	0.00176722	-0.0017706	0.200955	-0.000248367	0.145643	0.00144068	0.602827	-5.3222e-05	0.0127523	1.47809e-05	0.763869	0.00011489	0.219731	6.99741e-05	0.579938	-0.000141556	0.437766	0.000435458	0.10014	-0.000314853	0.212279	0.00023467	0.399998	-0.000920513	0.00314372	-0.0005219	0.0847023	1	0.857189
50865	FCGR2A	-0.521311	3.36239e-132	-0.00377835	0.201817	0.00631696	3.72576e-67	0.07675	2.79374e-38	0.00147333	6.39088e-214	-0.000384511	0.00038511	1.5653e-06	0.993907	0.00406395	1.98058e-48	0.000909578	0.0204057	0.000432704	0.457816	0.00147577	0.00753885	0.00028847	0.633512	0.00186926	0.00528572	-0.00101969	0.121212	1	0.857189
51208	MET	-0.0600697	8.93272e-17	0.00128536	0.201916	0.000185461	0.134127	0.0925138	0	-0.000241292	1.91556e-51	0.000225806	9.02641e-10	-0.000466992	2.23078e-11	-0.000110584	0.2405	-0.000847237	2.00475e-10	-0.000459819	0.0206576	-0.000228318	0.223247	-0.000247525	0.23006	-0.000306605	0.17932	-0.000187927	0.400293	1	0.857189
44201	GPD1	-0.194369	1.6857e-21	0.00361128	0.202708	0.00455481	1.17108e-38	-0.00496681	0.381485	-0.000109719	0.0120419	-0.000733017	3.83612e-13	0.00207918	2.48215e-27	0.000724808	0.00522483	0.000575098	0.124223	0.00145724	0.00729511	0.000871706	0.09291	0.00053512	0.350313	0.00116857	0.0675525	-0.000864468	0.163932	1	0.857189
51518	PPCDC	0.0843422	7.58239e-07	0.00302565	0.203081	-0.000327391	0.262951	-0.0709683	3.70804e-50	0.000431746	2.52457e-30	-0.00161883	1.7206e-77	0.00190187	7.04357e-31	0.000651832	0.00333626	-0.000898012	0.0043289	0.00063779	0.175692	0.000679199	0.124879	0.000640372	0.188393	-0.000178831	0.739934	0.000843885	0.110845	1	0.857189
42948	GP1BB	-0.140886	5.49773e-09	0.00428325	0.203151	0.00331109	1.38695e-15	-0.0529993	3.33426e-15	-0.000158196	0.00218463	-6.91795e-05	0.561199	0.00148271	6.19463e-11	0.000365203	0.233817	-0.0014037	0.00155926	0.000516293	0.417455	0.0011291	0.0655991	-0.000625688	0.354706	0.000358104	0.635439	0.0016893	0.0218569	1	0.857189
51546	TGFB1	-0.37227	7.84579e-158	0.00245729	0.203825	0.00714241	1.23378e-196	-0.0173697	7.15848e-06	-0.000377281	1.41043e-34	0.000313911	8.44606e-06	0.00071191	9.96329e-08	0.00167488	1.89164e-20	-0.000304467	0.233825	-3.41082e-05	0.929016	0.000996508	0.00551983	-0.000484376	0.220396	0.000509458	0.244755	0.00081102	0.0584072	1	0.857189
51518	SUMF2	-0.268552	1.32273e-45	-0.0033511	0.204104	0.00493252	5.06346e-52	-0.0835478	3.57088e-56	-0.000593053	1.71531e-45	-0.000237485	0.0136409	0.000737381	5.39604e-05	0.00155556	2.81627e-10	-0.000515929	0.139755	0.000766249	0.142768	0.000538278	0.273244	-0.000793631	0.141967	0.001524	0.0108274	0.000814351	0.165732	1	0.857189
44220	CEACAM16	-0.43888	1.02922e-50	-0.00515803	0.204973	0.00403913	8.78841e-16	0.324479	0	0.000715425	4.78484e-30	0.00025024	0.0851252	0.00085664	0.00189195	-0.000808991	0.0294645	-0.00480524	3.49104e-19	0.00196198	0.0119551	0.0025932	0.000481584	0.000100012	0.903144	-0.000701345	0.444659	0.00301685	0.000702583	1	0.857189
50140	BOC	0.205314	2.58386e-130	-0.00148712	0.205263	-0.0030122	4.87402e-96	-0.0670672	2.70186e-177	0.000412529	1.15215e-107	-0.000253445	3.41292e-09	0.000899825	1.85772e-28	-0.000683968	4.5798e-10	-0.000463277	0.00288634	0.000147227	0.522509	-0.000622213	0.00438204	6.29377e-05	0.793014	-0.00039915	0.133453	-0.000201699	0.439515	1	0.857189
44220	SLC9A3R2	0.048649	0.00685904	-0.00316876	0.205341	0.00180235	5.28094e-09	-0.129315	5.54088e-146	0.000158764	3.90455e-05	-0.00031104	0.000500585	0.000607745	0.000337444	0.000537526	0.0186294	-0.001105	0.000809639	-0.00069831	0.145654	-1.34538e-06	0.99765	1.04711e-05	0.983467	-0.000420341	0.456221	0.000963318	0.0784197	1	0.857189
44220	TSPAN8	-0.59459	3.55744e-63	-0.00621755	0.206336	0.0150391	1.3101e-134	-0.44556	0	-9.53588e-05	0.208971	-2.03132e-05	0.907973	-0.00269143	6.99681e-16	-0.00323667	5.9003e-13	-0.00204112	0.00165326	0.000176136	0.851944	-0.00169215	0.0595497	0.0031641	0.00145195	-0.00224323	0.0431748	-0.000760761	0.47969	1	0.857189
51082	B4GAT1	-0.248233	1.38951e-169	-0.0015667	0.206762	0.00337861	6.78527e-108	0.106185	0	-3.67493e-05	0.062142	-0.000230881	3.2292e-07	6.57671e-05	0.442709	0.000438165	0.00015137	-0.000187635	0.253298	-0.000199324	0.417315	5.69774e-05	0.805227	-0.000614146	0.0158271	-0.00045779	0.104308	-0.000261816	0.342939	1	0.857189
42978	OMP	0.0783998	6.79423e-06	-0.00306066	0.206804	-0.000318483	0.286345	0.00358103	0.460123	4.45907e-05	0.232865	-1.74193e-05	0.840062	6.57184e-05	0.689111	-8.47025e-05	0.701722	0.000390281	0.222261	-0.000340751	0.458312	0.000119936	0.786846	0.000324321	0.506513	-0.00157681	0.00377641	-0.000310096	0.560106	1	0.857189
42497	TP53I3	-0.0783862	4.89597e-05	0.0033861	0.206865	0.00277087	6.04163e-17	-0.0975562	1.69576e-73	0.000320911	9.19876e-15	-0.000487519	3.039e-07	0.000440254	0.0152323	0.000414587	0.0923853	-0.000284189	0.420476	0.00119854	0.0220256	0.00138789	0.00451549	0.000200594	0.710842	0.000247216	0.683001	0.000379657	0.515971	1	0.857189
42978	RRP15	0.0968553	0.00298342	-0.00572913	0.206913	-0.00196949	0.000429626	0.0126137	0.164651	-0.00016672	0.017204	-5.50565e-05	0.733342	2.4771e-05	0.935809	0.000530528	0.200115	-0.000855851	0.152853	8.27611e-05	0.923358	0.00111866	0.177962	-0.00259481	0.00453314	-0.000810598	0.426466	0.000370054	0.710351	1	0.857189
44300	GCC1	-0.124193	0.00132576	0.00678567	0.207427	0.00205367	0.00196987	-0.0685307	1.94926e-10	0.000241135	0.00370104	-0.00106501	2.59635e-08	0.00241563	3.22941e-11	0.00116574	0.0177058	-0.00362315	3.25539e-07	0.00108382	0.292509	0.00219838	0.0250803	-0.000605428	0.57649	0.000397292	0.742997	0.000831087	0.480068	1	0.857189
42978	ZPR1	0.369667	9.41751e-28	0.00593421	0.207594	-0.00305102	1.45678e-07	0.0432943	4.28018e-06	-0.000466618	1.30787e-10	2.81689e-05	0.866559	-0.000523832	0.10063	0.00119414	0.00543738	-0.00102018	0.100458	-0.0015173	0.0890842	-0.000211917	0.805683	0.000148801	0.875308	0.000978475	0.354764	-0.00102391	0.321887	1	0.857189
42978	DCUN1D1	0.269826	1.02236e-23	0.00471113	0.207599	-0.00196731	1.9484e-05	0.035391	2.20548e-06	-0.00044448	1.26153e-14	0.000264242	0.0471024	-0.000539544	0.0331692	0.000322922	0.343668	-0.00084177	0.0877785	6.3752e-05	0.928298	-0.00256598	0.000175704	-2.19251e-05	0.976766	-0.00250932	0.00279788	0.000235595	0.774036	1	0.857189
43434	SYAP1	-0.00971124	0.63539	0.00358977	0.207644	0.00121518	0.000543604	0.0297071	1.85954e-07	-0.000125248	0.0043124	-0.000367943	0.000278153	0.000984074	3.29273e-07	0.000686477	0.00860263	-0.0020563	4.09311e-08	0.000437091	0.425003	0.000455049	0.380941	0.00057487	0.315957	0.000367761	0.567626	0.000939116	0.130785	1	0.857189
51076	PDCD6	-0.286556	1.67129e-30	0.00437645	0.208033	0.00138814	0.00117799	0.0676142	2.87329e-22	0.000457423	1.51421e-16	-0.000655132	2.56011e-07	0.00106711	9.4429e-06	0.000501699	0.124311	6.13339e-05	0.894005	0.000853554	0.215253	-9.91216e-05	0.878619	0.00364473	3.18615e-07	0.0010583	0.179286	-0.00019297	0.803429	1	0.857189
50836	DDAH1	-0.41618	2.51677e-146	-0.00282432	0.208173	0.00842204	1.97673e-202	-0.0382958	1.66303e-17	-0.000353787	2.98669e-23	-0.000459481	1.96009e-08	0.000787978	3.864e-07	4.66832e-05	0.823394	-0.000232332	0.434469	0.000760985	0.0927549	6.72244e-05	0.871773	8.77964e-05	0.84891	0.00026421	0.604009	7.87106e-05	0.874635	1	0.857189
49871	PLIN1	-0.426696	1.36225e-226	-0.00231623	0.208352	0.00724694	2.8576e-222	0.097967	1.64869e-154	4.09435e-05	0.160336	-0.000109185	0.103196	0.00101386	1.56273e-15	0.00027046	0.114519	-0.000642555	0.00841805	0.000615779	0.088157	0.000205943	0.547742	-0.000141401	0.707142	0.000149407	0.720686	0.00123348	0.0026105	1	0.857189
50999	NTF3	0.0493539	9.73317e-05	-0.00222055	0.208581	-0.00122768	1.58955e-08	0.0468322	6.32716e-40	0.000141886	4.53875e-07	-0.000225367	0.000471059	0.000266299	0.0291871	-0.000403645	0.0146602	-0.00142257	1.22594e-09	0.000653824	0.0603706	-0.000198852	0.544883	0.000164596	0.648444	-0.00135634	0.000703994	-0.000519459	0.185777	1	0.857189
50999	PSIP1	-0.0899364	0.000123457	0.00409814	0.20963	0.00417807	2.64476e-25	-0.12383	1.47466e-79	0.00034356	4.02772e-11	-0.000648317	5.40628e-08	0.00150534	2.67413e-11	0.000337952	0.269286	6.57584e-05	0.87928	0.00125395	0.0515122	0.000236265	0.697362	0.00081887	0.220123	-0.00114266	0.12281	-0.00194232	0.00748309	1	0.857189
50678	TNFRSF10B	-0.928182	0	-0.00257211	0.2097	0.0177886	0	-0.0691489	1.974e-63	-0.000445064	2.13411e-42	-9.25998e-05	0.214321	0.00109213	1.16755e-14	0.000726303	0.00015448	0.0020544	3.7477e-14	0.000194622	0.629328	0.000754775	0.0484244	0.000784904	0.0611476	0.000819909	0.0780356	0.00101019	0.027073	1	0.857189
44329	SATB1	0.048941	4.50302e-06	-0.00186025	0.209706	-0.000342937	0.0609296	0.00884758	0.00287153	-4.99083e-05	0.0292303	1.45388e-05	0.782811	-2.15147e-05	0.830276	0.000205298	0.130192	0.000196291	0.315791	-0.000193155	0.496289	-0.000291281	0.282149	0.000423825	0.156051	-0.00131042	8.69088e-05	-0.000411875	0.204598	1	0.857189
44220	PTPRK	-0.106695	2.62853e-42	0.0013635	0.209831	0.00212491	2.29697e-56	0.0119994	3.5173e-08	0.000175508	1.355e-25	4.90257e-05	0.206792	0.000171031	0.0202595	0.000117953	0.234786	0.000544207	0.000147108	-2.67982e-05	0.897758	8.3031e-05	0.675689	0.000156836	0.475088	-0.000225056	0.358627	-0.000144179	0.544418	1	0.857189
50836	OMG	-0.128588	1.2787e-07	-0.00425323	0.209874	0.000807859	0.0529657	0.129599	8.41522e-81	0.000312942	6.07845e-09	-0.000721541	5.41966e-09	-0.000746232	0.00147201	0.000292709	0.354565	-9.00002e-05	0.841248	0.00128933	0.0595317	-0.000147812	0.814374	0.000596864	0.391548	-0.00201471	0.00888833	-0.00278113	0.000226208	1	0.857189
49871	CARHSP1	-0.000545797	0.976825	0.00327843	0.210595	0.0025545	2.28855e-15	-0.187018	4.23168e-275	0.000229416	3.20749e-08	-0.000420603	1.02022e-05	0.0002772	0.125326	-0.000304245	0.21198	0.000773237	0.0258054	0.00154996	0.00254949	0.000283947	0.560092	0.000921961	0.0850453	-0.00187868	0.00157462	0.000430621	0.459998	1	0.857189
43434	PINLYP	0.596792	1.77707e-132	-0.00422591	0.210875	-0.0114328	1.9953e-164	-0.0180259	0.00762446	0.000104934	0.0436833	-0.00065663	4.48038e-08	0.000720191	0.00162117	0.00046181	0.135986	0.00323143	3.55029e-13	0.00159115	0.0143071	0.00245219	6.83185e-05	-0.00227645	0.000810375	-0.000206964	0.786159	0.00354052	1.55288e-06	1	0.857189
44201	SDCCAG8	0.264846	1.30477e-10	0.00716305	0.210896	-0.00394807	2.3344e-08	-0.08456	1.64081e-13	0.000238933	0.00678125	-0.00122601	1.81052e-09	0.00162781	2.66174e-05	0.00033262	0.525672	-0.00400052	1.19577e-07	0.00099111	0.366218	0.00256396	0.0144048	0.000548039	0.635771	0.000169291	0.895676	0.00015388	0.902355	1	0.857189
43195	MN1	0.119778	7.70106e-09	0.00360247	0.211314	-0.00101507	0.00432119	0.0243141	2.4794e-05	-0.000127326	0.00419254	4.75451e-05	0.642845	2.63325e-05	0.892665	0.000147223	0.576558	0.000340383	0.370115	0.000228823	0.676126	0.000643346	0.221697	0.000275247	0.634869	-2.43064e-05	0.970061	1.6194e-05	0.97955	1	0.857189
50997	GP6	0.0192893	0.539211	0.00546673	0.211536	-0.00120574	0.025197	0.0296722	0.000714812	-0.000174197	0.012123	-0.00031068	0.0510955	0.00113255	0.000177979	0.00142437	0.00048168	-0.000994655	0.0859004	0.00105206	0.224417	0.000424805	0.602259	-0.000421807	0.638234	0.00101624	0.306506	0.00086922	0.372163	1	0.857189
43434	MFAP4	-0.549853	0	0.00199978	0.211967	0.00917286	0	0.0881932	2.4984e-165	0.000382922	3.6635e-54	0.000144617	0.0110717	-0.000535036	7.96469e-07	-0.000625334	2.08504e-05	-0.000331361	0.115853	-9.30644e-05	0.762625	-0.000181358	0.534657	-0.000170433	0.597049	-0.000617589	0.0878837	-0.000218655	0.531593	1	0.857189
44448	GPI	0.0128465	0.450726	0.00295485	0.212093	0.00081852	0.00508769	-0.0309461	6.51044e-11	1.26735e-05	0.72903	-0.000361156	1.91518e-05	0.00105273	5.47421e-11	0.000789123	0.000274035	-0.00104465	0.000817563	0.000595107	0.189576	0.000848508	0.0497038	0.000339638	0.476567	0.000700338	0.188639	0.000544129	0.294231	1	0.857189
50116	IL5	0.751997	3.77843e-50	0.00874344	0.213259	-0.0101784	6.4836e-32	0.200939	3.77107e-46	-0.000162621	0.14604	0.000272141	0.289472	-0.000216811	0.655908	-0.000287996	0.660158	0.00149387	0.108365	0.00152111	0.269556	-0.000475849	0.715423	0.000345595	0.80993	-0.00398565	0.0124798	0.000608168	0.696449	1	0.857189
44300	KLRK1	-0.119985	2.94346e-13	-0.00283909	0.214518	0.00156947	2.62228e-08	0.000504939	0.912098	-0.000274164	8.24377e-15	9.32644e-05	0.251233	0.000710593	4.34604e-06	-0.000315397	0.131028	-0.000387571	0.198438	0.000234486	0.592009	0.00140975	0.000723781	0.000677828	0.141158	0.00025538	0.619904	0.000710085	0.155643	1	0.857189
51038	PNLIPRP2	-1.14884	5.57771e-28	0.018099	0.214981	0.00394452	0.0280098	0.0127749	0.662067	0.000887576	0.000132369	0.00819551	4.25651e-53	0.00225013	0.0259223	-0.000969121	0.477284	-0.00630071	0.00111601	0.00500826	0.0835111	-0.00128142	0.638036	-0.00201056	0.50195	0.00421085	0.203257	-0.0095343	0.00331918	1	0.857189
51228	TNFRSF12A	-0.863446	0	-0.00221865	0.214984	0.0168507	0	-0.129082	4.60212e-281	-0.000243956	8.1592e-18	-0.000272713	3.08096e-05	0.000865355	2.8967e-12	0.00057363	0.000593295	0.000123927	0.600579	-0.000564932	0.111302	2.1276e-05	0.94898	0.000311255	0.395082	0.00070805	0.0805794	0.00123577	0.00186352	1	0.857189
51349	CPA2	-0.395163	5.52854e-64	-0.00403897	0.215005	0.00763756	1.08757e-80	-0.00832062	0.202077	-0.000303918	4.07534e-09	0.000279035	0.0191178	0.00157293	3.27752e-12	-0.00166093	5.05987e-08	-0.001292	0.00274863	0.0010185	0.114056	-0.00072675	0.23075	0.000275404	0.679495	-0.000327211	0.657412	-0.000525954	0.46839	1	0.857189
44329	RGCC	0.0715605	0.00831138	0.00466937	0.215376	-0.0013242	0.00440967	-0.0374067	7.083e-07	3.14249e-05	0.589046	-0.000250401	0.0617493	0.0012525	9.13459e-07	0.000307105	0.373044	-0.0031087	4.10563e-10	0.000531695	0.461181	0.000739429	0.28269	-0.000658442	0.38587	0.000561798	0.507912	0.000366682	0.656758	1	0.857189
51356	RILP	0.044445	0.0411323	0.00375517	0.216067	-7.50051e-05	0.840721	-0.06681	4.46709e-28	0.000899721	1.9647e-77	-0.00014671	0.18341	0.000948573	5.72489e-06	0.000185138	0.512998	-0.000548263	0.172407	0.00106354	0.0758669	0.000779922	0.166247	0.00173826	0.0050558	-0.000197559	0.774039	0.000296982	0.658806	1	0.857189
50678	EIF4B	0.0180825	0.379884	0.00354867	0.216225	-3.51564e-05	0.920716	-0.093655	1.55136e-59	-0.000177512	9.92991e-05	-0.000538901	2.42773e-07	0.00079411	6.02949e-05	0.00044687	0.096197	-0.00109598	0.0038997	0.00096629	0.086831	0.000682372	0.202315	0.000598484	0.307642	0.00112101	0.0851432	7.39921e-05	0.907896	1	0.857189
51082	BLVRB	0.0486663	0.0433928	0.00414544	0.216729	0.0029951	4.21246e-13	-0.251311	1.27372e-301	0.000779078	2.52178e-48	-0.000564904	3.78298e-06	0.000907697	8.95301e-05	-0.000305184	0.329123	0.000747998	0.0921891	0.00125138	0.0597099	0.00078139	0.211126	0.00193895	0.00484925	-0.0042737	2.0651e-08	0.0010679	0.152607	1	0.857189
44300	DOK1	-0.00754722	0.876507	0.00834768	0.216735	-0.00218399	0.00875701	-0.0495046	0.000249356	-0.000177258	0.0892213	-0.000383702	0.110114	0.00270457	3.26284e-09	0.000359951	0.559684	-0.00535999	1.76023e-09	0.00197479	0.126603	0.00167029	0.175199	-0.000811133	0.551172	0.00131586	0.387048	0.000154712	0.916606	1	0.857189
43602	RGL2	0.156161	7.63125e-12	0.00391529	0.216947	-0.00120715	0.00203697	0.0214866	0.000709585	-0.000190944	9.24789e-05	-0.00040641	0.000323387	-0.000274122	0.202921	-0.00031544	0.277979	-0.000646531	0.122008	0.000549997	0.365109	-7.89972e-05	0.891774	0.000523974	0.413127	-0.000742042	0.298887	-0.000254742	0.715239	1	0.857189
50678	PHOSPHO1	-0.507707	0	-0.00184831	0.217121	0.0100796	0	-0.128265	0	-0.000151941	1.73342e-10	0.000257915	2.18841e-06	0.000593372	9.2732e-09	0.000325354	0.0202922	-0.000736711	0.000201232	-0.00021493	0.465483	-0.00139008	6.47709e-07	-0.000521743	0.0883429	0.000724763	0.0329381	0.000328908	0.324401	1	0.857189
44329	PCBP2	-0.049863	0.0521714	0.00440526	0.217151	0.00173349	8.30697e-05	-0.0721168	6.09403e-24	-0.000149041	0.00682711	-0.000306932	0.0156178	0.00114083	2.3403e-06	0.000571601	0.0800181	-0.00238148	4.28705e-07	0.000658854	0.33497	6.07767e-05	0.925717	-3.83421e-05	0.95748	0.000733095	0.361645	0.0001218	0.876144	1	0.857189
44448	F10	0.139591	3.13119e-46	-0.00167548	0.217247	-0.00269623	4.16134e-58	0.00786861	0.0037711	-9.1216e-06	0.663711	0.000123807	0.0106025	0.000526341	1.07963e-08	0.000571253	4.3636e-06	8.04013e-05	0.653273	-0.000519832	0.0456871	0.000353569	0.153843	-0.000577476	0.034809	-0.000682862	0.0254001	0.000660192	0.0264721	1	0.857189
51469	VEGFA	-0.542095	1.50571e-147	0.00359326	0.21735	0.0109158	4.33188e-202	0.0180619	0.00195058	-0.000211425	5.05002e-06	-0.000371222	0.000476618	0.00190097	3.9034e-21	0.000759921	0.00513099	-0.000595071	0.122621	-0.000399989	0.486916	0.000740787	0.170157	0.00116943	0.0491115	-0.000627353	0.341857	0.000854396	0.185662	1	0.857189
42820	TRIM26	0.00976769	0.629764	-0.0034673	0.21852	0.000618475	0.075187	-0.00756268	0.179805	-5.72408e-05	0.185765	-7.95001e-05	0.423976	1.92176e-05	0.919166	0.00036118	0.160118	-0.000490284	0.186907	-0.000663548	0.214527	-0.000218905	0.670529	-0.00156303	0.00582616	-0.0013943	0.0278979	-0.000143368	0.816722	1	0.857189
51122	ROBO1	-0.118814	2.68322e-42	0.00149313	0.218787	0.00147636	5.03389e-23	0.0860163	9.31246e-271	0.00022156	1.96578e-30	-0.000199963	6.56472e-06	0.000687643	2.69031e-16	0.000351069	0.00198505	-2.50204e-05	0.876375	0.000747199	0.00192741	0.000434508	0.0553442	0.000539087	0.0305762	0.000206991	0.452423	0.000111879	0.678715	1	0.857189
43120	TSPYL1	0.0274838	0.0594781	0.00249524	0.219259	0.000287227	0.250894	-0.00470942	0.246089	6.16172e-05	0.0487252	-0.000302975	2.90316e-05	0.00072166	1.5612e-07	0.000367003	0.0480832	-0.00063473	0.0176508	0.000204472	0.59644	0.000477357	0.197707	3.46768e-05	0.932392	0.000341911	0.453966	-7.31626e-05	0.869514	1	0.857189
44201	IL22	-0.00741813	0.759571	0.00413552	0.219524	0.00526136	1.22981e-36	-0.366295	0	-0.000916533	1.64153e-69	0.000569912	2.01081e-06	1.43117e-05	0.949939	0.00131605	1.97467e-05	0.0044518	1.37665e-23	0.00142602	0.0271167	0.000747401	0.225314	0.00106044	0.119291	0.000997629	0.189025	0.0012292	0.0957475	1	0.857189
43120	IL12RB2	0.122479	2.02886e-16	0.00254618	0.21967	-0.00141094	3.36154e-08	0.0326454	3.55394e-15	-0.000426343	1.36388e-40	0.000297031	5.98603e-05	-0.000412265	0.00334406	-5.48825e-05	0.772256	-0.000770698	0.00478787	-0.000913424	0.0205544	-0.00157659	3.11218e-05	-0.00109058	0.008994	-0.000753275	0.106249	-0.000147518	0.745699	1	0.857189
50836	NUDT2	0.00556507	0.783692	0.00346349	0.220187	0.000938847	0.00692699	-0.0399941	1.60838e-12	-0.000423846	3.28261e-21	-0.000614962	2.37309e-09	-0.000146618	0.453087	0.000230477	0.381435	-0.00127865	0.000634005	0.000633441	0.266337	-0.000560977	0.284659	0.00057341	0.322977	0.000834888	0.192972	-8.51298e-05	0.892178	1	0.857189
50999	ITM2A	-0.326995	1.36338e-52	-0.00365631	0.220508	0.00636706	3.26448e-67	-0.036388	1.17042e-09	7.89376e-05	0.0967228	0.000541847	6.5471e-07	-0.000173899	0.399366	0.000624442	0.0254705	0.000725914	0.0664807	0.000575595	0.327903	-0.000814828	0.142105	0.000134802	0.825133	0.00100875	0.135941	0.000267105	0.687246	1	0.857189
44329	VGF	-0.140692	2.74113e-37	-0.00187515	0.220727	0.00164738	2.90383e-18	0.0928533	1.15813e-199	-0.000205842	3.14854e-18	-0.000370547	1.02778e-11	0.00037911	0.000254414	-1.77044e-05	0.899417	0.00100116	7.2482e-07	-0.000189924	0.517056	-0.000337888	0.226935	-0.000803071	0.00924036	-0.000750748	0.0294298	-0.000536849	0.109292	1	0.857189
51219	FKBP1B	-0.0711354	0.0742125	0.00680597	0.220989	0.00351351	2.74143e-07	-0.0883529	2.024e-15	-0.000155698	0.0784692	-0.000228856	0.259314	0.00122974	0.00137592	0.000888859	0.087308	-0.00354079	1.47459e-06	0.000592404	0.589721	0.000298527	0.772555	-0.000458191	0.686861	0.00341397	0.00672364	0.00038105	0.756786	1	0.857189
43153	CNP	0.151361	1.3201e-07	0.00488044	0.22113	-0.0011621	0.0181635	-0.136221	4.1964e-65	0.000176637	0.00411624	-0.000843516	3.36727e-09	0.00154236	1.17335e-08	0.000401809	0.271025	-0.00293759	2.22885e-08	0.00121933	0.109699	0.00114603	0.114895	0.000234449	0.770389	0.00124086	0.168252	0.000762123	0.382099	1	0.857189
42895	TXNL1	0.288403	3.73846e-16	0.00602553	0.221225	-3.69353e-05	0.951466	0.00854812	0.385456	-0.000672661	8.42102e-19	0.000485934	0.00558008	-0.00082645	0.0132317	0.000720159	0.109069	-0.00244086	0.000172057	-0.000814637	0.382502	-0.0020973	0.0199297	-0.00171177	0.0842682	-0.000863417	0.43492	-0.000209764	0.846078	1	0.857189
44201	MINDY1	0.127492	0.000978836	0.0065732	0.221268	-0.00322377	1.17974e-06	0.0154349	0.15138	-0.000203856	0.0138544	-0.000593689	0.0019148	0.00183195	4.74488e-07	0.000114496	0.815963	-0.00358719	4.24422e-07	0.000709315	0.490847	0.00126455	0.198505	-0.000479806	0.658656	0.00121763	0.314993	0.000336978	0.774696	1	0.857189
49492	GP2	-0.329804	1.07923e-26	-0.00525454	0.221367	0.0113744	3.18578e-102	-0.375018	0	0.000653067	1.14864e-21	-0.00144927	2.19789e-20	0.00134145	6.26533e-06	-0.00170705	2.12833e-05	-0.00272894	1.59825e-06	-0.000970717	0.247397	-0.00233112	0.00358173	0.00322926	0.00023784	-0.00237115	0.0149716	0.000574715	0.547746	1	0.857189
44329	ATXN2L	0.119749	2.39984e-12	0.0028976	0.222293	-0.000776799	0.00801469	-0.0105931	0.0257752	-3.56897e-05	0.330081	-0.000127212	0.13192	0.000891823	2.87309e-08	4.84971e-06	0.982184	-0.00203664	8.03948e-11	0.000170359	0.707799	-0.000364414	0.400645	6.50304e-05	0.891859	3.68005e-05	0.94511	-0.000177924	0.732123	1	0.857189
51631	LAT	-0.0226445	0.40541	0.00462548	0.22313	-0.000604274	0.195512	-0.0626854	1.62953e-16	-0.0001155	0.0558998	-0.000414461	0.00276753	0.00190423	4.1003e-13	0.00133067	0.000172081	-0.00257421	2.97931e-07	0.000609745	0.416685	0.00161309	0.0219891	-0.000161821	0.834645	0.0011693	0.17416	0.000622534	0.459521	1	0.857189
51631	IL12B	-0.579379	7.31364e-182	-0.00341005	0.22316	0.00822105	2.04109e-125	0.219271	0	-0.00103392	1.37172e-118	-0.000307327	0.00261584	0.000640283	0.000939327	0.000723091	0.00562274	0.00131622	0.000378998	0.000446624	0.419727	0.00189232	0.000268011	0.000963263	0.0919172	0.000319258	0.614781	8.02754e-05	0.897071	1	0.857189
49867	PDGFC	-0.0459376	8.895e-06	0.00175531	0.223529	0.000830258	2.82635e-06	-0.00647507	0.0248779	-0.00036085	5.5252e-56	1.19893e-05	0.819581	0.000257893	0.00964463	0.000686596	3.0098e-07	-0.000201598	0.291414	-0.00070674	0.0126629	5.57717e-05	0.834864	-0.000765013	0.00943433	-0.00108508	0.000915876	0.000264944	0.407014	1	0.857189
43120	TGFBR1	-0.0846065	6.09755e-27	0.00133336	0.22366	0.00159967	2.31576e-32	0.00220116	0.314932	-9.88631e-05	4.60275e-09	7.98857e-05	0.0409929	0.000186057	0.0121759	0.000118119	0.238293	-0.000548095	0.000145921	-0.000180932	0.38509	-6.37772e-06	0.974551	-0.000227739	0.301711	-0.000115006	0.640581	-0.000618503	0.0100479	1	0.857189
50836	IQGAP2	-0.117201	2.91006e-09	-0.00334675	0.223698	0.0031357	2.05635e-20	-0.0740739	4.0244e-41	7.39651e-05	0.0900681	-0.000129775	0.195619	0.000945652	6.71572e-07	-0.000204861	0.424278	-0.00282536	9.05409e-15	0.000666409	0.229744	0.000187995	0.712686	2.39606e-05	0.966166	0.00106412	0.0883532	0.000115675	0.849962	1	0.857189
43434	DAAM1	0.0794772	0.00737414	0.00501543	0.224113	-0.00068694	0.177005	0.00300484	0.715745	-0.000101906	0.108777	-0.00076278	1.96184e-07	0.00184946	3.46001e-11	0.00132264	0.000473092	-0.00254535	2.73141e-06	0.000759781	0.338278	0.00208909	0.00547901	-0.00023637	0.775859	0.00200732	0.0312296	0.000658792	0.464201	1	0.857189
50140	MPHOSPH8	0.13898	2.88265e-07	0.00458493	0.224235	-0.00094403	0.0421113	-0.0334916	9.45528e-06	-0.000226506	0.000159954	-0.000246028	0.0741366	0.00128806	8.16177e-07	0.000500094	0.156052	-0.00219463	1.12149e-05	0.00104878	0.156301	0.00124128	0.0769035	-8.27029e-05	0.914549	0.000609278	0.475944	0.00105767	0.207147	1	0.857189
44329	NMT1	0.108131	4.16005e-06	0.00396754	0.224274	-0.0003169	0.431498	0.0230024	0.00043064	-0.000297265	3.6771e-09	-2.24282e-05	0.846832	0.000665149	0.00261251	0.000596891	0.0456495	-0.00183512	2.04783e-05	-0.000153787	0.805642	0.000169217	0.776554	-0.000235703	0.720091	0.000113446	0.87734	0.000436838	0.541094	1	0.857189
42820	H2AP	0.0818158	5.45894e-06	-0.00304026	0.224385	-0.000517268	0.0937815	0.0104235	0.0373595	-2.67253e-05	0.486621	-0.000146562	0.0969533	4.8224e-05	0.77429	2.22186e-05	0.922483	0.000371147	0.26057	0.000315776	0.505951	-0.000317576	0.487061	-0.000477661	0.342651	-4.82268e-05	0.931752	-0.000382093	0.48671	1	0.857189
42978	HTR1A	0.243534	3.59295e-19	0.00459474	0.224873	-0.00172009	0.000226571	0.0850395	3.07319e-29	-9.54696e-06	0.870063	-0.000111719	0.407159	-0.000384441	0.133945	-0.000100108	0.771905	0.000767778	0.124129	-0.000170428	0.812233	-0.000312024	0.652335	0.000154386	0.83952	-0.00143043	0.0924415	-0.00186705	0.0246613	1	0.857189
44414	CHGA	-1.27709	0	-0.00520961	0.225155	0.025132	0	0.0116788	0.174079	0.000228955	0.000535973	0.000648121	2.26134e-05	0.000990161	0.000664924	0.00119481	0.00231643	0.0048472	1.21619e-17	-0.00132854	0.106253	-9.5851e-05	0.902541	-0.000131017	0.879641	0.00268225	0.0055253	0.000148433	0.874453	1	0.857189
44329	ARHGEF10	0.0893163	0.00755588	0.00563326	0.225467	0.000179757	0.753933	-0.106589	2.28351e-30	-0.000913773	4.16561e-37	-0.000395383	0.0167535	-3.95691e-05	0.899893	5.87705e-05	0.890047	-0.00299287	1.06065e-06	0.000829937	0.350917	0.00118278	0.163445	-0.000732599	0.433972	0.000806071	0.441067	0.00046993	0.644181	1	0.857189
44220	BCL2	-0.426336	1.04691e-108	-0.0032333	0.225737	0.00814822	2.77493e-134	0.027942	1.69231e-07	0.000184771	7.21686e-06	0.000751693	3.20529e-15	0.000475851	0.00850818	7.15062e-05	0.7692	0.00124244	0.000414935	0.000407124	0.426475	0.00047194	0.332704	-0.000260625	0.628738	-0.00141195	0.0189711	0.00186387	0.00141299	1	0.857189
44414	CILP	-0.763416	0	-0.00331688	0.226205	0.0148415	0	-0.207279	7.49739e-308	0.000541959	1.09324e-37	-0.000419278	1.7413e-05	0.00137526	1.29724e-13	0.00178631	9.63738e-13	0.00028054	0.437802	0.000377288	0.47223	0.0009533	0.056331	0.00134625	0.01476	-0.000933737	0.130095	0.000153704	0.797643	1	0.857189
50116	GALNT3	0.064938	1.78794e-05	0.00254535	0.227212	-0.00131621	3.98152e-07	0.0276334	6.07653e-11	-0.000374455	7.27308e-29	7.21305e-05	0.349429	0.000143295	0.326375	-0.00121764	5.85011e-10	-0.00214744	1.47313e-14	-0.000204689	0.620492	-0.000427593	0.27491	-0.000363396	0.399307	-0.00103949	0.0298918	-0.000881838	0.0594053	1	0.857189
44220	TMED8	0.0486994	0.184257	0.00615721	0.227325	-0.00147583	0.0189971	-0.00186886	0.854718	-0.000687623	2.40766e-18	-0.000634022	0.00050057	0.00212585	7.71792e-10	0.000496022	0.286795	-0.0041573	6.35998e-10	0.00157083	0.108333	0.00207099	0.0261125	-0.000446128	0.664919	0.00128616	0.263382	0.000748506	0.502301	1	0.857189
51505	NCS1	-0.723487	0	0.00170509	0.227846	0.0142988	0	-0.174234	0	-0.00032	5.51808e-46	-7.12456e-05	0.16573	0.000663855	9.79983e-12	0.000209451	0.112278	-0.000788676	2.48164e-05	-0.000746756	0.00750473	-0.00121347	3.82606e-06	-0.00100354	0.000515598	-0.000382932	0.232232	0.000941407	0.00266614	1	0.857189
43232	HS1BP3	-0.142588	9.17835e-06	0.00538754	0.228024	0.00312568	1.43465e-08	-0.02784	0.00185447	0.00025428	0.000230787	-0.000597224	0.000188751	0.00181565	2.12543e-09	0.000940253	0.021621	-0.00261728	8.72986e-06	0.00123532	0.148439	0.00101898	0.211298	-0.000132922	0.882664	0.00176444	0.0803543	0.000450232	0.645108	1	0.857189
43434	LZTFL1	0.0797311	0.00176976	0.00427096	0.228568	-0.000482488	0.270077	-0.0340759	1.56697e-06	0.000165235	0.00249176	-0.000735712	5.33021e-09	0.00111414	3.43632e-06	0.0008788	0.0069045	-0.00204397	1.18386e-05	0.000293838	0.666662	0.00118153	0.067688	-0.000499652	0.483918	0.00120746	0.131778	0.00130838	0.0908885	1	0.857189
51706	SERPINA11	-0.813175	0	-0.00245359	0.228595	0.00986305	0	0.432144	0	0.000705731	6.52104e-105	-0.000236072	0.00154113	0.000465018	0.00099654	-0.00126636	3.23016e-11	0.000826384	0.00218213	0.000768527	0.056763	0.000730869	0.054124	0.000199935	0.631952	-0.00117707	0.0108128	0.00158971	0.000449539	1	0.857189
43434	DTD1	0.17642	1.48568e-08	0.00520902	0.229225	-0.00328494	7.91549e-10	0.0542715	3.80276e-10	-0.000438581	4.98891e-11	-0.00106906	3.82979e-12	0.0013293	5.74588e-06	0.000924214	0.0200114	-0.00348454	9.7313e-10	0.000804821	0.334069	0.00107827	0.172186	0.000174831	0.841053	0.00140664	0.150567	0.000845641	0.370935	1	0.857189
44409	MYDGF	-0.174436	1.10215e-06	0.00598185	0.229327	0.00369891	1.71334e-09	-0.0385554	0.000107914	-0.00030741	6.43809e-05	-0.000332363	0.0612176	0.00227315	1.60704e-11	0.00226429	6.2579e-07	-0.00241325	0.000235741	0.00141538	0.14115	0.000299798	0.740991	-0.000308191	0.758674	0.00245895	0.0281579	0.0016852	0.122171	1	0.857189
44329	DNM3	-0.299969	1.87691e-52	0.0032833	0.229469	0.00653327	2.55574e-83	0.0177178	0.00119338	-0.000287402	9.51014e-12	0.000185849	0.0557939	0.000596061	0.0012676	0.000544862	0.0292506	-0.000639397	0.0761211	0.000623216	0.233454	0.000883007	0.0767778	1.56915e-05	0.977258	0.00098729	0.108482	-0.000128988	0.829264	1	0.857189
50140	MSTN	0.426025	2.23215e-112	-0.00315472	0.229901	-0.00221088	8.34719e-12	-0.533991	0	0.000947072	3.75917e-113	-0.000127896	0.182587	-0.000334548	0.0658926	0.00023119	0.346451	-0.00224438	1.12991e-10	-0.000164039	0.75022	-0.000700893	0.151551	-0.00150817	0.00496488	0.000650129	0.274801	0.000496513	0.395208	1	0.857189
49789	TST	0.132749	8.13998e-07	0.0045039	0.229931	-0.00128148	0.00550019	-0.0293674	9.26131e-05	-0.000402297	1.29282e-11	-0.000374767	0.00601374	0.0012985	5.28864e-07	0.000350218	0.316368	-0.000670653	0.177177	0.00128365	0.0808943	0.000237922	0.73329	0.000472253	0.538052	0.0018173	0.0328806	0.00123415	0.139146	1	0.857189
44150	CFHR2	-0.370896	3.27633e-75	0.00336924	0.230196	0.00421078	5.22757e-34	0.0564536	9.35446e-24	0.000142646	0.000966702	0.00198171	2.96128e-87	0.0023599	1.98006e-35	-2.28463e-05	0.929134	-0.00104694	0.00466806	-0.000644022	0.230336	0.000598634	0.243345	0.000961007	0.0899931	-0.00353668	2.19902e-08	0.00226496	0.000228164	1	0.857189
51455	PAM	-0.364208	2.74149e-286	0.00167406	0.230197	0.00593082	1.15156e-258	0.0128421	4.26806e-06	7.48166e-05	0.000738047	7.32281e-05	0.152405	0.000720822	1.05584e-13	-0.00032879	0.012137	-0.000924767	5.53766e-07	0.000646088	0.0191254	-0.000149126	0.566425	0.000561758	0.0493069	-1.8703e-05	0.95282	-0.000114622	0.711951	1	0.857189
43195	GTPBP2	0.198569	6.25772e-12	0.00481156	0.230627	-0.00249483	4.76214e-07	-0.0382824	1.87022e-06	-0.000105583	0.0882115	-0.000435399	0.00229568	0.00161604	2.76806e-09	6.15367e-05	0.866901	-0.00277769	1.51418e-07	0.000894742	0.240834	0.000818944	0.264013	0.000141501	0.860848	0.000473289	0.599764	0.000808035	0.358434	1	0.857189
43120	SEMA6C	0.0510589	6.3543e-08	-0.00157592	0.230639	-0.000105516	0.514618	-0.0325603	3.40236e-35	-9.95959e-05	8.59111e-07	7.11821e-05	0.129082	-6.88143e-05	0.439611	0.000116358	0.332926	-0.00076452	1.00885e-05	-0.000147372	0.555428	-0.000771862	0.00129218	-0.000123681	0.640156	-0.000352064	0.233555	-0.000497999	0.0840719	1	0.857189
50116	SPRY2	0.255017	1.51266e-14	0.00553554	0.230734	-0.00270203	2.03702e-06	-0.0620295	2.06543e-11	0.000415694	1.59864e-08	-0.000512862	0.00239745	0.0015607	1.07405e-06	0.000568641	0.186708	-0.00375421	8.47942e-10	0.000215356	0.812082	0.000630955	0.462198	-0.000382415	0.685644	0.00310872	0.00304076	0.000185897	0.856084	1	0.857189
50836	DKKL1	-1.13551	1.92726e-296	-0.00511893	0.230741	0.014473	1.17212e-165	0.29165	9.45594e-252	-0.00157094	2.74128e-118	0.00156974	7.09543e-24	-0.00376455	3.99018e-37	1.9585e-05	0.960767	0.00212032	0.000178899	0.00038573	0.654393	-0.00287825	0.00028294	-0.00516966	3.8064e-09	-0.000530623	0.58422	0.00215352	0.0233416	1	0.857189
50510	OBP2B	1.38568	0	-0.00376572	0.230771	-0.0160665	0	-0.95126	0	-4.08969e-05	0.412589	0.000212109	0.0631983	-0.00124831	8.34061e-09	-0.000449375	0.126429	-0.000632073	0.128687	0.000397665	0.519344	0.00223555	0.000135959	-0.00110372	0.0855729	0.000933119	0.190616	0.00127385	0.0692577	1	0.857189
43195	STX1B	-0.103832	3.97993e-12	-0.00249148	0.230849	0.00216927	2.92354e-17	0.0346644	8.10216e-17	-9.24124e-05	0.00397219	-5.76987e-05	0.4354	0.000175786	0.211862	-6.68629e-06	0.971959	7.84454e-05	0.774658	0.000308625	0.434835	-5.49703e-06	0.988453	-0.000476598	0.254421	-2.66818e-05	0.954464	-0.000939579	0.0392814	1	0.857189
50122	DPP4	-0.23432	1.04409e-107	0.00176916	0.231016	0.00346852	7.71471e-81	0.0557566	6.43832e-79	0.000252792	4.62266e-27	-0.00039322	4.06448e-13	0.000226044	0.0274694	0.00035553	0.0104518	-0.00199765	1.89476e-24	0.00137696	1.9715e-06	-5.85159e-05	0.831808	0.00065884	0.0287705	-0.00013984	0.676149	0.000462283	0.160313	1	0.857189
43232	DMD	-0.174345	3.48368e-21	0.00307063	0.231216	0.00517192	6.66065e-60	-0.0531166	4.52366e-25	0.000169389	1.91313e-05	-0.000267841	0.00352395	0.00097418	2.16055e-08	0.000123065	0.600352	-0.00233069	5.24802e-12	-5.19919e-05	0.915596	-9.03353e-05	0.846877	-0.000279759	0.588299	-0.00024212	0.675848	0.000395923	0.480339	1	0.857189
50116	TNFRSF13C	-0.252239	8.04349e-63	-0.00250988	0.231298	0.00390992	1.11688e-51	0.0490818	1.70535e-31	0.00131996	0	0.000511156	2.65795e-11	0.000595397	4.14758e-05	-8.44299e-05	0.665843	-0.000317574	0.252816	-0.000242024	0.55616	-0.000381965	0.326858	0.000638364	0.136642	0.000263978	0.57932	0.000815929	0.0795191	1	0.857189
51505	SPINK6	-0.662031	1.34732e-246	-0.0032784	0.231371	0.0136226	0	-0.285442	0	0.000873662	2.36362e-89	-0.000341819	0.000598298	0.00056989	0.00254535	0.00105462	3.67434e-05	-0.000963033	0.00786679	0.00155858	0.00397296	-0.00144138	0.00460855	0.00163475	0.00350151	0.00153638	0.0133613	0.00241712	6.86628e-05	1	0.857189
50140	EDIL3	-0.575333	0	-0.0022095	0.231392	0.00989184	0	0.0528603	3.27654e-46	-7.36552e-05	0.0121229	0.000246889	0.000250613	-0.00017883	0.161752	0.000939349	5.21963e-08	0.00128325	1.53906e-07	0.000296026	0.413561	0.000497498	0.14741	0.000577831	0.12554	0.00105902	0.0113489	0.000486108	0.236139	1	0.857189
43232	NIT1	0.210749	9.9652e-36	0.00280734	0.231549	-0.00388942	4.34075e-41	-0.103262	1.36997e-106	0.00014967	3.65152e-05	-0.000281598	0.00079929	0.000674141	2.28586e-05	0.000321673	0.134465	-0.000792543	0.0103274	0.0007262	0.105666	0.000271442	0.525941	0.000238754	0.613609	0.000290841	0.583013	2.98817e-05	0.953573	1	0.857189
43602	RAPGEF2	0.161153	1.57936e-17	0.00314329	0.231749	-0.00143422	9.80512e-06	-0.0291827	2.90105e-08	-8.47101e-05	0.0363855	-0.000468863	5.60315e-07	0.000809568	5.72868e-06	0.000114434	0.63492	-0.0015774	5.33237e-06	0.000334621	0.506198	0.000169654	0.724445	-0.00038757	0.465195	0.000914688	0.122381	0.000756716	0.191062	1	0.857189
42978	ECSCR	0.0972303	9.74077e-08	0.00303245	0.232112	-0.000150097	0.631194	0.0113593	0.0251966	-0.000231447	3.32422e-09	0.000249668	0.00572156	-3.64055e-05	0.832321	-0.000231273	0.317769	-2.6367e-05	0.937209	0.000186934	0.697504	-0.00120882	0.00922398	0.000269626	0.597777	-0.00110262	0.0529997	-0.000850619	0.126765	1	0.857189
44316	SERPINA3	-0.112092	4.99834e-98	0.00088387	0.232763	0.00176047	1.53627e-82	0.0321455	5.75543e-104	-3.32271e-05	0.00354503	0.000150242	1.13174e-08	0.000230589	4.10142e-06	-0.000170368	0.0119695	0.000107207	0.271608	-0.000124993	0.377879	0.000159448	0.238524	0.000128282	0.390911	-0.000272745	0.101679	-0.00017786	0.272183	1	0.857189
44448	CGB3_CGB5_CGB8	-0.631164	0	-0.002495	0.233139	0.00838355	1.29988e-228	0.276576	0	3.17747e-05	0.32569	0.000115227	0.122725	0.000420745	0.00301383	0.00040157	0.0361294	0.000110281	0.689277	0.000434311	0.278635	0.000592302	0.121083	0.000330432	0.433223	-0.000267706	0.569588	0.000862961	0.059783	1	0.857189
43434	ERP29	0.123351	0.00362541	0.00702737	0.233446	-0.00271036	0.00019463	0.0258576	0.0283781	8.57212e-05	0.34533	-0.000830439	7.41092e-05	0.00241553	1.41663e-09	0.00144723	0.00745837	-0.00369626	1.89534e-06	0.000990691	0.382428	0.00182697	0.0892869	0.000573768	0.628764	0.00241159	0.0702371	0.00105898	0.410481	1	0.857189
51706	ICAM3	-0.173425	5.40499e-78	0.00153682	0.234013	0.00305578	3.18373e-82	0.0135049	1.75088e-07	0.000326071	9.05832e-57	0.000262254	2.8361e-08	0.00068146	2.73528e-14	-4.25798e-05	0.724708	0.000161122	0.345748	0.000623379	0.0147426	0.000368932	0.124995	0.000808891	0.00222831	0.000704675	0.0160445	0.000331848	0.247655	1	0.857189
44329	FGD3	0.165384	8.2699e-09	0.0047452	0.234144	-0.00213094	1.49462e-05	-0.0316015	7.52278e-05	-0.000128237	0.037239	-0.000380286	0.00734233	0.00138564	2.86127e-07	0.000195522	0.592014	-0.00332234	2.75682e-10	0.000762455	0.318002	0.000900461	0.216362	-0.000762952	0.34238	0.000504185	0.57446	0.000456105	0.601428	1	0.857189
44414	CYTL1	0.0730808	1.87366e-17	-0.001422	0.234153	0.000137503	0.350915	-0.155129	0	-0.000143534	6.3281e-15	-2.17977e-06	0.959153	0.00039801	8.83031e-07	-0.000401338	0.000235975	-0.000356593	0.0237273	0.000103264	0.651866	-0.000378476	0.0823049	-0.000187502	0.436138	-0.000223765	0.405499	0.00058824	0.0244444	1	0.857189
44409	GMFG	0.0359524	0.159909	0.00423074	0.234184	-0.000937348	0.0326759	0.0207572	0.00353371	-0.000298835	5.47094e-08	-0.000489844	0.000113314	0.00119639	6.95077e-07	0.000955433	0.00325649	-0.0018061	0.000117689	0.00101518	0.139715	0.000675802	0.297138	6.23262e-05	0.930722	0.000608094	0.447497	0.000288678	0.711002	1	0.857189
43434	TNFAIP8L2	0.176627	8.00302e-15	0.00375964	0.234412	-0.00233078	2.28948e-09	0.0388657	8.02022e-10	-9.40322e-05	0.0534963	-0.000264087	0.0187362	0.000888095	3.29595e-05	0.00126091	1.3734e-05	-0.00227339	4.61332e-08	0.000179864	0.76739	0.000884184	0.125053	-0.00048644	0.444537	0.000593896	0.405616	0.000695691	0.313186	1	0.857189
51082	FCER2	-0.50635	1.14388e-166	-0.00303646	0.234435	0.00862484	1.57259e-164	0.0349539	8.53798e-12	0.000185115	4.98821e-06	-0.000162421	0.0806651	0.000890417	4.4294e-07	0.00111235	2.9587e-06	0.000712833	0.0349586	2.57757e-05	0.959352	-0.000637522	0.180021	0.000452129	0.388034	0.000816588	0.159156	0.00102648	0.0708028	1	0.857189
44300	ESYT2	0.0378397	0.199488	0.00487918	0.234459	0.00121761	0.0160988	-0.0814208	3.5486e-23	0.000872145	4.72019e-43	-0.000982308	1.65227e-11	0.00220455	1.98719e-15	0.000997265	0.0077865	-0.00136345	0.0116845	-0.000169604	0.828945	0.00170985	0.0222956	-0.000123313	0.88139	0.00138997	0.132423	0.000623529	0.487098	1	0.857189
43418	C7	-0.504778	0	0.0018911	0.234661	0.00832432	0	0.0440034	1.91176e-43	0.000549848	3.19751e-111	5.1849e-05	0.360152	-8.85722e-05	0.411146	0.000143433	0.325695	-0.000528704	0.0116015	-0.000365431	0.227093	0.000425398	0.143241	-0.000825382	0.00997616	-0.000344091	0.336704	0.000190799	0.583199	1	0.857189
44117	MPRIP	-0.0748301	1.94948e-06	0.00259427	0.235088	0.00105938	8.58608e-05	-0.00218104	0.618077	-0.000118122	0.000451567	0.000182416	0.01893	-9.4293e-05	0.523365	0.000335723	0.0932998	0.000143513	0.618707	7.98065e-05	0.848717	0.000545055	0.172879	-0.00059082	0.181066	-0.000315502	0.521842	0.000308718	0.518743	1	0.857189
50999	FABP9	0.832504	0	-0.00327959	0.235714	-0.013127	0	-0.130404	8.76615e-122	-0.000884842	2.02392e-89	-0.000717373	1.20215e-12	0.00250868	2.99843e-39	0.000270628	0.296117	0.00229599	3.80238e-10	0.000782654	0.151179	0.00187472	0.000268291	-0.000346935	0.539499	0.00129751	0.0385076	0.00300585	1.01896e-06	1	0.857189
50359	IL17RB	-0.378853	1.39338e-84	0.00320592	0.235947	0.00823226	2.62446e-134	-0.155235	5.31707e-179	-0.00135899	5.48799e-217	0.000717388	3.53667e-13	-0.00171837	3.82355e-20	-0.00258867	1.47704e-24	-0.00112709	0.00166101	-0.000712713	0.179524	0.000704843	0.160732	-0.000810749	0.142128	-0.00115469	0.0595154	8.22273e-05	0.891065	1	0.857189
49871	SIRT5	0.119172	8.07557e-10	-0.00320198	0.236207	-0.000720868	0.0302327	0.00959959	0.0761675	-0.00016802	8.72399e-05	0.000118628	0.227885	3.63457e-05	0.84563	3.64495e-05	0.884822	6.1475e-07	0.99863	-0.000937708	0.0769773	-0.000112761	0.822624	-0.000498939	0.366604	0.000907724	0.139027	0.000425646	0.479262	1	0.857189
50910	PLXNB3	0.00436421	0.796657	0.00279581	0.236221	0.000959797	0.000952653	-0.0463497	1.13176e-22	7.76731e-05	0.0389145	-0.000333905	0.000111312	0.00139725	1.416e-17	0.000226862	0.305868	-0.00124295	6.93404e-05	0.00048993	0.294153	0.00077049	0.080489	-0.000666386	0.168252	0.000706174	0.186647	0.000903957	0.0858439	1	0.857189
50999	CNTNAP2	-0.38141	9.28889e-146	-0.00244101	0.236521	0.00480963	6.47681e-80	0.203166	0	-2.50261e-05	0.446017	-0.000550119	2.71804e-13	-3.25352e-05	0.819504	5.70604e-05	0.767643	0.0018156	3.11033e-11	5.13939e-05	0.8994	0.000314128	0.412775	0.000318048	0.450601	-0.00107162	0.021887	-0.00113824	0.0130375	1	0.857189
44329	MRPL28	0.0403747	0.00213868	0.00216227	0.236819	3.28118e-05	0.884331	-0.000803906	0.826038	-5.76294e-05	0.0410784	-6.52855e-05	0.315231	4.8281e-05	0.696333	-3.77969e-05	0.821154	0.000179959	0.455554	0.000172012	0.623019	-1.02512e-05	0.9755	-0.000129059	0.725993	-0.000565511	0.169372	0.000114484	0.774808	1	0.857189
44220	AP3B1	-0.0303686	0.270299	0.00453129	0.236846	0.00181269	0.000125316	-0.0386732	4.56107e-07	5.70553e-05	0.334279	-0.000430266	0.00166258	0.0018144	2.77452e-12	0.000461861	0.186669	-0.00284694	1.74142e-08	0.000529152	0.471421	0.0013466	0.0541302	0.000379729	0.62354	0.00041183	0.633501	0.00114068	0.17346	1	0.857189
50843	HLA-DRA	-0.371054	6.63509e-183	0.00211373	0.236886	0.00675016	2.62945e-205	0.00315162	0.378705	0.000269461	2.57257e-21	-0.000358399	3.72772e-08	1.95457e-05	0.874109	-0.000233375	0.162803	0.000828191	0.000469858	0.000111539	0.751252	0.000873466	0.00856046	-0.000232064	0.525199	0.000307645	0.448018	-1.00082e-05	0.979879	1	0.857189
42948	ACSL1	0.0787659	2.3067e-09	0.00217197	0.236951	-0.000832085	0.000233919	0.0261657	1.01894e-12	-8.31522e-05	0.00316331	4.19929e-05	0.518028	-5.4152e-05	0.661551	-0.000147534	0.37808	-0.00027156	0.262026	0.000109094	0.753529	-0.00047353	0.157046	-0.000113293	0.758758	-0.000271354	0.510314	-6.89832e-05	0.863758	1	0.857189
50593	MATN3	-0.0419082	0.000288559	0.00190302	0.237426	0.00154127	7.77697e-15	-0.081925	2.22898e-141	-0.000944405	3.50424e-294	0.000335938	9.60457e-09	-0.000928383	6.4007e-17	-0.000642175	2.05058e-05	-0.0003629	0.0886354	0.0001206	0.703195	-0.0005609	0.0619018	9.6589e-05	0.769178	0.000839582	0.0215649	-0.000971512	0.00681856	1	0.857846
44414	PTPRC	-0.178416	2.35933e-104	-0.00134416	0.238756	0.0030263	4.42406e-102	0.0351187	2.77299e-53	5.75078e-05	0.00106204	0.000145689	0.000336089	0.00062878	4.15341e-16	0.000344776	0.000935867	0.000229196	0.127824	0.000450304	0.0393052	0.000248289	0.232456	8.54878e-05	0.709938	-4.27484e-05	0.867781	0.000155897	0.532164	1	0.861585
50999	TNFSF11	0.832977	0	-0.00360323	0.240236	-0.0140522	1.76204e-299	-0.0718837	1.51807e-31	-0.000161018	0.000983107	-0.000299484	0.00748503	0.00209916	4.58814e-23	-0.00258887	2.13232e-19	-0.00106803	0.00863356	0.000752845	0.21326	-0.00234067	4.10605e-05	0.000405847	0.517615	-0.00217491	0.00176687	0.00137998	0.0430624	1	0.86393
42948	ABRAXAS2	0.143414	1.57819e-09	0.00388562	0.240401	-0.000913368	0.0250197	-0.0917677	1.10558e-43	0.000373689	1.86853e-13	-0.00048634	3.2738e-05	0.00142799	1.51241e-10	0.00090268	0.00276821	-0.000994041	0.0227199	0.00119918	0.0554794	0.000905075	0.133411	-0.000148877	0.822808	-0.000135486	0.855271	0.000840122	0.246225	1	0.86393
42820	RBM25	0.0491801	0.00264336	0.00267019	0.240471	-0.000676654	0.0158919	0.00568306	0.211808	-0.000129072	0.000219257	0.000173971	0.0302133	-0.000178885	0.241936	-9.19978e-05	0.657614	0.000494476	0.0991846	0.000289125	0.502895	-0.000354254	0.393764	-9.33391e-06	0.983726	-0.000169791	0.740133	0.000679188	0.173816	1	0.86393
44201	RCC1	-0.0435658	0.016956	0.00297538	0.240588	0.00300466	8.38212e-22	-0.0217645	1.80747e-05	-5.973e-05	0.126417	0.000170876	0.0583417	-0.000255186	0.136974	0.000340253	0.142662	0.000301307	0.36783	-0.000520427	0.283987	-0.000629758	0.174703	-0.000723822	0.157794	-0.00228277	6.54212e-05	-6.78979e-06	0.990247	1	0.86393
43120	NEDD9	-0.026089	0.0326107	-0.00199243	0.241325	0.00120218	9.52021e-09	-0.0240928	1.38347e-12	0.000153798	4.22459e-09	-4.74193e-05	0.434403	0.000263318	0.0222378	0.000368923	0.0176299	-0.000324513	0.147318	4.15792e-05	0.897661	-0.00026694	0.389579	0.000566834	0.0976478	-0.00121151	0.00152927	-0.000706578	0.0580971	1	0.864876
43232	ENO3	0.481106	1.26531e-108	-0.00352912	0.241443	-0.00301846	4.66872e-16	-0.413054	0	0.00150052	2.27749e-225	-0.000453833	2.5684e-05	0.000367533	0.0721106	0.000984308	0.000361234	-0.00123181	0.00190549	0.00064377	0.263931	-0.000658097	0.231081	-0.000528005	0.384458	0.00046401	0.495129	0.00128388	0.0513866	1	0.864876
51505	FXN	0.0058837	0.821767	0.00426332	0.242047	0.000848437	0.058189	-0.0421871	7.35269e-09	0.000530691	4.9509e-20	-0.000417986	0.0016054	0.00207198	1.64988e-16	0.00142665	2.71088e-05	7.70615e-05	0.872989	0.00111405	0.121727	0.00111644	0.0990331	0.000728088	0.328297	0.00131534	0.111363	0.00171565	0.0336691	1	0.865155
50678	GLB1	-0.071185	1.97954e-06	0.00243974	0.242113	0.0039587	1.59835e-53	-0.223755	0	-0.000169204	3.32137e-07	-0.000478579	2.82476e-10	0.000999511	3.76206e-12	-0.000552115	0.00468742	-0.000509394	0.0649458	0.000333581	0.41604	0.000476677	0.220431	-0.000314909	0.460186	-0.000511535	0.279765	-7.96701e-05	0.863919	1	0.865155
42948	GASK1A	0.114137	2.53156e-13	-0.00253908	0.24256	-0.00192402	6.5034e-13	-0.0168079	0.000108363	0.000326688	1.16801e-22	0.000757966	6.43328e-23	-0.000720715	8.47317e-07	0.000448964	0.0233766	-0.00115541	5.49762e-05	-0.000115646	0.778445	0.00140877	0.000373294	-0.00110093	0.0116523	-0.00117005	0.0164218	-0.000203083	0.669384	1	0.865299
50436	HNMT	-0.821706	0	-0.00287367	0.242745	0.015716	0	-0.122242	4.256e-135	-0.000305339	5.84504e-15	1.14099e-06	0.989847	0.000642625	0.000155765	-6.2793e-05	0.785492	0.000919496	0.00473928	0.00102051	0.0345875	1.18206e-05	0.979462	0.000345661	0.491712	-0.00136345	0.0145345	0.00055054	0.315988	1	0.865299
42820	PBK	0.0133268	0.225427	0.0017829	0.24355	-0.000357693	0.0578714	-0.00477736	0.118352	3.42862e-06	0.883856	9.17488e-05	0.0890059	-9.15934e-05	0.372671	9.01678e-05	0.518062	0.000653998	0.0011762	-7.84783e-05	0.786723	2.52678e-05	0.927884	0.00016553	0.590407	-1.67498e-05	0.961171	-0.000163295	0.626586	1	0.866259
51082	IL7R	0.0711982	0.000204491	-0.00310876	0.244372	-0.00291004	8.81367e-19	0.107317	3.9753e-89	0.000514974	6.66606e-34	0.00032032	0.000986421	-0.000647152	0.000448419	-0.00106853	1.75935e-05	0.000349481	0.322793	0.000497048	0.347283	-0.000144064	0.772027	-0.000181426	0.740466	-0.00013946	0.818136	-0.000448903	0.449882	1	0.866259
50999	DPP10	-0.216435	7.02256e-66	-0.00204431	0.244885	0.00301153	5.16139e-44	0.122413	1.49517e-261	0.00114581	0	-6.19497e-06	0.92308	0.000543707	7.73094e-06	0.000173623	0.291629	0.00129978	2.44278e-08	0.000186535	0.590424	-0.000224279	0.492762	0.000609982	0.0896623	6.58902e-05	0.86868	-0.00120346	0.00207643	1	0.866259
44201	RAB2B	0.0680888	0.00182661	0.00352582	0.245394	-0.000846013	0.0239536	0.00886757	0.14448	6.95648e-05	0.13704	-0.000448936	3.26242e-05	0.000927991	6.2718e-06	0.000337109	0.225043	-0.00229644	9.90925e-09	0.000210322	0.717584	0.00114583	0.0391342	7.63795e-05	0.900912	0.000991301	0.147533	0.000739247	0.266248	1	0.866259
42948	GCLM	0.139513	1.3161e-17	0.00264092	0.245637	-0.000905631	0.00122412	-0.0525597	6.99286e-31	7.12793e-05	0.0410788	1.66054e-05	0.836501	0.000266859	0.0815491	0.000250638	0.226663	5.2098e-05	0.862074	0.000494553	0.250461	-0.000298062	0.472043	0.000807813	0.0770634	-0.000190656	0.708801	-0.000184957	0.710298	1	0.866259
43120	SLITRK1	-0.204438	9.26237e-62	-0.00198998	0.245739	0.00178977	2.39234e-17	0.194481	0	-8.52428e-05	0.00123623	-0.000727511	1.40426e-32	0.000310832	0.00743	9.82405e-05	0.530735	-0.000406467	0.0718123	-0.000350189	0.282621	0.00105733	0.000724617	-0.00148218	1.74188e-05	-0.000998463	0.00957891	-0.000466673	0.214443	1	0.866259
51082	LILRA2	-0.468903	1.28662e-273	0.00213174	0.24579	0.0064714	8.93205e-179	0.139108	2.25597e-308	-0.000767379	1.28659e-151	0.000987883	2.76711e-49	0.00121062	1.3928e-21	0.000907679	1.14243e-07	-0.000169845	0.484772	-0.00185876	3.22792e-07	0.000342448	0.316673	0.000221057	0.557338	0.000116024	0.780903	0.000573899	0.160165	1	0.866259
51420	FGF23	-0.311581	2.72722e-51	-0.00334535	0.245949	0.00525856	9.67202e-50	0.20597	1.09309e-275	-3.82023e-05	0.404385	0.000144293	0.168704	0.00106262	9.12597e-08	0.00117558	1.23008e-05	-0.00125375	0.00101011	-0.00292225	2.82982e-07	-0.0014458	0.00690758	-0.00149772	0.0110011	0.00123791	0.0584971	0.00115464	0.0708767	1	0.866259
51505	GALNT2	0.141413	1.17079e-52	0.00149647	0.246207	-0.00126296	1.71441e-15	-0.125487	0	-0.000281698	6.60894e-43	0.000151333	0.00125714	0.000262815	0.00313506	-0.000273497	0.0230905	-0.0012285	6.25183e-13	0.000157491	0.536701	-0.00140747	4.31736e-09	-0.00016523	0.531013	-3.34337e-05	0.909016	0.000491142	0.0859673	1	0.866259
43120	C1QL2	0.315568	5.13854e-93	0.00248314	0.246634	-0.00739959	2.30015e-171	0.229825	0	-0.000459571	5.06965e-44	-0.000384422	4.98165e-07	0.000561826	0.000108809	8.55275e-05	0.662443	0.00105049	0.000198097	-0.000793044	0.0516241	-0.000916961	0.019037	-3.87806e-05	0.928358	-0.000706974	0.142294	0.000595338	0.205235	1	0.866259
49738	CEP43	0.119698	1.58e-06	0.00401919	0.246937	-0.000341478	0.424492	-0.109922	4.75614e-56	-0.000314049	1.27803e-08	-5.44883e-05	0.667046	0.00121013	4.52734e-07	-0.00026508	0.413426	-0.00204501	8.77001e-06	0.000859151	0.21596	0.000653932	0.311011	0.000628824	0.3774	-0.000374691	0.634049	0.000228398	0.767104	1	0.866259
42948	PGLYRP4	0.298734	3.40062e-42	0.00353445	0.247237	-0.00203633	6.19477e-08	-0.13133	3.78698e-102	7.26362e-05	0.12111	0.00070818	5.66323e-11	-0.000160676	0.434825	0.000219351	0.430741	0.000632315	0.11637	0.000574056	0.32053	0.000277259	0.618373	0.000402776	0.511536	-0.00107046	0.118418	0.0016625	0.0129098	1	0.866259
50440	NAAA	-0.194015	6.36566e-20	0.00342159	0.247432	0.00428073	6.99908e-32	-0.0083278	0.160021	0.000367019	6.32155e-15	0.00130068	1.32018e-33	5.52884e-05	0.786445	-0.00130067	2.668e-06	-0.001753	7.62403e-06	-0.00140634	0.0154932	0.00046617	0.398137	-0.000609942	0.313037	-0.00173053	0.00989095	-0.000297164	0.652141	1	0.866259
43602	KIAA1549L	0.0351318	0.000479615	0.00161777	0.247455	-0.000727854	2.48207e-05	0.0141975	3.94837e-07	-6.44784e-05	0.00276282	6.95984e-05	0.162687	6.00192e-05	0.527378	-3.70544e-05	0.772652	-0.000138995	0.451038	0.000158918	0.553011	-0.00104201	4.73712e-05	0.000188975	0.503406	-0.000655683	0.0374419	-0.000440339	0.152821	1	0.866259
51082	TIMP4	-0.891956	0	0.00230836	0.24746	0.0140203	0	0.222614	0	4.05308e-05	0.200878	-0.000113453	0.118469	0.000401704	0.00355717	0.00166615	3.41025e-19	-0.000123358	0.640537	0.000190593	0.629669	-6.38856e-05	0.863516	0.00033397	0.414611	0.000347877	0.442826	0.000877594	0.048109	1	0.866259
44329	NFIC	0.0853408	2.72985e-08	0.00246507	0.248029	-0.000352535	0.180636	-0.00755528	0.076859	-4.43653e-05	0.177987	-7.8992e-05	0.297959	0.000349597	0.0155028	-0.000363282	0.0627435	-0.000689723	0.0143053	4.76408e-05	0.907165	-0.000882409	0.0235626	-0.0010222	0.0174316	0.00060738	0.206153	-0.000105377	0.82155	1	0.866848
50116	FXYD5	0.0966111	3.37117e-05	0.00374511	0.248318	-0.000740592	0.0637823	0.0167735	0.00986461	-0.000320607	5.47917e-10	-0.000395166	0.000866721	0.000778104	0.000535198	-7.16398e-05	0.812779	-0.00185463	1.58861e-05	0.000231341	0.716147	-0.000401709	0.505113	-7.2232e-05	0.913318	0.00150385	0.041228	-7.26672e-05	0.9196	1	0.866848
44409	LRRC59	0.0724948	2.16256e-05	0.00273437	0.249105	0.000388508	0.184473	-0.018004	0.000149177	4.82487e-05	0.188297	-0.000403265	1.90441e-06	0.00094424	4.33739e-09	0.000351831	0.104328	-0.00107404	0.000597539	7.60804e-05	0.868231	0.000604332	0.162257	0.000471353	0.324367	0.0010744	0.0442535	0.000738959	0.155128	1	0.866848
51631	FASLG	0.437622	3.21498e-235	-0.00213344	0.249981	-0.00988222	0	0.216025	0	-0.000837472	7.81452e-176	0.000198181	0.00339518	-0.0014094	4.47449e-28	0.000393814	0.0228227	-0.000115123	0.638869	0.000325312	0.375001	-0.0012586	0.000253395	0.0007314	0.0534058	0.00148615	0.000406299	-0.000687191	0.0946166	1	0.866848
49871	GHRHR	0.101322	2.42813e-07	-0.00314417	0.250273	-0.000492755	0.143145	0.0190085	0.000518993	-0.000163075	0.000167148	-6.44543e-05	0.517252	-0.000337681	0.073785	-7.91864e-06	0.975185	0.000164102	0.650543	0.000369833	0.490546	-0.000748797	0.141184	0.000522366	0.350142	0.0003	0.628886	-0.000840128	0.167505	1	0.866848
51631	HCLS1	0.00100411	0.959807	0.00319506	0.25035	4.46763e-05	0.895988	-0.0588848	3.70357e-26	0.000211932	1.65562e-06	-0.000516628	3.48938e-07	0.00132324	5.81244e-12	0.000672053	0.00954454	-0.00115951	0.00161351	0.000957552	0.0814608	0.00114247	0.0266885	0.00025062	0.65876	0.000670365	0.287216	-0.00079189	0.198725	1	0.866848
51518	CLEC1B	-0.0280716	0.413311	0.00549881	0.250357	0.00111294	0.0586263	0.0035875	0.708042	-0.00039187	2.41663e-07	-0.000537221	0.00208531	0.00320023	4.33755e-22	0.00215523	1.42271e-06	-0.00155233	0.0142521	0.000525832	0.579045	0.00105101	0.237988	-0.000396562	0.685647	0.00154974	0.152886	0.00206247	0.0528235	1	0.866848
51431	CCL8	-0.652451	1.69155e-196	0.00347891	0.25098	0.0106692	5.19998e-179	0.00828912	0.17186	0.000860622	2.58818e-71	0.000941357	1.28773e-17	-0.00135886	7.75639e-11	0.000207036	0.463886	0.00144854	0.000303973	-0.000332276	0.578705	0.00109966	0.0506751	-0.000155806	0.801347	0.00164578	0.0166068	0.00195468	0.00360923	1	0.866848
43120	HIF1A	0.120547	2.21632e-07	-0.00371934	0.251094	-0.000489928	0.219641	0.0195874	0.00249877	-0.000191537	0.00012315	-0.000123778	0.284325	0.000289983	0.186439	0.000167228	0.572405	-0.000745251	0.0807784	0.000331649	0.590362	-0.000872784	0.139919	-0.000683092	0.29491	-0.00167781	0.021279	-0.00208183	0.00339403	1	0.866848
44329	PCDH12	-0.0641569	1.22808e-12	0.00144015	0.25128	0.00101628	5.40119e-11	0.0184502	2.09612e-13	0.000112101	7.25948e-09	-0.000177479	7.03644e-05	0.000363764	1.86002e-05	-8.34903e-05	0.467172	0.000229391	0.166073	0.000339489	0.157758	0.000119355	0.60262	0.000565731	0.0252979	-0.000411534	0.145353	-0.000329113	0.231103	1	0.866848
43602	GTF2IRD1	0.286648	1.26876e-29	0.00404197	0.25133	-0.00213983	8.62009e-07	0.0438519	5.03798e-10	-0.000154638	0.00437823	-8.89204e-05	0.478888	2.82445e-05	0.906012	0.000483962	0.134148	0.000100531	0.828675	0.000158216	0.81462	-0.0010061	0.118883	-0.000473087	0.506048	-0.000197446	0.803543	-0.000289192	0.709346	1	0.866848
42978	GPR101	0.199213	1.54605e-20	0.00342176	0.251356	-0.00207696	1.60496e-08	0.0477088	1.2958e-15	-0.000106045	0.0211181	0.000105997	0.31824	-0.000560035	0.00559362	0.000302953	0.265567	7.90814e-05	0.840696	-0.000357623	0.526996	-0.000952883	0.0808032	7.17062e-05	0.904984	-0.00124222	0.06367	-0.000416503	0.524728	1	0.866848
44448	ACE	-0.136975	1.60532e-48	0.00148909	0.251774	0.00250279	8.43877e-55	-0.0264691	2.48656e-24	2.65343e-05	0.186232	8.65338e-05	0.0619396	0.000321108	0.000266456	-0.00026363	0.0267238	0.000242872	0.156151	0.000549541	0.0272654	5.55542e-05	0.814848	0.000360644	0.168348	-0.000218926	0.453886	-9.81508e-05	0.730234	1	0.866848
43120	DENR	0.133692	5.14628e-11	0.00324901	0.25178	-0.00112871	0.00122737	-0.0213717	0.000162662	-1.0435e-05	0.81099	-0.000284187	0.00495682	0.000301918	0.115855	0.000459369	0.0762993	-0.000922493	0.0134828	0.00040008	0.457899	0.000165487	0.749017	9.31516e-05	0.870303	0.000483896	0.447686	0.000732121	0.2389	1	0.866848
44329	LCN15	-0.300886	1.08156e-42	-0.00348683	0.253045	0.00769031	2.42362e-92	-0.104474	1.89951e-65	-0.000416973	8.60177e-19	0.000552693	3.51533e-07	-0.000971909	2.51865e-06	4.28725e-05	0.877897	0.00167234	3.26234e-05	-2.75529e-05	0.962371	0.000991358	0.075171	-0.000475491	0.439147	-0.00113676	0.0979028	0.000199218	0.765485	1	0.867851
50834	QDPR	-0.0017587	0.910332	0.0024863	0.253114	0.0010718	6.2975e-05	-0.0828721	2.52007e-80	0.000124173	0.000343804	-0.000760485	1.39688e-21	0.00080168	1.06359e-07	0.000664653	0.00113917	-0.000715885	0.013008	0.00120189	0.00524498	0.000586072	0.149472	0.000482065	0.279885	0.000760591	0.123015	0.000817981	0.092152	1	0.867851
43232	PRRT3	-0.220831	3.08562e-58	-0.00217663	0.253392	0.00271734	7.24976e-31	0.134306	6.96371e-268	-0.00109288	5.82472e-297	-0.000659202	4.45054e-22	0.00071326	3.45431e-08	3.69561e-05	0.832318	0.000897335	0.000349845	-0.000688753	0.0588279	0.000751261	0.0306774	-0.000361166	0.346973	-0.000305305	0.477959	-0.000256781	0.537882	1	0.867851
51228	NBL1	-0.431812	0	-0.00152404	0.253873	0.00827921	0	-0.0453102	2.83266e-64	-4.3435e-05	0.0402514	-5.11562e-05	0.294983	0.000914448	4.98766e-23	0.000573864	4.17298e-06	-0.000149762	0.396685	1.8874e-05	0.943187	0.000134088	0.589062	-0.000287108	0.293338	0.000258581	0.392651	0.000596788	0.0441477	1	0.867851
49867	PSMA1	0.130051	2.02818e-15	-0.00260319	0.254358	-0.00178271	2.17182e-10	0.0178545	9.39677e-05	-0.000230624	1.91262e-10	0.000144006	0.0836636	-0.000261078	0.0980128	6.78891e-05	0.749056	-0.000829985	0.00609581	0.00104535	0.0198872	-0.000415975	0.326207	-0.00130149	0.00529399	-0.000293534	0.571187	-0.000561199	0.267436	1	0.867851
44329	PHACTR2	0.0237406	0.560359	0.00645528	0.254669	-0.000238199	0.733379	-0.0374726	0.000952826	0.000196674	0.0245463	-0.00070321	0.000485136	0.0020008	1.8323e-07	0.00120068	0.0205531	-0.0024364	0.00112142	0.00139481	0.198572	0.000998603	0.334602	-0.000820338	0.47246	0.00259021	0.0423454	0.000979346	0.42991	1	0.867851
50116	WAS	0.193427	1.05351e-15	-0.00382238	0.254906	-0.00274887	2.99224e-11	0.031626	2.58847e-06	-1.23178e-05	0.817788	-5.90097e-05	0.630804	0.000585085	0.0118757	-9.61306e-05	0.758776	-0.00192549	1.49273e-05	-0.000204142	0.756532	0.000485166	0.436703	-0.00110103	0.108874	-0.000820184	0.282049	0.00071496	0.337256	1	0.867851
43195	DCC	0.22321	7.71122e-170	0.00126536	0.255042	-0.00403938	1.21127e-188	0.0277609	1.07547e-35	-6.55304e-05	0.000133376	-0.000101647	0.0101697	0.000239299	0.00147951	-0.000122743	0.227461	0.000292421	0.0459303	7.41886e-05	0.725494	-0.000189144	0.35165	-4.48656e-05	0.840957	-0.000244405	0.327913	-0.000256579	0.292419	1	0.867851
43434	SLC9A3R1	0.0267725	0.378398	0.00480761	0.255463	6.19463e-05	0.905429	-0.0139047	0.100091	-0.000408056	3.71782e-10	-0.000275395	0.0667428	0.00133469	3.06148e-06	0.000571692	0.140338	-0.00284457	3.14047e-07	0.000614732	0.449605	0.000859228	0.264927	-0.000443545	0.602101	0.00153347	0.108286	8.94304e-05	0.922755	1	0.867851
44409	PPM1F	0.0591391	0.00167312	0.00297238	0.255812	-0.000479894	0.137058	-0.0279018	9.79951e-08	-0.000156803	0.000105409	-0.000190589	0.0411429	0.00098057	3.20489e-08	0.000304616	0.202135	-0.00206077	2.32769e-09	0.000339825	0.501498	0.000380107	0.425296	-0.000201957	0.701723	0.000774736	0.188267	0.000560058	0.328429	1	0.867851
50140	STK11	0.0960441	0.000247113	0.00414585	0.256	-7.69909e-05	0.863964	-0.127757	4.16837e-68	0.000138754	0.0168308	-0.000516713	0.000106039	0.00168945	2.31028e-11	0.000916482	0.00721339	-0.00268757	2.70793e-08	0.00121514	0.0895659	0.00133353	0.0494984	0.00046829	0.530003	0.000890611	0.281474	0.0012214	0.132151	1	0.867851
43579	KLKB1	-0.0731581	6.10162e-16	-0.00142894	0.256605	2.52808e-05	0.870563	0.122369	0	-0.000227821	5.78503e-32	0.000256699	1.02046e-08	-0.00012223	0.151955	0.000201376	0.0818228	-0.00101037	1.13831e-09	4.27009e-05	0.858652	0.000283091	0.218941	-0.000724892	0.00427257	-0.000948486	0.000813105	-7.06722e-05	0.797668	1	0.867851
44201	NENF	0.350696	1.01934e-18	0.00625543	0.256665	-0.000104071	0.878497	0.0451856	4.26887e-05	-0.000615664	4.45988e-13	0.00055172	0.00495157	-0.00141038	0.000157696	0.000779664	0.122499	-0.0019095	0.00869567	0.000224208	0.831939	-0.00131646	0.192089	-0.00185875	0.0953801	-0.0029776	0.0166504	-0.000768308	0.524805	1	0.867851
51279	C1QTNF1	-0.447001	4.29372e-185	-0.00242162	0.257573	0.008606	2.69395e-232	-0.0430882	8.50509e-24	0.000231278	1.01554e-11	0.000684032	2.53817e-18	0.000554715	0.000183695	-0.000103002	0.607912	0.000856966	0.00247227	-0.000397774	0.346257	7.98826e-05	0.841425	-0.000484962	0.268092	-0.00124752	0.0100099	-0.000146588	0.757945	1	0.867851
50999	MICB_MICA	-0.883815	4.93e-62	0.00838091	0.25774	0.00767586	3.61811e-17	-0.0489087	0.00098058	-0.00246788	7.76954e-97	0.00185035	7.65373e-12	0.0025199	8.61751e-07	0.00870551	4.34451e-36	0.00406234	3.49629e-05	-0.00539651	0.000218787	0.00905771	4.86667e-11	0.00614593	4.9226e-05	-0.00121023	0.470958	-0.00154974	0.346531	1	0.867851
44409	SYTL4	0.117694	6.67366e-06	0.00410887	0.257979	-0.000362896	0.418131	0.0306842	2.42627e-05	0.000130858	0.0197781	-0.000517763	6.47825e-05	0.00196578	1.44378e-15	0.00123875	0.000187777	-0.0016665	0.000503539	0.00028557	0.684198	0.000702865	0.288405	-0.000179118	0.806756	0.00140975	0.0846968	0.00124879	0.116604	1	0.867851
43120	HDAC8	0.190329	5.9713e-18	-0.00347183	0.258004	-0.00136269	0.000312805	0.0134849	0.0279661	-0.000290099	8.28023e-10	0.000116989	0.285334	-2.27199e-05	0.91297	0.000292986	0.296377	-0.0011657	0.00393038	-0.00049188	0.399257	-0.00161278	0.00397973	-0.00103556	0.0936441	0.00068384	0.32165	-0.0017034	0.0113774	1	0.867851
51518	CD300C	-0.352541	2.93725e-174	-0.00196768	0.258026	0.00648635	5.55873e-200	0.00109226	0.753883	-0.00110412	0	-0.000147795	0.0198912	7.82108e-05	0.515912	0.000660339	4.85446e-05	0.000338151	0.142083	-0.00025299	0.462969	0.000168049	0.603877	0.00025138	0.48047	0.000747457	0.0579934	0.000480896	0.214414	1	0.867851
42948	DDA1	0.0791819	2.39359e-08	-0.00223343	0.25849	-0.000835807	0.000594845	-0.00163363	0.67915	-7.93927e-05	0.0088348	4.31278e-05	0.537345	0.000115818	0.384318	-0.000149634	0.406167	-0.000438647	0.0923014	3.12476e-05	0.933402	-0.00035438	0.325114	-0.000213273	0.591142	-0.000681519	0.124458	-0.00121135	0.00511641	1	0.867851
42820	BTLA	0.192824	7.11912e-10	-0.00491364	0.258636	-0.00111981	0.0368889	-0.00592478	0.496025	-0.000107585	0.107159	-0.000398515	0.0094239	0.000327132	0.263098	0.000363009	0.360413	0.000239435	0.676286	-0.00132205	0.109151	1.32895e-05	0.986651	-0.00105047	0.229925	-0.00105901	0.279316	-0.00035098	0.713204	1	0.867851
50510	WFIKKN1	0.46572	3.34625e-214	-0.00233584	0.258641	-0.00534685	1.4441e-97	-0.300757	0	-0.000442909	2.26001e-41	0.00102046	6.50289e-42	0.000444859	0.00181703	-0.00197576	2.16695e-24	-0.00153778	1.91903e-08	-0.000846255	0.0371746	-0.000730994	0.058187	-0.000453844	0.282825	-0.00100968	0.0312405	-0.000203727	0.658657	1	0.867851
49871	NDRG1	0.0994015	4.39027e-05	-0.00382916	0.258736	0.000705847	0.0906933	-0.0117026	0.0847764	-0.00028951	7.05568e-08	0.000246293	0.0459368	0.0003186	0.17361	-4.18113e-05	0.894602	0.000239494	0.593844	0.000651304	0.327406	-0.000684441	0.277989	-0.0001052	0.879364	-0.00238885	0.0019091	0.000661136	0.380952	1	0.867851
44414	TNN	-0.296177	2.36644e-80	0.00244521	0.258901	0.00464534	1.60717e-67	0.0824563	1.97119e-80	0.000180329	6.40866e-08	-0.000433357	1.92953e-08	0.000269409	0.0662694	-0.000374835	0.0580531	-0.00162891	1.19719e-08	-4.05759e-05	0.922064	0.000704067	0.0744735	0.000228696	0.600163	-0.00181661	0.000194115	0.00090339	0.0565217	1	0.867851
44480	APOA1	-0.222666	8.75736e-115	0.0015298	0.259569	0.00259672	3.22363e-54	0.162539	0	-0.000145271	3.55643e-12	0.000155533	0.00126874	-0.000740863	6.97855e-16	9.51547e-05	0.44348	-0.00044954	0.0119206	9.63702e-05	0.710907	-0.0009701	9.0843e-05	2.66299e-05	0.922556	-0.000773518	0.0113332	-0.000650777	0.0283718	1	0.868042
43355	CACYBP	0.076461	0.0376658	0.00576313	0.259966	-0.00254092	5.66752e-05	0.0416784	4.65878e-05	9.19727e-05	0.243329	-0.000314354	0.0836026	0.00186651	6.86684e-08	0.00130146	0.00556753	-0.00360146	8.78909e-08	0.000593194	0.546387	0.00177727	0.0568386	-0.00023425	0.82002	0.00141805	0.219666	0.000365531	0.743233	1	0.868042
51294	COL18A1	-0.543702	0	-0.00133162	0.260111	0.0100959	0	-0.0473719	8.78144e-89	-0.000507706	1.03728e-159	-2.33301e-06	0.957033	0.00066078	8.01677e-16	4.00258e-05	0.718412	-1.74992e-05	0.910991	-0.000345457	0.138927	-0.00018107	0.411483	-0.000345967	0.152879	-0.000737827	0.005857	0.000809489	0.00206867	1	0.868042
43232	EHD3	0.247565	2.5609e-09	0.00650289	0.260306	-0.00505179	1.36173e-12	-0.0690735	2.31979e-09	-0.000261092	0.00343899	3.6682e-05	0.859173	0.0015478	7.82938e-05	0.0011723	0.0267197	-0.00274565	0.00030757	0.00163018	0.14013	0.00113486	0.281465	-0.000685441	0.555985	0.00225747	0.0834824	0.00220907	0.0804233	1	0.868042
42820	TMOD4	-0.0187071	0.194434	0.00225322	0.26108	0.000579986	0.0190208	-0.0246138	8.54377e-10	9.84524e-06	0.749065	0.000115915	0.101331	0.000304426	0.0238596	0.000388925	0.0335156	7.46256e-05	0.777685	-0.000346581	0.362203	-0.00034874	0.340821	0.000579034	0.151078	-0.000396247	0.379816	0.000252532	0.56613	1	0.868042
44240	SARG	0.00579179	0.882541	0.00612522	0.261136	-0.000129078	0.847781	-0.0990333	1.11378e-19	0.000564685	2.03636e-11	-3.93509e-05	0.839518	0.00263605	9.77379e-13	0.000998114	0.045169	-0.00459128	1.68092e-10	0.00180324	0.0865684	0.000913454	0.357949	-0.0011748	0.284803	0.00197976	0.106325	0.000655145	0.583033	1	0.868042
51045	CXCL3	-0.0405676	0.230071	0.0052821	0.262002	-0.00123769	0.0327416	0.0807682	1.15749e-17	0.000361972	1.35805e-06	0.000459807	0.00757767	0.00120425	0.000219957	0.00111054	0.0117284	-0.00249264	6.52504e-05	-0.00137094	0.142242	0.000602201	0.493645	-0.00175774	0.0690351	0.0022265	0.0371845	0.00324701	0.00194751	1	0.868042
50116	IL15RA	-0.464267	3.19019e-300	0.00194172	0.262748	0.00874633	0	-0.0679864	5.66217e-85	-0.000560291	3.46913e-91	-0.000288489	5.38424e-06	0.000724984	1.58397e-09	0.000324003	0.0450503	0.000168368	0.463443	-0.000228576	0.501446	0.000373748	0.245965	0.000200944	0.570978	0.000746097	0.0581112	8.40841e-05	0.827013	1	0.868042
50116	CEP164	0.101053	6.9943e-06	0.00350602	0.26283	-8.79907e-05	0.819499	0.0225919	0.000317082	-0.00021511	1.60588e-05	0.000246575	0.0313006	-9.42687e-05	0.66382	-0.000706146	0.0155771	0.000507384	0.221155	0.000617717	0.314452	-0.000381727	0.511721	-0.000144845	0.821078	-0.00239075	0.000773807	-0.000986894	0.155529	1	0.868042
50678	NGF	-0.0167744	0.000110391	0.000676806	0.262894	0.000228268	0.00215801	0.00120612	0.319216	-4.98281e-05	2.14709e-07	7.09853e-05	0.00124356	2.64056e-05	0.526558	-8.42642e-05	0.136463	9.61862e-06	0.90429	7.41545e-05	0.53276	-0.000234311	0.0376915	-0.000165872	0.179536	7.06475e-05	0.606527	-0.000296507	0.0277576	1	0.868042
43602	VPS28	0.11097	2.94819e-06	0.00369341	0.263108	-0.000485392	0.233325	-0.0245514	0.000201495	-6.86721e-06	0.892528	-0.000611209	2.04197e-07	0.00117853	1.44942e-07	0.000143105	0.636293	-0.00255646	4.25567e-09	0.000495452	0.433109	0.000573531	0.34257	0.000196329	0.768275	0.000928565	0.211665	0.00034222	0.637709	1	0.868042
44300	AP3S2	0.132373	8.50604e-15	0.00265425	0.263316	-0.00068206	0.0197247	-0.0252306	1.05894e-07	-6.25529e-05	0.0876255	-0.000287045	0.000664623	0.000868343	6.25615e-08	6.02024e-05	0.781129	-0.00229434	2.1963e-13	0.000487804	0.282513	0.000547111	0.205987	0.000211701	0.657755	-0.000455697	0.393594	0.000437349	0.399232	1	0.868042
49867	PPM1A	0.0279827	0.0125509	-0.00174846	0.263411	-6.71791e-05	0.726672	-0.0089441	0.00426071	-5.81255e-05	0.0190258	-8.13257e-05	0.153564	0.000294367	0.00642798	-5.52179e-05	0.703893	-0.000815327	8.30351e-05	0.000280649	0.361126	0.000192752	0.506328	0.000142056	0.656579	-0.000135612	0.702318	-0.000292883	0.397849	1	0.868042
50913	CA2	0.0124144	0.625544	0.00396025	0.263684	0.00358783	1.99013e-16	-0.316223	0	0.000230595	4.11337e-05	-0.000711408	3.45122e-08	0.000982857	5.90264e-05	0.000226997	0.492156	0.000510025	0.276737	0.00154179	0.0278296	0.000281201	0.670137	0.00155194	0.032642	-0.00376125	2.93301e-06	0.000737822	0.349564	1	0.868042
42948	SLC12A2	0.0314413	0.00136386	-0.00152891	0.26373	-0.000500594	0.00296175	0.0157681	8.05761e-09	-6.54993e-05	0.00180205	8.34274e-05	0.084711	0.000157873	0.0866471	0.000182895	0.142393	-0.000456848	0.0113062	3.73288e-05	0.885315	-0.000221302	0.374627	-0.000228202	0.406274	-8.14522e-05	0.790779	-0.000327277	0.274439	1	0.868042
49871	MRPL46	0.0410976	2.8588e-05	0.00152922	0.263907	-0.000408827	0.015221	-0.00772846	0.00481037	-4.02536e-05	0.0633847	-0.000101269	0.0420687	0.00019162	0.0426523	-2.24537e-05	0.860114	-0.000127647	0.481416	-0.000111944	0.676715	0.000299342	0.239901	-0.000115419	0.68	0.000391482	0.207649	0.000440848	0.147872	1	0.868042
43445	CLEC3B	-0.0335542	1.46178e-05	0.00120324	0.264498	7.99378e-05	0.547113	0.0419098	5.67172e-84	0.000283271	3.62327e-65	0.000199701	1.8382e-07	0.000228812	0.00168741	3.87965e-05	0.694643	-0.00127484	2.46554e-19	0.000421527	0.0422856	0.00038004	0.0543303	-0.000509037	0.0195845	-0.000418719	0.0846986	0.00046356	0.0493313	1	0.868042
43602	GAS2	0.0961234	2.58988e-07	0.00289397	0.264618	-6.70851e-06	0.983281	-0.0484238	1.12762e-20	-0.000217339	5.3582e-08	-0.000262223	0.00456739	-0.000130695	0.458051	-8.07763e-05	0.734169	-0.000557937	0.102841	0.000813408	0.101579	0.000200664	0.672688	0.000296115	0.571835	-0.000756108	0.195706	-0.000326435	0.567689	1	0.868042
43195	SOWAHA	0.0423769	0.0154694	0.00271323	0.264658	-7.78446e-06	0.979312	0.0275472	1.51349e-08	-9.65031e-05	0.0101301	1.5442e-05	0.858367	0.000229402	0.163682	3.56446e-05	0.872729	0.00017069	0.594361	0.000822844	0.0750893	-0.000259526	0.559152	-0.000213761	0.662126	-0.00116167	0.0335649	-0.000255062	0.632399	1	0.868042
44448	AGT	-0.0219637	0.00584077	-0.00123477	0.264945	0.000239604	0.0795642	0.0601193	8.08925e-161	-0.000216497	1.27194e-36	-6.00201e-06	0.879276	2.8418e-05	0.705039	-8.68933e-06	0.931733	-0.000389424	0.00764656	5.68007e-05	0.788942	-0.000229888	0.25565	-0.000248285	0.265931	7.49709e-05	0.763519	-0.000510289	0.035476	1	0.868042
50999	SULT2A1	-0.158064	9.94978e-15	-0.00316751	0.265891	0.00661011	3.27339e-79	-0.190675	2.46419e-242	-3.679e-05	0.417108	-0.00080723	8.05908e-15	0.000853284	1.46272e-05	4.51179e-05	0.865627	0.000874389	0.0204982	0.000471485	0.400889	-0.000140242	0.791128	0.00147626	0.0112039	0.000192535	0.765458	-0.000840524	0.18419	1	0.868042
44329	GIGYF2	-0.187374	1.18754e-11	-0.00427119	0.265958	0.00432499	7.20676e-20	0.00792269	0.302477	0.000152019	0.0103129	-2.50511e-05	0.854441	0.00138618	9.64403e-08	0.000609257	0.0828005	-0.00331164	6.34751e-11	-7.86147e-05	0.914827	0.000482757	0.49115	-0.000366534	0.635624	-0.000446405	0.605561	-0.000643729	0.443796	1	0.868042
43434	HEG1	-0.252558	4.92981e-143	0.00152809	0.266229	0.00543339	7.95469e-223	-0.097285	1.75919e-270	0.000654371	1.47512e-207	-0.000505645	4.26863e-25	0.000590638	2.13304e-10	0.00138642	4.1901e-28	0.00172716	1.31025e-21	0.000461908	0.0805617	0.000692242	0.00573494	8.46202e-05	0.759634	0.000349409	0.260354	5.83742e-05	0.845644	1	0.868042
49108	AMY2A	-0.274502	1.98342e-56	-0.00268235	0.266616	0.0044386	2.30484e-50	0.032688	1.38387e-11	0.00124818	5.13093e-228	-0.00106654	4.26183e-33	0.00160229	1.79487e-21	-0.00254891	1.83201e-29	-0.00150249	2.64178e-06	0.000855433	0.0786365	-0.000726637	0.105269	-0.000865045	0.0808674	-0.0019984	0.000270201	4.28612e-05	0.93643	1	0.868042
50140	MTPN	0.0348082	0.00282498	0.00179921	0.267798	-0.000282915	0.156992	0.00975267	0.00272619	-8.46685e-05	0.00104219	1.21498e-05	0.837642	-8.21792e-05	0.464693	-0.000168924	0.265579	-0.000416503	0.0527436	0.00017573	0.581004	5.12722e-05	0.865185	-0.000199569	0.547419	-0.000254941	0.488277	0.000175279	0.627155	1	0.868042
43602	MTUS1	-0.0566032	0.0049403	0.00310195	0.267888	0.00332486	6.66129e-22	-0.171693	4.45202e-204	0.00011389	0.00825962	-0.000206714	0.0383	0.000696018	0.000250763	0.000724406	0.0047766	0.000829197	0.0246837	0.000763073	0.154682	0.00117481	0.0219214	0.00066569	0.238936	-0.000290994	0.644504	-0.000886075	0.150637	1	0.868042
50593	ADGRB3	-0.294338	2.67348e-134	-0.00183581	0.268211	0.00530472	5.86118e-148	0.0097622	0.00328704	-0.000638293	5.96552e-129	-0.000283927	2.46349e-06	-0.000341063	0.00284852	0.000656403	2.34279e-05	-0.00053759	0.0142767	0.000387026	0.234903	0.000452195	0.143681	-0.000277063	0.413512	0.00073368	0.0510813	-0.000795594	0.0313615	1	0.868042
44414	TWF2	0.140793	2.79681e-06	0.00462665	0.268288	-0.00146197	0.00456485	-0.0585827	2.47267e-12	-8.82406e-06	0.890926	-0.000362598	0.0148338	0.00157956	2.41487e-08	0.000538122	0.158527	-0.00375386	9.98046e-12	0.000837605	0.2953	0.000916009	0.229132	-0.000166435	0.843294	0.00135224	0.150549	0.000942868	0.302338	1	0.868042
44220	YARS1	-0.293168	2.02242e-08	0.00804268	0.268288	0.00310422	0.000533764	-0.0468182	0.00128272	0.000153429	0.171004	-0.000872904	0.00076882	0.0034203	3.75042e-12	0.00204377	0.00206458	-0.0040497	2.36498e-05	0.00194962	0.161808	0.00287978	0.0298971	-0.000587319	0.688951	0.00144554	0.37755	0.00153681	0.333581	1	0.868042
44300	ATXN3	0.0652496	0.00390337	0.00347809	0.268908	0.000754986	0.0515777	-0.165451	2.84493e-151	0.000278556	9.68842e-09	-0.000199462	0.0744115	0.00131273	6.82805e-10	0.00074817	0.0092049	-0.00101743	0.0141082	0.00170384	0.00463726	0.000619673	0.279959	0.00173686	0.00611876	-0.00177161	0.0123649	-0.000228606	0.739618	1	0.868042
44201	YJU2	0.0549793	2.14548e-06	0.00178194	0.268939	-0.000359883	0.0705042	-0.0265131	2.15425e-16	-3.59324e-05	0.148102	-0.000193771	0.000733709	0.000369718	0.000701538	0.000258271	0.0800671	-0.000716166	0.000760708	0.000367977	0.233412	-0.000100236	0.734001	-0.000305941	0.347663	-0.000216854	0.550766	0.000185862	0.598644	1	0.868042
42978	DNLZ	0.240032	4.24243e-14	0.00488414	0.269302	-0.00146331	0.00722887	0.102684	3.87929e-31	-0.000409175	1.95118e-09	5.71105e-05	0.716735	0.000296006	0.323104	-0.000754644	0.0613333	-0.00136389	0.0193427	0.000926726	0.26872	-0.000805023	0.319609	-0.000978108	0.271963	-0.00154165	0.120466	-0.00230291	0.0176536	1	0.868042
44480	CFI	-0.281879	4.76694e-283	0.00119658	0.269337	0.00446592	2.95963e-242	0.0501403	7.42374e-118	5.94281e-05	0.000365318	0.000141606	0.000237368	0.00100616	7.67973e-43	0.00078066	3.47803e-15	0.000363621	0.0108448	0.000216228	0.297566	0.000995453	4.89711e-07	-0.000135822	0.534549	-0.000244761	0.315523	6.76669e-06	0.977222	1	0.868042
43434	DCTD	0.025805	0.445584	0.00519571	0.26952	-0.00120679	0.037582	0.00737903	0.433011	0.000135828	0.0609126	-0.000523679	0.00173537	0.00174404	4.29284e-08	0.000847776	0.0494679	-0.00336778	5.31324e-08	0.000575622	0.524729	0.00130383	0.128545	-0.000515768	0.585955	0.00197396	0.0632685	0.0013027	0.204443	1	0.868042
44329	FKBP14	-0.101436	0.00416859	0.00543253	0.269615	0.0013939	0.0217053	0.0184965	0.0603456	2.07245e-05	0.784959	-0.000336863	0.0542588	0.00230166	4.89009e-12	0.00139842	0.00189347	-0.00261271	5.7332e-05	0.000807737	0.391227	0.000740827	0.409744	-0.000884411	0.372371	0.00254453	0.0216383	0.000967183	0.369328	1	0.868042
50678	LY96	-0.295224	9.4654e-117	0.001972	0.269651	0.00662433	1.25787e-197	-0.111692	7.18477e-212	0.000246185	4.37605e-18	-0.000383887	3.46624e-09	0.0002897	0.0187242	0.00147649	1.08439e-18	0.00195156	1.54651e-16	0.00102557	0.00350855	0.000783214	0.0187401	0.000381059	0.296763	0.000925253	0.0224598	-0.000307964	0.439234	1	0.868042
50439	LXN	0.0871758	0.000342486	0.00374289	0.269945	0.00197442	2.26527e-06	-0.167613	1.55125e-133	0.000298345	3.23231e-08	-0.000119124	0.335328	-0.000297304	0.204922	-0.000593592	0.0616125	0.000340357	0.448279	0.00119576	0.0733215	0.000691323	0.274701	-4.91089e-05	0.943523	-0.00173555	0.0240404	-0.000518794	0.493677	1	0.868042
43120	PDZK1	0.0111184	0.494773	-0.00249535	0.271274	0.00201401	5.70944e-13	-0.118745	5.26766e-150	2.56381e-05	0.46271	-0.000565946	2.7063e-12	0.000713277	3.44197e-06	0.00010465	0.613752	0.000944126	0.00157509	0.000488059	0.257712	-6.55127e-05	0.874218	0.000510146	0.263739	0.00102953	0.0434834	-0.00106871	0.0316546	1	0.868534
44329	MCEE	0.0664611	1.076e-05	0.00230872	0.271313	-0.000800547	0.00199426	0.0154827	0.000227626	5.93726e-05	0.0668238	-9.68849e-06	0.896723	0.000107147	0.450669	0.00014092	0.46293	0.000172099	0.534287	0.000406625	0.311522	-0.000403113	0.292919	-0.00054657	0.196148	4.37767e-07	0.999261	0.000344681	0.453164	1	0.868534
44402	C1RL	0.016426	0.0215722	0.00109233	0.272198	-0.00107608	1.7668e-18	0.0685831	4.49638e-257	-0.000198911	1.50215e-38	-0.000129824	0.000241488	0.000739645	4.3358e-28	-0.000121423	0.182541	-8.52222e-05	0.515562	-5.95211e-05	0.754702	0.000222856	0.220238	-0.000135824	0.498671	-0.000846165	0.000158071	-0.000340739	0.117638	1	0.868534
49507	LAMP2	0.0696273	1.54117e-22	0.0010904	0.272806	-0.00232149	3.43252e-80	0.104041	0	-0.000101705	1.2578e-10	3.38737e-05	0.347651	0.000212593	0.00189141	0.000675782	3.18604e-13	-4.31767e-05	0.742638	0.000292593	0.133176	6.23963e-05	0.735929	-0.000239347	0.238255	-5.5058e-05	0.806688	-0.000306852	0.165851	1	0.868534
49867	TPMT	0.254665	2.33101e-22	0.00399917	0.27324	-0.00355878	2.21055e-15	0.0214643	0.00330445	-0.000471302	3.89752e-16	-0.000562464	2.36741e-05	0.000557893	0.0269545	-0.000467493	0.168131	-0.000972762	0.0443003	0.00116497	0.104451	-0.000174827	0.79627	0.00050742	0.496328	-0.000518496	0.531388	-0.000415998	0.607004	1	0.868534
50791	LTBR	-0.362353	1.03891e-276	-0.00154544	0.27362	0.00728914	0	-0.0517364	1.57174e-74	-0.000624197	7.25935e-168	-5.7426e-05	0.267557	0.000718098	2.30433e-13	0.000197662	0.133989	3.74911e-07	0.998401	-0.000323894	0.246535	8.51745e-05	0.746533	-0.000319693	0.269358	-0.000157459	0.622718	0.000817957	0.00920712	1	0.868534
43517	UPK3BL1	0.0676298	0.000412646	-0.00291231	0.27383	-4.6038e-05	0.888547	0.00152703	0.774349	-5.20072e-05	0.204431	1.84552e-05	0.845675	-7.70584e-05	0.669627	-0.00055306	0.0233586	0.000355793	0.310636	0.000133489	0.793298	0.000665944	0.171615	-0.00013375	0.803422	-0.000183762	0.75919	0.000786781	0.179578	1	0.868534
44409	EHBP1	-0.00497075	0.853615	0.00409343	0.2744	0.00124139	0.00722738	-0.0260171	0.000517091	0.000113471	0.0499922	-0.00066977	5.39954e-07	0.00146991	7.06113e-09	0.000189373	0.579702	-0.00407877	1.5131e-16	0.000510593	0.480601	0.00118969	0.0813685	-0.000571527	0.449054	0.00110724	0.189071	-0.00022396	0.784893	1	0.868534
44329	MYCBP2	0.068287	0.00432528	0.00363284	0.274781	0.000699784	0.0882205	-0.0286465	1.6847e-05	0.00025121	9.9665e-07	-0.000333813	0.00477882	0.00115231	3.09671e-07	0.000304409	0.317109	-0.000715365	0.103129	-0.000141837	0.823746	-0.000532425	0.380788	-0.000114571	0.864259	-0.00149371	0.0460977	-0.00108273	0.137088	1	0.868534
51271	SORD	-0.0922115	0.000217075	0.00378991	0.275688	0.00431614	6.12135e-24	-0.280866	0	-0.000460042	8.98798e-17	-0.000746744	3.48113e-09	0.000916138	0.000131337	0.000823776	0.0110034	0.000459968	0.317481	0.00294	1.81939e-05	0.00103148	0.109836	0.00178337	0.012019	-0.000635357	0.420297	-0.000372635	0.6285	1	0.868534
43232	IGSF21	0.330725	1.05567e-120	-0.00213853	0.275789	-0.00347136	1.50895e-46	-0.197442	0	0.000212767	2.26795e-12	-4.82531e-05	0.49201	0.000695138	1.77253e-07	0.000267087	0.137253	-0.000223762	0.386534	-0.000504524	0.178878	0.000214089	0.549731	-7.70629e-06	0.984451	-0.00164296	0.00020869	-0.000483202	0.260248	1	0.868534
43602	CENPF	0.12334	6.42362e-10	0.0030201	0.276367	0.000272968	0.425278	-0.157503	1.94492e-175	3.35143e-05	0.432841	-0.000368726	0.000192492	0.000284962	0.130328	-0.000231073	0.363716	0.000252433	0.49014	0.00103604	0.0511946	0.000193827	0.702794	0.00164397	0.00333955	-0.00288232	4.00125e-06	0.00040829	0.503936	1	0.868534
51082	PILRA	-0.731332	0	0.0023029	0.276427	0.0130052	0	-0.0530612	6.95844e-36	-0.000301098	3.25585e-19	0.000579862	5.27168e-14	0.00276626	1.08079e-79	0.000401316	0.0418216	0.00111975	6.38984e-05	-0.000355743	0.395892	0.000275444	0.484475	0.00123093	0.0045647	0.000881544	0.0665913	0.000704829	0.134308	1	0.868534
50210	GGH	-0.198507	2.40127e-53	0.0019538	0.276969	0.00352846	3.53531e-57	0.00681894	0.05829	0.00109778	0	-0.000575027	2.68018e-18	0.000932	7.87843e-14	0.000298964	0.0754543	-0.000186071	0.434297	0.00103001	0.00345018	0.00142931	1.93581e-05	0.000367106	0.316044	-0.000820944	0.0437589	0.00030509	0.446012	1	0.868534
50999	BID	-0.046367	0.0566496	0.00368557	0.277281	0.00165442	7.34224e-05	-0.00635744	0.349629	-0.000340898	2.80718e-10	-0.000618572	5.86285e-07	0.00123869	1.29019e-07	0.000714681	0.0244803	-0.00198597	1.00323e-05	0.000560385	0.402068	0.00150089	0.0173713	-0.000211207	0.760714	-0.000521725	0.497496	-0.000991428	0.188647	1	0.868534
43195	CLGN	-0.102982	1.30912e-10	0.0024162	0.277877	0.00266526	3.21486e-22	0.00789966	0.0761688	-0.000160865	2.84298e-06	-0.000256689	0.0011943	0.000377603	0.0122688	0.000697165	0.00062068	0.00116742	6.94119e-05	0.000414713	0.327104	-6.68712e-05	0.86941	0.000509099	0.255597	-0.00049574	0.321806	0.000159212	0.744289	1	0.868534
43120	PRR5	0.0761301	4.45439e-06	-0.0025061	0.278051	-0.000728972	0.0104154	0.00118602	0.797331	2.14104e-05	0.54711	-3.66926e-05	0.656187	-4.40824e-06	0.977525	-8.54863e-05	0.685644	2.25668e-05	0.940877	-0.000448031	0.307716	-0.000585509	0.164842	0.000508709	0.273909	-0.000877534	0.0911126	-5.26269e-05	0.917262	1	0.868534
42948	TEF	0.0104623	0.493512	0.00230838	0.27824	6.41691e-05	0.806622	0.00430893	0.311114	4.49509e-05	0.168698	-7.00497e-05	0.352288	0.000498018	0.000515	-0.000190679	0.325736	-0.000896622	0.00140083	0.000176078	0.661986	-7.24756e-05	0.851788	-0.000587967	0.169157	0.000316993	0.507048	-6.92745e-05	0.88183	1	0.868534
43195	PGM2	0.124637	5.13938e-09	0.00321387	0.278264	-0.000463898	0.204769	-0.0127778	0.0311818	-6.27013e-05	0.170374	1.0369e-05	0.92167	0.000327431	0.102825	0.000277884	0.305456	-0.000189156	0.628198	0.000140904	0.802498	-0.000156847	0.772065	0.00040576	0.496088	0.000620389	0.351654	0.000180312	0.781399	1	0.868534
50140	GLO1	0.19222	1.4696e-19	0.00320101	0.279244	-0.00147348	5.23106e-05	-0.154391	1.70168e-148	0.000447979	1.77501e-21	-0.00132008	2.75945e-34	0.00191442	9.30155e-21	0.000626307	0.0234928	0.000871908	0.0260525	0.00129706	0.0253727	0.000957404	0.0818811	0.00102489	0.0899487	-0.000896572	0.181014	0.000705265	0.283435	1	0.868534
49867	ATG4A	0.206668	1.45967e-21	0.00326782	0.279346	-0.00146685	7.81696e-05	-0.157666	6.54679e-149	0.000148267	0.00196274	-0.000537937	1.03492e-06	0.000796524	0.000135498	0.000169856	0.545118	-0.000392078	0.32731	0.00117078	0.0486463	0.000482276	0.389468	0.00171298	0.0055222	-0.00135256	0.0485139	0.000842103	0.208347	1	0.868534
44414	COL15A1	-0.145681	1.77889e-49	-0.00147777	0.280277	0.00390032	1.97042e-117	-0.127876	0	-2.05236e-05	0.330088	0.000150142	0.00206628	0.000531595	9.83164e-09	0.000831408	2.9162e-11	-0.000276377	0.125852	-0.000113981	0.663648	-0.000510564	0.0406795	-0.000170892	0.535393	-0.000221447	0.472207	0.000468234	0.117801	1	0.868534
50678	TNFRSF6B	-0.743042	5.32619e-285	-0.00307714	0.280573	0.0153864	0	-0.151754	1.88456e-154	-9.01704e-05	0.0466282	-0.00057219	3.4608e-08	0.00158438	8.13663e-16	0.00197767	1.29645e-13	0.00418277	1.61019e-28	0.000999855	0.0745974	0.000233649	0.660443	0.00096287	0.0986193	-0.000163214	0.800864	0.000931795	0.142635	1	0.868534
51038	MEGF10	-0.176468	1.41612e-35	0.00212784	0.281209	0.00290789	5.42807e-33	0.0191886	1.22114e-06	0.000608442	2.83329e-83	0.000900877	1.11889e-35	-0.000366725	0.00728825	-0.000168082	0.362234	-0.00245162	7.14615e-21	6.7752e-05	0.862599	-6.17539e-05	0.866907	0.000132312	0.743957	0.000120719	0.787445	0.000488981	0.265581	1	0.868534
50999	SELPLG	-0.13826	9.00135e-44	0.0014945	0.2817	0.0020314	1.35579e-32	0.00809049	0.00363324	-0.00117049	0	-0.000926689	1.72495e-74	0.000267215	0.00537519	-0.00117549	1.60292e-19	3.32045e-05	0.856798	0.000737595	0.0070407	0.000637859	0.0135019	0.000580668	0.0407697	-0.000499446	0.11252	-0.000456078	0.139488	1	0.868534
43195	PRKAG3	0.0284994	0.0118378	-0.00169384	0.28175	-0.000274457	0.157594	0.0105583	0.000797353	-7.57071e-05	0.00182036	0.000114944	0.0400512	-3.93042e-05	0.712227	-1.56112e-05	0.91364	-0.000242185	0.242837	1.49878e-05	0.960031	-0.000694566	0.0156811	0.000122996	0.697534	-0.000517523	0.143324	-0.000163316	0.635897	1	0.868534
49871	SLC16A1	0.220696	1.76979e-26	0.00310653	0.281911	-0.00141859	6.53262e-05	-0.0935399	9.85521e-59	-0.000594526	1.40723e-38	-0.000115096	0.27333	-0.000122736	0.538153	0.000264386	0.325204	-0.000895947	0.0191383	0.000950531	0.0932426	0.000487487	0.364183	0.000705623	0.231873	-0.00229891	0.000451402	0.000634206	0.323631	1	0.868534
50116	EIF5A	0.0203076	0.0578488	0.00160334	0.282177	-0.000103049	0.574618	-0.014117	2.29556e-06	-5.79444e-05	0.0146654	-4.75059e-05	0.383598	5.50915e-05	0.593704	8.70636e-05	0.531106	-0.000227304	0.249678	0.000278468	0.340899	-0.000290633	0.29408	1.77216e-05	0.953658	-0.000299794	0.375905	0.00038366	0.246208	1	0.868534
42948	NECAP2	0.0320299	0.17842	0.00356606	0.282266	0.000922939	0.023823	0.0285064	1.70003e-05	9.99056e-05	0.0495653	-0.000329231	0.00501304	0.0013073	4.88221e-09	7.13547e-05	0.813378	-0.000836929	0.0555994	0.00244771	9.58728e-05	0.00153732	0.0109616	0.00112891	0.0901534	0.00108874	0.143549	0.00103645	0.1534	1	0.868534
44201	KIR2DL2	-0.927842	6.31068e-197	-0.00460666	0.282332	0.0171201	3.63752e-227	-0.0541672	2.73405e-10	-0.00083118	2.94346e-36	-0.00126027	1.47169e-16	0.00174858	1.65426e-09	0.000608528	0.120818	0.00209616	0.000209868	0.00155281	0.0585499	0.00484721	6.4033e-10	0.00286782	0.000928401	0.00326121	0.000738228	-0.000834555	0.37397	1	0.868534
51505	HBQ1	0.298523	1.43131e-41	0.00331223	0.282375	-0.00210357	2.79027e-08	-0.245651	0	0.000571778	1.6856e-31	4.14144e-05	0.71158	-2.47115e-05	0.907379	-0.000425053	0.139169	6.25154e-05	0.878093	0.000801574	0.187842	-0.000698384	0.222294	0.00206864	0.00102049	-0.00352056	4.66767e-07	0.00215449	0.00160681	1	0.868534
43434	YWHAQ	-0.0560496	0.0341669	0.003953	0.282833	0.00201574	8.998e-06	-0.0316449	1.7223e-05	6.79066e-05	0.230972	-0.000561947	1.73426e-05	0.00152196	9.86334e-10	0.000297393	0.378298	-0.00269046	2.75335e-08	0.000892367	0.207442	0.00092767	0.166826	0.000367573	0.619694	0.00121536	0.143757	0.000428925	0.593227	1	0.868534
43195	LRP2BP	0.127323	1.44607e-05	0.00437761	0.283281	0.000694951	0.167528	0.0718054	1.44648e-18	-0.000384631	1.00191e-09	0.000231297	0.11103	-0.000159641	0.563355	-0.000391289	0.294445	-0.000203685	0.704789	-0.000367218	0.635792	-0.000276909	0.710217	-0.000230772	0.778512	7.19032e-05	0.937487	0.000416663	0.641299	1	0.868534
42948	MYOM2	-0.0713826	7.17539e-05	-0.00268708	0.28338	0.00421684	1.82887e-42	-0.195368	0	0.000521799	6.41371e-42	0.000353937	6.49223e-05	0.000277167	0.10042	0.000260312	0.254167	-0.00184062	2.50412e-08	0.00060777	0.199653	-0.00145956	0.00138471	-0.000253567	0.614281	-0.00125411	0.0256931	0.000326637	0.551364	1	0.868534
50678	CSF2RA	-0.28742	1.1135e-39	-0.00325673	0.28338	0.00477892	2.161e-37	-0.0432017	1.22326e-12	-0.00101697	3.22369e-98	0.000597951	6.12211e-08	2.3683e-05	0.909952	0.000518635	0.067998	0.00233967	5.77339e-09	-0.00089032	0.13587	0.000577934	0.307385	-6.38591e-05	0.918046	-0.000561954	0.414627	0.000594823	0.379332	1	0.868534
42948	NXPE4	0.0544979	8.06295e-06	-0.00182339	0.283752	-0.000543796	0.00942727	0.0137679	5.11836e-05	-9.83877e-06	0.706133	2.62027e-05	0.663227	0.000100481	0.380483	-4.53827e-05	0.769723	0.000140517	0.530917	-8.55819e-05	0.790286	-0.000236946	0.444575	-0.000254241	0.456822	-0.00020852	0.584927	0.000124585	0.737938	1	0.868534
43434	ACHE	-0.01106	0.351818	0.00177012	0.284028	0.00245075	2.91187e-33	-0.199082	0	-1.99368e-05	0.433377	-3.52697e-05	0.547978	-0.00064568	7.6498e-09	0.000733228	1.30953e-06	-2.38095e-05	0.91276	4.29675e-05	0.89244	-0.000503357	0.094716	-0.000123723	0.709804	-0.00128079	0.000599531	-0.000328026	0.362815	1	0.868534
44201	NUBP1	0.154714	8.97233e-06	0.005186	0.28405	-0.000629672	0.292028	-0.0065985	0.495963	-0.000420997	1.68968e-08	0.000279253	0.105153	-0.000620007	0.0584399	0.000521108	0.239643	-0.00139324	0.0291928	-0.000330495	0.721578	-0.00116959	0.186774	-0.00148351	0.129455	-0.000424781	0.697185	0.000978561	0.356156	1	0.868534
51076	AK1	-0.113863	8.71463e-07	0.00345258	0.284422	0.00500802	1.9877e-36	-0.24825	0	0.000580684	1.44682e-29	-0.000769479	6.9024e-11	0.00119863	8.2282e-08	0.000244422	0.419669	0.000406702	0.341007	0.00153085	0.0166049	0.000971619	0.106662	0.00259741	8.61658e-05	-0.00170109	0.0199959	0.00166639	0.0205293	1	0.868534
43120	TRAF3	0.0786069	3.10289e-09	0.00197682	0.284531	5.06079e-05	0.823961	-0.0695936	6.36529e-79	-4.84471e-05	0.0883707	0.000131944	0.0452554	-0.000269797	0.0310421	0.000412247	0.01463	-9.26724e-05	0.703233	-0.000225751	0.520314	-0.00055671	0.0985671	-0.000150953	0.684682	-0.00146781	0.000408441	-0.000642447	0.112702	1	0.868534
51082	CD99	-0.226691	4.54276e-229	0.00104036	0.28456	0.00623033	0	-0.2326	0	-0.000138998	2.21605e-19	3.2566e-05	0.357546	0.00082152	2.13735e-34	0.000182125	0.0444015	-0.0013136	1.91783e-24	0.000441974	0.0216986	-0.000461474	0.0107972	-4.96143e-06	0.980149	-1.253e-06	0.995472	0.000676203	0.00176971	1	0.868534
43120	SPRED2	0.138866	1.77713e-18	-0.00235798	0.284749	-0.00156285	8.63675e-09	0.00109178	0.804309	7.48755e-05	0.0273208	-0.00017097	0.029697	0.000480405	0.00129229	0.000161289	0.42345	-0.00201587	3.85815e-12	0.000136186	0.745199	-0.000536653	0.182092	-0.00057116	0.197907	0.000967188	0.0509642	-0.000485093	0.315559	1	0.868534
42948	EXOSC10	0.190625	3.1363e-19	-0.00316781	0.284807	-0.00103366	0.00459341	0.0348946	3.74645e-09	-0.000232659	3.05224e-07	9.66464e-05	0.356277	-0.000235459	0.237871	0.000124554	0.644485	-0.00021019	0.590349	0.000962331	0.0858946	-0.000199507	0.711606	-0.000298857	0.615417	-0.0011031	0.0970094	-0.000780827	0.228445	1	0.868534
42978	DOCK9	0.21789	1.72899e-07	0.00620477	0.284838	0.00243644	0.000653506	0.0371127	0.00137951	-0.000845109	3.57954e-21	0.000455503	0.0274299	-0.00119328	0.00240108	0.000136506	0.796449	-0.00125402	0.101236	-0.000130181	0.905745	0.000555148	0.600929	-0.000950167	0.416046	-0.0012248	0.347116	0.00151133	0.235313	1	0.868534
44329	PDLIM5	-0.043431	0.304013	0.0062777	0.285136	-0.00111108	0.125258	0.0156856	0.182019	-0.000235255	0.00945692	-0.000783076	0.000177811	0.00232644	4.87743e-09	0.000486818	0.364874	-0.00562397	4.01583e-13	0.00142549	0.204877	0.00143695	0.180351	-0.000684821	0.56277	0.00199077	0.13219	-0.00116023	0.366897	1	0.868534
44001	ASAH1	-0.21804	5.50693e-39	0.00247674	0.285585	0.00488236	4.32078e-65	-0.0562324	9.71489e-34	0.000411315	1.1049e-30	-0.00065008	3.0021e-15	0.000717143	4.7475e-06	0.000853176	5.60094e-05	-0.000124303	0.684509	0.000170748	0.699792	0.00157052	0.000203066	9.43535e-05	0.839854	0.000224617	0.666625	-0.000579195	0.253462	1	0.868534
51228	SEZ6L	-0.378038	6.39567e-303	-0.00150368	0.285659	0.00515032	5.96938e-193	0.166376	0	0.000425937	7.41367e-81	-0.000928759	1.80156e-72	0.000458185	2.63065e-06	-8.37477e-05	0.524053	0.00106104	1.239e-08	4.36763e-05	0.87571	0.00109608	2.81799e-05	-0.00037772	0.189799	0.000554127	0.0823256	-9.1819e-05	0.768988	1	0.868534
43602	ITGAX	-0.0298299	0.112485	0.00278638	0.286307	0.00110133	0.000637538	0.0256739	9.15647e-07	1.91039e-07	0.996213	8.55189e-05	0.358497	-4.93179e-06	0.977823	-0.000204932	0.392403	0.00053646	0.119463	8.81409e-05	0.860196	6.80309e-05	0.886934	-0.000406099	0.441481	-0.000292867	0.618819	-0.000203563	0.723514	1	0.868534
51038	LAIR1	-0.891794	0	-0.00214919	0.286363	0.015986	0	0.0204038	4.33195e-07	0.000272823	1.83319e-17	0.000672088	7.9259e-20	0.00155663	7.12883e-29	0.00109313	6.50586e-09	0.00111617	2.90568e-05	-0.000664119	0.096578	-0.000157575	0.675311	-0.00085264	0.039243	-0.000336059	0.462202	0.000707772	0.114468	1	0.868534
51122	NME3	0.0403323	1.40716e-06	0.00124163	0.28669	-0.000718939	5.3079e-07	0.0214783	3.65774e-20	-0.00010408	1.97534e-08	6.14e-05	0.149289	-5.64747e-06	0.944138	0.000676429	5.40359e-10	0.000195714	0.204879	0.000654626	0.00464471	8.73193e-05	0.688276	0.000440269	0.0657604	0.000534478	0.0432468	-0.000195682	0.450369	1	0.868534
42978	KRT8	-0.234242	8.61564e-20	-0.00381285	0.286694	0.00695341	7.21806e-56	-0.121711	1.17766e-64	0.000233337	2.34894e-05	-0.00106064	8.69464e-17	0.00193898	1.31254e-15	0.000361078	0.268703	0.00191886	4.80387e-05	-0.000352189	0.603563	0.0011002	0.092879	-8.48279e-05	0.906302	0.00214836	0.00751092	0.00183694	0.0193721	1	0.868534
51082	PAMR1	-0.442873	0	0.00154708	0.286816	0.0077447	0	-0.00952813	0.00106169	0.000237291	8.24374e-25	-0.0003184	1.74572e-09	0.00128542	1.48e-37	-0.000363244	0.00728319	-0.000118912	0.536224	8.01008e-05	0.780647	0.000342641	0.205188	-7.53223e-05	0.800394	-0.000528957	0.108827	-0.000680396	0.0352381	1	0.868534
51631	TNFSF10	-0.105096	2.41796e-29	0.0013875	0.286889	0.00178424	8.77218e-29	-0.00779168	0.00280748	0.000191697	2.38826e-20	3.2039e-06	0.94625	0.000349053	0.000106723	-0.000452975	0.000193832	0.000178946	0.299124	-0.000288167	0.263309	0.000123799	0.608433	0.000104315	0.694942	-7.09076e-05	0.810206	2.49631e-05	0.931122	1	0.868534
44480	CFD	-0.282921	0	0.00108737	0.287239	0.00570515	0	-0.0591374	1.55851e-182	0.000145217	2.72642e-20	3.25023e-05	0.37107	0.000796347	1.09025e-30	0.000409637	1.18342e-05	-0.00030875	0.0218228	0.000553831	0.00467605	-5.27882e-05	0.777292	-9.48971e-05	0.645475	-7.85975e-05	0.732569	0.000383242	0.0864609	1	0.868534
43232	INPP5D	0.0388343	0.0638156	0.00309378	0.288256	0.00145944	4.88194e-05	-0.163494	1.64872e-171	0.000112565	0.0123814	-0.00055361	1.1023e-07	0.00148492	5.82956e-14	0.000803817	0.00259214	-0.000184343	0.630872	0.0015911	0.00430043	0.000376546	0.478556	0.00116596	0.0470258	-0.00145331	0.0271381	-0.00177123	0.00544426	1	0.868534
51206	EPHA1	-0.275544	1.39411e-110	-0.00182052	0.288479	0.0072021	1.2177e-252	-0.277254	0	-0.000486739	1.04804e-70	-0.000441565	1.95086e-12	0.00116827	7.8042e-23	0.000505959	0.00161274	0.000565869	0.0127109	-0.000829913	0.0147863	0.000378812	0.237001	-0.000278043	0.429705	-0.00177073	5.32027e-06	0.000958691	0.0120499	1	0.868534
42820	STOML2	0.187264	1.41237e-08	-0.00486894	0.288861	-0.00152335	0.00714319	-0.000430967	0.962577	-0.00025585	0.000283242	0.000246776	0.127655	-9.0728e-05	0.768686	0.00096418	0.0213524	-0.00162528	0.00724352	-0.000481812	0.580111	-0.00126838	0.130267	-0.00216203	0.0192195	-0.000948962	0.358313	-0.000468557	0.641972	1	0.868534
44480	ITIH4	-0.132011	7.49989e-46	0.00136897	0.289003	0.00118531	9.63347e-14	0.155714	0	-0.000419588	1.79484e-98	0.000369701	8.34736e-16	-8.76934e-05	0.315195	5.23896e-05	0.657457	0.000120064	0.480295	0.000409841	0.0976077	0.000184614	0.433716	-0.000540129	0.038242	-0.000380801	0.190127	0.000294725	0.296767	1	0.868534
43120	NEDD4L	0.11486	4.12896e-11	0.00256873	0.289191	-0.00195774	5.48333e-11	-0.0748702	9.82984e-54	4.79571e-05	0.198564	-1.38298e-05	0.872914	0.000870326	1.14907e-07	-3.77702e-05	0.864625	-0.000484569	0.128963	0.00117533	0.0107464	0.000802354	0.0696024	0.000827591	0.089732	-0.000104526	0.847856	-0.000290999	0.58397	1	0.868534
49867	ACAA1	-0.0400946	0.178969	-0.00440979	0.289231	0.00352843	5.32092e-12	-0.169	3.47764e-91	0.000368382	2.3573e-08	-0.00118148	6.83665e-15	0.00163963	1.18031e-08	0.00115268	0.00287334	0.00131478	0.0170962	0.00118555	0.147204	0.00077321	0.316508	-0.000139104	0.870048	0.00263873	0.0052041	0.000729165	0.429012	1	0.868534
50999	METAP1D	0.0699001	0.0175289	0.00434842	0.289275	-0.00024488	0.62753	-0.0547919	2.68876e-11	0.000518354	2.19195e-15	-0.000422075	0.00482826	0.00216306	2.50456e-14	0.00113696	0.00309177	-0.000790905	0.145897	0.00197155	0.0148059	0.00194779	0.0107086	-0.000806168	0.33656	0.0017367	0.0619055	0.00199077	0.0290936	1	0.868534
50836	DNAJB1	-0.0594197	0.0582274	0.00463186	0.289364	0.00311378	7.18539e-09	-0.226846	5.92655e-147	0.000807633	2.65929e-31	-0.00187768	5.37298e-32	0.00192457	1.98143e-10	0.00108231	0.00790972	-0.00174168	0.00263543	0.00197291	0.0252812	0.00135224	0.0956032	0.00105676	0.239183	0.00232813	0.0189858	0.000340537	0.726052	1	0.868534
50116	IL10RA	-0.000858232	0.967268	-0.00308425	0.289618	0.00178313	6.6711e-07	0.0193742	0.000900568	-0.000295193	1.97631e-10	-0.000154319	0.147402	0.000111524	0.580401	-0.000546755	0.0440816	8.16683e-05	0.832333	0.0013131	0.0215177	9.46241e-05	0.861189	-0.000325074	0.5853	-9.81592e-05	0.882023	-0.000500964	0.438297	1	0.868534
42948	IGF2BP3	0.153351	1.88074e-20	0.00243891	0.289823	-0.00156667	3.36915e-08	0.00861286	0.0613915	-0.000304837	6.64143e-18	0.000231417	0.00452306	-0.000210777	0.174413	0.000203296	0.332987	-0.000757086	0.01269	-0.000375594	0.388882	-0.000508606	0.225715	-0.000166276	0.719394	-0.00105177	0.041962	0.000291883	0.562785	1	0.868534
50999	TBC1D5	0.122906	2.06487e-05	-0.00425526	0.290425	-0.000490052	0.322231	0.0341344	2.31564e-05	0.000187081	0.00351702	-0.000766852	1.79336e-07	0.00125657	6.34399e-06	-0.00037613	0.318375	-0.00320918	1.80652e-09	0.000388686	0.624253	0.00132071	0.0777065	-0.000313613	0.703117	-0.000913389	0.316815	-0.000468692	0.600435	1	0.868534
51076	CD2AP	0.126783	5.89039e-08	0.00344353	0.290508	-0.000330341	0.410049	-0.1306	9.66031e-89	4.68319e-05	0.366979	-0.000457951	0.000121103	0.00142079	3.12789e-10	0.000823625	0.00709892	-0.00164351	0.000139377	0.0010293	0.110811	0.000752386	0.216118	0.00146885	0.0279128	0.000795577	0.281375	0.000587042	0.419106	1	0.868534
50914	ALDH3A1	0.0260322	0.279876	-0.00354995	0.290593	0.00472497	3.05695e-30	-0.362097	0	-0.000169474	0.00153494	-0.000516183	2.62921e-05	0.000135635	0.559572	0.00112457	0.000349047	0.00122535	0.00595216	-0.000369122	0.577082	0.000329936	0.597285	0.000908842	0.185536	0.000286338	0.707184	-0.000809326	0.278373	1	0.868534
50999	GOPC	0.0227456	0.529997	0.00532676	0.291579	-0.000806826	0.194011	-0.054399	7.673e-08	2.51689e-05	0.75434	-0.000739705	6.00463e-05	0.00161616	3.70304e-06	0.000802286	0.0898639	-0.00443836	3.3892e-11	0.00148952	0.134671	0.00125431	0.181796	-0.000210045	0.838805	0.00134208	0.241129	0.000530071	0.636871	1	0.868534
50116	LAP3	-0.195451	2.59519e-29	0.00255205	0.291626	0.00367227	7.75086e-35	-0.0267883	3.31331e-08	-8.78954e-05	0.0225676	-0.00045191	3.30057e-07	0.000755782	6.53736e-06	0.000552229	0.0143931	-0.000480688	0.133695	0.000424463	0.371142	0.00020453	0.649193	0.000413179	0.403887	0.000751917	0.171261	-0.00012942	0.809567	1	0.868534
50999	CLEC4G	0.0502686	3.13386e-05	0.00177514	0.291691	0.000105493	0.610419	-0.102658	1.29356e-201	-0.000230054	9.67033e-18	-0.000196302	0.00139947	2.78796e-05	0.810714	-0.000472274	0.00274186	-0.002277	2.00021e-24	-0.000277411	0.403244	-0.00152615	1.09679e-06	-0.000529363	0.12404	-0.00164497	1.63362e-05	5.8406e-05	0.875992	1	0.868534
50836	DTX3	-0.669073	0	-0.00126466	0.292084	0.0125905	0	-0.0782198	1.06216e-229	-0.000249309	4.2321e-39	0.000148923	0.000667042	5.30193e-05	0.523143	0.000721493	1.1416e-10	-0.000237126	0.135902	-5.25124e-05	0.828317	-0.001247	2.18914e-08	0.000379213	0.123987	-0.000390962	0.151372	0.000527423	0.0481156	1	0.868534
43232	HRC	-0.105675	2.48428e-17	0.00182626	0.292351	0.00262542	1.44415e-34	-0.0173758	5.57026e-07	-0.000160527	2.09644e-09	0.000208548	0.000780355	9.06621e-05	0.440922	-0.000468754	0.00316973	-0.0011923	1.79477e-07	-0.000277431	0.402991	-0.00141885	7.30422e-06	-0.000379068	0.278093	0.00067343	0.0854703	-0.000608499	0.108714	1	0.868534
47749	CTSD	-0.483077	3.11841e-223	0.00220883	0.292881	0.011191	0	-0.146813	1.4672e-263	4.82047e-05	0.147429	-0.000288295	0.00018077	0.000590706	5.18399e-05	0.00156755	1.48082e-15	0.001214	1.28533e-05	3.25274e-05	0.937869	0.00141707	0.00028971	-0.000102525	0.811614	4.56237e-05	0.923542	-0.000296158	0.527066	1	0.868534
44220	GPHA2	-0.206967	8.44895e-36	-0.00241646	0.293872	0.00437044	2.67813e-53	0.104133	1.78989e-112	-0.000546746	2.40283e-53	0.000186388	0.0234021	9.52959e-06	0.951284	-0.000729852	0.000516628	-0.000244182	0.421118	-0.000747751	0.0903889	-0.00149785	0.000365006	-0.000533663	0.251045	-0.00171831	0.00093267	0.000614365	0.22251	1	0.868534
49956	CD207	-0.154726	9.77199e-29	-0.00203243	0.294018	0.00323283	8.06676e-42	-0.0484397	1.11623e-35	-0.00071448	8.01243e-119	5.57052e-06	0.937405	0.000975689	4.02434e-13	-2.4497e-05	0.891765	0.00104572	4.53195e-05	0.000450119	0.248142	-0.000867	0.0156125	0.000712794	0.0728196	0.000836138	0.0576876	0.000456256	0.2892	1	0.868534
42820	CLASP1	0.174004	2.17041e-11	0.00379081	0.294208	-0.0011941	0.00739417	-0.0169871	0.0188154	-0.000192593	0.000518237	0.000132496	0.29881	-0.000211235	0.384433	0.000505184	0.125542	-0.00187475	8.33378e-05	1.89944e-06	0.99779	-0.00105471	0.110003	-0.000294259	0.68564	-6.62843e-05	0.935042	-0.000109959	0.889768	1	0.868534
49871	CLSTN1	-0.101253	4.33167e-08	0.00270078	0.294511	0.0014133	8.2997e-06	0.0819018	1.30258e-56	-0.000149533	0.000248547	0.000144458	0.123408	5.37832e-05	0.762436	0.000219024	0.361094	-6.22848e-05	0.855182	-0.000411875	0.415059	0.000249803	0.60233	-0.000100314	0.848952	-0.000332741	0.569357	0.000448607	0.434011	1	0.868534
50064	TNF	-0.507127	2.38826e-294	-0.00200533	0.294533	0.0093533	0	0.0168493	1.11164e-05	7.68535e-05	0.0114904	3.1213e-05	0.654815	0.000991057	7.08061e-14	0.000296389	0.0973934	0.00112344	9.32437e-06	0.000143402	0.702109	0.000412591	0.246133	0.000703216	0.0718657	0.000383694	0.375965	0.000783181	0.0653432	1	0.868534
49490	ENPP7	-0.639541	4.6615e-92	0.00457659	0.295015	0.0113773	7.23114e-99	-0.0591258	1.47295e-11	0.000989276	1.32338e-45	-0.000240472	0.133305	0.00149368	8.34676e-07	0.00290297	1.40555e-12	0.00239168	3.67592e-05	-0.0013002	0.129977	-0.000414119	0.612586	0.00242025	0.00697232	0.000751656	0.448902	0.000268241	0.783141	1	0.868534
50782	TGFBI	0.0169843	0.0777166	-0.00140487	0.295111	0.000790776	1.67682e-06	-0.110264	0	0.000301246	2.8027e-45	0.000360759	2.61918e-13	-0.000212127	0.0229645	0.000161927	0.198025	0.000501027	0.00480749	-0.000911937	0.000557369	-0.000199729	0.425432	-0.000929052	0.000718245	-0.001581	1.97586e-07	-0.000110861	0.710197	1	0.868534
44135	CDC26	-0.0422359	0.0927994	0.00365596	0.295256	0.0013348	0.00195826	0.0293265	2.73836e-05	1.21362e-05	0.821778	-0.000428263	0.000595302	0.00145423	7.9589e-10	0.000382694	0.229928	-0.00388161	3.63024e-17	4.12808e-05	0.950849	0.000800679	0.209073	-5.34105e-05	0.939647	0.00170439	0.030457	-0.000240724	0.752834	1	0.868534
43120	TYRP1	-0.0660075	0.00272214	0.00321004	0.295264	0.000244925	0.516725	0.0305823	6.11416e-07	-0.00173648	1.01101e-291	0.00176068	4.26959e-58	1.26585e-05	0.951407	-0.000163377	0.560062	-0.00327333	5.44338e-16	-0.00263442	6.2524e-06	-0.0013619	0.0149449	-0.000761993	0.216991	0.00102733	0.136217	-0.00127637	0.0577065	1	0.868534
43602	MTHFSD	0.262713	7.82731e-11	0.00587509	0.295409	-0.00342456	7.73675e-07	-0.0692669	7.11996e-10	-0.000493336	1.17046e-08	0.000159676	0.424912	0.000692949	0.0691019	0.00142135	0.00576906	-0.00030303	0.682291	0.000436199	0.684996	0.00150764	0.142523	0.000863217	0.446392	0.00111819	0.376656	-9.43324e-05	0.939182	1	0.868534
43120	SMPD3	0.154982	1.11713e-13	-0.00304012	0.295462	-0.000521485	0.145086	-0.0291255	5.34681e-07	-0.000400511	3.52266e-19	0.00020246	0.0508175	-1.44962e-05	0.941283	-0.000218061	0.411681	-0.00110157	0.00399643	7.65385e-05	0.889807	-0.00152945	0.00391831	-0.000809011	0.166531	0.000264798	0.685209	-0.00190548	0.00278579	1	0.868534
43434	TNFRSF17	-0.354455	1.51611e-130	-0.00211386	0.295627	0.00679106	4.61772e-162	-0.0458869	8.0565e-30	0.00108141	7.71049e-261	-0.000550974	1.72116e-14	0.000839598	8.26374e-10	0.000348373	0.0601835	0.00149769	1.77381e-08	0.00171037	1.08424e-05	0.00113157	0.00213465	0.0014758	0.000285235	0.00102233	0.0251278	0.00128232	0.0036372	1	0.868534
43120	DGKA	0.0303911	0.12001	0.0028473	0.295652	0.000508668	0.129281	-0.0190858	0.000453834	2.6329e-06	0.949901	-0.000351234	0.0002992	0.00120973	5.42023e-11	0.000624227	0.012138	-0.00169854	2.17313e-06	0.000635907	0.219234	0.000387618	0.435206	9.75338e-05	0.858713	0.000130401	0.83128	-1.388e-05	0.981451	1	0.868534
44220	SH3BP1	0.0257573	0.142684	-0.0025502	0.296601	0.00166925	3.0776e-08	-0.0522064	1.40941e-26	8.72453e-05	0.0206297	-1.7786e-05	0.838498	-0.00016094	0.33097	0.000214956	0.335277	-0.000408573	0.204692	-0.000886329	0.0586001	-0.000376777	0.398222	-0.000482512	0.328157	-0.00116531	0.034416	0.000516218	0.334157	1	0.870111
51076	PPP1R2	-0.126568	9.92362e-06	0.00416209	0.296995	0.00273544	2.58034e-08	-0.0129359	0.105666	-0.000112354	0.0772703	-0.000349757	0.0165488	0.00168247	1.18233e-09	0.000766974	0.0407055	-0.0030106	1.22928e-08	0.000633297	0.423202	0.00114575	0.124145	-0.000157021	0.847855	0.00170785	0.059068	0.000841287	0.344552	1	0.870111
51706	CDH5	-0.0647427	1.73424e-09	0.00156321	0.297082	0.00200958	1.23321e-27	-0.0399392	2.37241e-40	6.43175e-05	0.00691523	-0.000128314	0.0192906	0.000845167	4.30158e-16	-0.000377068	0.00722533	0.000102165	0.606565	0.000994179	0.000808176	-0.000269758	0.33392	0.00122479	6.6554e-05	-0.000523266	0.123516	0.000416091	0.211812	1	0.870111
42978	CDKL5	0.133294	1.4009e-12	0.00272427	0.29807	-0.00144545	7.44304e-06	0.0318702	1.15482e-09	-0.000165271	4.23106e-05	5.04343e-05	0.58843	-1.46366e-05	0.934239	-8.92785e-05	0.708523	-9.54169e-05	0.782287	-0.000101642	0.837678	-0.000590764	0.217408	-0.000948958	0.0718713	-0.00138824	0.0182054	-0.000552408	0.336426	1	0.87213
50836	RET	0.622255	0	-0.00209582	0.298775	-0.0108092	0	-0.0197723	9.96388e-07	0.000502402	2.01749e-55	-0.000346273	2.49698e-06	0.00167052	5.47816e-33	0.00185114	7.49076e-23	-0.00121309	5.63518e-06	0.000172468	0.671663	0.00200312	8.79677e-08	-0.000505298	0.222532	4.39292e-05	0.92357	0.000249023	0.578667	1	0.872397
50923	CA6	0.957617	0	-0.00331552	0.300688	-0.0124716	1.80514e-217	-0.477566	0	0.000451301	7.06298e-19	-0.00115659	3.28094e-23	-0.000975576	1.00734e-05	-0.000880972	0.00317523	0.000541631	0.201579	0.00143323	0.0237077	-0.000805564	0.176653	0.00121308	0.0646847	-0.000858771	0.238862	-0.00034844	0.624551	1	0.872397
44220	GPIHBP1	-0.368951	2.06307e-48	0.00362671	0.300747	0.00476349	3.41928e-28	0.0326018	3.35688e-06	-0.000347131	1.36851e-10	0.000780861	4.4619e-10	-3.04565e-05	0.897943	2.33898e-05	0.941731	-0.00220363	1.85694e-06	2.55627e-05	0.969666	0.000708067	0.268371	-0.000330585	0.640454	0.000448531	0.570307	-0.000306267	0.68955	1	0.872397
44329	PPP1R14A	0.0691768	0.0130111	0.00400616	0.300804	-0.00159463	0.00084515	0.0436606	1.75925e-08	-0.00011693	0.0503847	0.000343981	0.0124892	0.000752253	0.00409794	0.000865141	0.0145789	-0.00172171	0.000751669	0.000485222	0.512707	7.81409e-05	0.912002	8.06624e-05	0.917641	0.000585066	0.502097	0.000250923	0.767214	1	0.872397
50116	TPT1	0.233759	1.3403e-23	-0.00336152	0.300916	-0.0028456	1.16924e-12	0.025501	8.98387e-05	-0.000262582	3.90365e-07	0.000291627	0.0141332	4.27687e-05	0.849301	-0.000202818	0.503241	0.000150022	0.727409	2.22049e-05	0.972205	-0.000337058	0.576659	-0.000579098	0.383618	-0.00144955	0.0495008	0.00112184	0.119788	1	0.872397
51082	MMP3	0.310864	2.50285e-71	-0.00250421	0.300943	0.00354687	1.27272e-32	-0.87344	0	-0.000171943	7.70651e-06	-0.000431011	1.01131e-06	0.000952682	1.20582e-08	-0.000443243	0.0494469	0.000297072	0.353874	-0.00119803	0.0124604	-0.00180074	6.48448e-05	-0.000531452	0.284481	-0.00018852	0.731692	0.000573375	0.287051	1	0.872397
42978	ARHGEF5	-0.154609	4.85293e-09	-0.00379942	0.301362	0.00455435	9.26459e-24	-0.0328547	7.86627e-06	0.000231488	4.42309e-05	-0.000680618	1.99699e-07	0.00116274	3.0492e-06	-0.000759308	0.0235605	0.00172112	0.000385914	0.0028053	5.66655e-05	-0.000371766	0.580412	0.000203112	0.783805	-0.00136326	0.0986462	-0.000360176	0.655351	1	0.872397
42820	SSH3	0.103953	5.43121e-23	-0.0015123	0.301398	-0.00124808	4.76612e-12	-0.0308242	6.92769e-26	-0.000288029	1.46113e-37	0.000153153	0.0030189	-0.000247089	0.0119886	0.000297284	0.0259947	-0.000811194	2.61766e-05	-0.000630442	0.0231603	0.000315739	0.237381	0.000175041	0.552082	7.61854e-05	0.817046	0.000173123	0.589953	1	0.872397
44300	YAP1	-0.900817	0	-0.00147498	0.301668	0.0159783	0	0.0300727	6.69694e-26	-0.000228778	3.25964e-25	0.000337401	2.99754e-11	0.000669323	4.20965e-12	0.000737939	1.5313e-08	-0.000223298	0.235325	0.000158283	0.562297	-0.000611705	0.0188014	0.000591	0.0398839	-0.000524819	0.102564	0.000503326	0.106958	1	0.872397
43673	SERPINA4	-0.0696525	1.89491e-16	-0.00121496	0.302165	0.00157255	2.60278e-27	-0.0427118	3.03197e-73	8.38862e-05	3.77015e-06	-0.000159872	0.00013426	-1.32321e-05	0.868188	-0.000242184	0.0249434	-0.000283231	0.0678193	-0.00020671	0.365593	-0.000281859	0.191227	-0.000281967	0.236762	-0.000813046	0.00214818	-0.000481933	0.0619519	1	0.872397
50678	TNFRSF10A	-0.769801	0	-0.00174573	0.30243	0.0134182	0	0.0524352	8.08762e-54	0.000617837	3.97036e-116	-0.000376511	9.67958e-10	0.000547622	2.74029e-06	0.00126417	1.52143e-15	0.0010298	4.29217e-06	0.000406127	0.222468	0.00109056	0.000552413	0.000745541	0.0312215	0.000653492	0.0888975	0.000432144	0.25205	1	0.872397
50749	GLRX	0.0231301	0.266359	0.00298959	0.302483	0.00150819	2.38443e-05	-0.136852	4.62673e-122	0.000129571	0.0050605	-0.000737031	4.13727e-12	0.00163761	4.03255e-16	-0.000616507	0.0235228	-0.00011561	0.763471	0.00147998	0.00986951	-0.000228408	0.673392	0.00250507	2.49465e-05	-0.00317381	1.36714e-06	-0.000124991	0.84698	1	0.872397
49871	CDHR1	0.156886	2.82268e-24	-0.00221652	0.302549	-0.00201992	2.29782e-14	-0.0158436	0.000233355	0.000277157	4.09676e-16	6.34005e-05	0.417768	0.00120077	6.21701e-16	0.000672681	0.000776072	-0.00049742	0.0806913	-0.000132474	0.753411	-0.00100324	0.0121531	-0.000678926	0.122419	-0.000361375	0.458964	-0.00060712	0.204505	1	0.872397
43602	PPIE	0.100287	5.03914e-06	-0.00314916	0.30269	0.000229923	0.541976	0.0386309	2.66991e-10	-5.65758e-05	0.229242	-2.49249e-05	0.818952	0.000333956	0.10742	7.76221e-06	0.977896	0.00117881	0.00343206	0.000185577	0.751126	1.98292e-05	0.971725	-4.92426e-05	0.936377	0.000399777	0.561338	0.000154914	0.817891	1	0.872397
44201	TGFB2	-0.156057	7.6048e-17	0.00267884	0.302868	0.00248198	1.07209e-14	0.0115152	0.0269538	0.000174111	1.39871e-05	5.1958e-05	0.574565	8.75656e-05	0.618744	6.7147e-05	0.777859	-0.000331543	0.3339	0.000940426	0.0590372	-0.000263908	0.579142	-6.67539e-05	0.898914	-0.000869141	0.138238	-0.000343786	0.546134	1	0.872397
50140	HEBP1	0.00543047	0.77857	0.00277013	0.303142	0.000765915	0.0207577	-0.0352379	6.38609e-11	-4.27088e-06	0.920482	0.000107003	0.276084	-7.27053e-05	0.696243	0.000165195	0.511127	0.000845413	0.0176488	-0.000520176	0.324129	-1.61845e-05	0.974197	-0.000132491	0.809509	-0.000777453	0.202113	-0.000598522	0.316809	1	0.872397
43434	SEMA3G	-0.184773	1.05262e-31	-0.00225604	0.303359	0.00302405	5.20483e-29	0.0948425	3.01985e-103	0.000283723	4.43186e-17	-0.000297643	0.000132587	0.00104561	1.78677e-12	-0.000354599	0.077728	-0.000494752	0.0861488	-0.000126119	0.7648	-0.000199821	0.617036	-5.32287e-05	0.903943	-0.00121908	0.0138017	0.000171138	0.720426	1	0.872397
44448	APOA2	-0.752154	0	-0.00249664	0.303533	0.0114447	0	0.189702	0	-9.6704e-06	0.796445	0.000713599	1.72417e-16	-0.000852772	2.16968e-07	-8.99948e-05	0.685488	-0.000100141	0.754205	-0.00182671	8.52081e-05	-0.0023065	1.93743e-07	-0.000247557	0.612629	-0.000301231	0.581084	0.000182085	0.731955	1	0.872397
42820	PSMC3	0.0800384	1.74986e-13	-0.0015506	0.304631	-0.00102512	3.77694e-08	-0.0268777	6.15382e-19	-4.61835e-05	0.0464135	0.000233051	1.23133e-05	0.000174362	0.0858544	0.000116806	0.396739	2.47024e-05	0.901275	-0.000472334	0.0993043	-0.000388398	0.159099	-0.000175749	0.562979	6.95855e-05	0.837797	9.70885e-05	0.769681	1	0.874693
44329	CCDC50	0.214262	3.14286e-15	0.00386979	0.305413	-0.000997846	0.0322201	0.00422987	0.575605	2.97112e-05	0.610172	0.000479213	0.000359161	0.000532333	0.03725	0.000912917	0.00821576	-0.000118887	0.811388	-0.00110536	0.126223	-0.000346258	0.615559	0.000893706	0.240071	0.000750205	0.377496	0.000301959	0.714898	1	0.875409
50116	RAB37	0.688404	1.467e-119	0.00421209	0.305716	-0.00940413	1.03621e-76	0.0250618	0.0023537	-0.000589044	2.45028e-19	0.000146087	0.331379	0.000403523	0.156605	-0.000463926	0.226313	-0.00339992	4.34827e-10	0.000112833	0.888738	0.000464501	0.543233	0.000775166	0.35677	-0.00185497	0.0470099	0.00137278	0.132523	1	0.875409
43355	GLA	-0.0914109	3.60542e-11	0.00196639	0.305779	0.00350786	1.62123e-49	-0.160565	0	0.000110334	0.000192191	-0.000220195	0.00124209	0.000806181	5.36342e-10	0.00110047	4.24517e-10	0.0011395	6.46275e-06	0.000623783	0.0910193	0.0010785	0.00207434	0.00031423	0.416098	0.000408098	0.346597	0.000110131	0.79257	1	0.875409
50949	ANG	-0.112748	2.67208e-20	0.00174129	0.30609	0.00418162	2.08031e-88	-0.217181	0	0.000303205	3.13151e-29	0.000404249	8.71195e-11	0.000465131	8.00205e-05	0.000608745	0.000137166	0.00070014	0.00189709	-0.000572311	0.0877628	-0.000811452	0.0106163	-0.000188784	0.587397	-0.000697117	0.0703954	0.00171547	5.80286e-06	1	0.875442
44480	PROS1	-0.142332	2.81416e-55	0.00129039	0.30699	0.00272814	1.64769e-68	-0.0353896	1.6345e-44	-0.000134971	3.91396e-12	0.0001518	0.000727334	0.0001391	0.103442	0.000834462	5.31193e-13	-0.000121327	0.46598	-0.00017203	0.47725	-0.000223427	0.332848	-0.000118938	0.640914	-0.000651542	0.0219476	0.000142114	0.607078	1	0.875504
51430	METAP2	-0.0555561	0.00688565	0.00292375	0.30798	0.00104589	0.00301213	-0.0828382	4.18957e-47	0.000352422	1.06029e-14	-0.000647666	5.20438e-10	0.00106847	6.4247e-08	0.000749101	0.00508986	-0.001645	1.45919e-05	0.000949325	0.0936341	0.000484701	0.362585	0.000742487	0.205053	0.000466726	0.472789	0.000847556	0.182331	1	0.875504
49972	CTSH	-0.504518	4.16695e-83	-0.0037022	0.308059	0.0111964	1.74026e-137	-0.165964	1.9874e-114	0.00293824	0	5.61589e-06	0.966241	-0.00234046	1.44929e-20	-0.00173162	3.42653e-07	-0.00265961	3.26315e-08	0.0015337	0.0311383	-2.50547e-05	0.970435	0.000264783	0.721206	-0.000796629	0.333206	-0.00243489	0.00258813	1	0.875504
43120	EIF4E	0.151872	2.61394e-06	0.00458489	0.308376	-0.00142888	0.00995251	-0.0643181	8.90794e-13	0.000107333	0.1213	-0.000707664	1.04952e-05	0.00178152	5.1302e-09	0.000978453	0.0174053	-0.00176644	0.00288347	0.00105418	0.217968	0.00137424	0.0942518	0.000740774	0.413466	0.00171137	0.0907727	0.00079059	0.423101	1	0.875504
51518	LRPAP1	-0.16928	5.79701e-17	-0.00286959	0.30867	0.00613833	6.7533e-70	-0.118527	1.78299e-97	1.95902e-05	0.661263	0.00052706	2.99048e-07	0.000544174	0.00527743	-0.00102055	0.000106647	0.00442162	2.44236e-32	6.84776e-05	0.902417	-0.00115599	0.0276234	-0.0031042	7.60235e-08	0.00122381	0.055414	7.92013e-05	0.899578	1	0.875504
49871	STK24	0.0969759	1.15967e-05	-0.00313644	0.308851	-0.000964143	0.0110217	-0.014729	0.0170135	-2.45101e-05	0.615645	-0.000432908	0.000113778	0.000863229	5.00615e-05	0.000184611	0.519907	-0.00245102	1.94136e-09	0.00118932	0.0491519	0.000631036	0.271209	-0.000549579	0.383083	0.000753296	0.281567	0.000461986	0.500635	1	0.875504
44409	RAB27B	-0.0276413	0.344129	0.00413335	0.308856	-0.00158109	0.00160757	-0.0169912	0.0365558	0.000241892	0.000116968	-0.000473864	0.00107703	0.00147865	7.8676e-08	0.00110426	0.00290564	-0.00213319	6.82656e-05	0.000749672	0.339637	0.00173671	0.0189855	-0.000715104	0.382478	0.000841462	0.357419	0.000562963	0.526977	1	0.875504
43602	VSTM2B	0.101246	7.73191e-12	0.0020885	0.309842	-0.000757043	0.00285377	0.0119001	0.0038332	-0.000117099	0.000218166	0.000131068	0.0737363	-0.000228127	0.102279	3.91425e-05	0.835556	-0.000619795	0.0222632	-0.000329371	0.402976	-0.00014785	0.694572	-0.000114346	0.783013	-0.000155005	0.737922	5.47387e-05	0.903785	1	0.875504
50915	TINAGL1	-0.420842	0	-0.0011275	0.310338	0.00772823	0	-0.0313845	4.9791e-45	0.00031445	3.12214e-70	-8.94432e-05	0.0278144	0.000252474	0.00103719	-0.00027806	0.00768582	-0.000382657	0.00931803	0.000162853	0.469255	-0.000151026	0.466592	0.000266387	0.245053	6.38658e-05	0.799917	0.000120699	0.626426	1	0.875504
42820	GIMAP8	-0.130593	6.98755e-13	-0.00256253	0.310895	0.00372628	7.67672e-33	-0.0719706	8.21352e-46	-1.66471e-05	0.668056	-3.41188e-06	0.969499	0.000474073	0.00527838	-2.04563e-05	0.929358	0.000453429	0.173798	3.99183e-05	0.933687	0.000146379	0.751249	0.000410712	0.419428	-0.00120846	0.0337112	-0.000579214	0.29678	1	0.875504
50958	FSTL3	-0.861214	0	-0.00170435	0.311552	0.0156407	0	0.0109742	0.00114464	-0.000601298	3.92629e-111	8.29609e-05	0.177943	0.00118116	4.18637e-24	0.000975006	6.19556e-10	0.000907607	4.79489e-05	0.000210322	0.528801	0.000981786	0.00180393	0.000286454	0.407425	-0.000254445	0.505575	0.000709878	0.0582136	1	0.875504
44480	SERPINA6	0.0264616	1.4113e-05	0.000858026	0.311663	-0.0018124	4.02944e-67	0.156094	0	-0.00015142	4.559e-31	0.000299644	3.08714e-23	-8.65164e-05	0.131416	0.000134639	0.0827611	-0.000553269	7.38284e-07	-0.000327037	0.0441768	-0.00043537	0.00494652	-0.000101358	0.553834	-0.000284179	0.136608	-0.000266511	0.150892	1	0.875504
42948	GBP6	0.108288	1.4029e-11	-0.0022575	0.311856	-0.00108027	8.49714e-05	0.00479815	0.282054	-0.000134927	8.14619e-05	9.52565e-05	0.227679	3.02984e-05	0.840291	0.000188121	0.355119	0.00042926	0.14465	5.57493e-05	0.894973	-0.00047378	0.244071	-0.000275237	0.539311	-0.000907117	0.0701901	0.000149013	0.760396	1	0.875504
42948	FDX2	-0.0135481	0.504415	0.00285473	0.312722	0.00136601	8.7543e-05	-0.0221835	8.65279e-05	0.000265476	9.43496e-10	-0.00037718	0.00016301	0.00105752	2.83543e-08	0.000639318	0.0131165	0.000624609	0.0938436	0.00046528	0.384454	0.000437646	0.395661	0.000954573	0.0928536	0.00147858	0.0198213	0.000693761	0.262389	1	0.875504
44300	FNDC1	-0.433031	2.13698e-143	-0.00237621	0.312877	0.00776634	1.85999e-156	-0.0112558	0.0168282	-0.000359382	4.87055e-23	0.00102668	1.49607e-34	0.00104699	4.86958e-11	0.00129991	1.49557e-09	-0.00150611	1.20884e-06	-0.000862181	0.0555896	0.00182457	2.13759e-05	0.000785316	0.097692	-0.000215495	0.684322	0.00057582	0.263341	1	0.875504
43120	ADAMTS4	-0.525681	0	0.00180111	0.313181	0.00950786	0	-0.0061775	0.083546	-0.000198591	5.08252e-13	4.84005e-05	0.447414	0.000348196	0.00399266	0.000944469	7.26954e-09	0.000244802	0.29792	-0.000146029	0.667103	-0.000397241	0.222777	-0.000209254	0.560391	0.000438139	0.275105	0.000107295	0.784077	1	0.875504
43120	ACRV1	0.568066	3.76732e-97	0.00379847	0.314069	0.0149907	1.28986e-225	-1.81463	0	-0.000398583	6.80654e-12	-3.64965e-05	0.786281	0.000462906	0.0700754	-0.000263037	0.44568	-0.00233491	2.62216e-06	-0.00087488	0.222595	-4.40903e-05	0.948933	-0.00117292	0.122421	5.52074e-05	0.948104	0.00127381	0.123645	1	0.875504
42948	NFKB1	0.167591	2.86076e-10	0.00372644	0.314137	-0.00162287	0.000371094	-0.0898706	6.61979e-34	5.73443e-05	0.312611	-0.000580648	9.27664e-06	0.00135721	5.26855e-08	0.000922331	0.00626607	-0.00124198	0.0109381	0.000943596	0.177898	0.00107564	0.110804	-0.000126322	0.86511	-0.000869754	0.295188	-0.000268001	0.740866	1	0.875504
44300	STX3	0.069354	4.01446e-07	0.00191605	0.314202	-8.21285e-06	0.972085	-0.0116211	0.00227089	-0.000128538	1.21856e-05	0.000191719	0.00460274	-0.00025843	0.044689	-1.6981e-05	0.922186	-0.000412833	0.0998092	6.44522e-05	0.859521	-0.000874026	0.0117994	-0.000405613	0.290086	-0.000567285	0.185607	1.35033e-05	0.974121	1	0.875504
43120	NXPH3	-0.303272	5.50186e-166	-0.00154115	0.31431	0.00424731	1.27916e-111	0.104625	1.47155e-252	-2.62721e-06	0.911261	0.000135249	0.0133155	0.000368649	0.00038004	1.41274e-05	0.919626	0.000279667	0.165595	-3.97193e-05	0.891498	-0.000371239	0.184027	-0.000602768	0.0505186	-0.000561207	0.103117	-0.00127735	0.000142859	1	0.875504
43195	SEZ6	-0.203193	1.1891e-73	-0.00156182	0.314439	0.00277349	2.26032e-47	0.0931318	1.57242e-195	-4.42929e-05	0.0644529	-0.000309992	2.00656e-08	0.000132889	0.206215	0.000231428	0.103217	0.000644649	0.00162851	0.000221351	0.453162	0.000247492	0.382845	-0.000167118	0.592494	-0.000131202	0.706871	-0.000784172	0.0212226	1	0.875504
51518	TNFRSF21	-0.415749	0	-0.00136697	0.31488	0.00699776	0	0.053913	7.10887e-87	-0.000437987	2.77166e-91	0.000117835	0.0175762	0.000703871	7.64908e-14	0.000200575	0.11447	0.000382647	0.0336031	-0.000416433	0.122283	0.000351699	0.164888	-0.000541999	0.0516917	0.000207412	0.501039	0.000314522	0.298998	1	0.875504
51109	SPARCL1	-0.275232	3.26206e-172	-0.0013709	0.315585	0.00440433	2.18815e-150	0.0541769	5.32507e-87	0.000589968	1.81927e-161	-0.000314272	3.52292e-10	0.000987216	2.2039e-25	0.000272842	0.0335654	-0.00117055	9.5229e-11	0.000405032	0.133542	-0.000572798	0.024817	-0.000296798	0.2889	0.000381997	0.217494	-0.00011209	0.712296	1	0.875504
51546	LAMP3	-1.05769	0	0.0028114	0.31585	0.0208593	0	-0.136116	2.10881e-129	-0.000885976	1.19478e-87	-0.0002565	0.0120472	0.00119994	5.8418e-10	0.00244065	1.18845e-20	0.0045556	1.14632e-34	-0.000663217	0.23208	0.00123711	0.017465	0.000838701	0.143216	0.0041331	7.56144e-11	0.000231795	0.709004	1	0.875504
49391	LPO	0.233082	2.20802e-27	-0.00299997	0.315965	-0.00370432	9.65639e-24	0.0019882	0.740299	0.00273308	0	-0.000739551	1.14749e-11	0.00126005	1.05931e-09	0.00153573	4.25839e-08	0.00217736	4.09303e-08	-0.000921023	0.119769	0.000817135	0.142213	4.62074e-05	0.939745	0.000139491	0.83711	-0.00250339	0.000173669	1	0.875504
43434	PDE5A	-0.0801	0.0314984	0.0051925	0.316171	0.000248029	0.697857	-0.0414862	6.23499e-05	0.000236331	0.00305726	-0.000453516	0.0137412	0.00145504	3.29572e-05	0.000650994	0.170593	-0.00347516	3.40402e-07	0.000621456	0.532768	0.00193919	0.0400414	-0.000585564	0.574291	0.000918233	0.43257	0.000508202	0.652937	1	0.875504
43120	PSMG4	0.0289732	0.163681	0.00290409	0.316188	0.00246182	5.31192e-12	-0.171109	6.23631e-190	0.000240143	7.27566e-08	-0.000780156	4.50899e-14	0.000994702	4.01419e-07	-0.000191857	0.468823	0.000125997	0.741241	0.000956789	0.0823877	0.0012429	0.0187182	0.00152782	0.00878829	-0.00150361	0.0209737	0.000119207	0.85116	1	0.875504
44300	TIMM8A	0.287123	1.03236e-20	0.00427891	0.317292	-0.00380432	5.59275e-13	-0.0841604	8.31979e-23	-7.41052e-05	0.261786	-0.000416239	0.0061952	0.00112995	9.40922e-05	0.00014183	0.7166	-0.00365008	9.60899e-11	0.000531416	0.516161	0.0010961	0.159992	-0.000546281	0.526105	0.00132182	0.169962	-0.000691753	0.459641	1	0.875504
13648	NPM1	-0.0129537	0.776883	-0.00624509	0.317887	0.00295934	0.00015528	-0.178694	6.57032e-45	0.000469723	3.10867e-06	-2.37344e-05	0.917911	0.00107663	0.012932	0.000413477	0.47755	0.00173863	0.038554	0.00325097	0.013142	-0.00049039	0.682145	0.00199051	0.136061	-0.00247209	0.0911865	-0.00304207	0.0308239	1	0.875504
51291	NELL2	-0.168375	8.99863e-60	0.00143542	0.318096	0.00185335	1.13064e-25	0.134979	0	0.000580561	1.73987e-141	-0.000282633	7.20505e-08	0.000180486	0.0693221	0.000252903	0.060133	0.00193969	2.3705e-24	0.000105149	0.712711	0.00146924	4.51616e-08	0.000698526	0.0180139	0.000538504	0.0987018	-0.000848489	0.00802287	1	0.875504
49877	RBKS	-0.118158	2.0673e-10	0.00258412	0.318419	0.00499171	4.05149e-55	-0.250146	0	-0.000263558	1.60199e-10	-0.000690056	2.61337e-13	0.000253207	0.156728	-0.000666381	0.00601016	0.000797493	0.0200918	0.00203567	6.35888e-05	0.00128303	0.00793985	0.00100674	0.05733	-0.00212884	0.000293005	-8.82679e-05	0.878739	1	0.875504
51082	NCAM2	0.10325	3.39742e-25	0.00138283	0.318464	-0.00239114	1.54709e-44	0.0659178	7.69218e-124	-4.7207e-06	0.830147	-3.41473e-05	0.498641	-0.000261746	0.00623877	-0.00127269	6.97915e-23	-0.00056958	0.00190673	0.000474533	0.0838654	-0.000769155	0.00288291	0.000832008	0.00342932	0.000837971	0.00777329	-0.000584158	0.0581825	1	0.875504
51228	S100A4	0.267756	2.50737e-39	0.00283708	0.318675	-0.00432066	4.96154e-35	-0.0929989	7.99416e-60	0.000329326	2.88587e-13	-0.000314327	0.00252029	0.000684208	0.000515217	0.000656004	0.0135002	-0.000556113	0.139525	0.00147922	0.00873876	0.00117998	0.0256318	0.000874173	0.133071	-0.000251628	0.696143	1.64525e-05	0.979217	1	0.875504
50836	UBAC1	0.00124571	0.921027	0.00174503	0.318944	0.00122968	1.15917e-08	-0.118162	5.03613e-246	0.000156666	1.70842e-08	-0.000266064	3.07774e-05	0.000398759	0.000994655	-0.000271036	0.0967884	-0.000427802	0.0651293	0.000892349	0.0115274	5.17607e-05	0.873452	0.000964884	0.00729204	-0.0017587	9.68465e-06	9.75951e-05	0.802033	1	0.875504
43195	RAC3	0.19281	2.35744e-15	0.00336997	0.319007	-0.000905691	0.0300081	0.0410919	1.25867e-09	-0.000101826	0.0509948	-1.98876e-05	0.868702	-8.37146e-05	0.714678	-0.000363133	0.240468	-0.000565893	0.204138	-0.000170192	0.791164	1.69097e-05	0.978162	4.74011e-05	0.944435	-0.00118854	0.117819	-0.00198911	0.00729493	1	0.875504
49741	CST6	0.747011	0	-0.00239627	0.31915	-0.0105052	3.53355e-272	-0.288315	0	-0.000702368	2.29707e-75	-0.000208395	0.0180322	0.00156161	9.89828e-21	-0.000720963	0.00135851	0.00297345	1.0959e-20	0.000925789	0.0489525	0.000415619	0.353458	-0.000629468	0.199833	-0.00185283	0.000663356	0.00377484	1.68445e-12	1	0.875504
43195	DIPK1C	0.101152	1.48269e-11	0.00207203	0.319694	-0.00121836	2.13249e-06	0.0234656	1.77963e-08	-0.000133512	3.24701e-05	6.47401e-05	0.382138	4.18707e-05	0.766494	-0.000260499	0.171443	-0.000547663	0.045945	0.000245	0.535855	-0.000234409	0.537707	0.000735839	0.078893	-0.000552119	0.238014	-0.000230872	0.613001	1	0.875504
49220	CEACAM5	-0.674484	4.21876e-173	0.00332547	0.319695	0.0136783	1.30605e-240	-0.0585795	2.04602e-18	-0.000140366	0.00803848	-0.00071969	3.75838e-09	0.00030965	0.180645	0.00204751	4.31346e-11	0.0036686	1.26106e-16	2.81476e-05	0.965698	0.00143329	0.0209548	0.00237995	0.000498418	0.00263655	0.000507908	-0.00188277	0.0110643	1	0.875504
43195	CUZD1	0.0696772	2.43867e-07	0.00186308	0.320538	-0.000278441	0.229007	-0.0128134	0.000638289	0.000170535	3.81272e-09	-0.000462973	4.00841e-12	0.000811729	1.6573e-10	-0.000146983	0.391616	-0.000537798	0.0295589	0.000449121	0.207684	-0.000865267	0.011553	-4.59984e-05	0.902938	-0.000855095	0.0424729	0.000803616	0.0506344	1	0.875504
44201	SNX2	0.0726152	0.0123477	0.00400581	0.320563	-0.00123596	0.0130416	0.0987532	2.3889e-34	-0.000834543	5.13992e-41	0.00050701	0.000413529	1.89582e-05	0.944622	0.000256538	0.487125	-0.00341918	1.33294e-10	-0.00074769	0.333173	-0.000901198	0.222051	-0.00129898	0.111	0.000409786	0.652268	-2.03684e-05	0.981606	1	0.875504
51196	FETUB	0.0684939	1.14817e-08	0.00166157	0.320609	-0.0029112	2.34798e-45	0.160167	0	0.00065627	6.24311e-134	-0.000394167	1.21192e-10	0.000446881	0.000115495	0.000400682	0.0106978	-0.0012675	1.04417e-08	-0.000113472	0.731026	0.00114867	0.000233625	-0.00116487	0.000667343	0.00064778	0.0874184	0.000206188	0.579226	1	0.875504
50140	CLTA	-0.0382919	0.022802	-0.00232517	0.320946	0.00194518	1.55833e-11	-0.0259995	3.08212e-08	3.55661e-05	0.339774	-0.00018062	0.03476	0.000273253	0.0920156	0.000100905	0.644876	-0.00153369	7.70102e-07	0.00041474	0.366656	9.78633e-05	0.822301	-0.000508835	0.287732	0.000186874	0.724778	0.000274054	0.598648	1	0.875504
50674	DSG4	0.679173	0	0.00244684	0.321073	-0.0127949	0	0.0670844	5.97027e-42	-0.00184499	0	-0.00119773	2.20655e-40	0.000106021	0.534186	-0.00056323	0.0141672	0.00456262	2.89155e-44	0.000617079	0.216444	0.0020208	1.00184e-05	-0.00183432	0.00029805	-0.000200391	0.720249	0.00324226	3.31966e-09	1	0.875504
43120	BAG4	-0.0507093	0.00469452	0.00247715	0.321371	0.00228629	1.09572e-13	-0.0357814	7.86433e-13	-8.76088e-05	0.0226916	-0.000238889	0.00734963	0.00085956	3.77783e-07	0.000474766	0.0376085	-0.00144709	1.09107e-05	0.000503711	0.288846	0.00052923	0.245575	-1.33737e-05	0.978776	-0.000296075	0.598028	-0.000734684	0.179828	1	0.875504
43602	CENPJ	0.276206	7.57866e-28	-0.00347906	0.321404	-0.00319879	1.51307e-13	0.0286814	4.41363e-05	-5.24591e-05	0.331632	3.49914e-05	0.779607	-0.00010798	0.650325	-0.000439781	0.171627	-0.00113107	0.0144847	-0.000264175	0.694197	-0.000679071	0.290482	-0.000520422	0.462549	0.00081531	0.302265	0.000225736	0.770144	1	0.875504
49867	RANGAP1	0.164164	4.50478e-21	-0.00240847	0.321513	-0.00217456	3.35188e-13	0.0123713	0.0109563	-0.000221372	9.1109e-09	-1.44571e-06	0.986975	-0.000365083	0.0296324	5.60368e-05	0.803973	-0.00116694	0.000289246	-1.86358e-05	0.968872	-0.000376875	0.403057	-0.000571411	0.249752	0.00072018	0.191513	-0.000970239	0.0714926	1	0.875504
44329	SPAG1	0.101314	9.41266e-07	0.00284546	0.321733	-0.000682964	0.0539283	-0.00353158	0.538837	-0.000341671	1.29412e-14	0.000129707	0.204064	0.00067345	0.000530584	0.000350164	0.182514	-0.00136065	0.000329548	-0.000979428	0.0748166	-0.000464038	0.376232	0.000961651	0.0964805	-9.95144e-05	0.877666	0.000325243	0.604917	1	0.875504
44300	DNAJA4	-0.0783034	0.00252546	0.00357349	0.321866	0.00355004	1.46343e-15	-0.132832	1.94389e-75	0.000752683	1.44691e-41	-0.000264271	0.0392621	0.00056629	0.0202508	-0.000454758	0.16741	-0.000435075	0.359991	0.00241657	0.000462001	-0.000183107	0.780688	0.0036345	5.66514e-07	-0.0041549	3.12251e-07	0.0010359	0.189043	1	0.875504
50999	BCL2L11	-0.381983	5.25233e-133	0.0021434	0.32195	0.00649165	1.23635e-130	-0.0857979	8.15011e-87	-0.000315493	5.64296e-20	-0.000283886	0.000325381	0.000971881	8.36544e-11	0.000399423	0.048748	-6.30594e-05	0.825989	0.000164738	0.699391	-0.000444563	0.26937	-0.000607202	0.169921	0.00191766	9.27831e-05	-0.000104195	0.828539	1	0.875504
44409	MAN2B2	-0.355586	5.93904e-63	0.00291865	0.321993	0.007922	1.12647e-104	-0.219417	1.76827e-298	-0.000121045	0.00788209	-0.000709304	1.54105e-11	0.000760711	0.000140063	0.000333957	0.214549	-0.000272089	0.483848	-0.000983193	0.0843467	-0.000177755	0.740701	-0.00126484	0.0332564	-0.000873244	0.188073	0.00200042	0.0019476	1	0.875504
43195	SLC44A4	0.123292	4.92017e-07	0.00337148	0.322309	1.62075e-05	0.969248	0.0317696	3.14201e-06	-5.32296e-05	0.311163	-2.72345e-05	0.822186	-0.000261418	0.257076	-0.000616144	0.0480179	2.09623e-05	0.962754	0.000837949	0.195564	-0.000286542	0.645162	0.000839961	0.220171	-0.00143286	0.0612326	-0.000155903	0.83462	1	0.875504
43232	AHNAK2	-0.190742	2.29332e-73	0.00144521	0.322591	0.00434904	7.84303e-128	-0.069368	1.23256e-123	-0.000410835	9.35932e-74	0.000227879	1.31487e-05	0.00099392	1.2076e-23	0.000421129	0.00165031	-0.000934519	1.19574e-06	-6.7381e-05	0.809469	-0.000518776	0.0515783	-0.000402736	0.171346	-4.0404e-05	0.902513	0.000770727	0.0158814	1	0.875504
44409	PTPRZ1	-0.84129	0	0.00162723	0.322804	0.0135412	0	0.173319	0	8.84081e-05	0.000511032	-0.000455951	8.36309e-15	-0.000143723	0.19761	-0.000662017	1.05687e-05	0.00138562	1.73794e-10	7.52432e-05	0.813023	0.000577002	0.0544228	-0.000134781	0.684569	0.000764322	0.0391145	-0.000873575	0.015408	1	0.875504
51631	HPCAL1	0.0884164	0.000756567	0.00361907	0.322986	-0.00282338	3.61017e-10	-0.0264734	0.000303681	0.000243721	2.88072e-05	-0.000459004	0.00058987	0.00131725	1.96767e-07	0.000943401	0.00574869	-0.00149677	0.00200207	0.00127702	0.077779	0.00106584	0.116578	-4.70926e-05	0.949775	0.00139054	0.0938019	-4.15772e-05	0.95915	1	0.875504
51082	OGN	-1.22838	0	-0.00208014	0.32315	0.0200204	0	0.201031	0	0.000791068	3.69296e-123	0.000727595	2.36123e-21	0.00196392	1.59178e-41	-7.95589e-06	0.967654	-0.000584869	0.0358394	0.000567153	0.173748	-0.000311659	0.42662	4.39053e-05	0.919016	0.00131965	0.00578478	0.000201806	0.666573	1	0.875504
51706	HYOU1	-0.166616	7.41665e-98	-0.00109029	0.323495	0.00293853	2.2755e-103	0.000955693	0.665483	-0.000540927	6.05043e-207	0.000237049	4.42454e-09	0.000254951	0.000867927	0.000390073	0.000161661	-0.000528495	0.000298855	-0.000315788	0.148567	0.00037845	0.065731	-0.000967494	1.8953e-05	-0.000633199	0.0114023	0.000771821	0.00166611	1	0.875504
51706	EPHB4	-0.201637	4.35605e-115	-0.00121422	0.323553	0.00431656	9.65888e-178	-0.0552517	5.19675e-111	-0.000360363	9.93801e-76	0.000428006	1.92296e-21	0.000660834	9.33134e-15	0.000172689	0.133732	0.000237553	0.144432	-2.96064e-05	0.903215	0.000463879	0.0428482	-0.000126246	0.616299	-7.93228e-05	0.775966	0.000227317	0.405736	1	0.875504
44300	KIAA0319	-0.313849	1.82111e-171	-0.00153577	0.324144	0.00513339	3.37172e-156	0.0669656	5.30133e-102	-0.000171633	9.49831e-13	-0.000330785	2.30659e-09	0.000406387	0.000114165	-0.000100961	0.477805	0.00062258	0.00241785	-3.79019e-05	0.898776	0.00010639	0.707924	-1.7668e-05	0.955084	-0.00039209	0.26347	-0.000445225	0.191101	1	0.875504
44215	SEPTIN8	-0.518169	0	0.00162264	0.324796	0.0103124	0	-0.0709305	3.27125e-102	-0.000298677	1.03045e-31	4.24714e-05	0.468351	0.000937457	4.16868e-17	0.000746053	7.1452e-07	4.55936e-05	0.83366	0.000212073	0.500936	-0.000324379	0.280684	0.00114311	0.000576569	-0.000341542	0.357652	-0.000193108	0.592198	1	0.875504
50594	EREG	0.0844319	0.00314269	0.00391943	0.325149	0.000471065	0.336713	-0.0375226	2.57285e-06	0.000330887	1.73136e-07	-0.000578397	6.83377e-05	0.00167717	1.13307e-09	0.000717356	0.0549055	0.000285171	0.588634	0.000333689	0.669938	-5.59731e-05	0.939983	-0.00193913	0.0172543	0.0017429	0.0537418	0.00161438	0.0692107	1	0.875504
44286	GSN	-0.0454978	1.19098e-11	-0.000916043	0.326021	0.00100955	1.77287e-18	-0.0243314	8.44303e-39	0.000220485	1.32311e-52	0.000195537	4.20341e-09	0.000366781	6.49269e-09	1.11243e-05	0.896253	-0.000954508	8.41393e-15	0.000355434	0.046378	-0.000211971	0.21283	-5.11552e-05	0.785313	-0.000198567	0.343721	0.000592482	0.00370558	1	0.875504
43120	FOXJ3	0.0615224	0.000142133	0.0022102	0.326418	-0.000133409	0.630549	-0.0086674	0.0542093	-4.05911e-05	0.241607	-0.000214078	0.00771326	0.000732075	1.59678e-06	0.000475698	0.020858	-0.00108205	0.00026441	-0.000381693	0.372685	0.000227683	0.579522	0.000198735	0.66104	-0.000913029	0.071338	-0.000374478	0.448271	1	0.875504
51631	CD160	-0.278303	3.80127e-62	-0.0022867	0.326501	0.00506786	8.57146e-70	0.0201574	1.55158e-05	-0.00105086	2.56755e-175	0.000146448	0.0849503	0.000807472	5.42356e-07	-4.7561e-05	0.826828	-0.000518972	0.0923013	8.80522e-05	0.848465	0.00116193	0.00718975	-0.000370351	0.436376	-0.000357254	0.498769	-0.000854165	0.0982686	1	0.875504
42978	ITPRIP	0.28328	1.2067e-66	0.00223884	0.32659	-0.00414854	3.83262e-49	0.0476165	1.85973e-25	-0.000363201	5.91551e-25	0.000274797	0.000719686	-8.37624e-05	0.58803	7.96833e-06	0.969467	-0.000720396	0.0166973	0.000320902	0.458106	-5.4991e-05	0.895212	0.000758356	0.0989255	-0.0017609	0.000590451	7.21557e-05	0.885472	1	0.875504
51207	TFF2	-1.2561	0	-0.00290603	0.32677	0.0219059	0	0.143332	4.15098e-128	0.000332951	1.66413e-12	-2.69697e-05	0.803203	0.00118159	8.10265e-09	0.000473183	0.0877823	0.00550095	1.5785e-44	0.00133647	0.023109	0.00162621	0.00329377	0.00315072	2.24217e-07	0.00132928	0.048049	9.90701e-05	0.880581	1	0.875504
44448	C9	-0.487186	1.2729e-145	0.002575	0.326789	0.00606585	6.51911e-78	0.186929	1.61091e-273	0.000124136	0.00221611	0.000518892	3.06317e-08	0.0011987	1.66052e-11	-0.000113787	0.636093	0.000107753	0.755559	-0.000312402	0.534597	0.000778791	0.104307	0.000573839	0.278126	-0.00188714	0.00140204	-0.000742357	0.196905	1	0.875504
49867	HPGDS	-0.00598835	0.657277	-0.00184236	0.327731	-0.000139612	0.546293	0.0138022	0.000249277	-5.46091e-05	0.0672845	0.000522858	2.58375e-14	0.000336388	0.00970054	-0.000788733	6.5339e-06	-0.00198542	1.76048e-15	0.000103671	0.779349	0.000385882	0.269186	-2.14035e-06	0.995561	2.35187e-05	0.9561	-0.000545666	0.190806	1	0.875504
44201	CCDC134	0.0316665	0.0685743	0.00236437	0.327792	-0.000138892	0.641447	0.0250981	2.12596e-07	-0.000116974	0.0016849	-0.000141264	0.100524	0.000556527	0.000665953	0.000589777	0.00766753	-0.000125364	0.694182	0.000557967	0.22805	0.000501492	0.256723	4.70298e-05	0.923274	0.000694165	0.202639	0.00117718	0.0261521	1	0.875504
43120	RNF31	0.0801014	1.07581e-09	0.00178923	0.328018	-0.000980137	1.3615e-05	0.00101159	0.782054	-6.66866e-05	0.0178596	-5.66965e-05	0.384951	0.0001227	0.321989	0.000165244	0.323048	-0.000562612	0.0195249	2.60755e-05	0.94023	-0.000206621	0.535863	-0.000160465	0.662912	-3.87461e-05	0.924933	-0.000215503	0.591076	1	0.875504
50999	CCL3	-0.972051	0	0.00301345	0.328407	0.0189361	0	-0.0772342	8.27925e-36	0.00162201	8.5947e-237	0.00125959	4.74843e-29	0.000703495	0.000968218	0.000443075	0.124938	0.00118154	0.00384025	-0.000105933	0.861651	-0.00139033	0.015337	0.000580697	0.356939	0.000537116	0.442229	0.0014845	0.0303427	1	0.875504
42948	BRDT	-0.00824758	0.529644	0.00178543	0.328788	0.000272874	0.225474	0.0056857	0.119638	-0.00013372	1.86724e-06	-2.49108e-05	0.700105	0.000699063	1.38076e-08	0.00062036	0.000197055	-0.000798253	0.000927359	0.000142637	0.680058	-4.58735e-05	0.890473	0.000237747	0.517384	-5.61925e-05	0.891073	-0.000127997	0.749104	1	0.875504
51082	APOH	-0.25499	2.38371e-88	-0.00173298	0.329971	0.00492074	2.73851e-111	-0.0130302	0.000256934	-0.000258717	5.35194e-20	0.000294173	5.58592e-06	2.80633e-05	0.819265	0.000842178	3.78132e-07	-0.000100315	0.670079	0.000278284	0.42957	-0.000610671	0.0652469	-0.00103032	0.00474731	0.000163305	0.686064	0.00104125	0.0085145	1	0.875504
51543	UMOD	0.0874679	7.07651e-06	0.00264525	0.329976	-0.00551747	3.53588e-61	0.304676	0	0.000222809	2.4201e-07	0.000851096	1.01182e-17	-0.00252375	5.68896e-41	-0.00207178	3.5027e-16	-0.00106405	0.00309115	5.11201e-05	0.924619	-0.000917834	0.0694092	-2.08124e-05	0.970187	0.000979608	0.111218	-0.00119451	0.0476855	1	0.875504
49867	CFC1	-0.35875	6.53579e-101	-0.00228004	0.330054	0.00704723	1.12738e-131	-0.00902038	0.0542021	-0.000321491	4.74035e-18	1.24925e-05	0.883601	0.00028287	0.0802952	0.000560049	0.0100393	-0.000449572	0.147229	-0.00103309	0.0247622	-0.00114826	0.00819361	-0.00287541	1.85668e-09	0.000536935	0.312189	-0.000531548	0.30546	1	0.875504
42820	LYZL2	0.163852	6.09096e-37	0.001745	0.330401	0.000763499	0.000556087	-0.306351	0	-0.000220945	1.01844e-15	4.38139e-06	0.944785	0.000401062	0.000872942	-2.30334e-06	0.988766	-0.000724811	0.00216624	0.000422407	0.214281	-0.000797926	0.0148027	-5.04937e-05	0.888651	-0.00136654	0.000707026	0.000160662	0.683122	1	0.875504
49867	FCGR2B	0.0208605	0.316231	0.00282492	0.330494	0.00114565	0.00132601	-0.0827426	6.29329e-46	0.000265495	8.03142e-09	6.29774e-05	0.551737	0.000865854	1.58406e-05	-0.000704862	0.00898033	-0.00110129	0.00419706	0.000400093	0.483215	0.000985961	0.0671397	-0.000152225	0.797481	-0.000855445	0.194153	0.000558876	0.384923	1	0.875504
42978	AGBL2	-0.18199	1.89702e-08	-0.00438071	0.330862	0.00180124	0.00117513	-0.00714055	0.428	-0.000263557	0.000147975	-0.000190645	0.234582	-0.000500055	0.101388	-9.88809e-05	0.809856	-0.0014389	0.0154535	0.000542857	0.524887	-0.0018442	0.0252508	-0.000677463	0.455224	-0.000758814	0.453195	-0.000936923	0.343422	1	0.875504
44201	SMAD3	0.0463082	0.0114808	0.00247496	0.330945	0.000212241	0.49943	-0.0131202	0.0100434	0.000183667	2.86561e-06	-0.000478687	1.28337e-07	0.00114979	2.52244e-11	-0.000265356	0.254847	-0.00260066	1.00281e-14	2.65977e-05	0.956508	0.000367082	0.430729	-8.55023e-05	0.868011	0.000342142	0.551166	0.000580967	0.297533	1	0.875504
51118	FCGR3B	0.0152351	0.387364	-0.00238707	0.33124	-0.00256517	2.17438e-17	0.164092	1.92071e-241	-3.299e-05	0.398118	0.00117802	4.47463e-39	-0.000115678	0.496973	-0.00122307	1.11799e-07	0.00156747	1.43213e-06	0.000291849	0.547008	0.00161892	0.000414757	5.16524e-05	0.918196	0.00043974	0.429462	-0.00272309	6.25465e-07	1	0.875504
50998	MIF	0.00655458	0.787992	0.00329649	0.331542	-0.000396923	0.342222	-0.0264703	0.000100067	0.00052021	5.08472e-22	-0.000720053	5.81618e-09	0.00160536	7.58394e-12	0.000724159	0.0220762	-0.000651257	0.147145	0.00108765	0.10553	0.00122792	0.052054	0.000536054	0.441228	6.4554e-05	0.93328	0.00100181	0.184503	1	0.875504
49625	PRDX1	0.260646	6.69353e-16	0.00436744	0.331663	-0.00261676	2.27806e-06	-0.0293225	0.00114052	0.000542879	3.24787e-14	0.000102284	0.533861	0.000977513	0.00170236	-0.000206739	0.624464	-0.00400431	1.79988e-11	0.0011955	0.175153	0.00108317	0.197159	-0.0013614	0.138202	0.00315188	0.00199662	-0.00104853	0.297148	1	0.875504
51345	CALCOCO1	0.0900782	0.0167931	-0.00510021	0.331787	-0.000967926	0.134054	-0.0642377	1.02545e-09	0.000533615	1.65327e-10	-0.00101955	9.7966e-08	0.00193537	9.30388e-08	-0.000620951	0.204905	-0.00662261	1.68884e-21	0.00146731	0.157045	0.00149758	0.12465	0.000846601	0.430073	0.000191931	0.872076	9.49388e-05	0.935005	1	0.875504
43355	PLG	-0.00153983	0.846976	0.00107806	0.33185	-0.000565967	3.55088e-05	0.0451673	1.41865e-91	0.00021118	5.89786e-35	-0.000158672	6.08189e-05	0.000628513	6.93317e-17	0.000427885	2.66234e-05	0.000726896	6.47249e-07	4.60965e-05	0.829327	-2.70191e-05	0.894412	0.000220474	0.326575	0.000853809	0.000639763	-0.00032292	0.184227	1	0.875504
44220	TRIM25	0.115334	0.00302256	0.0052457	0.332039	-0.00169842	0.0109057	-0.0643126	2.82943e-09	0.000309885	0.000203711	-0.000816281	2.38105e-05	0.00206226	1.83136e-08	0.000414581	0.401122	-0.00453792	1.97782e-10	0.000202765	0.845021	0.00171878	0.081656	-7.13968e-05	0.947878	-4.78133e-05	0.968721	-0.00118922	0.314796	1	0.875504
44409	MYBPC1	-0.909194	1.58701e-284	-0.00337387	0.332406	0.0222995	0	-0.430586	0	0.000929492	1.19133e-66	0.000702245	1.57296e-08	0.000943093	6.41362e-05	0.000214875	0.498959	-0.00398473	4.05086e-18	0.000274443	0.683338	-0.00273861	1.58761e-05	0.000912372	0.193525	-0.000714275	0.361993	0.00190426	0.0125259	1	0.875504
38575	CST1	-1.0308	1.085e-164	0.00505432	0.332417	0.0211492	8.32026e-234	-0.281844	3.46332e-159	-0.000218757	0.00655289	-0.00135286	1.16504e-13	0.00387089	1.09384e-28	-0.000704372	0.142892	-0.00394883	8.20345e-09	0.000879738	0.396228	-0.000260812	0.78491	-0.000491136	0.64389	-0.00170685	0.145635	0.00175485	0.121287	1	0.875504
49871	CASP1	-0.297302	2.93948e-33	0.00333949	0.332516	0.00625421	4.01198e-49	-0.06205	2.51731e-19	-1.69377e-05	0.756347	-0.000112777	0.368539	0.000727077	0.00225061	0.000849462	0.00809567	-8.97741e-05	0.844085	0.000583053	0.388373	0.00107268	0.0943767	-0.00096653	0.17009	-0.00384026	9.15207e-07	-0.00229906	0.00272262	1	0.875504
42745	PITHD1	0.225236	2.89063e-15	-0.00383929	0.332985	-0.00169571	0.000527615	0.0602188	3.25519e-14	-0.00024831	4.6035e-05	0.000140795	0.313971	-0.000320361	0.228909	0.000477268	0.186956	0.000165627	0.751327	-8.12563e-05	0.913919	-0.000197465	0.784952	-0.000433304	0.58672	0.00115729	0.194528	-0.000346143	0.690715	1	0.875504
44329	RBM17	0.120989	8.7124e-06	0.00366064	0.333026	-0.00142273	0.00229692	0.000794354	0.916398	-9.38751e-05	0.107751	-0.000192158	0.153061	0.00163825	1.55965e-10	0.000354417	0.305558	-0.00127344	0.0107064	0.00145981	0.0437542	-5.66231e-08	0.999935	-0.000667658	0.380847	0.000700863	0.410379	0.000964887	0.24383	1	0.875504
44201	GPRC5C	0.116582	5.9336e-09	0.00269247	0.33343	-4.52591e-05	0.895214	-0.0302598	5.66793e-08	-0.000307204	8.20198e-13	-0.000529512	9.16969e-08	0.000780191	3.45971e-05	0.000568093	0.0257972	0.00101781	0.00559489	0.000892071	0.0943851	0.000464197	0.362184	0.000349547	0.534399	7.98543e-05	0.898771	0.00119493	0.0500631	1	0.875504
51430	GFRA1	-0.665346	0	0.0013964	0.333437	0.0116309	0	0.0443223	5.76317e-53	-0.000617784	1.19415e-158	0.000271052	2.4012e-07	0.000562892	1.53258e-08	0.000551186	4.23556e-05	0.000396043	0.0381502	-0.000419253	0.141348	0.000599792	0.0252245	-0.000367682	0.212537	-0.00110003	0.000776127	0.000343087	0.283556	1	0.875504
44201	IMMT	-0.297412	1.5063e-75	0.00216816	0.333668	0.00736611	9.35835e-155	-0.146888	5.5289e-232	-3.45181e-05	0.318017	-0.000192637	0.0158342	0.000735743	1.25515e-06	0.000432848	0.0350093	0.000645018	0.0293028	0.000481609	0.262333	0.000332011	0.41855	-3.44229e-05	0.939464	0.000752989	0.136514	0.000231759	0.637133	1	0.875504
49867	ATP6AP2	-0.133715	2.64653e-20	-0.00195017	0.334122	0.0035271	9.68734e-46	-0.0536814	3.38888e-40	-0.000479072	1.57942e-50	6.01907e-05	0.413465	0.000148444	0.287286	0.000681974	0.000278639	-0.00103083	0.000116839	-0.000490045	0.21695	-0.000557946	0.136359	-0.000859759	0.0371909	-3.81378e-05	0.933673	-0.000550439	0.218577	1	0.875908
43232	PYDC1	-0.0637298	1.55036e-05	0.00197865	0.334531	0.00302493	6.38607e-33	-0.143854	1.49851e-265	-0.000463801	1.95517e-48	0.000545022	1.12622e-13	-4.15235e-06	0.976182	-0.000406087	0.030588	0.00116337	1.64631e-05	-0.000555864	0.156376	-0.00103109	0.00583436	2.29921e-05	0.955622	0.000127119	0.783617	0.00110158	0.0140412	1	0.876133
51082	F11R	-0.0197703	0.328686	0.00271748	0.335102	0.00162232	2.95069e-06	-0.0497302	1.37131e-18	-0.000277191	5.95266e-10	-0.000574738	2.16387e-08	0.00152862	4.13148e-15	0.00119757	5.16806e-06	-0.000691146	0.0640097	0.000187	0.737675	0.00119765	0.0225259	-0.000653555	0.258383	0.000741235	0.247013	0.00150539	0.0163904	1	0.876133
44043	CRISP3	0.260234	3.15235e-160	-0.00128649	0.335355	-0.00466539	1.02698e-174	-0.0049744	0.0626576	-0.000864434	0	0.000604951	6.82942e-37	-0.000875024	4.24065e-22	-0.00105496	5.24003e-18	-8.01126e-05	0.649075	-0.00102011	6.49738e-05	-0.0001959	0.421102	-0.000100039	0.709878	-0.000274446	0.361244	-0.00114456	9.03161e-05	1	0.876133
50116	IL10	-0.140977	1.26747e-06	-0.00390099	0.335649	0.00361683	4.2743e-13	0.0269265	0.000910815	0.000104394	0.105681	0.000450576	0.00236099	0.000261026	0.352341	-0.000205796	0.585928	0.00179339	0.000832597	-0.000902442	0.256091	-7.66413e-05	0.918909	0.00173077	0.0367678	0.000842003	0.360148	-0.000563435	0.530904	1	0.876133
51206	HSPA1A	-0.0123685	0.631865	0.00346485	0.335706	0.00163609	0.000219272	-0.0462646	1.38936e-10	5.76257e-06	0.919985	-0.000569432	1.521e-05	0.00192072	1.27605e-14	0.00126509	0.000171652	-0.00292849	8.0409e-10	0.000772478	0.279602	0.00158845	0.0181344	0.00156576	0.0340805	0.000317711	0.697116	0.00166331	0.0379146	1	0.876133
44329	HLA-A	-0.231916	3.92785e-89	-0.00154476	0.336369	0.00368271	1.02306e-76	-0.00155718	0.628194	2.79215e-05	0.260238	-0.000564283	5.67884e-23	0.00124887	1.76419e-30	-0.000938999	1.69238e-10	0.000774765	0.000258171	0.000160114	0.602718	-0.000730729	0.0127718	0.00025081	0.438497	0.000861122	0.017299	0.000627357	0.0745375	1	0.87708
44201	INSL4	-0.0603967	0.000816597	-0.00240637	0.337186	0.00298595	5.30125e-22	-0.0738887	6.23457e-49	0.000241395	4.24214e-10	0.000133804	0.133864	0.000930128	4.24245e-08	-0.000469318	0.0408879	0.00121517	0.000240314	0.000882726	0.0661172	0.000646189	0.15905	0.000389111	0.442567	-0.00151768	0.00727097	0.000266299	0.627806	1	0.878426
51518	PDCD5	-0.104914	6.7465e-07	0.00282187	0.337705	0.00329126	1.03699e-19	-0.104244	8.75782e-70	0.000988916	3.66248e-99	-0.00076275	1.24168e-12	0.00120919	2.9299e-09	0.00132634	1.41682e-06	-0.000325492	0.403599	0.00126042	0.0306805	0.000626859	0.252681	0.000816322	0.175686	-6.41585e-05	0.92338	0.00104028	0.11244	1	0.878709
50140	DNAJB8	0.191136	8.67055e-21	0.00272665	0.338018	-0.00175223	5.72925e-07	0.0375827	4.46365e-11	-0.000321686	1.19667e-12	-8.93232e-05	0.390095	0.000356653	0.0702568	-0.000284697	0.28442	-0.000933188	0.013289	-0.000223733	0.688504	0.000237697	0.653405	-0.000570416	0.326573	0.000541902	0.400662	0.00123412	0.0510446	1	0.878709
49871	FMNL1	-0.00699824	0.76306	-0.00309879	0.338196	0.00224598	1.69992e-08	-0.124573	4.38061e-82	0.000152167	0.00298945	-0.000216805	0.0655992	0.0012462	2.45555e-08	0.000231526	0.442048	0.000764792	0.074348	0.000573377	0.36628	0.00124655	0.0384171	0.00138301	0.0365444	-0.00388354	1.24096e-07	-0.00167193	0.0202483	1	0.878709
43195	RRAS	0.428442	3.5942e-20	0.00618658	0.338929	-0.00563959	1.64774e-12	0.0660712	3.31929e-07	3.45854e-05	0.728968	-0.000449924	0.0505957	0.00205416	2.7506e-06	0.00122217	0.0389117	-0.00505009	3.16758e-09	0.000596699	0.627458	0.000584617	0.620805	-0.000143575	0.91213	0.00370495	0.0108201	0.0015007	0.289966	1	0.879831
50140	CA5A	-0.033198	0.32243	-0.00446375	0.339513	0.00721762	4.87406e-36	-0.535072	0	-0.000101367	0.172617	-0.00126344	1.35364e-13	0.00268947	9.56901e-17	0.00137293	0.0016701	0.00440558	1.10774e-12	0.000255419	0.780479	0.000901113	0.299912	0.000459924	0.630026	-0.00154745	0.143891	0.00214839	0.038609	1	0.880111
51706	CCL15	-0.556554	1.34742e-274	-0.00207952	0.339828	0.011941	0	-0.0548575	3.08673e-36	0.00118412	8.88809e-254	-0.000913647	2.151e-30	0.00143019	2.91942e-21	0.000743775	0.000266253	-0.00165613	9.26876e-09	6.59371e-05	0.87848	-0.00233489	8.70772e-09	0.00110281	0.0134648	0.000266817	0.588904	0.00165059	0.000654031	1	0.880111
51082	CD109	-0.378585	4.42283e-220	0.00158131	0.33994	0.00621795	2.8096e-202	0.0495348	3.18373e-50	0.000407212	6.41031e-54	-0.000233774	0.000106812	0.00062575	4.53224e-08	-0.000148266	0.336973	0.00115407	1.43173e-07	0.00107051	0.00110619	0.000366289	0.235175	0.00119751	0.000426377	0.00067516	0.0728156	-0.000152011	0.680082	1	0.880111
51082	NUDT5	-0.0254064	0.167956	0.00244676	0.34043	0.00189993	1.82543e-09	-0.0955909	7.29602e-77	-2.338e-06	0.954245	-0.000291664	0.00180187	0.000888923	5.2796e-07	0.00072792	0.00233954	-0.000898164	0.00819786	0.000889503	0.0801138	0.000781862	0.101837	0.000362801	0.490706	0.00080317	0.168245	0.000765384	0.180096	1	0.880236
44480	C5	-0.0995638	2.8598e-76	0.000712675	0.34089	0.00167717	1.27796e-73	0.00929014	5.37032e-10	4.55262e-05	7.73543e-05	4.58305e-05	0.0850293	0.000174444	0.000566636	-2.86474e-05	0.67568	-0.000184789	0.0608828	9.32057e-05	0.515672	0.000158973	0.244777	-4.5258e-05	0.764481	-0.000130875	0.437188	-0.000132006	0.420049	1	0.880236
50999	IL7	0.136575	3.03712e-09	0.00305745	0.34106	-0.00180439	4.92755e-06	-0.0212271	0.000971191	-0.000392262	1.74673e-14	-0.000547382	3.01347e-06	0.000422415	0.0571262	0.0012788	2.12221e-05	-0.00161357	0.000150277	0.00103823	0.101026	0.000134767	0.821488	-0.00113436	0.0840266	0.00191797	0.00842583	0.000279849	0.695073	1	0.880236
50998	VSIR	-0.0275853	0.209047	0.00291286	0.341194	0.00253846	1.60386e-11	-0.0481339	4.19304e-15	-0.000409345	4.56284e-17	-0.000251588	0.0244593	0.0014575	6.14449e-12	0.00140067	1.08665e-06	-0.0010335	0.0107718	0.000808123	0.182365	-8.88982e-05	0.876329	-0.000348477	0.578527	0.001795	0.00966554	0.00150868	0.0269862	1	0.880236
50836	CA12	-0.193698	3.31849e-62	-0.00154043	0.341494	0.00327637	1.43609e-60	0.044436	1.27559e-42	-0.000272306	3.1985e-26	0.000320942	5.47509e-08	0.000718664	1.41843e-10	-0.000392547	0.00931215	-0.00107249	5.77074e-07	-0.000605104	0.0639948	0.000129976	0.665429	-0.000448491	0.177498	-0.00107547	0.00344201	0.00099325	0.00580309	1	0.880236
43602	CCND2	-0.203107	1.21189e-53	0.00173682	0.342307	0.00282772	5.95087e-36	0.0340281	1.50138e-20	0.000263619	8.41083e-21	-3.1007e-05	0.634296	-8.7292e-05	0.482057	8.97974e-05	0.592331	-0.000132389	0.582992	7.62036e-05	0.827769	3.74244e-06	0.991083	5.66306e-05	0.878115	0.000344678	0.402807	-6.16653e-05	0.878304	1	0.881065
50999	CD84	0.080695	4.85096e-13	0.00147605	0.342859	-0.00169478	8.6415e-19	0.0198266	2.05133e-10	-0.000445298	5.68493e-72	-0.000186134	0.00104836	0.000687104	1.7187e-10	0.000166686	0.25273	-0.000810135	8.58375e-05	-0.000197903	0.518869	0.000762273	0.00844818	-0.000605412	0.0570461	0.00032689	0.354112	-0.000392665	0.256372	1	0.881065
44300	HDGFL2	0.0394393	0.0866057	0.00303681	0.342992	0.0010772	0.00636561	-0.0920184	1.0386e-46	0.000143326	0.00373518	-0.000315756	0.00553183	0.00100984	3.1156e-06	0.000664269	0.0231176	-0.000808613	0.055325	0.000124466	0.838996	0.000365427	0.531392	6.74431e-05	0.916715	-0.00139814	0.0524554	-0.00122143	0.0810899	1	0.881065
42986	RNASE4	-0.540183	0	-0.00133569	0.343022	0.00974545	0	-0.00543577	0.0538404	-0.000194064	4.45904e-19	-6.12423e-05	0.221403	0.00123554	2.12333e-38	0.000316953	0.0137772	-0.000186093	0.316408	-0.000211593	0.428464	0.000203088	0.428972	-0.000167902	0.552719	-0.000493434	0.119605	0.000774154	0.0119271	1	0.881065
50594	CALCA	0.0420336	0.0616828	-0.00296911	0.343526	0.0104672	6.58663e-161	-0.953339	0	1.31916e-05	0.791156	-0.000528807	3.72088e-06	0.00219407	4.49197e-24	-0.000445239	0.129997	0.00118494	0.00429479	0.00076398	0.214927	0.00237991	4.7437e-05	0.00151875	0.0177837	0.00200336	0.00483931	-0.000824807	0.23809	1	0.881586
43434	CHAD	-0.303136	7.37244e-60	0.00243423	0.34543	0.0039729	1.0305e-35	0.11671	1.3164e-112	-2.30321e-05	0.562176	0.000359866	8.65779e-05	4.7906e-05	0.7837	-0.000956128	5.33103e-05	-0.000723626	0.0329792	0.00154245	0.00188079	-0.00111953	0.0173081	0.000842857	0.104491	-0.000256462	0.659859	-0.000260886	0.643005	1	0.881685
51076	THBD	-0.333775	2.45053e-237	-0.00132655	0.345547	0.00733508	0	-0.135274	0	-0.000177872	2.10578e-15	-3.03689e-05	0.554833	0.000611976	3.42065e-10	-0.000119064	0.367285	-0.000914959	9.00142e-07	-0.000138827	0.618337	-3.02753e-05	0.908208	0.00038183	0.185529	-1.75471e-05	0.956107	0.00135706	1.51601e-05	1	0.881685
42978	ADGRV1	0.118416	1.90333e-06	-0.00326185	0.345736	-0.000909624	0.0328373	0.0227943	0.000984603	-7.28174e-05	0.17214	-5.66233e-05	0.64569	0.00054285	0.0205637	-0.000331226	0.29389	0.000240274	0.598458	0.000114788	0.861009	3.41997e-05	0.956904	-0.000276518	0.691421	-0.000716484	0.356345	-0.000412239	0.587216	1	0.881685
51431	CD5	-0.242562	2.6643e-84	-0.00163705	0.345736	0.00336609	6.49296e-56	0.119237	5.15848e-255	-6.51598e-05	0.0181105	-0.000175472	0.00541874	0.00105171	1.54096e-18	8.72712e-05	0.589944	0.00111524	1.21279e-06	0.000132597	0.698924	0.000957756	0.00297039	-0.000438489	0.216479	-0.000592695	0.132143	0.000549252	0.153432	1	0.881685
42948	TSPAN15	0.0725365	5.85417e-05	0.00237084	0.345801	-0.000190627	0.538148	0.032957	5.49366e-11	7.27321e-05	0.0593814	-0.000208038	0.0193585	0.000198867	0.240366	6.23488e-05	0.785593	-4.40284e-05	0.894347	0.000511067	0.282727	0.000233974	0.609612	7.19627e-05	0.886714	-0.000690202	0.221366	0.000309497	0.573963	1	0.881685
43120	POF1B	-0.348719	4.17753e-102	-0.0021284	0.345859	0.00677869	2.32975e-130	0.0589235	7.03959e-39	-0.000252873	3.48062e-13	-0.000308848	0.00012608	0.000564482	0.00022335	3.28369e-05	0.873593	0.000900017	0.00247299	-8.14734e-05	0.849463	-0.000194813	0.636288	-9.78067e-05	0.829572	0.000516795	0.308603	0.00054973	0.266842	1	0.881685
51631	GMPR	-0.0827886	3.54377e-06	0.0023466	0.346115	0.00273408	4.46484e-19	-0.211436	0	0.000197047	6.64276e-07	-0.00051928	1.0987e-08	0.00100614	5.16305e-09	8.26588e-05	0.722012	-0.00190984	6.80024e-09	0.000916205	0.0628347	-8.75764e-05	0.849642	-0.000304966	0.548699	-0.000476263	0.39879	0.000399989	0.468792	1	0.881685
42820	PDIA2	0.0727828	4.18323e-07	-0.00188275	0.346483	-0.0008695	0.000424344	0.00820847	0.0402334	-7.66462e-05	0.0125454	-8.89638e-05	0.207431	-1.3029e-05	0.92277	-0.000183825	0.313775	5.73728e-05	0.827733	-0.000237725	0.530945	-0.000388158	0.287837	-0.000117821	0.769613	0.000140531	0.754845	-0.000270365	0.538011	1	0.881685
42978	TSPAN7	0.476207	3.69296e-46	0.00436723	0.34671	-0.00328466	9.29683e-09	-0.0555981	2.10475e-09	-0.000815417	4.79532e-30	0.000458357	0.00553792	-0.00104311	0.000910082	0.000391291	0.355355	-0.0023227	0.000148079	-0.00076549	0.384121	-0.0019372	0.0225173	-0.00238799	0.0106195	0.00198057	0.0573755	-0.00026845	0.792158	1	0.881685
44480	TF	0.135549	2.77722e-68	-0.00101434	0.346947	-0.00256763	8.71897e-83	0.0221262	1.12709e-24	-9.85077e-05	2.97189e-09	-0.000267967	2.85043e-12	0.000837198	1.85062e-30	0.000514748	1.8379e-07	-0.000356572	0.0120936	0.000151503	0.46349	-3.5912e-05	0.855341	4.88776e-05	0.822369	-0.000629559	0.00951233	0.000888357	0.000166715	1	0.881685
44201	LAMTOR5	0.0571282	9.11752e-05	0.00190554	0.347561	-0.000144432	0.564102	-0.0286914	1.63237e-12	-5.79344e-05	0.0639133	0.000105292	0.144852	0.000157535	0.2512	0.000142988	0.44132	-0.00103806	0.000105599	-0.00015115	0.697337	0.000459079	0.216241	-0.000348595	0.395192	0.000304103	0.506193	0.000488542	0.271639	1	0.881685
51000	FAM3C	-0.57923	0	-0.00139167	0.348013	0.0111629	0	-0.089493	1.2478e-197	-0.000343999	5.99201e-48	-0.000270509	5.99939e-07	0.000918759	3.77091e-19	0.000270004	0.0524197	-0.00012566	0.522226	-0.000197355	0.501519	-0.00069466	0.0120725	-2.17214e-05	0.943031	0.000417794	0.214144	0.000685325	0.0381538	1	0.881685
43145	IFI30	-0.832494	0	0.00192116	0.348299	0.0157382	0	-0.0648398	3.89376e-56	0.000314849	3.19689e-23	-0.000565874	1.3103e-14	0.00131262	4.16952e-21	0.000837032	7.96421e-06	0.00162581	1.84585e-09	-8.80834e-05	0.821989	0.000448569	0.230545	0.00133683	0.00121191	0.000638644	0.16931	0.000153341	0.732239	1	0.881685
42948	MRPL24	-0.0297631	0.032002	-0.00181303	0.348489	0.000931462	9.17733e-05	-0.00291704	0.45032	-0.000165952	2.22974e-08	0.00014768	0.0308686	-0.000115131	0.376753	0.000361648	0.0401799	-8.07991e-05	0.751296	-6.49897e-05	0.859007	-8.45374e-05	0.810394	0.000422843	0.276354	5.74269e-05	0.894734	0.00053565	0.205747	1	0.881685
43993	TTR	0.119025	1.22952e-39	-0.00117706	0.348618	-0.000570858	0.000226713	-0.174418	0	-0.000310439	6.02243e-58	0.000194776	1.25625e-05	-0.00084053	4.22119e-23	-9.0827e-05	0.430404	-0.000459899	0.00543048	-0.000480961	0.0447957	-0.00101649	9.77631e-06	-0.000613913	0.015329	-0.00064219	0.0230988	-0.000165351	0.547687	1	0.881685
51291	SIGLEC1	-0.65104	0	0.00203531	0.348794	0.0117255	0	0.0167811	0.000114747	0.000767819	5.02062e-109	5.44985e-06	0.945192	0.00133778	5.24434e-19	0.00207595	1.83293e-24	0.00231187	9.43148e-16	0.00111255	0.00992298	0.00177366	1.24141e-05	0.00164491	0.000227512	0.00168383	0.00063314	0.00115043	0.0173572	1	0.881685
44220	OGA	0.0770963	0.00230276	0.00329363	0.349002	-0.000390332	0.3683	-0.0608836	5.30052e-18	1.95915e-05	0.718007	-0.000497898	7.38473e-05	0.00145384	1.06136e-09	0.000446118	0.164748	-0.00262991	1.42176e-08	0.00057506	0.393951	0.00102231	0.111278	-0.000644285	0.364352	-0.000260723	0.742315	-0.000707833	0.357564	1	0.881685
43232	MAN1A2	-0.483503	0	0.00119887	0.349548	0.00792966	0	0.0616653	6.54339e-127	-0.000470751	3.56398e-124	0.00037496	3.02993e-16	-6.57107e-05	0.449714	4.50223e-05	0.7013	-0.000692524	4.07887e-05	-0.000498551	0.0419738	-5.57933e-05	0.811351	0.00014515	0.574081	-0.000931206	0.00129007	-0.000166582	0.552337	1	0.881685
44409	CHMP6	-0.0107816	0.593007	0.00262297	0.349606	0.000683842	0.0481247	-0.0265586	2.2138e-06	-0.000125602	0.00376203	-0.000357781	0.000349423	0.001109	5.42533e-09	0.000817209	0.00141466	-0.00132347	0.000345395	0.000756934	0.162573	0.000680206	0.183255	-0.000305206	0.589273	0.000352201	0.576891	0.000551913	0.369011	1	0.881685
43120	CD226	0.063226	2.27031e-05	0.00193937	0.350779	-0.00104747	4.28576e-05	0.030139	4.11153e-13	-0.000313594	1.15489e-22	0.000163738	0.0272288	0.000688796	9.96054e-07	0.00070227	0.000219032	-0.000497392	0.0691991	-0.000213002	0.589848	-0.000522682	0.168113	-0.00103627	0.0132345	-1.1631e-05	0.98014	0.00016121	0.723542	1	0.881685
51505	PRDX6	0.169328	1.23091e-14	0.00285441	0.351284	-0.00221753	3.84245e-09	-0.0198479	0.00120417	7.65817e-05	0.115372	0.000247274	0.0263443	-2.51621e-05	0.905122	-0.00134552	2.47982e-06	-0.0022568	2.54124e-08	0.000506272	0.402638	0.000377567	0.506775	0.00044725	0.474862	-0.000534654	0.441229	-0.000216641	0.749594	1	0.881685
44220	RBP7	-0.601264	1.43509e-156	0.00291073	0.351421	0.0113712	1.54775e-189	0.0754746	1.6477e-33	-0.000726775	2.81967e-51	-0.000112422	0.313606	0.000855819	5.27083e-05	0.000444825	0.118848	-0.000107553	0.793976	0.000678525	0.257439	0.000517957	0.363665	0.00051348	0.415675	-0.00407249	7.42261e-09	-0.00138413	0.0428191	1	0.881685
43120	VAMP8	0.169469	7.81957e-08	0.00409351	0.351515	-0.00216197	6.4754e-05	-0.00827675	0.346015	7.72455e-05	0.253354	-0.000379043	0.0156003	0.00192588	9.78797e-11	0.00104584	0.00921897	-0.0013101	0.0235713	0.0007467	0.371367	0.00136085	0.0896004	0.000222424	0.801391	0.00171333	0.0828141	6.43494e-05	0.946747	1	0.881685
49867	STX6	0.234377	4.00855e-22	-0.00314436	0.352018	-0.00143683	0.000541332	-0.025022	0.000215578	0.000238181	8.73627e-06	-0.000406019	0.00097824	0.000896106	0.000123707	6.75723e-05	0.829591	-0.00333571	9.39448e-14	-0.000479676	0.470127	-0.000542793	0.386493	-0.00083788	0.224905	0.00219668	0.00417441	-0.000547526	0.464541	1	0.881685
43602	MAGEA3	-0.0789363	0.00879414	0.003895	0.352464	-0.000255503	0.621101	0.0128551	0.125141	-4.36971e-06	0.945997	-6.35118e-05	0.670532	0.000155957	0.583428	0.00041412	0.280959	0.000344635	0.532619	0.000909174	0.257078	-0.00199203	0.00940025	0.0008126	0.336654	-0.00198831	0.0351079	-0.000355681	0.699786	1	0.881685
50999	HEXIM1	0.0261006	0.374457	-0.00380948	0.352588	0.00105006	0.0372286	-0.11598	3.26013e-45	0.000517864	2.14304e-15	-0.000934745	4.14057e-10	0.00238804	3.6135e-17	0.000533826	0.164253	-0.00310014	1.15284e-08	0.000625618	0.43871	0.0012728	0.0949449	-0.000584711	0.485235	0.000966902	0.297971	-0.000833198	0.360439	1	0.881685
44300	CDH23	0.0126316	0.181215	-0.0012216	0.352742	-0.000331667	0.0407052	0.0114093	1.42724e-05	-0.000177025	2.74075e-18	0.000154265	0.000960253	-0.000210024	0.0181371	-0.000206918	0.0847533	-0.000356794	0.0394081	-5.39279e-05	0.83019	-0.000613593	0.0104634	-1.0272e-05	0.969049	-0.000935202	0.00157699	-0.000534355	0.0630098	1	0.881685
50116	PRDX3	0.0796817	0.00203667	0.00333935	0.353196	6.32207e-05	0.886509	-0.0514745	9.27543e-13	0.000511718	4.25404e-19	-0.000440661	0.000808921	0.0017779	9.73891e-13	0.000931102	0.00549944	8.10853e-05	0.864847	0.00161867	0.0217573	0.00142708	0.0327305	-0.000228009	0.756628	0.00148584	0.0689142	0.000879785	0.270379	1	0.881685
43232	DMP1	-0.0674423	0.00228484	0.00285388	0.353202	-0.00183907	1.23553e-06	0.243686	0	-0.000535283	1.98059e-29	0.000307784	0.00514837	-0.00110325	1.22206e-07	-0.000879993	0.00177549	-0.000687832	0.0892983	-5.9073e-06	0.991984	-0.00109301	0.0512519	-0.000498742	0.420734	0.00142621	0.0398821	-0.00175152	0.00919034	1	0.881685
50913	SPINT1	-0.0336215	0.000276959	0.00119491	0.353515	0.000996467	3.29406e-10	-0.016597	1.28348e-10	0.000352664	1.9838e-66	0.000261661	2.5785e-08	0.000388342	1.28811e-05	0.000557368	3.3726e-06	0.00137293	8.15377e-16	0.000507053	0.0466559	0.000474467	0.0478971	0.000554883	0.0357117	0.000626719	0.0321226	0.00052566	0.0663541	1	0.881685
49709	SCARB2	-0.940451	0	-0.0014777	0.353593	0.0170311	0	0.00826883	0.00954391	-5.53715e-06	0.826675	0.000101215	0.080433	0.000911401	1.09485e-16	0.000272162	0.0680117	0.000466434	0.0268664	-3.33129e-05	0.915051	-0.000169121	0.569304	0.000222289	0.494306	0.000556899	0.122892	0.000544828	0.125507	1	0.881685
50999	ISM1	-0.647672	0	0.00183895	0.353603	0.0100974	0	0.115742	3.92465e-185	-0.00023149	2.29095e-13	-0.000420569	6.17638e-09	0.00120954	1.13751e-18	0.00102853	3.04143e-08	0.00026336	0.316208	-0.000614752	0.11573	0.000624019	0.0905727	-0.000785542	0.0525992	0.000157064	0.726719	0.000343291	0.436029	1	0.881685
44201	GABARAP	-0.192124	2.26791e-28	0.00223894	0.353893	0.00461395	6.91383e-54	-0.0450993	1.12762e-20	-8.77512e-05	0.0184111	-7.59854e-05	0.376805	0.000537535	0.00100707	-0.000959866	1.41733e-05	-0.000338849	0.287683	-3.59118e-06	0.993807	-0.000784754	0.0758061	-1.73835e-05	0.97159	0.000485794	0.372382	-0.000237923	0.652928	1	0.881685
43232	AHNAK	-0.49536	0	-0.00152768	0.354331	0.009196	0	-0.0306188	1.82924e-20	-0.000255755	1.10605e-23	-0.000190006	0.00128761	0.00113241	4.70545e-24	0.000159637	0.29063	-0.000694636	0.00138445	0.00054	0.0869612	0.000117496	0.696122	0.000625875	0.0596923	-0.00130375	0.000463696	0.000279388	0.438678	1	0.881685
43232	EDN1	-0.527208	0	0.00137655	0.354923	0.00927653	0	0.0148668	5.98179e-07	-0.000353953	2.34748e-53	0.000184574	0.000528858	0.000552272	4.48548e-08	0.000430579	0.0015822	0.000346028	0.0774298	0.000145439	0.609354	-0.00032458	0.231742	5.96896e-05	0.842213	0.000425314	0.205519	0.000298184	0.359592	1	0.881685
49867	MAEA	-0.0213783	0.128161	0.00181169	0.355265	0.00110708	4.32961e-06	-0.0258075	4.77299e-11	7.35693e-05	0.0178959	-0.00013333	0.0619894	0.000370365	0.00623457	-0.000109394	0.548059	-0.000835857	0.00128813	-0.000153529	0.690237	-1.91319e-05	0.958034	0.000618489	0.122509	-0.000357986	0.420912	0.000829052	0.0562435	1	0.881685
44220	CIRBP	-0.181126	1.11642e-07	0.00438123	0.355866	0.00280086	1.72027e-06	-0.0495656	1.80489e-07	0.000267611	0.000256681	-0.000571191	0.000751821	0.00180047	2.15805e-08	0.0011494	0.00798516	-0.0023483	0.000174695	0.000543655	0.550318	0.00134149	0.121457	-0.00048513	0.612712	0.00105587	0.323735	0.000842047	0.417291	1	0.881685
43967	CWC15	-0.0294822	0.1829	-0.00284154	0.355943	0.00349348	3.73635e-20	-0.07827	6.34492e-37	-0.000241323	3.96527e-07	1.24666e-05	0.909647	0.000214798	0.302529	0.0010579	0.000166592	-0.000283883	0.483982	-0.000462691	0.432392	0.00040806	0.467692	-0.000961245	0.122031	-0.00241571	0.0005024	-0.000607464	0.366639	1	0.881685
165	GLIPR1	-0.535024	0.0107366	-0.0281421	0.356105	0.00756504	0.0316613	0.10753	0.0849299	0.000802421	0.331808	-0.00394956	0.3144	-0.00568282	0.396818	-0.000795952	0.924186	0.00179351	0.721265	-0.0680626	8.25372e-05	-0.0101848	0.370573	0.0289731	0.0187973	0.00432538	0.59184	-0.00663597	0.474646	1	0.881685
51505	ANGPTL7	-0.44025	1.35323e-247	-0.00167674	0.356327	0.00888437	0	-0.115161	9.31602e-218	-0.000210682	2.98184e-13	-0.000243864	0.000224326	0.00064135	3.09846e-07	0.00110248	8.01174e-11	0.000373475	0.120385	-0.000381091	0.288566	0.000639666	0.0581366	-0.000175542	0.636581	-0.000692341	0.0929644	-0.000803276	0.0461929	1	0.881685
43602	CD3E	0.0236828	0.0585395	0.00160329	0.357023	-3.46799e-05	0.871737	0.00351908	0.31237	-2.78604e-05	0.298691	-6.16347e-05	0.32047	-0.000103402	0.3816	-4.03021e-05	0.80065	-0.000106637	0.642183	-0.000172382	0.60508	-0.000159385	0.617015	3.19495e-05	0.927566	0.000141237	0.718699	-0.000214594	0.57557	1	0.881685
42820	DNAJA1	0.0667611	5.272e-05	0.00211395	0.357213	-0.000655194	0.0207054	0.0134347	0.00345267	-7.09059e-05	0.0442638	4.48566e-05	0.579816	5.99765e-05	0.697496	0.000206629	0.324014	-0.000245132	0.418036	0.00020679	0.634981	-9.47742e-05	0.821168	-2.06073e-05	0.964412	0.000954609	0.0646771	8.90121e-05	0.859826	1	0.881685
51122	PKLR	0.0377303	0.114119	0.00306262	0.35753	0.00160874	8.54739e-05	-0.106386	3.56966e-57	0.000340439	1.45982e-10	-0.000523083	1.7605e-05	0.000534775	0.020321	-0.000880015	0.00469044	0.0010946	0.0130427	0.00165263	0.0123429	0.000943681	0.128854	0.00246988	0.00029926	-0.00381245	4.46382e-07	0.000720858	0.330533	1	0.881685
43195	SLC1A4	0.255691	5.66225e-44	0.00234804	0.357571	-0.00333934	3.14523e-26	0.0193579	0.000149984	-0.000251692	1.65508e-10	0.000105349	0.245929	3.44089e-05	0.842179	6.64647e-05	0.775887	-0.000601642	0.0736317	0.000317438	0.51283	9.5896e-05	0.837028	0.000815571	0.112074	-0.00119688	0.0368977	0.000307665	0.582373	1	0.881685
44409	COX6B1	0.0101277	0.380981	0.00147795	0.357745	0.00036263	0.0674434	-0.0126891	7.94679e-05	2.72443e-05	0.272755	-0.000152243	0.00792957	0.000557333	3.1215e-07	0.000325517	0.0265214	-0.000489855	0.0208096	2.55821e-05	0.934362	7.88572e-06	0.978522	-0.000397737	0.219558	0.000306542	0.396793	0.000215135	0.541177	1	0.881685
51076	CCL27	-1.44779	0	-0.00278497	0.357842	0.0256673	0	-0.0657786	2.36088e-27	-0.00124964	7.23975e-147	-0.000382714	0.000549779	0.000362477	0.0841705	0.00168397	3.22634e-09	0.000811123	0.043154	-0.000244735	0.683419	0.000618052	0.274444	-0.00074915	0.227786	-0.000999173	0.14562	0.000135278	0.841273	1	0.881685
51706	CPB1	-0.194957	1.2627e-20	0.00268112	0.358258	0.00489274	3.02584e-42	-0.105297	2.0502e-72	-0.000951925	2.452e-93	-0.00027957	0.00882298	0.000476046	0.0186241	0.000650396	0.0173022	-0.000841503	0.0293378	0.000695973	0.228302	-0.0030448	2.12346e-08	-0.000805292	0.177935	-0.00200352	0.00245162	3.42402e-05	0.957906	1	0.881685
42948	KIF22	-1.04229	7.29414e-125	0.00558999	0.358695	0.0172865	7.3317e-117	-0.0811104	2.6785e-11	-0.000497113	1.03697e-07	-8.06915e-05	0.707996	0.00155272	0.000153779	0.00126563	0.0226008	-0.00157804	0.0493669	0.00078986	0.49301	0.00188676	0.0890881	-0.00157342	0.198387	0.00108534	0.427168	-0.00050876	0.702745	1	0.881685
44201	LRRFIP1	0.0597858	0.000697681	0.00224789	0.358915	0.000420262	0.164691	-0.0394338	9.2596e-16	-0.000122097	0.00122585	-0.000348004	6.62528e-05	0.000828954	5.78271e-07	0.000230193	0.304763	-0.00204395	2.61408e-10	-6.17059e-05	0.895416	0.000852663	0.0572287	-0.000329578	0.5057	-0.000466187	0.398807	-0.000305271	0.569543	1	0.881685
43120	CSNK1D	0.289148	5.74808e-37	-0.00290374	0.359301	-0.00333736	1.22147e-17	-0.0109056	0.0850185	-0.000527487	3.01505e-27	0.00026978	0.0169721	0.000111174	0.604314	0.000362388	0.210743	-0.00321135	1.40874e-14	-0.00092932	0.122785	-0.00222754	0.000116229	-0.00147482	0.0206942	0.00116213	0.102681	-0.00104362	0.132958	1	0.881685
49871	SIGLEC15	0.272715	1.4188e-22	0.00355785	0.359905	-0.00174907	0.000254864	0.0705117	1.33605e-19	-0.000234432	0.000140041	-5.89881e-05	0.676613	-3.83769e-06	0.98859	0.000330122	0.361439	0.000446898	0.385288	0.00101958	0.181024	0.000877555	0.224916	-0.00142115	0.0736404	-0.000179479	0.838759	-0.00138937	0.108187	1	0.881685
43602	PRUNE2	-0.0537791	1.83269e-07	0.00131216	0.359993	0.00153059	5.18105e-18	-0.0257716	2.70191e-19	4.12882e-05	0.0614544	-4.63689e-05	0.364075	0.000177997	0.0674049	-4.7576e-05	0.717375	0.000328011	0.0826433	0.000422903	0.123434	0.000335185	0.201574	0.000234795	0.41721	0.000215456	0.504609	-0.000198552	0.52932	1	0.881685
43120	MCEMP1	0.0591598	0.0670405	0.00411557	0.360328	0.000776519	0.161117	-0.0101409	0.259512	-0.000996249	8.03422e-47	0.000440626	0.00604843	0.00123698	4.92731e-05	0.00177145	1.65641e-05	0.000772905	0.192084	0.00125768	0.141463	-0.000719502	0.380762	0.000647648	0.474427	0.00167766	0.0971765	-0.000168137	0.86467	1	0.881685
42948	CYP24A1	0.241241	4.99662e-15	-0.00392655	0.360378	-0.000630486	0.23298	0.0226353	0.00832581	2.43168e-05	0.711939	1.87133e-05	0.901927	-0.000133526	0.644235	-0.000403234	0.302722	0.000263171	0.641926	0.00122141	0.132615	-0.000109232	0.88894	-0.00170386	0.0481705	-0.00221781	0.0213453	-0.0017454	0.0632693	1	0.881685
51279	AXL	-0.152095	7.86581e-54	-0.00125191	0.361187	0.00323892	6.35898e-82	-0.04252	5.24655e-54	6.02047e-05	0.00571298	-0.000302472	1.70289e-09	0.00107409	1.42297e-29	-0.000678145	1.3713e-07	-0.00146335	7.57012e-16	0.000133187	0.622715	0.000148733	0.56114	0.000220127	0.432901	-0.000630803	0.0421835	-0.000178698	0.557803	1	0.881685
42948	RBM19	0.0890814	1.14391e-07	0.00213508	0.361654	-0.000586332	0.0419085	0.0098178	0.0358025	-0.000212948	3.03195e-09	0.000123285	0.136476	-0.000409089	0.00946211	3.78148e-05	0.859293	2.84043e-05	0.926654	0.000379599	0.391291	-0.000784829	0.0657251	0.000157528	0.737573	-0.000535287	0.308188	-8.74666e-05	0.864445	1	0.881685
51380	FUCA1	-0.411502	1.6992e-45	-0.00368978	0.361998	0.00539409	2.57331e-27	-0.118104	5.22935e-48	0.00234651	1.2288e-288	-0.00197879	1.28389e-40	0.00118422	2.48664e-05	0.00147427	0.000102211	0.000247506	0.644179	-0.000117486	0.883203	0.001907	0.0114375	-0.00196918	0.0175032	-0.00204755	0.0255004	0.00231853	0.0100196	1	0.881685
43434	AKAP12	-0.0893709	2.38049e-32	0.000956113	0.362033	0.00151023	1.93094e-31	0.0253639	1.3534e-33	-5.82395e-05	0.000312594	9.14204e-05	0.0141701	3.34561e-06	0.962392	-6.14927e-05	0.522664	-0.000711225	2.54657e-07	0.0001882	0.350863	-0.00029762	0.119629	-0.000298973	0.156653	0.000416868	0.078486	2.05194e-05	0.928551	1	0.881685
51045	CD40	-0.311585	1.51025e-67	0.00227256	0.362586	0.00682072	1.12385e-108	-0.0245411	9.27627e-07	-0.000109891	0.00565386	-0.000221432	0.0152613	0.00173525	1.01393e-23	0.00159285	9.21633e-12	-0.000950824	0.00405772	0.000564697	0.254122	0.000740322	0.112376	-0.000751612	0.14244	0.00145016	0.0104546	0.00156364	0.00488211	1	0.881685
[truncated: 1,725 more rows]

## Sheet: STX4
Demographics of the UKB-PPP cohort with neuroimaging data
Variable	Category	Overall
n		5443
age, mean (SD)		54.2 (7.8)
sex, n (%)	Female	2911 (53.5)
	Male	2532 (46.5)
ethnicity, n (%)	Asian	42 (0.8)
	Black	40 (0.7)
	Mixed	36 (0.7)
	Other	34 (0.6)
[truncated: 18 more rows]

## Sheet: STX5
Associations of selected circulating protein levels and WMH volume
[truncated: 9 more rows]

[truncated: 10 more sheets: STX6, STX7, STX8, STX9, STX10, STX11, STX12, STX13, STX14, STX15]
